# Supplementary material for: Aedes aegypti Strain Subjected to Long-Term Exposure to Bacillus thuringiensis svar. israelensis Larvicides Displays an Altered Transcriptional Response to Zika Virus Infection
Source: MDPI journal article supplement (doi:10.3390/v15010072), 2022-12-27
Supplement: s1 [file s1]

**Figure S1:** Multidimensional scaling plot of the gene expression profile by RNA-seq comparing the *Aedes aegypti* females from a strain exposed to *Bacillus thuringiensis* svar. *israelensis* (RecBti F<sub>35</sub>, black) and a reference strain (RecL, gray).

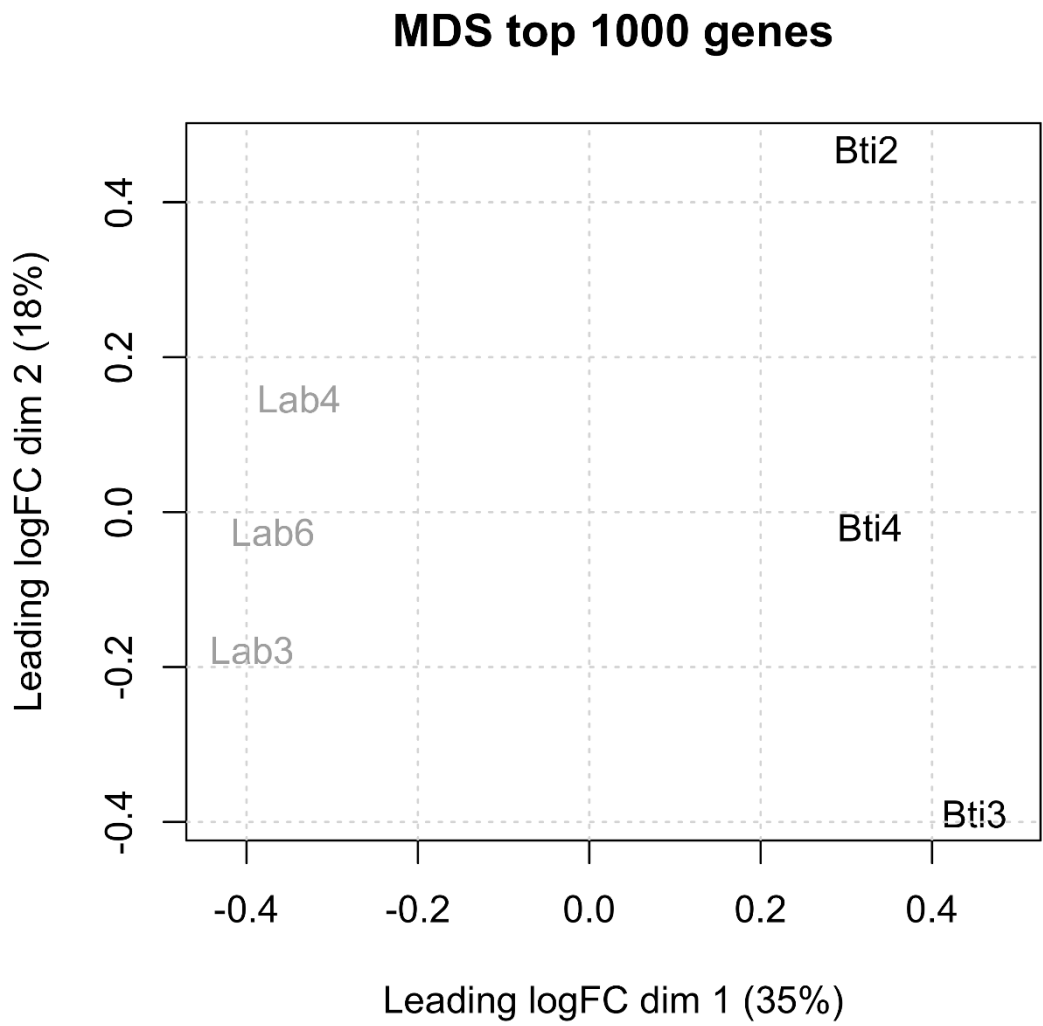

**Figure S1:** Multidimensional scaling plot of the gene expression profile by RNA-seq comparing the *Aedes aegypti* females from a strain exposed to *Bacillus thuringiensis* svar. *israelensis* (RecBti F<sub>35</sub>, black) and a reference strain (RecL, gray).



**Table S2:** Full dataset from RT-qPCR assays of genes from an *Aedes aegypti* strain continuously exposed to the larvicide *Bacillus thuringiensis* svar. *israelensis* (RecBti F<sub>30</sub>) compared to a reference strains (RecL). RNA pools of five females (heads) orally fed blood with ZIKV-infected (INF) and noninfected (NINF) were analyzed per strain, and two independent assays were analysed. Statistical difference of \* $p < 0.05$  or \* $p < 0.005$  according to Student's *t* test.

| Comparison    | Within strains     |                     | Between strains    |                    |
|---------------|--------------------|---------------------|--------------------|--------------------|
|               | RecL               | RecBti              | NINF               | INF                |
| Genes         | NINF X INF         | NINF X INF          | RecL x RecBti      | RecL x RecBti      |
| Hop           | 2.253              | 0.267               | 1.801              | 0.213              |
|               | 1.249              | 0.253               | 1.448              | 0.293              |
| Mean $\pm$ SD | 1.751 $\pm$ 0.709  | 0.260 $\pm$ 0.009*  | 1.624 $\pm$ 0.249  | 0.253 $\pm$ 0.056* |
| Domeless      | 5.426              | 0.131               | 2.616              | 0.063              |
|               | 2.324              | 0.135               | 2.720              | 0.135              |
| Mean $\pm$ SD | 3.875 $\pm$ 2.193  | 0.241 $\pm$ 0.003** | 2.668 $\pm$ 0.073* | 0.099 $\pm$ 0.050* |
| Relish 1      | 0.740              | 0.178               | 1.761              | 0.261              |
|               | 0.517              | 0.283               | 1.246              | 0.601              |
| Mean $\pm$ SD | 0.628 $\pm$ 0.158  | 0.230 $\pm$ 0.074*  | 1.503 $\pm$ 0.363  | 0.431 $\pm$ 0.240  |
| Cactus        | 0.681              | 0.423               | 1.402              | 1.595              |
|               | 0.254              | 0.182               | 1.666              | 2.200              |
| Mean $\pm$ SD | 0.467 $\pm$ 0.302  | 0.302 $\pm$ 0.170   | 1.534 $\pm$ 0.187  | 1.897 $\pm$ 0.428  |
| Defensin A    | 0.541              | TND <sup>a</sup>    | 0.370              | TND                |
|               | 0.492              | TND                 | 0.488              | TND                |
| Mean $\pm$ SD | 0.516 $\pm$ 0.035* | TND                 | 0.429 $\pm$ 0.083* | TND                |
| Cecropin G    | 2.068              | TND                 | 1.332              | TND                |
|               | 1.848              | TND                 | 0.506              | TND                |
| Mean $\pm$ SD | 1.958 $\pm$ 1.556  | TND                 | 0.919 $\pm$ 0.292  | TND                |
| Gambicin      | 1.819              | 0.722               | 1.504              | 0.601              |
|               | 0.540              | 0.134               | 1.252              | 0.281              |
| Mean $\pm$ SD | 1.179 $\pm$ 0.904  | 0.428 $\pm$ 0.416   | 1.378 $\pm$ 1.782  | 0.441 $\pm$ 0.226  |

<sup>a</sup>Transcripts not detected.

**Table S3:** Statistics for the RNA-seq libraries sequenced from *Aedes aegypti* females from a strain chronically exposed to *Bacillus thuringiensis* svar. *israelensis* (RecBti F<sub>35</sub>) compared to a reference strain (RecL).

| <b>Sample</b>         | <b>RecBti</b> |       | <b>RecL</b>   |       |
|-----------------------|---------------|-------|---------------|-------|
| Total reads           | 10.103.560    |       | 13.058.581    |       |
| Total base pairs      | 1.515.534.000 |       | 1.958.787.150 |       |
|                       | N. of reads   | %     | N. of reads   | %     |
| Total mapped          | 9.777.029     | 96.77 | 12.668.760    | 97.01 |
| Unique mapped         | 8.547.470     | 87.42 | 11.102.814    | 85.02 |
| Multiple mapped       | 1.229.559     | 12.58 | 1.565.946     | 11.99 |
| Unmapped              | 326.533       | 3.23  | 389.826       | 2.99  |
| Total mapped in genes | 8.144.728     | 95.29 | 10.589.297    | 95.37 |
| Total mapped no gene  | 402.742       | 4.71  | 51.3517       | 4.63  |

**Table S4.** Differentially expressed genes from an *Aedes aegypti* strain continuously exposed to the larvicide *Bacillus thuringiensis* svar. israelensis (RecBt F35) for the previous 34 generations, compared to a reference strains (RecL), analysed by EdgRe.

| Gene_id   | Description                                                      | logFC_edgeR          | PValue_edgeR         | FDR                  | KeggBiomart_id          | Kegg_id            | Blastpanotation                                      | blast2go_nr_NCBianotation                                                                 |
|-----------|------------------------------------------------------------------|----------------------|----------------------|----------------------|-------------------------|--------------------|------------------------------------------------------|-------------------------------------------------------------------------------------------|
| AAEL0279f | NA                                                               | -492.106.991.474.932 | 0.0250701728348245   | 0.258627500477641    | NA                      | NA                 | NA                                                   | NA                                                                                        |
| AAEL0038f | ubiquitin                                                        | -284.752.394.744.115 | 0.139217487232566    | 0.549112437854296    | NA                      | NA                 | ETN61806.1 ubiquitin                                 | XP_019543921.1 ubiquitin-like                                                             |
| AAEL0005f | uncharacterized LOC5564310                                       | -267.057.005.032.688 | 0.000155732767543407 | 0.00411330740050911  | NA                      | NA                 | KXJ79612.1 hypothei                                  | XP_021707947.1uncharacterized protein LOC5564310                                          |
| AAEL0256f | NA                                                               | -257.366.446.988.672 | 0.162373410840023    | 0.580707394694867    | NA                      | NA                 | NA                                                   | XP_019564322.1 adult cuticle protein 1                                                    |
| AAEL0082f | uncharacterized LOC5570373                                       | -235.411.250.638.448 | 0.000155732767543407 | 0.0150847676519414   | NA                      | NA                 | KXJ71287.1 hypothei                                  | XP_021708161.1uncharacterized protein LOC110678888                                        |
| AAEL0197f | NA                                                               | -186.072.594.570.043 | 0.000132954591027418 | 0.0135938682959367   | 00564 ; 04070 ; 00561   | aag01100 ; aag     | NA                                                   | XP_021697553.1diacylglycerol kinase 1 isoform X1                                          |
| AAEL0215f | NA                                                               | -179.721.748.099.443 | 5,99e+07             | 0.000344255096041256 | NA                      | NA                 | NA                                                   | XP_021706092.1uncharacterized protein LOC110678029                                        |
| AAEL0269f | NA                                                               | -178.147.270.162.833 | 3,37e+09             | 0.00499914174438099  | NA                      | NA                 | NA                                                   | NA                                                                                        |
| AAEL0149f | adult-specific cuticular protein ACP-20                          | -175.583.985.466.865 | 0.00244062783353945  | 0.0760003211995279   | NA                      | NA                 | NA                                                   | XP_001650153.1adult-specific cuticular protein ACP-20                                     |
| AAEL0204f | NA                                                               | -168.179.327.189.133 | 0.000356010976739148 | 0.0230705141405186   | NA                      | NA                 | NA                                                   | XP_021701632.1uncharacterized protein LOC110676785                                        |
| AAEL0057f | NADP-dependent malic enzyme                                      | -161.870.025.842.822 | 2,14e+04             | 9,86e+08             | aag01100 ; aag          | XP_019528944.1 PRE | XP_001651437.2NADP-dependent malic enzyme isoform X1 | XP_001651437.2NADP-dependent malic enzyme isoform X1                                      |
| AAEL0039f | calpain-3                                                        | -159.722.842.009.397 | 0.00233224522939274  | 0.0747232890974067   | NA                      | NA                 | KXJ72177.1 hypothei                                  | XP_019552586.1 calpain-B-like                                                             |
| AAEL0063f | 17-beta-hydroxysteroid dehydrogenase 13                          | -154.886.613.880.226 | 0.00040769093682104  | 0.0251783355746793   | NA                      | NA                 | KXJ71453.1 hypothei                                  | XP_001651887.117-beta-hydroxysteroid dehydrogenase 13                                     |
| AAEL0154f | cuticle protein 19                                               | -152.009.564.657.436 | 0.000162496677083983 | 0.01521039840659274  | NA                      | NA                 | NA                                                   | XP_001647747.1cuticle protein 19                                                          |
| AAEL0019f | acidic amino acid decarboxylase GADL1                            | -151.016.559.375.312 | 0.000665318678101746 | 0.0345890535361145   | NA                      | NA                 | KXJ68824.1 hypothei                                  | XP_001654195.2cysteine sulfinic acid decarboxylase isoform X1                             |
| AAEL0194f | NA                                                               | -14.752.327.099.114  | 2,34e+07             | 0.000278745599142822 | NA                      | aag04711           | NA                                                   | XP_021703089.1protein timeless isoform X9                                                 |
| AAEL0134f | alpha-amylase 2                                                  | -147.156.690.169.191 | 5,53e+09             | 0.00726721156045196  | 00500 ; 00500           | NA                 | NA                                                   | XP_001663616.1alpha-amylase 2                                                             |
| AAEL0219f | NA                                                               | -143.530.503.802.673 | 0.0324475508321646   | 0.28463170766102     | NA                      | NA                 | NA                                                   | XP_021703473.1skin secretory protein xP2-like                                             |
| AAEL0036f | sodium-dependent nutrient amino acid transporter 1               | -141.293.955.315.648 | 5,06e+07             | 0.000323434375000257 | NA                      | NA                 | NA                                                   | XP_021707062.1sodium-dependent nutrient amino acid transporter 1                          |
| AAEL0098f | metabotropic glutamate receptor 2                                | -141.148.738.588.305 | 0.00116610589115951  | 0.047691139601999    | NA                      | NA                 | NA                                                   | XP_021710165.1metabotropic glutamate receptor 2 isoform X1                                |
| AAEL0126f | uncharacterized LOC5576619                                       | -13.939.397.027.426  | 0.000351678566715284 | 0.0229513912830783   | NA                      | NA                 | KXJ80517.1 hypothei                                  | XP_001662773.1uncharacterized protein LOC5576619                                          |
| AAEL0042f | glutathione S-transferase theta-1                                | -13.785.661.407.891  | 0.0033881846154945   | 0.0897536781871071   | 00980 ; 00982 ; 00983 ; | aag01100 ; aag     | KXJ73112.1 hypothei                                  | XP_001648735.1glutathione S-transferase theta-1                                           |
| AAEL0056f | BTB/POZ domain-containing protein 6                              | -136.096.742.103.233 | 0.00812635536649933  | 0.145627738554632    | NA                      | NA                 | NA                                                   | XP_021695510.1BTB/POZ domain-containing protein 6 isoform X2                              |
| AAEL0061f | NA                                                               | -134.633.804.334.755 | 0.0491925680724099   | 0.352961636078127    | NA                      | NA                 | KXJ81607.1 hypothei                                  | XP_019529726.1 glutactin-like                                                             |
| AAEL0012f | transient receptor potential cation channel subfamily A member 1 | -133.901.978.422.926 | 0.00906143803733075  | 0.155276262233738    | NA                      | NA                 | NA                                                   | XP_021698453.1transient receptor potential cation channel subfamily A member 1 isoform X5 |
| AAEL0290f | NA                                                               | -133.192.201.749.977 | 0.0315010069405959   | 0.28423411888152     | NA                      | NA                 | NA                                                   | AHH41648.1cecropin N                                                                      |
| AAEL0079f | clavesin-1                                                       | -133.180.840.819.059 | 0.00233016768993799  | 0.0747232890974067   | NA                      | NA                 | KXJ72702.1 hypothei                                  | XP_019527170.1 clavesin-1-like                                                            |
| AAEL0043f | uncharacterized LOC5564692                                       | -132.368.894.889.437 | 0.00796379433443271  | 0.144528409372715    | NA                      | NA                 | KXJ70623.1 hypothei                                  | XP_021695521.1uncharacterized protein LOC5564692                                          |
| AAEL0101f | uncharacterized LOC5572926                                       | -131.058.405.987.192 | 1,86e+09             | 0.00335601152845418  | NA                      | NA                 | NA                                                   | XP_001654261.2uncharacterized protein LOC5572926                                          |
| AAEL0038f | defensin-A-like                                                  | -128.158.308.891.312 | 0.0764715373433454   | 0.422703978006619    | NA                      | NA                 | NA                                                   | AAD40113.1defensin isoform A2                                                             |
| AAEL0269f | NA                                                               | -127.546.443.470.566 | 0.112734157301008    | 0.503856556775916    | NA                      | NA                 | NA                                                   | XP_021702767.1zinc finger BED domain-containing protein 1-like                            |
| AAEL0197f | NA                                                               | -127.212.405.015.412 | 0.0384075226422404   | 0.309719436954163    | NA                      | NA                 | NA                                                   | XP_001661920.1venom allergen 5                                                            |
| AAEL0134f | uncharacterized LOC5577949                                       | -127.011.969.854.516 | 7,07e+06             | 0.000130083198070057 | NA                      | NA                 | NA                                                   | XP_001663622.2uncharacterized protein LOC5577949 isoform X2                               |
| AAEL0203f | NA                                                               | -126.578.736.473.677 | 1,94e+08             | 0.000656607599064131 | 00010 ; 00640 ; 00620 ; | aag01100 ; aag     | NA                                                   | XP_001655519.1 acetyl-coenzyme A synthetase                                               |
| AAEL0106f | MAP kinase phosphatase with leucine-rich repeats protein 1       | -126.361.979.141.786 | 3,70e+06             | 0.00011355946948025  | NA                      | NA                 | KXJ71180.1 hypothei                                  | XP_001660999.1MAP kinase phosphatase with leucine-rich repeats protein 1                  |
| AAEL0078f | protein EFR3 homolog cmp44E-like                                 | -12.635.207.646.004  | 0.000451121178145331 | 0.0273106386927193   | NA                      | NA                 | NA                                                   | XP_021708831.1protein EFR3 homolog cmp44E-like isoform X2                                 |
| AAEL0280f | NA                                                               | -121.025.784.843.701 | 0.00014196264559238  | 0.0138972367578096   | NA                      | aag01100 ; aag     | NA                                                   | XP_001656046.1alanine- glyoxylate aminotransferase 2-like                                 |
| AAEL0013f | 72 kDa inositol polyphosphate 5-phosphatase                      | -119.450.455.431.582 | 0.195463864000161    | 0.62802321107873     | NA                      | aag01100 ; aag     | XP_019554361.1 PRE                                   | XP_001653179.272 kDa inositol polyphosphate 5-phosphatase                                 |
| AAEL0063f | hybrid signal transduction histidine kinase B                    | -119.153.988.433.768 | 0.000186310878867899 | 0.0161778934654944   | NA                      | NA                 | ETN63671.1 hypothei                                  | XP_001651938.1hybrid signal transduction histidine kinase B                               |
| AAEL0212f | NA                                                               | -116.952.375.870.072 | 0.00114447394185131  | 0.0475020022701074   | NA                      | NA                 | NA                                                   | XP_019543697.1 60S ribosomal protein L7-like                                              |
| AAEL0089f | NA                                                               | -116.673.305.390.982 | 0.0133400810119755   | 0.18599306889727     | NA                      | NA                 | NA                                                   | XP_021705671.1CCR4-NOT transcription complex subunit 3-like                               |
| AAEL0221f | NA                                                               | -115.479.623.908.059 | 0.00866385905814469  | 0.150424209534052    | NA                      | NA                 | NA                                                   | XP_021700652.1thyrstimulin alpha-2 subunit                                                |
| AAEL0197f | NA                                                               | -115.290.257.318.542 | 0.0131632365425958   | 0.184874636813685    | NA                      | NA                 | NA                                                   | XP_001651766.1cytochrome c oxidase subunit 7A1, mitochondrial-like                        |
| AAEL0246f | NA                                                               | -115.060.779.717.934 | 0.011694440826392    | 0.173848585538685    | NA                      | NA                 | NA                                                   | NA                                                                                        |
| AAEL0135f | GDNF-inducible zinc finger protein 1                             | -114.633.077.490.041 | 0.012869169344141    | 0.182489812221969    | NA                      | NA                 | NA                                                   | XP_021697486.1GDNF-inducible zinc finger protein 1 isoform X2                             |
| AAEL0000f | phosphoenolpyruvate carboxykinase [GTP]                          | -112.956.962.237.196 | 2,50e+09             | 0.00411330740050911  | 00010 ; 00020 ; 00620   | aag01100 ; aag     | KXJ70379.1 hypothei                                  | XP_001647935.2phosphoenolpyruvate carboxykinase [GTP]                                     |
| AAEL0036f | serine protease easter                                           | -111.749.694.678.049 | 0.00339429254608925  | 0.0897536781871071   | NA                      | NA                 | XP_019541654.1 PRE                                   | XP_001657086.2serine protease easter                                                      |
| AAEL0257f | NA                                                               | -111.289.013.855.761 | 0.0145527133035641   | 0.193517439045371    | NA                      | NA                 | NA                                                   | XP_021694025.1tRNA-specific adenosine deaminase 2 isoform X6                              |
| AAEL0103f | GILT-like protein 3                                              | -110.585.152.098.339 | 0.00989389966343727  | 0.161167614967993    | NA                      | NA                 | NA                                                   | XP_001654520.1GILT-like protein 3                                                         |
| AAEL0260f | NA                                                               | -109.921.060.347.697 | 5,27e+07             | 0.000323434375000257 | NA                      | NA                 | NA                                                   | XP_021696765.1uncharacterized protein LOC110675610                                        |
| AAEL0251f | NA                                                               | -109.378.217.309.256 | 0.130446671430517    | 0.537318831917466    | NA                      | NA                 | NA                                                   | ---NA---                                                                                  |
| AAEL0048f | probable chitinase 10                                            | -10.632.965.017.141  | 0.0283545701452429   | 0.272927567444064    | 520                     | aag01100 ; aag     | KFB36184.1 AGAP00                                    | XP_021696877.1probable chitinase 10                                                       |
| AAEL0207f | NA                                                               | -105.744.095.265.038 | 1,30e+08             | 0.000531236704279967 | NA                      | NA                 | NA                                                   | XP_021697925.1uncharacterized protein LOC110676001                                        |
| AAEL0219f | NA                                                               | -104.655.096.431.623 | 0.00332640339630247  | 0.0895016492771208   | NA                      | NA                 | NA                                                   | XP_021711894.1neurofilament heavy polypeptide-like                                        |
| AAEL0006f | peptide methionine sulfoxide reductase                           | -104.531.119.006.958 | 1,28e+09             | 0.00244895569246464  | NA                      | NA                 | KFB50153.1 AGAP01                                    | XP_001649797.1peptide methionine sulfoxide reductase                                      |
| AAEL0145f | pancreatic lipase-related protein 2                              | -104.294.245.600.171 | 7,74e+07             | 0.00039983581196831  | NA                      | NA                 | NA                                                   | XP_021694874.1pancreatic lipase-related protein 2                                         |
| AAEL0034f | regulator of microtubule dynamics protein 1                      | -103.943.791.675.291 | 6,87e+08             | 0.00158071679752556  | NA                      | NA                 | KXJ75853.1 hypothei                                  | XP_001656801.1regulator of microtubule dynamics protein 1                                 |
| AAEL0032f | acyl-CoA Delta(11) desaturase                                    | -102.200.182.926.213 | 8,69e+07             | 0.00039983581196831  | NA                      | aag01100 ; aag     | XP_001864523.1 acy                                   | XP_021711176.1acyl-CoA Delta(11) desaturase isoform X1                                    |
| AAEL0204f | NA                                                               | -101.969.766.214.713 | 0.0005016770239264   | 0.0290898537620388   | NA                      | NA                 | NA                                                   | XP_021694055.1venom protease-like                                                         |
| AAEL0004f | tyrosine-protein kinase receptor torso                           | -101.051.775.669.785 | 0.162708509554998    | 0.581228146321853    | NA                      | aag04013           | XP_019539349.1 PRE                                   | XP_021699633.1tyrosine-protein kinase receptor torso isoform X2                           |
| AAEL0020f | uncharacterized LOC5573385                                       | -100.824.748.710.463 | 0.0115308499458727   | 0.173372577261871    | NA                      | NA                 | KXJ73009.1 hypothei                                  | XP_019547421.1 probable serine/threonine-protein kinase tsuA                              |
| AAEL0263f | NA                                                               | -100.816.572.642.697 | 0.290700804803279    | 0.722005075789413    | NA                      | NA                 | NA                                                   | XP_021703346.1adult cuticle protein 1-like                                                |
| AAEL0007f | ficollin-3-like                                                  | -100.612.656.450.163 | 0.0322775071150141   | 0.284499636467777    | NA                      | NA                 | AAV90674.1 angiopo                                   | ABF18025.1angiopoietin-like protein variant                                               |
| AAEL0268f | NA                                                               | -100.488.402.411.059 | 9,64e+08             | 0.00206366028950833  | NA                      | NA                 | NA                                                   | XP_021696766.1uncharacterized protein LOC110675611                                        |
| AAEL0124f | probable elastin-binding protein Ebps                            | -100.428.404.360.855 | 0.000272915387585317 | 0.0199314872742864   | NA                      | NA                 | XP_019932228.1 PRE                                   | ABF18171.1putative salivary mucin 6                                                       |
| AAEL0273f | NA                                                               | -100.417.735.594.873 | 0.000563253010873661 | 0.0312232181087918   | NA                      | NA                 | NA                                                   | NA                                                                                        |
| AAEL0205f | NA                                                               | -0.995419882563193   | 0.000515990241661443 | 0.029253144144659    | NA                      | NA                 | NA                                                   | XP_001661441.2pancreatic lipase-related protein 2                                         |
| AAEL0089f | uncharacterized LOC5571377                                       | -0.99212235141645    | 0.0193557649318294   | 0.226893947646744    | NA                      | NA                 | KXJ79893.1 hypothei                                  | XP_001659659.2uncharacterized protein LOC5571377                                          |
| AAEL0208f | NA                                                               | -0.99005425626586    | 0.0212830368621418   | 0.2382560890577      | NA                      | NA                 | NA                                                   | NA                                                                                        |
| AAEL0009f | proprotein convertase subtilisin/kexin type 5                    | -0.986657318607085   | 0.000220969156846934 | 0.0181549837616561   | NA                      | NA                 | KXJ74045.1 hypothei                                  | XP_021707974.1proprotein convertase subtilisin/kexin type 5                               |
| AAEL0039f | calpain-A                                                        | -0.981777718590641   | 0.000518176754572856 | 0.029253144144659    | NA                      | NA                 | KXJ72175.1 hypothei                                  | XP_021706015.1calpain-A isoform X1                                                        |
| AAEL0011f | fatty acid synthase                                              | -0.976857838284359   | 8,41e+07             | 0.00039983581196831  | 00780 ; 00061           | aag01100 ; aag     | KXJ76270.1 hypothei                                  | XP_001658180.2fatty acid synthase                                                         |
| AAEL0120f | uncharacterized LOC5575791                                       | -0.972172868945048   | 0.0120007149103345   | 0.176972081097594    | NA                      | NA                 | NA                                                   | XP_001662213.2uncharacterized protein LOC5575791                                          |
| AAEL0095f | glucose-6-phosphate 1-dehydrogenase                              | -0.97206531846485    | 1,35e+08             | 0.000531236704279967 | 00480 ; 00030           | aag01100 ; aag     | NA                                                   | XP_021704708.1glucose-6-phosphate 1-dehydrogenase isoform X1                              |
| AAEL0044f | uncharacterized LOC5564886                                       | -0.969777939029656   | 0.00554627084926411  | 0.119524085140347    | NA                      | NA                 | KXJ71041.1 hypothei                                  | XP_019562109.1 platelet glycoprotein Ib alpha chain-like                                  |
| AAEL0123f | cyclin-dependent kinase 2                                        | -0.958234654051533   | 0.02525439441847     | 0.259075173517489    | NA                      | NA                 | KXJ69159.1 hypothei                                  | XP_001662490.1cyclin-dependent kinase 2                                                   |
| AAEL0114f | clavesin-2                                                       | -0.957066587292822   | 9,60e+09             | 0.0110128080760421   | NA                      | NA                 | KXJ75161.1 hypothei                                  | XP_019527135.1 clavesin-1-like                                                            |
| AAEL0078f | cytochrome P450 4C1                                              | -0.954802514596368   | 0.00483888538577811  | 0.110216394356263    | NA                      | NA                 | KXJ78686.1 hypothei                                  | XP_001652922.1cytochrome P450 4C1                                                         |
| AAEL0036f | sodium-dependent nutrient amino acid transporter 1               | -0.944915915371567   | 9,23e+09             | 0.0110128080760421   | NA                      | NA                 | NA                                                   | XP_021705991.1sodium-dependent nutrient amino acid transporter 1                          |
| AAEL0106f | uncharacterized LOC5573655                                       | -0.94224127629007    | 0.000469583282083719 | 0.0280591257255479   | NA                      | NA                 | KXJ75680.1 hypothei                                  | XP_021709307.1uncharacterized protein LOC5573655                                          |

|                                                                                    |                     |                      |                      |                     |                                                                                                    |                                                                                                |
|------------------------------------------------------------------------------------|---------------------|----------------------|----------------------|---------------------|----------------------------------------------------------------------------------------------------|------------------------------------------------------------------------------------------------|
| AAEL0005 <sup>1</sup> uncharacterized LOC5564316                                   | -0.94046378092808   | 0.0280587601249555   | 0.271500221524543    | NA                  | NA                                                                                                 | XP_001848667.1 bea XP_001848667.1beat protein                                                  |
| AAEL0279 <sup>1</sup> NA                                                           | -0.93652860075636   | 0.0673166218042629   | 0.4007529665455      | NA                  | NA                                                                                                 | XP_021698969.1paternally-expressed gene 3 protein                                              |
| AAEL0114 <sup>1</sup> probable sulfoacetate transporter SauU                       | -0.935842069450981  | 2.86E+08             | 0.000877435471211908 | NA                  | NA                                                                                                 | KFB40807.1 AGAP00 XP_001865723.1cis,cis-muconate transport protein Muck                        |
| AAEL0064 <sup>1</sup> NA                                                           | -0.929652541174147  | 6.72E+06             | 0.000130083198070057 | NA                  | NA                                                                                                 | KXJ72000.1 hypothei XP_019530717.2 callisulfinakin                                             |
| AAEL0115 <sup>1</sup> serine protease snake                                        | -0.927006690042321  | 0.046558388033014    | 0.344268052476481    | NA                  | NA                                                                                                 | XP_001844337.1 vita XP_001661765.2serine protease snake                                        |
| AAEL0088 <sup>1</sup> selenide, water dikinase                                     | -0.924235786917341  | 2.78E+07             | 0.000278745599142822 | 450                 | aag01100; aag                                                                                      | KFB49604.1 AGAP00 XP_001653469.1selenide, water dikinase                                       |
| AAEL0069 <sup>1</sup> chymotrypsin-1                                               | -0.922237430579311  | 0.073739794128545    | 0.417913179290884    | NA                  | NA                                                                                                 | KXJ73565.1 hypothei XP_019532832.1 chymotrypsin-1-like                                         |
| AAEL0000 <sup>1</sup> phosphoenolpyruvate carboxykinase [GTP]                      | -0.918776867917819  | 0.00474541894422196  | 0.108625236628683    | 00010; 00020; 00620 | aag01100; aag                                                                                      | KXJ74853.1 hypothei XP_001647937.2phosphoenolpyruvate carboxykinase [GTP]                      |
| AAEL0173 <sup>1</sup> glycine-rich protein 23                                      | -0.914783229284762  | 0.399163123414693    | 0.798648539435638    | NA                  | NA                                                                                                 | XP_021493150.1glycine-rich protein 23                                                          |
| AAEL0076 <sup>1</sup> plant intracellular Ras-group-related LRR protein 7          | -0.911381543009482  | 0.0179420549824589   | 0.217240513090246    | NA                  | NA                                                                                                 | KXJ68680.1 hypothei XP_021711673.1plant intracellular Ras-group-related LRR protein 7          |
| AAEL0145 <sup>1</sup> NA                                                           | -0.910841849476223  | 0.0108806983510681   | 0.168274304681737    | NA                  | NA                                                                                                 | XP_001648916.2seminal metalloprotease 1                                                        |
| AAEL0172 <sup>1</sup> larval/pupal cuticle protein H1C                             | -0.910690258079843  | 6.00E+09             | 0.00756191347870889  | NA                  | NA                                                                                                 | XP_011493509.1larval/pupal cuticle protein H1C                                                 |
| AAEL0103 <sup>1</sup> UDP-glucuronosyltransferase 1-7                              | -0.910159584258336  | 1.17E+08             | 0.000511805769253077 | NA                  | NA                                                                                                 | XP_001654498.2UDP-glucuronosyltransferase 1-7                                                  |
| AAEL0208 <sup>1</sup> NA                                                           | -0.909026511845381  | 0.0284012574323965   | 0.272967995267809    | NA                  | NA                                                                                                 | XP_019540340.1 nephrin-like                                                                    |
| AAEL0058 <sup>1</sup> activator of 90 kDa heat shock protein ATPase homolog 1-like | -0.905929622209419  | 0.0114528988022704   | 0.172833431546296    | NA                  | NA                                                                                                 | KXJ68444.1 hypothei XP_021712254.1activator of 90 kDa heat shock protein ATPase homolog 1-like |
| AAEL0142 <sup>1</sup> UDP-glucuronosyltransferase 2B1                              | -0.904049464164703  | 3.65E+07             | 0.000305489628732982 | NA                  | aag01100; aag                                                                                      | XP_021696237.1UDP-glucuronosyltransferase isoform X1                                           |
| AAEL0070 <sup>1</sup> pyridoxal phosphate phosphatase                              | -0.901276103475141  | 4.17E+08             | 0.00580768352948965  | NA                  | aag00981                                                                                           | KXJ81040.1 hypothei XP_001658123.1pyridoxal phosphate phosphatase isoform X1                   |
| AAEL0044 <sup>1</sup> probable serine hydrolase                                    | -0.901150585722499  | 0.00280894497003887  | 0.0820568622767118   | NA                  | NA                                                                                                 | KXJ72299.1 hypothei XP_001649279.2probable serine hydrolase                                    |
| AAEL0183 <sup>1</sup> NA                                                           | -0.8987075692814    | 0.0325501037783737   | 0.28463170766102     | NA                  | NA                                                                                                 | XP_021700991.1sodium/potassium/calcium exchanger Nckx30C isoform X2                            |
| AAEL0227 <sup>1</sup> NA                                                           | -0.889446618711834  | 0.0497725936428855   | 0.355145369906322    | NA                  | NA                                                                                                 | XP_021698482.1uncharacterized transmembrane protein DDB_G0289901-like isoform X1               |
| AAEL0194 <sup>1</sup> NA                                                           | -0.888570461462982  | 0.00223636611939506  | 0.074201875706402    | NA                  | NA                                                                                                 | AAV21238.1lysozyme c-6                                                                         |
| AAEL0034 <sup>1</sup> maltase A3                                                   | -0.887408865968381  | 0.000104539801862617 | 0.0115990633342145   | NA                  | NA                                                                                                 | XP_001851486.1 alpi XP_001656785.2maltase A3                                                   |
| AAEL0050 <sup>1</sup> multidrug resistance-associated protein 1                    | -0.885768927728429  | 0.000505732569361893 | 0.0290898537620388   | NA                  | NA                                                                                                 | KXJ83954.1 hypothei XP_001650217.2multidrug resistance-associated protein 1 isoform X2         |
| AAEL0171 <sup>1</sup> uncharacterized LOC23687559                                  | -0.88397374097929   | 0.00112569625686237  | 0.04722490950323     | NA                  | NA                                                                                                 | KFB38856.1AGAP013348-like protein                                                              |
| AAEL0087 <sup>1</sup> F-box/SPRY domain-containing protein 1                       | -0.883705518412161  | 0.0514203578852335   | 0.359690131564899    | NA                  | NA                                                                                                 | KFB45932.1 AGAP01 XP_001659457.2F-box/SPRY domain-containing protein 1                         |
| AAEL0186 <sup>1</sup> NA                                                           | -0.883063744061782  | 0.502368871686883    | 0.858744381072989    | 190                 | aag01100; aag                                                                                      | YP_009389260.1NADH dehydrogenase subunit 2 (mitochondrion)                                     |
| AAEL0129 <sup>1</sup> protein D3                                                   | -0.877954948936346  | 3.31E+08             | 0.000951482456326449 | NA                  | NA                                                                                                 | XP_001663135.1protein D3                                                                       |
| AAEL0093 <sup>1</sup> solute carrier family 46 member 3                            | -0.852813283364671  | 0.0225068362058328   | 0.243943353081359    | NA                  | NA                                                                                                 | XP_001659917.1solute carrier family 46 member 3                                                |
| AAEL0048 <sup>1</sup> uncharacterized LOC5565490                                   | -0.851043021790185  | 0.0230025482021539   | 0.246091471282416    | NA                  | NA                                                                                                 | KFB47345.1 AGAP01 KFB47345.1AGAP010540-like protein                                            |
| AAEL0035 <sup>1</sup> transcription factor AP-1                                    | -0.848046598380842  | 5.11E+07             | 0.000323434375000257 | aag04013; aag       | XP_019536966.1 PRE XP_001663792.2transcription factor AP-1 isoform X2                              |                                                                                                |
| AAEL0044 <sup>1</sup> alpha-L-iduronidase                                          | -0.848002257449442  | 0.0457378146054671   | 0.340242012934121    | NA                  | aag01100; aag                                                                                      | KXJ74538.1 hypothei XP_019548444.1 alpha-L-iduronidase-like                                    |
| AAEL0042 <sup>1</sup> ATP-citrate synthase                                         | -0.845891293775601  | 7.71E+08             | 0.00168993348751206  | 00720; 00640; 00020 | aag01100; aag                                                                                      | XP_001842482.1 ATf XP_001648848.1ATP-citrate synthase isoform X2                               |
| AAEL0043 <sup>1</sup> esterase B1                                                  | -0.844647117603614  | 0.000101729274497351 | 0.0114160095600564   | NA                  | NA                                                                                                 | KXJ68275.1 hypothei XP_001648942.1esterase B1                                                  |
| AAEL0009 <sup>1</sup> fatty acyl-CoA reductase wat                                 | -0.843907970407149  | 0.0221404949187772   | 0.242070925206103    | 73                  | NA                                                                                                 | KXJ72100.1 hypothei XP_001651611.1fatty acyl-CoA reductase wat                                 |
| AAEL0012 <sup>1</sup> probable metabolite transport protein CsbC                   | -0.842914363147688  | 1.58E+09             | 0.00296561476447668  | NA                  | NA                                                                                                 | KXJ78750.1 hypothei XP_019542173.1 facilitated trehalose transporter Tret1-like                |
| AAEL0209 <sup>1</sup> NA                                                           | -0.841008547426526  | 0.0103424490440876   | 0.163805879696547    | NA                  | NA                                                                                                 | NA                                                                                             |
| AAEL0083 <sup>1</sup> ATP-binding cassette sub-family A member 3                   | -0.836569036874643  | 0.0122710541138635   | 0.179285423221345    | NA                  | NA                                                                                                 | XP_001851801.1 ATf XP_021709756.1ATP-binding cassette sub-family A member 3 isoform X1         |
| AAEL0200 <sup>1</sup> NA                                                           | -0.835894012259378  | 0.0945376396456515   | 0.465640264332134    | NA                  | NA                                                                                                 | ---NA---                                                                                       |
| AAEL0222 <sup>1</sup> NA                                                           | -0.835459562886397  | 0.0303120259457684   | 0.280995099606986    | aag04080            | NA                                                                                                 | XP_021704405.1histamine H2 receptor                                                            |
| AAEL0181 <sup>1</sup> NA                                                           | -0.834945894463772  | 0.02968417842625     | 0.278209491466411    | NA                  | NA                                                                                                 | XP_021706157.1voltage-dependent T-type calcium channel subunit alpha-1G isoform X3             |
| AAEL0038 <sup>1</sup> defensin-C                                                   | -0.828293247785244  | 0.094487631338425    | 0.465640264332134    | NA                  | NA                                                                                                 | KXJ76862.1 hypothei AAD40116.2defensin isoform C1                                              |
| AAEL0257 <sup>1</sup> NA                                                           | -0.824395893910884  | 0.0319046734058026   | 0.284442054201394    | NA                  | NA                                                                                                 | XP_021696581.1uncharacterized protein LOC110675564                                             |
| AAEL0007 <sup>1</sup> fibrinogen-like protein A                                    | -0.823682720130574  | 0.000569459030366809 | 0.0313581563638191   | NA                  | NA                                                                                                 | KXJ79468.1 hypothei XP_001650669.1fibrinogen-like protein A                                    |
| AAEL0037 <sup>1</sup> uncharacterized LOC578921                                    | -0.822537330041396  | 3.46E+08             | 0.000965310188524951 | NA                  | NA                                                                                                 | KXJ75767.1 hypothei XP_019526410.1 neurofilament medium polypeptide-like                       |
| AAEL0103 <sup>1</sup> gastrula zinc finger protein XICGF48.2                       | -0.821624256221337  | 0.00095222703617745  | 0.0425356957217985   | NA                  | NA                                                                                                 | XP_001654447.1gastrula zinc finger protein XICGF48.2                                           |
| AAEL0026 <sup>1</sup> 72 kDa type IV collagenase                                   | -0.821570765171952  | 0.00335006832654969  | 0.0896143277352042   | NA                  | NA                                                                                                 | KXJ68268.1 hypothei XP_001662052.172 kDa type IV collagenase                                   |
| AAEL0127 <sup>1</sup> mucin-17                                                     | -0.818066396475101  | 0.00695042414736882  | 0.137411930736898    | NA                  | XP_019553095.1 PRE XP_021710732.1mucin-SAC isoform X2                                              |                                                                                                |
| AAEL0124 <sup>1</sup> organic cation transporter protein                           | -0.815356603006453  | 0.00191429823636787  | 0.0684803907362971   | NA                  | NA                                                                                                 | KXJ76179.1 hypothei XP_001662579.2organic cation transporter protein                           |
| AAEL0198 <sup>1</sup> NA                                                           | -0.813733718600699  | 2.00E+07             | 0.000656607599064131 | NA                  | NA                                                                                                 | XP_021695644.1uncharacterized protein LOC5572540                                               |
| AAEL0124 <sup>1</sup> probable 4-coumarate--CoA ligase 1                           | -0.813485515679697  | 0.0211099599616659   | 0.23689494093567     | NA                  | NA                                                                                                 | XP_019525713.1 PRE XP_001662564.24-coumarate--CoA ligase-like 9                                |
| AAEL0274 <sup>1</sup> NA                                                           | -0.813010302284996  | 0.0876326950502832   | 0.452523041443718    | NA                  | NA                                                                                                 | XP_021703451.1netrin-B isoform X1                                                              |
| AAEL0236 <sup>1</sup> NA                                                           | -0.812473709331699  | 0.0628609790288642   | 0.391901577929274    | NA                  | NA                                                                                                 | XP_019556495.1 mucin-SAC-like                                                                  |
| AAEL0206 <sup>1</sup> NA                                                           | -0.81108103652339   | 0.0196757467920266   | 0.227335564593981    | NA                  | NA                                                                                                 | XP_021703888.1zinc finger protein ush                                                          |
| AAEL0212 <sup>1</sup> NA                                                           | -0.806942766964415  | 0.000800874391460909 | 0.038584534817923    | NA                  | NA                                                                                                 | ABF18036.1gSg-8like protein                                                                    |
| AAEL0008 <sup>1</sup> probable G-protein coupled receptor Mth-like 14              | -0.806520708547848  | 0.000579905132266155 | 0.0315756628823264   | NA                  | NA                                                                                                 | KXJ81441.1 hypothei XP_001651304.3probable G-protein coupled receptor Mth-like 14              |
| AAEL0066 <sup>1</sup> fibrinogen-like protein 1                                    | -0.805961329835862  | 5.03E+08             | 0.00132206091337758  | NA                  | NA                                                                                                 | XP_019539661.1 PRE XP_001657949.2fibrinogen-like protein 1                                     |
| AAEL0270 <sup>1</sup> NA                                                           | -0.804303690108387  | 2.81E+08             | 0.00445101312117406  | NA                  | NA                                                                                                 | ---NA---                                                                                       |
| AAEL0279 <sup>1</sup> NA                                                           | -0.803577529623324  | 0.00763184153390241  | 0.142450721693651    | NA                  | NA                                                                                                 | NA                                                                                             |
| AAEL0248 <sup>1</sup> NA                                                           | -0.79977447492361   | 0.08536692395981     | 0.443811544789927    | NA                  | NA                                                                                                 | NA                                                                                             |
| AAEL0242 <sup>1</sup> NA                                                           | -0.799604329758633  | 0.00175976278441776  | 0.0640052851470837   | NA                  | NA                                                                                                 | XP_001659917.1solute carrier family 46 member 3                                                |
| AAEL0066 <sup>1</sup> uncharacterized LOC5568174                                   | -0.799503412346585  | 0.0037765020138555   | 0.0954708009107098   | 901                 | NA                                                                                                 | KXJ68636.1 hypothei XP_021703903.1uncharacterized protein LOC5568174 isoform X1                |
| AAEL0183 <sup>1</sup> NA                                                           | -0.798139963953808  | 0.00905027863715604  | 0.0413193578047436   | NA                  | NA                                                                                                 | XP_021702546.1uncharacterized protein LOC5566796                                               |
| AAEL0194 <sup>1</sup> NA                                                           | -0.796713471816883  | 0.0136126395578813   | 0.187831676988403    | NA                  | NA                                                                                                 | XP_021711444.1uncharacterized protein LOC5565987 isoform X7                                    |
| AAEL0115 <sup>1</sup> condensin-2 complex subunit D3                               | -0.795108254453843  | 0.0128378500426682   | 0.182489812221969    | NA                  | NA                                                                                                 | KXJ81720.1 hypothei XP_021711057.1condensin-2 complex subunit D3                               |
| AAEL0061 <sup>1</sup> melanization protease 1                                      | -0.794893123720075  | 0.00205508437737934  | 0.0710935580475365   | NA                  | NA                                                                                                 | XP_019551990.1 PRE XP_001657551.2melanization protease 1                                       |
| AAEL0010 <sup>1</sup> uncharacterized LOC5579916                                   | -0.789388652981171  | 0.0635010118174791   | 0.393227665373111    | NA                  | XP_019528949.1 PRE XP_019528950.1 constitutive coactivator of PPAR-gamma-like protein 1 isoform X2 |                                                                                                |
| AAEL0098 <sup>1</sup> uncharacterized LOC5572540                                   | -0.7879176685927246 | 0.0023374228498388   | 0.0747232890974067   | 00564; 00591; 00565 | NA                                                                                                 | XP_001660476.2uncharacterized protein LOC5572540                                               |
| AAEL0016 <sup>1</sup> zinc finger protein ubi-d4                                   | -0.787616501537257  | 0.0405339788074493   | 0.316225178415075    | NA                  | NA                                                                                                 | XP_019543335.1 PRE XP_001659759.2zinc finger protein ubi-d4                                    |
| AAEL0129 <sup>1</sup> transferrin                                                  | -0.787004973215819  | 0.0173652489731798   | 0.214247748888425    | NA                  | NA                                                                                                 | XP_019555266.1 transferrin-like                                                                |
| AAEL0112 <sup>1</sup> protein D3                                                   | -0.7864336095592    | 0.00265238980759574  | 0.0792437883464128   | NA                  | XP_001850222.1 phc XP_001661541.1protein D3                                                        |                                                                                                |
| AAEL0077 <sup>1</sup> potassium voltage-gated channel subfamily H member 8         | -0.786367112506735  | 0.0053858002684943   | 0.117391234454011    | NA                  | NA                                                                                                 | XP_021699749.1potassium voltage-gated channel subfamily H member 8 isoform X2                  |
| AAEL0059 <sup>1</sup> putative tricarboxylate transport protein, mitochondrial     | -0.784536298719288  | 3.65E+08             | 0.000988185298028416 | NA                  | ETN58853.1 tricarbo                                                                                | XP_001657348.1putative tricarboxylate transport protein, mitochondrial                         |
| AAEL0014 <sup>1</sup> neurotrophin 1                                               | -0.782979839597241  | 0.059535679978379    | 0.382389109224341    | NA                  | NA                                                                                                 | KXJ73752.1 hypothei XP_001659184.2neurotrophin 1                                               |
| AAEL0207 <sup>1</sup> NA                                                           | -0.78265505962126   | 0.0284620008666793   | 0.273104621544831    | NA                  | NA                                                                                                 | XP_021701990.1probable palmitoyltransferase ZDHHC24                                            |
| AAEL0205 <sup>1</sup> NA                                                           | -0.782261201776684  | 0.0016695541480016   | 0.0152111375514763   | NA                  | NA                                                                                                 | XP_021697452.1integral membrane protein GPR155                                                 |
| AAEL0063 <sup>1</sup> MAM and LDL-receptor class A domain-containing protein 1     | -0.780657072637201  | 0.0176010910946993   | 0.214955509175633    | NA                  | NA                                                                                                 | KXJ82331.1 hypothei XP_001651940.1MAM and LDL-receptor class A domain-containing protein 1     |
| AAEL0257 <sup>1</sup> NA                                                           | -0.780061969040769  | 0.000161206004390615 | 0.0151039840659274   | NA                  | NA                                                                                                 | XP_021704240.1microfibril-associated glycoprotein 4-like                                       |
| AAEL0170 <sup>1</sup> RYamide receptor                                             | -0.779448420102396  | 0.112969473879102    | 0.503928507434265    | NA                  | NA                                                                                                 | XP_021696098.1RYamide receptor                                                                 |
| AAEL0059 <sup>1</sup> phospholipase B1, membrane-associated                        | -0.778605880610186  | 0.009882218698503    | 0.161167614967993    | 00564; 00591; 00565 | NA                                                                                                 | KXJ79591.1 hypothei XP_001651743.2phospholipase B1, membrane-associated                        |
| AAEL0183 <sup>1</sup> NA                                                           | -0.77734505335678   | 0.00224730239405084  | 0.0743873260073952   | NA                  | NA                                                                                                 | XP_021710995.1regulating synaptic membrane exocytosis protein 1 isoform X1                     |
| AAEL0205 <sup>1</sup> NA                                                           | -0.774820981092964  | 0.000572502746046687 | 0.0313581563638191   | NA                  | NA                                                                                                 | XP_021696179.1biofilm and cell wall regulator 1-like                                           |
| AAEL0232 <sup>1</sup> NA                                                           | -0.7747225894343676 | 0.046838685216522    | 0.33483791379173     | NA                  | NA                                                                                                 | XP_021703923.1zinc finger protein 135 isoform X2                                               |

|                                                                     |                     |                      |                     |               |                |                                                    |                                                                                                                |
|---------------------------------------------------------------------|---------------------|----------------------|---------------------|---------------|----------------|----------------------------------------------------|----------------------------------------------------------------------------------------------------------------|
| AAEL0069f uncharacterized LOC5568619                                | -0.773338717935802  | 0.0267289258726645   | 0.266963842267995   | NA            | NA             | KFB35774.1 hypothe                                 | XP_001652453.1uncharacterized protein LOC5568619                                                               |
| AAEL0019f actin, indirect flight muscle                             | -0.773075036146474  | 0.0105022113881816   | 0.165036735008546   | NA            | aag04145 ; aag | KFB42600.1 AGAPO0                                  | XP_001654312.1actin, indirect flight muscle                                                                    |
| AAEL0039f uncharacterized LOC5563775                                | -0.772866294936156  | 0.0228022581727474   | 0.245124275357034   | NA            | NA             | KXJ74511.1 hypothe                                 | XP_001648054.1uncharacterized protein LOC5563775                                                               |
| AAEL0010f myosin regulatory light chain, striated adductor muscle   | -0.771496902300265  | 0.0543523398756312   | 0.367469712613638   | NA            | NA             | ETN60400.1 myosin I                                | XP_001658012.1myosin regulatory light chain, striated adductor muscle                                          |
| AAEL0050f uncharacterized LOC5565847                                | -0.7706186238171553 | 0.0481697336101821   | 0.349572467413955   | NA            | NA             | NA                                                 | XP_001650199.1uncharacterized protein LOC5565847                                                               |
| AAEL1095f NA                                                        | -0.767136850579432  | 0.0835323866158979   | 0.438667571938958   | NA            | NA             | NA                                                 | XP_021706588.1 solute carrier family 26 member 10-like                                                         |
| AAEL0275f NA                                                        | -0.766964259552864  | 0.005007123133538    | 0.112922895714546   | NA            | NA             | NA                                                 | XP_021697289.1nose resistant to fluoxetine protein 6                                                           |
| AAEL0266f NA                                                        | -0.766615607046891  | 0.00765105274652191  | 0.142520217355252   | NA            | NA             | NA                                                 | XP_021695165.1transient receptor potential cation channel protein painless isoform X1                          |
| AAEL0026f SPRY domain-containing SOCS box protein 3                 | -0.766302829600296  | 0.0012456448223946   | 0.049406998518408   | NA            | NA             | KFB41674.1 hypothe                                 | XP_001655691.1SPRY domain-containing SOCS box protein 3                                                        |
| AAEL0139f uncharacterized LOC5579043                                | -0.76257499995724   | 1.39E+08             | 0.00053123670479967 | NA            | NA             | NA                                                 | XP_001657236.2uncharacterized protein LOC5579043                                                               |
| AAEL0223f NA                                                        | -0.7622011166643912 | 0.0902513029466064   | 0.458582269306832   | NA            | NA             | NA                                                 | XP_021703551.1tyrosine-protein phosphatase non-receptor type 23                                                |
| AAEL0203f NA                                                        | -0.761802629409377  | 0.00351088588221991  | 0.0907504828319877  | NA            | NA             | NA                                                 | XP_021712674.1protein NPC2 homolog                                                                             |
| AAEL0201f NA                                                        | -0.760618670241926  | 0.0190360328816311   | 0.225171411092632   | NA            | NA             | NA                                                 | XP_021711960.1SAM50-like protein CG7639                                                                        |
| AAEL0227f NA                                                        | -0.759004886580877  | 0.0646316875141073   | 0.39649385900321    | NA            | NA             | NA                                                 | XP_021700695.1ADAMTS-like protein 1 isoform X3                                                                 |
| AAEL0012f clavesin-1                                                | -0.755600612491062  | 0.00252307297717641  | 0.0776498914246733  | NA            | NA             | NA                                                 | AAK73352.1CRALBP isoform 2                                                                                     |
| AAEL0212f NA                                                        | -0.750771777640689  | 0.0330015213175165   | 0.285413533048672   | NA            | NA             | NA                                                 | NA                                                                                                             |
| AAEL0101f leucokinins                                               | -0.747890945500024  | 0.0808870826499014   | 0.433079891352508   | NA            | NA             | NA                                                 | OQ2036.1RecName: Full=Leucokinins; Contains: RecName: Full=Leucokinin-1; Contains: RecName: Full=Leucokinin-3; |
| AAEL0265f NA                                                        | -0.74711943159431   | 0.125221782078145    | 0.530276501925028   | NA            | NA             | NA                                                 | NA                                                                                                             |
| AAEL0135f uncharacterized LOC5578233                                | -0.744891643169221  | 0.000108557253837273 | 0.0117522805860069  | NA            | NA             | NA                                                 | XP_001663757.1uncharacterized protein LOC5578233                                                               |
| AAEL0018f sodium-coupled monocarboxylate transporter 1              | -0.744829140047698  | 0.001790371135107663 | 0.0648621935929416  | NA            | NA             | KXJ68697.1 hypothe                                 | XP_001660396.2sodium-coupled monocarboxylate transporter 1                                                     |
| AAEL0272f NA                                                        | -0.744604713374996  | 0.022363557832905    | 0.242962761721832   | NA            | NA             | NA                                                 | XP_021694815.1cartilage oligomeric matrix protein-like                                                         |
| AAEL0270f NA                                                        | -0.742895978237507  | 0.057110274207189    | 0.375057077651547   | NA            | NA             | NA                                                 | XP_019530408.1 PHD finger protein rhinoceros-like isoform X2                                                   |
| AAEL0262f NA                                                        | -0.741953061268369  | 5.10E+09             | 0.00680489671107962 | NA            | NA             | NA                                                 | XP_021706226.1protein takeout isoform X1                                                                       |
| AAEL0216f NA                                                        | -0.739963083082439  | 0.042320847802709    | 0.323939778330243   | NA            | NA             | NA                                                 | NA                                                                                                             |
| AAEL0049f neuronal acetylcholine receptor subunit beta-3            | -0.739235670107838  | 0.0277163506303136   | 0.271096286901832   | NA            | NA             | KXJ76019.1 hypothe                                 | XP_001650051.2neuronal acetylcholine receptor subunit beta-3                                                   |
| AAEL0264f NA                                                        | -0.73877569880214   | 0.0136900142449281   | 0.1878316769888403  | NA            | NA             | NA                                                 | XP_021700252.1uncharacterized protein LOC5575879 isoform X2                                                    |
| AAEL0246f NA                                                        | -0.737834237443612  | 0.0043645083921241   | 0.103594442242845   | NA            | NA             | NA                                                 | XP_021702234.1pupal cuticle protein 20                                                                         |
| AAEL0097f protein msta                                              | -0.735599211006605  | 0.00528544281625891  | 0.116209032387834   | NA            | NA             | NA                                                 | XP_001660316.1protein msta isoform X1                                                                          |
| AAEL0091f beta-1,3-glucan-binding protein                           | -0.735559608886772  | 0.00795729330877275  | 0.144528409372715   | NA            | NA             | KXJ79664.1 hypothe                                 | XP_001659797.2beta-1,3-glucan-binding protein                                                                  |
| AAEL0219f NA                                                        | -0.735257232549155  | 0.0724917876160855   | 0.413814782657084   | NA            | NA             | NA                                                 | XP_021702720.1ushu, von Willebrand factor type A, EGF and pentraxin domain-containing protein 1                |
| AAEL0206f NA                                                        | -0.735189792960008  | 0.020074073686658    | 0.229753266249536   | NA            | NA             | NA                                                 | XP_019542173.1 facilitated trehalose transporter Tret1-like                                                    |
| AAEL0063f sulfotransferase family cytosolic 18 member 1             | -0.734532783516921  | 0.0442937047923951   | 0.332998914623873   | NA            | NA             | KXJ69441.1 hypothe                                 | XP_021710674.1sulfotransferase family cytosolic 18 member 1                                                    |
| AAEL0032f larval cuticle protein LCP-30                             | -0.734178014556904  | 3.05E+09             | 0.00475732094034817 | NA            | NA             | KXJ76682.1 hypothe                                 | XP_011492990.2larval cuticle protein LCP-30                                                                    |
| AAEL0226f NA                                                        | -0.732876755772639  | 5.10E+09             | 0.00680489671107962 | NA            | NA             | NA                                                 | XP_021711922.1LOW QUALITY PROTEIN: uncharacterized protein LOC110674016                                        |
| AAEL0067f BCL2/adenovirus E1B 19 kDa protein-interacting protein 3  | -0.732778587659755  | 6.63E+08             | 0.00156538082998626 | NA            | aag04140 ; aag | XP_019525149.1 PRE                                 | XP_001657980.1BCL2/adenovirus E1B 19 kDa protein-interacting protein 3 isoform X2                              |
| AAEL0074f cartilage oligomeric matrix protein                       | -0.729831161266828  | 0.00426335971916707  | 0.101899834118897   | NA            | NA             | XP_001866775.1 thr                                 | XP_021698876.1cartilage oligomeric matrix protein                                                              |
| AAEL0198f NA                                                        | -0.729117035997825  | 0.00943835660074098  | 0.158773875613038   | NA            | aag04320       | NA                                                 | XP_021693473.1cytoplasmic polyadenylation element-binding protein 2                                            |
| AAEL0077f 39S ribosomal protein L40, mitochondrial-like             | -0.727683076974983  | 0.00799609757036293  | 0.144528409372715   | NA            | NA             | KXJ71920.1 hypothe                                 | XP_001658631.239S ribosomal protein L40, mitochondrial                                                         |
| AAEL0086f uncharacterized LOC5570944                                | -0.727465379837883  | 0.0229188912984717   | 0.245803773576383   | NA            | NA             | KXJ81659.1 hypothe                                 | XP_021699203.1uncharacterized protein LOC5570944                                                               |
| AAEL0035f L-threonine ammonia-lyase                                 | -0.72712945843198   | 0.025781722659188    | 0.262052657185525   | NA            | NA             | KXJ72210.1 hypothe                                 | XP_001663948.2uncharacterized protein LOC5578556                                                               |
| AAEL0070f lipase member H                                           | -0.726195841194431  | 4.08E+09             | 0.00577271140867643 | NA            | NA             | XP_001845804.1 par                                 | XP_001652526.1lipase member H                                                                                  |
| AAEL0195f NA                                                        | -0.722725244189785  | 0.00979471301773438  | 0.160948123552128   | NA            | NA             | NA                                                 | XP_021698987.1guanine nucleotide-binding protein G(f) subunit alpha                                            |
| AAEL0135f zinc finger protein 2 homolog                             | -0.722686731423774  | 0.067371125255702    | 0.4007529665455     | NA            | NA             | NA                                                 | XP_021696078.1zinc finger protein 2 homolog                                                                    |
| AAEL0146f cytochrome P450 9e2                                       | -0.721923826879402  | 0.000263650028683666 | 0.0195653835002185  | NA            | NA             | NA                                                 | XP_001649095.1cytochrome P450 9e2                                                                              |
| AAEL0015f monocarboxylate transporter 12                            | -0.72130020468357   | 0.0631204631930171   | 0.39272109689124    | NA            | NA             | XP_001842007.1 mo                                  | XP_001653584.2monocarboxylate transporter 12                                                                   |
| AAEL0036f sodium-dependent nutrient amino acid transporter 1        | -0.719767251022711  | 0.0316496704018788   | 0.28423411888152    | NA            | NA             | NA                                                 | XP_021710856.1sodium-dependent nutrient amino acid transporter 1                                               |
| AAEL0103f esterase B1                                               | -0.719331108834029  | 0.0250283006884006   | 0.258627500477641   | NA            | NA             | NA                                                 | XP_001654509.1esterase B1                                                                                      |
| AAEL0113f nuclear factor of activated T-cells 5                     | -0.718961661683409  | 0.00954541918278973  | 0.158773875613038   | NA            | NA             | NA                                                 | XP_021694711.1nuclear factor of activated T-cells 5 isoform X1                                                 |
| AAEL0257f NA                                                        | -0.718656872513166  | 0.0418759474664839   | 0.323199464702074   | NA            | NA             | NA                                                 | NA                                                                                                             |
| AAEL0174f angiotensin-converting enzyme                             | -0.717622247733494  | 0.00456414658383662  | 0.105525821267499   | NA            | NA             | NA                                                 | XP_011493088.2angiotensin-converting enzyme                                                                    |
| AAEL0266f NA                                                        | -0.7174004547436334 | 0.20481060103304     | 0.637782699712521   | NA            | NA             | NA                                                 | NA                                                                                                             |
| AAEL0058f UDP-glucuronosyltransferase 2B15                          | -0.716874102712033  | 0.000115595644311885 | 0.0119407339413717  | NA            | NA             | KXJ77283.1 hypothe                                 | XP_001651580.2UDP-glucuronosyltransferase 2B15                                                                 |
| AAEL0087f inositol oxygenase                                        | -0.714965009914049  | 0.000318647246516123 | 0.0218820295704579  | 00053 ; 00562 | aag01100 ; aag | KXJ77859.1 hypothe                                 | XP_021706632.1inositol oxygenase                                                                               |
| AAEL0090f probable cytochrome P450 6a14                             | -0.714494250336343  | 0.000244675076668022 | 0.0191849588638347  | NA            | NA             | KXJ79383.1 hypothe                                 | XP_001659661.2probable cytochrome P450 6a14                                                                    |
| AAEL0084f cadherin-99C                                              | -0.712760248966317  | 0.0741592401311024   | 0.418818002133309   | NA            | NA             | KXJ68278.1 hypothe                                 | XP_019525112.1 protocadherin-15-like                                                                           |
| AAEL0005f perleucan                                                 | -0.712608399249929  | 0.000302978186070401 | 0.021174026428904   | NA            | NA             | AAV90641.1 putative                                | ABF18034.1putative salivary C-type lectin                                                                      |
| AAEL0067f alpha-amylase I                                           | -0.710628740606159  | 0.00678349822796267  | 0.13569945802981    | 00500 ; 00500 | aag01100 ; aag | KXJ83067.1 hypothe                                 | XP_001652172.1alpha-amylase I                                                                                  |
| AAEL0258f NA                                                        | -0.70984109547304   | 0.0336457382527593   | 0.288275682869545   | NA            | NA             | XP_021708085.1uncharacterized protein LOC110678861 | XP_021708085.1uncharacterized protein LOC110678861                                                             |
| AAEL0028f CCAAT/enhancer-binding protein                            | -0.70699455759465   | 0.00115115697742164  | 0.0475020022701074  | NA            | NA             | KXJ80566.1 hypothe                                 | XP_021705485.1CCAAT/enhancer-binding protein                                                                   |
| AAEL0056f ejaculatory bulb-specific protein 3                       | -0.706559579789831  | 0.0220895626181706   | 0.242070925206103   | NA            | NA             | KXJ81186.1 hypothe                                 | XP_001651339.2ornithine decarboxylase isoform X1                                                               |
| AAEL0006f beta-1,3-glucan-binding protein 2                         | -0.706217745127556  | 0.0759618222116222   | 0.421847126126341   | NA            | aag04624       | ETN63242.1 Gram ne                                 | XP_021710530.1beta-1,3-glucan-binding protein 2                                                                |
| AAEL0084f 26S proteasome non-ATPase regulatory subunit 10           | -0.704591009081376  | 0.0501806767243743   | 0.356468207181388   | NA            | NA             | KXJ72846.1 hypothe                                 | XP_001653259.226S proteasome non-ATPase regulatory subunit 10                                                  |
| AAEL0085f acetylcholinesterase                                      | -0.703006288739714  | 0.054824010670589    | 0.367972681393698   | NA            | NA             | KXJ80906.1 hypothe                                 | XP_019548135.1 juvenile hormone esterase-like                                                                  |
| AAEL0031f uncharacterized LOC5577223                                | -0.70299366593377   | 0.104323668095631    | 0.4877550225401725  | NA            | NA             | NA                                                 | XP_021708067.1uncharacterized protein LOC5577223                                                               |
| AAEL0218f NA                                                        | -0.698546188710371  | 0.0806648047615918   | 0.144976080745345   | NA            | NA             | NA                                                 | NA                                                                                                             |
| AAEL0211f NA                                                        | -0.69648090492471   | 0.0123342178402451   | 0.17950488805347    | NA            | NA             | NA                                                 | KFB48573.1AGAPO05783-like protein                                                                              |
| AAEL0144f cuticle protein CP14.6                                    | -0.69372014745882   | 0.00416070364047616  | 0.100227217179219   | NA            | NA             | NA                                                 | XP_021702230.1cuticle protein CP14.6                                                                           |
| AAEL0040f uncharacterized LOC5564061                                | -0.691406271855806  | 0.00944811836715776  | 0.158773875613038   | NA            | NA             | XP_001869600.1 con                                 | XP_001648364.2uncharacterized protein LOC5564061                                                               |
| AAEL0017f protein pinocchio                                         | -0.689916945110019  | 5.79E+08             | 0.00147879697348873 | NA            | NA             | XP_019550483.1 PRE                                 | XP_001652547.1protein pinocchio isoform X2                                                                     |
| AAEL0221f NA                                                        | -0.688925136344593  | 0.0334644900063795   | 0.287794614054863   | NA            | NA             | NA                                                 | XP_021708318.1pancreatic lipase-related protein 2                                                              |
| AAEL0133f integumentary mucin C.1                                   | -0.688122366855238  | 0.055479976468126    | 0.370725518234274   | NA            | NA             | NA                                                 | XP_021698056.1integumentary mucin C.1                                                                          |
| AAEL0207f NA                                                        | -0.688046363998973  | 0.000140646616130955 | 0.0138972367578096  | NA            | NA             | NA                                                 | KFB38955.1AGAPO00420-like protein                                                                              |
| AAEL0262f protein toll                                              | -0.686854881284731  | 0.00323643324334062  | 0.0889935739723594  | NA            | aag04624       | NA                                                 | XP_021708718.1protein toll                                                                                     |
| AAEL0145f integrator complex subunit 14                             | -0.686486947877929  | 0.0170046791453244   | 0.21168364694759    | NA            | NA             | NA                                                 | XP_001648973.2integrator complex subunit 14                                                                    |
| AAEL0083f uncharacterized LOC5570448                                | -0.686332237955169  | 0.001582021518439    | 0.0584715831376209  | NA            | NA             | KFB42065.1 AGAPO0                                  | KFB42065.1AGAPO00717-like protein                                                                              |
| AAEL0006f maltase A3                                                | -0.686251738534713  | 0.000504667874313437 | 0.0290898537620388  | NA            | aag01100 ; aag | ETN63249.1 alpha-ar                                | XP_001649787.1maltase A3                                                                                       |
| AAEL0043f uncharacterized LOC5564658                                | -0.686091896471889  | 0.000205798139100932 | 0.0173738942752915  | NA            | NA             | NA                                                 | ABF18024.1putative 41 kDa salivary secreted protein                                                            |
| AAEL0056f perleucan                                                 | -0.684882350832246  | 0.000396136090244732 | 0.0249674267289864  | NA            | NA             | XP_001863975.1 gali                                | XP_019553281.1 perleucan                                                                                       |
| AAEL0205f NA                                                        | -0.683925000085815  | 0.00870740902177239  | 0.150611988380356   | NA            | NA             | NA                                                 | NA                                                                                                             |
| AAEL0239f NA                                                        | -0.683739425868298  | 0.055008642560589    | 0.368425454980292   | NA            | NA             | NA                                                 | XP_021707134.1sulfotransferase 1C4-like                                                                        |
| AAEL0058f proton-coupled amino acid transporter-like protein CG1139 | -0.683512015405047  | 0.0651106407738045   | 0.39730198438886    | NA            | NA             | XP_019529894.1 PRE                                 | XP_021709821.1proton-coupled amino acid transporter-like protein CG1139 isoform X2                             |
| AAEL0273f NA                                                        | -0.681583281913631  | 0.0783939354899689   | 0.428723995967346   | NA            | NA             | NA                                                 | XP_021703452.1zinc finger protein 808-like isoform X1                                                          |

|                                                                                 |                     |                       |                     |               |                |                                                                   |                                                                                     |
|---------------------------------------------------------------------------------|---------------------|-----------------------|---------------------|---------------|----------------|-------------------------------------------------------------------|-------------------------------------------------------------------------------------|
| AAEL0066f Krueppel-like factor 3                                                | -0.680054531258485  | 6,63E+08              | 0.00156538082998626 | NA            | NA             | KXJ68848.1 hypothei                                               | XP_021703889.1Krueppel-like factor 3                                                |
| AAEL0127f serine protease persephone                                            | -0.679126610127911  | 0.00857094976140011   | 0.149464458238032   | NA            | NA             | XP_019538453.1 PRE                                                | XP_021698329.1serine protease persephone                                            |
| AAEL0226f NA                                                                    | -0.67863985379573   | 0.0126898400223591    | 0.182308324322341   | NA            | NA             | NA                                                                | NA                                                                                  |
| AAEL0004f larval cuticle protein A2B                                            | -0.678293819985521  | 0.00343094747056033   | 0.0901744430841277  | NA            | NA             | KXJ79051.1 hypothei                                               | XP_001656455.2larval cuticle protein A2B isoform X2                                 |
| AAEL0080f myeloblastin                                                          | -0.676727207511917  | 0.00097772151057318   | 0.0432547756744923  | NA            | NA             | XP_001865143.1 myi                                                | XP_019530094.1 myeloblastin-like                                                    |
| AAEL0219f NA                                                                    | -0.6754454747709974 | 0.116682774146035     | 0.514582987743323   | NA            | NA             | NA                                                                | NA                                                                                  |
| AAEL0066f uncharacterized LOC5568167                                            | -0.6730538221197912 | 0.000232329098978078  | 0.0188222659264569  | NA            | NA             | ETN64215.1 hypothe                                                | XP_001652104.1uncharacterized protein LOC5568167                                    |
| AAEL0034f uncharacterized LOC5578124                                            | -0.672777862680933  | 0.00266569074543941   | 0.0792437883464128  | NA            | NA             | KFB50017.1 AGAP01                                                 | KFB50017.1.AGAP011936-like protein                                                  |
| AAEL0002f NAD kinase                                                            | -0.67148739295159   | 2,15E+09              | 0.00373033264991284 | 760           | aag01100 ; aag | KXJ75246.1 hypothei                                               | XP_001654785.2NAD kinase isoform X3                                                 |
| AAEL0050f serine protease easter                                                | -0.669423059426774  | 0.000495182226830366  | 0.0290898537620388  | NA            | NA             | XP_019530148.1 PRE                                                | XP_001650347.2serine protease easter                                                |
| AAEL0064f trypsin-1                                                             | -0.667417276227679  | 0.000757317387239843  | 0.0376562079833735  | NA            | aag04080       | KXJ78237.1 hypothei                                               | XP_019538555.1 trypsin-1-like                                                       |
| AAEL0020f uncharacterized LOC5573393                                            | -0.667247453910016  | 0.00935778059915645   | 0.158773875613038   | NA            | NA             | KXJ78793.1 hypothei                                               | XP_021702056.1uncharacterized protein LOC5573393 isoform X2                         |
| AAEL0195f NA                                                                    | -0.663422713805573  | 0.00380611132492403   | 0.0958410502575181  | NA            | NA             | NA                                                                | XP_021695722.1SPARC-related modular calcium-binding protein 2 isoform X2            |
| AAEL0173f probable cytochrome P450 9f2                                          | -0.663304590006281  | 0.0321690229750427    | 0.284442054201394   | NA            | NA             | NA                                                                | XP_021705963.1probable cytochrome P450 9f2                                          |
| AAEL0226f NA                                                                    | -0.663216374178669  | 0.0711859668933623    | 0.409920692961652   | NA            | NA             | NA                                                                | XP_021699104.1arrestin domain-containing protein 17                                 |
| AAEL0199f NA                                                                    | -0.663110715007609  | 0.0795862644598359    | 0.431226849261068   | NA            | NA             | NA                                                                | XP_021695329.1CD109 antigen                                                         |
| AAEL0238f NA                                                                    | -0.662249951096185  | 0.0538374057795699    | 0.366428852058877   | NA            | NA             | NA                                                                | XP_021696418.1shematinr-like protein 1 isoform X2                                   |
| AAEL0004f trichohyalin                                                          | -0.660000729994166  | 0.0488409925715207    | 0.351987741182022   | NA            | NA             | KXJ79049.1 hypothei                                               | XP_019559367.1 zinc finger CCCH domain-containing protein 13-like                   |
| AAEL0201f NA                                                                    | -0.658382836879597  | 0.0388131977744093    | 0.31084338200184    | NA            | NA             | NA                                                                | XP_021695706.1zinc finger protein 62                                                |
| AAEL0081f period circadian protein                                              | -0.655699473489041  | 0.0557693251793926    | 0.371779217267728   | NA            | aag04711       | XP_019527791.1 PRE                                                | XP_021710527.1period circadian protein isoform X2                                   |
| AAEL0182f NA                                                                    | -0.654990019856725  | 0.0400125924434144    | 0.31441514682591    | NA            | NA             | XP_001656120.2uncharacterized protein LOC5576417                  | XP_001656120.2uncharacterized protein LOC5576417                                    |
| AAEL0003f probable cytochrome P450 313a2                                        | -0.65474802244938   | 0.00198068927950508   | 0.0693618362591811  | NA            | NA             | KXJ73598.1 hypothei                                               | XP_001655570.2probable cytochrome P450 313a2                                        |
| AAEL0072f rhythmically expressed gene 5 protein                                 | -0.652337051798238  | 0.000179528023242812  | 0.0158043227775695  | NA            | NA             | KXJ78543.1 hypothei                                               | XP_001658223.2rhythmically expressed gene 5 protein                                 |
| AAEL0005f neither inactivation nor afterpotential protein C                     | -0.651965317856812  | 2,75E+09              | 0.00444705716380738 | NA            | aag04745       | KXJ77723.1 hypothei                                               | XP_021703004.1neither inactivation nor afterpotential protein C                     |
| AAEL0084f cystathionine beta-synthase                                           | -0.651898111282021  | 0.00388943009608854   | 0.0964704467498835  | 00260 ; 00270 | aag01100 ; aag | KFB40177.1 AGAP00                                                 | XP_001659242.1cystathionine beta-synthase                                           |
| AAEL0249f NA                                                                    | -0.650473107397688  | 0.091352751429254     | 0.45924393656719    | NA            | NA             | NA                                                                | XP_021693848.1uncharacterized protein LOC5577641                                    |
| AAEL0232f NA                                                                    | -0.649060120934635  | 0.0218183564839261    | 0.241418388148241   | NA            | NA             | NA                                                                | XP_021703906.1probable cationic amino acid transporter                              |
| AAEL0022f uncharacterized LOC5574092                                            | -0.647840610671833  | 0.0019064082414595    | 0.0684803907362791  | NA            | NA             | XP_001688757.1 AG                                                 | XP_001661163.2uncharacterized protein LOC5574092                                    |
| AAEL0143f protein takeout                                                       | -0.6455821163666    | 0.00123884937856766   | 0.0131032670008961  | NA            | NA             | NA                                                                | XP_001648617.2protein takeout                                                       |
| AAEL0218f NA                                                                    | -0.645138255240676  | 0.0807187865280397    | 0.433079891352508   | NA            | aag01100 ; aag | NA                                                                | XP_021707064.1beta-1,4-glucuronyltransferase 1                                      |
| AAEL0038f uncharacterized LOC5579001                                            | -0.644915354406439  | 0.000506842260928841  | 0.0290898537620388  | NA            | NA             | KXJ69749.1 hypothei                                               | XP_001664180.2uncharacterized protein LOC5579001                                    |
| AAEL0105f maltase 1                                                             | -0.643942355701957  | 0.00998912821385285   | 0.161638111035661   | NA            | aag01100 ; aag | KXJ82055.1 hypothei                                               | XP_001660908.1maltase 1                                                             |
| AAEL0013f amphoterin-induced protein 2                                          | -0.643668041401957  | 0.032671714554506     | 0.28463170766102    | NA            | aag04013       | XP_001866205.1 kek                                                | XP_001653183.2amphoterin-induced protein 2                                          |
| AAEL0203f NA                                                                    | -0.642420930175411  | 0.0315991076202634    | 0.28423411888152    | NA            | aag04120       | NA                                                                | XP_021701860.1ubiquitin-conjugating enzyme E2Q-like protein 1                       |
| AAEL0091f probable cytochrome P450 6a13                                         | -0.642314438504555  | 0.000360067997874568  | 0.0231702497653271  | NA            | NA             | KXJ81549.1 hypothei                                               | XP_001653674.1probable cytochrome P450 6a13                                         |
| AAEL0022f trypsin-3                                                             | -0.64170931827328   | 9,48E+09              | 0.0110128080760421  | NA            | NA             | NA                                                                | XP_019531494.1 PRE                                                                  |
| AAEL0090f uncharacterized LOC5571443                                            | -0.641581502443799  | 0.000237543984467937  | 0.01884379090581    | NA            | NA             | AAV90685.1 putative AAL76016.1putative 56.5 kDa secreted protein  | XP_019931973.1 trypsin-3-like                                                       |
| AAEL0007f senecionine N-oxygenase                                               | -0.63956851516616   | 0.0306875318355598    | 0.281224109837052   | NA            | NA             | NA                                                                | XP_001657694.1 hypothei                                                             |
| AAEL0135f flexible cuticle protein 12                                           | -0.639399604506245  | 0.0393612650014826    | 0.313353264954028   | NA            | NA             | NA                                                                | XP_001663702.2flexible cuticle protein 12                                           |
| AAEL0008f uncharacterized LOC5567196                                            | -0.637247261942861  | 0.000325259888841996  | 0.0221706777564744  | NA            | NA             | AAV90646.1 putative AAY41838.1putative secreted protein precursor | XP_001652182.2senecionine N-oxygenase                                               |
| AAEL0221f NA                                                                    | -0.635805538033628  | 0.0631722862279908    | 0.392761482378267   | NA            | NA             | NA                                                                | XP_021709877.1transmembrane protein 42                                              |
| AAEL0006f tenascin                                                              | -0.63572176182641   | 0.0116582506311351    | 0.173701685309403   | NA            | NA             | XP_019557044.1 PRE                                                | XP_021701063.1tenascin isoform X2                                                   |
| AAEL0019f lactosylceramide 4-alpha-galactosyltransferase                        | -0.635628378245701  | 0.0573400529827352    | 0.375282253447461   | 901           | aag01100 ; aag | KXJ75779.1 hypothei                                               | XP_001654206.1lactosylceramide 4-alpha-galactosyltransferase                        |
| AAEL0066f uncharacterized LOC5568175                                            | -0.634036878222911  | 0.00406051056701101   | 0.0251783355746793  | NA            | NA             | KXJ74283.1 hypothei                                               | XP_001652111.2uncharacterized protein LOC5568175                                    |
| AAEL0043f uncharacterized LOC5564576                                            | -0.632490586428262  | 0.0624270974543667    | 0.390519477073475   | NA            | NA             | XP_001855861.1 con                                                | XP_001648927.1uncharacterized protein LOC5564576                                    |
| AAEL0136f L-xylulose reductase                                                  | -0.631855359692175  | 0.00122091130821631   | 0.0490603749266657  | NA            | aag01100 ; aag | NA                                                                | XP_021701536.1L-xylulose reductase                                                  |
| AAEL0035f putative sulfiredoxin                                                 | -0.631797789235921  | 0.0885871641466853    | 0.455153034325962   | NA            | NA             | XP_019552325.1 PRE                                                | XP_001657042.1putative sulfiredoxin isoform X1                                      |
| AAEL0222f NA                                                                    | -0.631447346519558  | 0.0162371166197047    | 0.205804334896037   | NA            | NA             | NA                                                                | XP_001843649.1Odorant-binding protein 56a                                           |
| AAEL0034f uncharacterized LOC5578211                                            | -0.630425437351875  | 0.0002125677378512457 | 0.0131418549667231  | NA            | NA             | XP_001870800.1 con                                                | XP_001656855.2uncharacterized protein LOC5578211                                    |
| AAEL0073f lipopolysaccharide-induced tumor necrosis factor-alpha factor homolog | -0.628127270196841  | 0.0173293756636615    | 0.212447748888425   | NA            | aag04142       | ETN64689.1 hypothe                                                | XP_001652693.2lipopolysaccharide-induced tumor necrosis factor-alpha factor homolog |
| AAEL0143f uncharacterized LOC5564274                                            | -0.623990184122571  | 0.00419797289492645   | 0.100860957125622   | 901           | NA             | NA                                                                | XP_001648624.2uncharacterized protein LOC5564274                                    |
| AAEL0106f uncharacterized LOC5573642                                            | -0.623878912576277  | 0.0255695180991202    | 0.260925069284669   | NA            | NA             | XP_001849593.1 con                                                | XP_001652104.1AEL010633                                                             |
| AAEL0231f NA                                                                    | -0.622122316117168  | 0.00115012084194681   | 0.0475020022701074  | NA            | NA             | NA                                                                | XP_021694340.1uncharacterized protein LOC5572392                                    |
| AAEL0099f uncharacterized LOC5572399                                            | -0.62155346616597   | 0.0497071991466785    | 0.355128607568118   | NA            | NA             | NA                                                                | XP_021706232.1uncharacterized protein LOC5572399                                    |
| AAEL0143f putative fatty acyl-CoA reductase CG5065                              | -0.620822647322205  | 0.0218429895900659    | 0.241418388148241   | 73            | aag04146       | NA                                                                | XP_021700067.1putative fatty acyl-CoA reductase CG5065 isoform X1                   |
| AAEL0043f uncharacterized LOC5564644                                            | -0.62069304169518   | 0.033110032594119     | 0.285726819198035   | NA            | NA             | KXJ81936.1 hypothei                                               | ABF18165.1putative salivary mucin                                                   |
| AAEL0102f short-chain dehydrogenase/reductase family 16C member 6               | -0.620649602183265  | 0.000464792422258529  | 0.02795437823283    | NA            | aag00830       | NA                                                                | XP_021701800.1short-chain dehydrogenase/reductase family 16C member 6               |
| AAEL0104f facilitated trehalose transporter Tret1-2 homolog                     | -0.619548079453165  | 0.0978902279444988    | 0.473599304703091   | NA            | NA             | XP_021693624.1facilitated trehalose transporter Tret1-2 homolog   | XP_021693624.1facilitated trehalose transporter Tret1-2 homolog                     |
| AAEL0088f fatty acyl-CoA reductase 1                                            | -0.618583936894871  | 0.0044500400250279    | 0.103991720320479   | 73            | NA             | XP_001849289.1 con                                                | XP_021706040.1fatty acyl-CoA reductase 1                                            |
| AAEL0123f putative odorant-binding protein A10                                  | -0.617728539475923  | 0.205989643463562     | 0.638221110825488   | NA            | NA             | AGF68546.1 chemos                                                 | XP_001662524.1putative odorant-binding protein A10                                  |
| AAEL0141f NA                                                                    | -0.616293077599241  | 0.229073532922203     | 0.662455890682856   | NA            | NA             | NA                                                                | XP_001648188.2POU domain, class 6, transcription factor 2                           |
| AAEL0203f NA                                                                    | -0.614603385017013  | 0.112740779222083     | 0.503856            |               |                |                                                                   |                                                                                     |

|           |                                                            |                     |          |                      |                    |                         |                |                                                                       |                                                                              |
|-----------|------------------------------------------------------------|---------------------|----------|----------------------|--------------------|-------------------------|----------------|-----------------------------------------------------------------------|------------------------------------------------------------------------------|
| AAEL0080c | clavesin-1                                                 | -0.593373305427196  | 9,69E+08 | 0.0110128080760421   | NA                 | NA                      | KXJ75160.1     | hypothei                                                              | ABF18203.1phosphatidylinositol transfer protein SEC14                        |
| AAEL0066c | glycine N-acyltransferase-like protein 3                   | -0.591899263249496  |          | 0.0724535003364336   | 0.413814782657084  | NA                      | NA             | XP_019543714.1                                                        | PRE XP_001657925.2glycine N-acyltransferase-like protein 3 isoform X1        |
| AAEL0155c | general odorant-binding protein 67                         | -0.589862919001306  |          | 0.00548371686097412  | 0.118732147187492  | NA                      | NA             | NA                                                                    | XP_021695486.1general odorant-binding protein 67                             |
| AAEL0080c | trypsin alpha-3                                            | -0.58922872698167   |          | 0.00307929612154358  | 0.08718671664752   | NA                      | NA             | KXJ76281.1                                                            | hypothei XP_001653091.2trypsin alpha-3                                       |
| AAEL0181c | NA                                                         | -0.588802514297672  |          | 0.0221499368641098   | 0.242070925206103  | NA                      | NA             | NA                                                                    | XP_001652631.2uncharacterized protein LOC5568971                             |
| AAEL0045c | serine protease persephone                                 | -0.588391187989614  |          | 0.0149102834701481   | 0.197132799557907  | NA                      | NA             | KXJ77293.1                                                            | hypothei XP_001649322.2serine protease persephone isoform X1                 |
| AAEL0279c | NA                                                         | -0.587866412898341  |          | 0.0689635142409943   | 0.40335424698601   | NA                      | NA             | NA                                                                    | XP_021711304.1uncharacterized protein LOC110679834                           |
| AAEL0095c | NA                                                         | -0.587737960571419  |          | 0.0008638166644876   | 0.0409667993696665 | NA                      | NA             | NA                                                                    | XP_001660189.2probable maltase                                               |
| AAEL0040c | diphosphomevalonate decarboxylase                          | -0.5872719138176123 |          | 0.0374117433462492   | 0.305927960955648  | 900                     | aag01100 ; aag | XP_001844728.1                                                        | dipi XP_001648384.2diphosphomevalonate decarboxylase                         |
| AAEL0198c | NA                                                         | -0.58517371370329   |          | 0.0102498565073917   | 0.163088391445208  | NA                      | NA             | NA                                                                    | XP_021704753.1cysteine-rich secretory protein LCC1 domain-containing 1       |
| AAEL0056c | myosin heavy chain, muscle                                 | -0.58469436231731   |          | 0.000258651836166168 | 0.0195653835802185 | NA                      | NA             | XP_019530282.1                                                        | PRE XP_021702575.1myosin heavy chain, muscle                                 |
| AAEL0181c | uncharacterized LOC5570124                                 | -0.584448087309156  |          | 0.114303878420794    | 0.508373266905823  | NA                      | NA             | NA                                                                    | XP_021693114.1uncharacterized protein LOC5570124                             |
| AAEL0057c | alpha-tocopherol transfer protein-like                     | -0.584033372628412  |          | 0.0479053041246659   | 0.348612005978262  | NA                      | NA             | XP_019565353.1                                                        | PRE XP_001651427.1alpha-tocopherol transfer protein-like isoform X1          |
| AAEL0055c | zinc finger protein 521                                    | -0.582596430032     |          | 0.074546201809109    | 0.419169079991884  | NA                      | NA             | KXJ81460.1                                                            | hypothei XP_021711345.1zinc finger protein 521                               |
| AAEL0127c | pyrokinin-1 receptor                                       | -0.582226138087494  |          | 0.1057449887211551   | 0.490374022320757  | NA                      | aag04080       | ETN65601.1                                                            | g-protei XP_021694461.1pyrokinin-1 receptor                                  |
| AAEL0133c | GPALPP motifs-containing protein 1                         | -0.581682970098349  |          | 0.148100898788358    | 0.562679383080301  | NA                      | NA             | NA                                                                    | XP_021706430.1GPALPP motifs-containing protein 1                             |
| AAEL0207c | NA                                                         | -0.579354791115833  |          | 0.112364074760824    | 0.503547755711443  | NA                      | NA             | NA                                                                    | XP_021711339.1zinc finger protein Xfin-like isoform X1                       |
| AAEL0139c | probable 3',5'-cyclic phosphodiesterase pde-5              | -0.579345110079072  |          | 0.0404894924428262   | 0.316225178415075  | NA                      | aag01100 ; aag | NA                                                                    | XP_021700131.1probable 3',5'-cyclic phosphodiesterase pde-5                  |
| AAEL0198c | NA                                                         | -0.579126210560111  |          | 0.0100385805811511   | 0.161638111035661  | 901                     | NA             | NA                                                                    | XP_021704849.1uncharacterized protein LOC110677773                           |
| AAEL0031c | low molecular weight phosphotyrosine protein phosphatase 1 | -0.57905856567409   |          | 0.080205227102308    | 0.433079891352508  | 00740 ; 00730           | NA             | XP_019528151.1                                                        | PRE XP_001656483.2low molecular weight phosphotyrosine protein phosphatase 1 |
| AAEL0054c | annexin B10                                                | -0.578442629230903  |          | 0.000724269320916817 | 0.0369889266214859 | NA                      | NA             | KXJ70192.1                                                            | hypothei XP_001650850.1annexin B10                                           |
| AAEL0175c | cuticle protein 12.5                                       | -0.577828140206454  |          | 0.154980470282026    | 0.572513162398717  | NA                      | NA             | NA                                                                    | XP_011492965.1cuticle protein 12.5                                           |
| AAEL0051c | serine-rich adhesion for platelets                         | -0.576249083977917  |          | 0.00563644048005895  | 0.120339965887477  | NA                      | NA             | KXJ81171.1                                                            | hypothei XP_019525874.1 homeobox protein 2                                   |
| AAEL0057c | chaoptin                                                   | -0.575646548118439  |          | 0.0107812466350419   | 0.167582823539959  | NA                      | NA             | KXJ83773.1                                                            | hypothei XP_019530720.1 toll-like receptor 7                                 |
| AAEL0112c | zinc finger Ran-binding domain-containing protein 2        | -0.575345359377545  |          | 0.0211609209684721   | 0.237177581914593  | NA                      | XP_019544419.1 | PRE XP_001661556.2zinc finger Ran-binding domain-containing protein 2 |                                                                              |
| AAEL0281c | NA                                                         | -0.574269460409655  |          | 0.0542794772404054   | 0.367469712613638  | NA                      | NA             | NA                                                                    | XP_021708721.1uncharacterized protein LOC110679080                           |
| AAEL0272c | NA                                                         | -0.574043739943697  |          | 0.0448975147575279   | 0.335702315059737  | NA                      | NA             | NA                                                                    | XP_001649035.2proteoglycan 4 isoform X3                                      |
| AAEL0229c | NA                                                         | -0.573138840325518  | 7,02E+09 | 0.00872653094146289  |                    | NA                      | NA             | NA                                                                    | XP_021694825.1transmembrane protein 41B isoform X1                           |
| AAEL0105c | transcription factor cwo                                   | -0.57273318182146   |          | 0.00112904586945344  | 0.04722490950323   | NA                      | NA             | NA                                                                    | XP_021693046.1transcription factor cwo isoform X1                            |
| AAEL0123c | uncharacterized LOC5576168                                 | -0.572009591727173  |          | 0.0951000916263656   | 0.4666773927728342 | NA                      | NA             | KXJ73506.1                                                            | hypothei XP_021697659.1uncharacterized protein LOC5576168 isoform X2         |
| AAEL0243c | NA                                                         | -0.571909823442408  |          | 0.0290982796985367   | 0.275227088745645  | NA                      | NA             | NA                                                                    | XP_021713007.1high-affinity choline transporter 1                            |
| AAEL0047c | homocysteine S-methyltransferase                           | -0.570249272508118  |          | 0.0717801496177233   | 0.216133337898418  | NA                      | aag01100 ; aag | KFB41458.1                                                            | AGAP00 XP_001850787.1homocysteine S-methyltransferase                        |
| AAEL0224c | NA                                                         | -0.570057061185786  |          | 0.1599870772729566   | 0.577560236664366  | NA                      | NA             | NA                                                                    | XP_021696334.1kazarin isoform X1                                             |
| AAEL0196c | NA                                                         | -0.568369312095693  |          | 0.0206212513324651   | 0.233690584681458  | NA                      | NA             | NA                                                                    | XP_021703462.1cell death abnormality protein 1 isoform X2                    |
| AAEL0122c | glycine receptor subunit alpha-3                           | -0.568093254090669  |          | 0.0454072804193566   | 0.338330197910056  | NA                      | NA             | KXJ77459.1                                                            | hypothei XP_021708175.1glycine receptor subunit alpha-3                      |
| AAEL0010c | melanization protease 1                                    | -0.567222487235838  |          | 0.00633840544660372  | 0.129902019865584  | NA                      | NA             | KXJ82331.1                                                            | hypothei XP_001658014.1melanization protease 1                               |
| AAEL0080c | uncharacterized LOC5569955                                 | -0.567048400119824  |          | 0.0379091174605523   | 0.307682856236235  | NA                      | NA             | KXJ73764.1                                                            | hypothei XP_001658853.2uncharacterized protein LOC5569955                    |
| AAEL0260c | NA                                                         | -0.567022626715696  |          | 0.001946037838772979 | 0.0165809631407329 | 00061 ; 00254 ; 00620 ; | aag01100 ; aag | NA                                                                    | XP_021698257.1acetyl-CoA carboxylase isoform X1                              |
| AAEL0134c | uncharacterized LOC5577977                                 | -0.566733032762027  |          | 0.0139373543549919   | 0.189161555714802  | NA                      | NA             | NA                                                                    | XP_021698914.1uncharacterized protein LOC5577977                             |
| AAEL0038c | NA                                                         | -0.566568782784668  |          | 0.0042765782566331   | 0.101309654457692  | NA                      | NA             | XP_019529367.1                                                        | PRE XP_001664290.2probable cytochrome P450 28a5                              |
| AAEL0265c | NA                                                         | -0.565279751496164  |          | 0.01029512717559     | 0.163337517706516  | NA                      | NA             | NA                                                                    | NA                                                                           |
| AAEL0079c | uncharacterized LOC5569903                                 | -0.565263989751631  |          | 0.00112223061071301  | 0.04722490590323   | NA                      | NA             | NA                                                                    | ABF18039.1putative 18.6 kDa secreted protein variant 2                       |
| AAEL0132c | tubulin alpha-1 chain                                      | -0.563884889689015  |          | 0.000351468050676226 | 0.0229513912830783 | NA                      | aag04145       | NA                                                                    | XP_001663407.1tubulin alpha-1 chain                                          |
| AAEL0026c | venom allergen 5.02                                        | -0.563778767043028  |          | 0.000390367139960622 | 0.0247735063580527 | NA                      | NA             | AAV90675.1                                                            | salivary XP_001662117.1venom allergen 5.02                                   |
| AAEL0138c | rabenosyn-5                                                | -0.563562971329873  |          | 0.11015660823377     | 0.50007948183458   | NA                      | aag04144       | NA                                                                    | XP_019555496.1 rabenosyn-5-like                                              |
| AAEL0069c | annulin                                                    | -0.561941410581441  |          | 0.00204746849977721  | 0.0710935580475365 | NA                      | NA             | XP_001845164.1                                                        | anr XP_001652440.1annulin isoform X1                                         |
| AAEL0072c | nidogen-2                                                  | -0.561654067552516  |          | 0.00112462660124739  | 0.04722490950323   | NA                      | NA             | KXJ83140.1                                                            | hypothei XP_019538107.1 nidogen-1-like                                       |
| AAEL0053c | AP-1 complex subunit gamma-1                               | -0.560900274889078  |          | 0.0616282757536091   | 0.128303935177536  | NA                      | NA             | XP_001843588.1                                                        | ada XP_021709853.1AP-1 complex subunit gamma-1                               |
| AAEL0085c | endothelin-converting enzyme 2                             | -0.560693124211282  |          | 0.146040160045596    | 0.560092931004593  | NA                      | NA             | XP_019548121.1                                                        | PRE XP_021705832.1endothelin-converting enzyme 2                             |
| AAEL0015c | WD repeat-containing protein 35                            | -0.559975900701585  |          | 0.150712141096052    | 0.56602536924239   | NA                      | NA             | ETN65290.1                                                            | wd-repe XP_001659551.2WD repeat-containing protein 35                        |
| AAEL0150c | myrosinase 1                                               | -0.559252028015751  |          | 0.00321519295224638  | 0.088916783130334  | NA                      | NA             | NA                                                                    | XP_021698828.1myrosinase 1                                                   |
| AAEL0211c | NA                                                         | -0.558510363863075  |          | 0.0310306677783865   | 0.282437393567471  | NA                      | NA             | NA                                                                    | XP_021695405.1microfibril-associated glycoprotein 4                          |
| AAEL0059c | 6-phosphogluconate dehydrogenase, decarboxylating          | -0.558275180793702  |          | 0.000261720736711336 | 0.0195653835802185 | 00030 ; 00480           | aag01100 ; aag | KXJ71124.1                                                            | hypothei XP_021706629.16-phosphogluconate dehydrogenase, decarboxylating     |
| AAEL0018c | protein msta                                               | -0.55652225333493   |          | 0.0282889464817268   | 0.272581031963194  | NA                      | NA             | KXJ71688.1                                                            | hypothei XP_001654144.2protein msta                                          |
| AAEL0087c | uncharacterized LOC5571024                                 | -0.555598922965132  |          | 0.0616619715517185   | 0.387312943494139  | NA                      | NA             | KXJ74337.1                                                            | hypothei XP_001659458.2uncharacterized protein LOC5571024                    |
| AAEL0125c | probable Rho GTPase-activating protein CG5521              | -0.555502592185723  |          | 0.00933773084691493  | 0.158773875613038  | NA                      | NA             | XP_019554071.1                                                        | PRE XP_021693736.1probable Rho GTPase-activating protein CG5521 isoform X1   |
| AAEL0015c | venom carboxylesterase-6                                   | -0.55475852160895   |          | 0.0109924097895283   | 0.168586924805399  | NA                      | NA             | KXJ69371.1                                                            | hypothei XP_021709982.1venom carboxylesterase-6 isoform X1                   |
| AAEL0069c | collagenase                                                | -0.553096388668421  |          | 0.0269780551262439   | 0.267809217385466  | NA                      | NA             | XP_001845462.1                                                        | seri XP_019524662.1 collagenase                                              |
| AAEL0250c | NA                                                         | -0.552404369388453  |          | 0.177826574595555    | 0.602932991683234  | NA                      | NA             | NA                                                                    | XP_021694328.1 melanization protease 1                                       |
| AAEL0130c | zinc finger protein 14                                     | -0.551211375691152  |          | 0.01706960581633     | 0.409506895880945  | NA                      | NA             | NA                                                                    | XP_0016                                                                      |

|                                                                      |                     |                      |                    |               |          |                                     |                                                                                                          |                                                            |
|----------------------------------------------------------------------|---------------------|----------------------|--------------------|---------------|----------|-------------------------------------|----------------------------------------------------------------------------------------------------------|------------------------------------------------------------|
| AAEL0246: NA                                                         | -0.530925105392652  | 0.0465783226834622   | 0.344268052476481  | NA            | NA       | NA                                  | NA                                                                                                       |                                                            |
| AAEL0101: uncharacterized LOC5572920                                 | -0.53011619475774   | 0.24823879684659     | 0.677726824646112  | NA            | NA       | XP_001654253.2                      | uncharacterized protein LOC5572920                                                                       |                                                            |
| AAEL0016: uncharacterized LOC5571683                                 | -0.530055758320929  | 0.0968779342124512   | 0.470633908275356  | NA            | NA       | ETN65836.1                          | hypothe XP_021701183.1                                                                                   | uncharacterized protein LOC5571683                         |
| AAEL0127: protein CutA homolog                                       | -0.529862500134391  | 0.0939288118643083   | 0.464827306598816  | NA            | NA       | KXJ69709.1                          | hypothei XP_021694361.1                                                                                  | protein CutA homolog                                       |
| AAEL0118: uncharacterized LOC5575474                                 | -0.528850035409968  | 0.0830581053245461   | 0.43799466200371   | NA            | NA       | KXJ84239.1                          | hypothei XP_019552850.1                                                                                  | cylicin-1-like                                             |
| AAEL0103: xanthine dehydrogenase/oxidase                             | -0.528674780368342  | 0.000450485102623052 | 0.0273106386927193 | NA            | NA       | NA                                  | XP_001654511.2                                                                                           | xanthine dehydrogenase/oxidase                             |
| AAEL0115: uncharacterized LOC5575041                                 | -0.528356326044733  | 0.00316243516278544  | 0.0884520619086676 | NA            | NA       | KFB36569.1                          | AGAP00_KFB36569.1                                                                                        | AGAP007679-like protein                                    |
| AAEL0014: T-complex protein 11-like protein 1                        | -0.527670791185995  | 0.00492953242387556  | 0.111727973804194  | NA            | NA       | XP_019553406.1                      | PRE XP_021700929.1                                                                                       | T-complex protein 11-like protein 1 isoform X2             |
| AAEL0031: retinol dehydrogenase 14                                   | -0.527167219885022  | 0.00692211124848952  | 0.137411930736898  | NA            | NA       | KFB37597.1                          | short-ch XP_001656339.2                                                                                  | retinol dehydrogenase 14 isoform X3                        |
| AAEL0109: protein FAM207A                                            | -0.526576917418604  | 0.0288688430795991   | 0.274601260220884  | NA            | NA       | KXJ72764.1                          | hypothei XP_001655063.1                                                                                  | protein FAM207A isoform X1                                 |
| AAEL0181: NA                                                         | -0.526013861129238  | 0.000180336219478896 | 0.0158043227775695 | NA            | NA       | NA                                  | XP_019530313.1                                                                                           | general odorant-binding protein 99b-like                   |
| AAEL0271: NA                                                         | -0.525950423852668  | 0.0926867941595237   | 0.462398967492132  | NA            | NA       | NA                                  | XP_021712484.1                                                                                           | uncharacterized protein LOC110681024                       |
| AAEL0175: bifunctional endo-1,4-beta-xylanase XylA                   | -0.525844334396135  | 0.0193525529784722   | 0.226893947646744  | NA            | NA       | NA                                  | XP_011493432.1                                                                                           | uncharacterized protein LOC23687983                        |
| AAEL0131: uncharacterized LOC5547403                                 | -0.5235486408077784 | 0.00220622932345701  | 0.0737239957572492 | NA            | NA       | NA                                  | XP_021697231.1                                                                                           | uncharacterized protein LOC5547403 isoform X2              |
| AAEL0066: uncharacterized LOC5564674                                 | -0.523383710213361  | 0.00088808645420269  | 0.0413193578047436 | NA            | NA       | KXJ78668.1                          | hypothei XP_021701558.1                                                                                  | uncharacterized protein LOC5564674 isoform X1              |
| AAEL0216: NA                                                         | -0.521432305603408  | 0.261396626927076    | 0.694591903258144  | NA            | NA       | NA                                  | NA                                                                                                       | NA                                                         |
| AAEL0210: NA                                                         | -0.519778469257012  | 0.0176365365602698   | 0.214955509175633  | NA            | NA       | NA                                  | XP_021704067.1                                                                                           | homeotic protein spalt-major isoform X2                    |
| AAEL0246: NA                                                         | -0.519720453294017  | 0.0409451998133462   | 0.318493430838894  | NA            | NA       | NA                                  | XP_021697799.1                                                                                           | neuronal calcium sensor 2 isoform X3                       |
| AAEL0140: uncharacterized LOC5563737                                 | -0.519324696409381  | 0.0528027017071256   | 0.362633125106993  | NA            | NA       | NA                                  | XP_021697438.1                                                                                           | uncharacterized protein LOC5563737 isoform X1              |
| AAEL0041: GDP-fucose protein O-fucosyltransferase 2                  | -0.518013811576399  | 0.0784250482345933   | 0.358723995967346  | NA            | aag00514 | KXJ69771.1                          | hypothei XP_001648601.2                                                                                  | GDP-fucose protein O-fucosyltransferase 2                  |
| AAEL0052: capon-like protein                                         | -0.517760284365954  | 0.0507127538457321   | 0.42814179653755   | NA            | NA       | XP_019538678.1                      | PRE XP_021695362.1                                                                                       | capon-like protein isoform X3                              |
| AAEL0064: 37 kDa salivary gland allergen Aed a 2                     | -0.516972654026158  | 0.0008681293063568   | 0.0409667993696665 | NA            | NA       | 3DXL_A Chain A, Cry: XP_001657779.1 | 37 kDa salivary gland allergen Aed a 2                                                                   |                                                            |
| AAEL0067: fatty acyl-CoA reductase wat                               | -0.516301582868378  | 0.0214295616326645   | 0.238631723223164  | 73            | aag04146 | KFB37832.1                          | AGAP01_XP_001658050.1                                                                                    | fatty acyl-CoA reductase wat                               |
| AAEL0196: NA                                                         | -0.515964473490072  | 0.000781339133675292 | 0.0380417074501589 | NA            | NA       | NA                                  | XP_021707456.1                                                                                           | IGAS2-like protein pickled eggs                            |
| AAEL0050: TELO2-interacting protein 1 homolog                        | -0.515954085722406  | 0.159764493838551    | 0.577560236664366  | NA            | aag04150 | KXJ77559.1                          | hypothei XP_001650296.2                                                                                  | TELO2-interacting protein 1 homolog                        |
| AAEL0048: F-BAR and double SH3 domains protein 2                     | -0.515653493046856  | 0.145567654582253    | 0.558950568057442  | NA            | NA       | KXJ82642.1                          | hypothei XP_021697738.1                                                                                  | F-BAR and double SH3 domains protein 2 isoform X2          |
| AAEL0024: GATA zinc finger domain-containing protein 14              | -0.515149474279818  | 0.0317900165705785   | 0.284442054201394  | NA            | NA       | KXJ80172.1                          | hypothei XP_021701270.1                                                                                  | GATA zinc finger domain-containing protein 14              |
| AAEL0200: NA                                                         | -0.514362586092207  | 0.00327700397249374  | 0.0891942138367879 | NA            | NA       | NA                                  | NA                                                                                                       | NA                                                         |
| AAEL0014: venom acid phosphatase AcpH-1                              | -0.513647744282421  | 0.00354960081170293  | 0.091238621981258  | 00740 ; 00730 | NA       | KFB51638.1                          | AGAP00_XP_001659203.1                                                                                    | venom acid phosphatase AcpH-1                              |
| AAEL0134: spaetzle 1C                                                | -0.513092597823355  | 0.00710840921184135  | 0.137861850831157  | NA            | NA       | NA                                  | XP_021703650.1                                                                                           | uncharacterized protein LOC5577955 isoform X1              |
| AAEL0223: NA                                                         | -0.512603006592127  | 0.0678033283416905   | 0.40094231299198   | NA            | NA       | NA                                  | XP_021697296.1                                                                                           | IPR domain zinc finger protein 5                           |
| AAEL0001: general odorant-binding protein 19d                        | -0.512430322617427  | 0.0244138406933879   | 0.255291093250631  | NA            | NA       | KXJ71014.1                          | hypothei XP_021705225.1                                                                                  | general odorant-binding protein 19d                        |
| AAEL0019: transcription initiation factor TFIID subunit 13           | -0.511469912662328  | 0.0919059045942686   | 0.46005268034546   | NA            | aag03022 | KXJ69137.1                          | hypothei XP_001660799.1                                                                                  | transcription initiation factor TFIID subunit 13           |
| AAEL0012: uncharacterized protein C15orf41 homolog                   | -0.511113132796905  | 0.0910360962807765   | 0.459021456425044  | NA            | NA       | KXJ83294.1                          | hypothei XP_001652881.1                                                                                  | uncharacterized protein C15orf41 homolog                   |
| AAEL0117: zinc finger protein Xfin                                   | -0.51086293666332   | 0.168704312262462    | 0.58892909007556   | NA            | NA       | XP_019532048.1                      | PRE XP_001655647.2                                                                                       | zinc finger protein Xfin isoform X2                        |
| AAEL0013: uncharacterized LOC5569810                                 | -0.510418513305911  | 0.000798116578241877 | 0.038584534817923  | NA            | NA       | NA                                  | XP_001653027.2                                                                                           | uncharacterized protein LOC5569810 isoform X2              |
| AAEL0225: NA                                                         | -0.508493237042479  | 0.0875697074180118   | 0.452464151890787  | NA            | NA       | NA                                  | XP_021707406.1                                                                                           | zinc finger protein 25-like                                |
| AAEL0290: NA                                                         | -0.507546378660314  | 0.0311460864178484   | 0.282649198438896  | NA            | NA       | EAT45022.1                          | AAEL003655                                                                                               | NA                                                         |
| AAEL0087: transmembrane protein 53-A                                 | -0.507076717068367  | 0.00827175892005891  | 0.147227709056832  | NA            | NA       | KXJ73539.1                          | hypothei XP_001653445.1                                                                                  | transmembrane protein 53-A                                 |
| AAEL0075: alpha-tocopherol transfer protein-like                     | -0.506571164638113  | 0.0216777454349713   | 0.240625589255255  | NA            | NA       | KXJ82198.1                          | hypothei XP_001652786.2                                                                                  | alpha-tocopherol transfer protein-like                     |
| AAEL0013: folliculin-interacting protein 2                           | -0.506321821824926  | 0.0467472208563327   | 0.345031868617454  | NA            | aag04150 | KXJ75351.1                          | hypothei XP_021699497.1                                                                                  | folliculin-interacting protein 2                           |
| AAEL0067: uncharacterized LOC5579920                                 | -0.506251444400016  | 0.0326962306516773   | 0.28463170766102   | NA            | NA       | KXJ79849.1                          | hypothei XP_001652209.2                                                                                  | uncharacterized protein LOC5579920                         |
| AAEL02518: NA                                                        | -0.506098405461433  | 0.000303735219567651 | 0.021174026428904  | NA            | NA       | NA                                  | XP_019549401.2                                                                                           | titin-like                                                 |
| AAEL0118: protein obstructor-E                                       | -0.505939502680304  | 0.0920264539552414   | 0.460232298530506  | NA            | NA       | KXJ84418.1                          | hypothei XP_001662027.2                                                                                  | protein obstructor-E                                       |
| AAEL0013: protein takeout                                            | -0.504311580355118  | 0.00508961796966774  | 0.0290898537620388 | NA            | NA       | XP_019561180.1                      | PRE XP_001653020.2                                                                                       | protein takeout isoform X1                                 |
| AAEL0240: NA                                                         | -0.503902151389409  | 0.237897948115689    | 0.672545904319684  | NA            | NA       | NA                                  | NA                                                                                                       | NA                                                         |
| AAEL0029: protein Spindly                                            | -0.503428559704527  | 0.18985297637012     | 0.61841666851605   | NA            | NA       | KXJ74844.1                          | hypothei XP_021694237.1                                                                                  | protein Spindly                                            |
| AAEL0076: myosin light chain kinase 2, skeletal/cardiac muscle       | -0.502925660435174  | 0.206266293786992    | 0.63843378885942   | NA            | NA       | ETN65502.1                          | myosin I XP_021697561.1                                                                                  | myosin light chain kinase 2, skeletal/cardiac muscle       |
| AAEL0080: senecionine N-oxygenase                                    | -0.502513939252767  | 0.00139801586940913  | 0.0536975940053796 | NA            | NA       | XP_019537918.1                      | PRE XP_001651284.1                                                                                       | senecionine N-oxygenase isoform X2                         |
| AAEL0138: protein singed                                             | -0.502253567951031  | 0.00148742157647722  | 0.0560953006014075 | NA            | NA       | NA                                  | XP_001664000.1                                                                                           | protein singed isoform X3                                  |
| AAEL0143: serine protease easter                                     | -0.502070693868437  | 0.0074260638810532   | 0.141410084049817  | NA            | NA       | NA                                  | XP_001648544.2                                                                                           | serine protease easter                                     |
| AAEL0281: NA                                                         | -0.501560048295533  | 0.00198241283809657  | 0.0693618362591811 | NA            | NA       | NA                                  | XP_021694158.1                                                                                           | uncharacterized protein LOC23687573 isoform X2             |
| AAEL0109: serum response factor homolog                              | -0.50110394062008   | 0.00768342404836219  | 0.142834411573796  | NA            | NA       | XP_019564799.1                      | PRE XP_021706604.1                                                                                       | serum response factor homolog isoform X3                   |
| AAEL0086: uncharacterized LOC5570879                                 | -0.500653148904676  | 0.0157810256406756   | 0.202259474938964  | NA            | NA       | KXJ76287.1                          | hypothei XP_001659394.1                                                                                  | uncharacterized protein LOC5570879                         |
| AAEL0133: activating molecule in BECN1-regulated autophagy protein 1 | -0.500149103395882  | 0.0501561736578128   | 0.356468207181388  | NA            | NA       | NA                                  | XP_001656679.2                                                                                           | activating molecule in BECN1-regulated autophagy protein 1 |
| AAEL0012: LIM domain transcription factor LMO4                       | -0.500104372273629  | 0.0845421372824725   | 0.441769873522608  | NA            | NA       | CRL01584.1                          | CLUMA_XP_021703037.1                                                                                     | LIM domain transcription factor LMO4                       |
| AAEL0260: NA                                                         | -0.499931266164488  | 0.0985395410278591   | 0.475490748053676  | NA            | NA       | NA                                  | 2NBM_A Chain A, Solution Nmr Structure Of Ligand Free Sterol Carrier Protein 2 Like 2 From Aedes Aegypti | NA                                                         |
| AAEL0003: uncharacterized oxidoreductase Yjmc                        | -0.498242162875562  | 0.0194683331317406   | 0.22702918113002   | NA            | NA       | KXJ81871.1                          | hypothei XP_021697897.1                                                                                  | uncharacterized protein LOC5575133                         |
| AAEL0131: uncharacterized LOC5577450                                 | -0.49820436434288   | 0.34178226031111     | 0.762438298723025  | NA            | NA       | NA                                  | XP_001663376.2                                                                                           | uncharacterized protein LOC5577450                         |
| AAEL0201: NA                                                         | -0.497880394334728  | 0.0472133081049421   | 0.346180765881814  | NA            | NA       | NA                                  | NA                                                                                                       | NA                                                         |
| AAEL0033: tankyrase                                                  | -0.497719293193444  | 0.0202077826402001   | 0.230709697090721  | NA            | NA       | KXJ69712.1                          | hypothei XP_019542977.1                                                                                  | tankyrase-like                                             |
| AAEL0038: uncharacterized LOC5579004                                 | -0.497224134655844  |                      |                    |               |          |                                     |                                                                                                          |                                                            |

|                                                                                   |                    |                      |                     |                         |                    |                                                                     |                                                                                                                |
|-----------------------------------------------------------------------------------|--------------------|----------------------|---------------------|-------------------------|--------------------|---------------------------------------------------------------------|----------------------------------------------------------------------------------------------------------------|
| AAEL01271 clotting factor B                                                       | -0.487309339949237 | 0.00214558451172441  | 0.0727761081152129  | NA                      | NA                 | KXJ69333.1 hypothe                                                  | XP_001662820.2clotting factor B                                                                                |
| AAEL00801 NA                                                                      | -0.486980043600692 | 0.00301625175244014  | 0.0867360894561068  | NA                      | NA                 | KXJ71600.1 hypothe                                                  | XP_001653094.2trypsin alpha-3                                                                                  |
| AAEL00991 uncharacterized LOC5572709                                              | -0.486941016212166 | 0.155916646788414    | 0.573884755986765   | NA                      | NA                 | NA                                                                  | XP_001660522.2uncharacterized protein LOC5572709                                                               |
| AAEL00761 transcription factor Maf8                                               | -0.486438292675652 | 0.0845314971311897   | 0.441769873522608   | NA                      | NA                 | KXJ82036.1 hypothe                                                  | XP_001658594.2transcription factor Maf8                                                                        |
| AAEL02161 NA                                                                      | -0.485984161113833 | 0.0328046213172052   | 0.284781250340492   | NA                      | NA                 | NA                                                                  | XP_021703742.1protein sickle isoform X4                                                                        |
| AAEL00681 lipid storage droplets surface-binding protein 2                        | -0.485600769215266 | 0.000402016380734339 | 0.0251656784729074  | NA                      | NA                 | KF840194.1 AGAPO0                                                   | XP_001658058.1lipid storage droplets surface-binding protein 2                                                 |
| AAEL01281 leucine-rich melanocyte differentiation-associated protein              | -0.485209358126672 | 0.030211425706389    | 0.280801691445466   | NA                      | NA                 | KXJ71395.1 hypothe                                                  | XP_021693055.1leucine-rich melanocyte differentiation-associated protein                                       |
| AAEL00994 uncharacterized LOC5572618                                              | -0.485159252001586 | 0.074323472996649    | 0.418818002133309   | NA                      | NA                 | NA                                                                  | XP_001660484.1uncharacterized protein LOC5572618                                                               |
| AAEL01861 NA                                                                      | -0.484495830870102 | 0.321696449855559    | 0.746595392577842   | NA                      | aag01100 ; aag NA  | ABF18219.1NADH dehydrogenase subunit 4 (mitochondrion)              |                                                                                                                |
| AAEL00801 muscle M-line assembly protein unc-89                                   | -0.484432138509482 | 0.00232113228178168  | 0.0747232890974067  | NA                      | NA                 | XP_019534696.1 PRE                                                  | XP_001658878.2muscle M-line assembly protein unc-89 isoform X1                                                 |
| AAEL00861 interferon-inducible double-stranded RNA-dependent protein kinase acti  | -0.484379125170969 | 0.000902542676033498 | 0.0413193578047436  | NA                      | NA                 | KXJ72239.1 hypothe                                                  | XP_021701497.1interferon-inducible double-stranded RNA-dependent protein kinase activator A homolog isoform X1 |
| AAEL00201 putative odorant-binding protein A10                                    | -0.484209262925222 | 0.06725575523991162  | 0.4007529665455     | NA                      | NA                 | NA                                                                  | XP_021703244.1putative odorant-binding protein A10                                                             |
| AAEL00861 unconventional myosin-VIIa                                              | -0.483999155064225 | 0.000745696098030595 | 0.037456882266592   | NA                      | NA                 | XP_019549776.1 PRE                                                  | XP_021702187.1unconventional myosin-VIIa isoform X2                                                            |
| AAEL00621 elongation of very long chain fatty acids protein AAEL008004            | -0.483031322285012 | 0.0127986291987214   | 0.182311123663521   | 62                      | NA                 | ETN58473.1 Elongati                                                 | XP_021703498.1elongation of very long chain fatty acids protein AAEL008004                                     |
| AAEL01441 probable cytochrome P450 304a1                                          | -0.482196996829903 | 0.0321166511598773   | 0.284442054201394   | NA                      | NA                 | NA                                                                  | XP_001648727.1probable cytochrome P450 304a1                                                                   |
| AAEL02411 NA                                                                      | -0.482039865138218 | 0.264240808394367    | 0.698659663885272   | NA                      | NA                 | NA                                                                  | XP_001653501.2 FAD-linked sulphydryl oxidase ALR                                                               |
| AAEL00671 uncharacterized transmembrane protein DDB_G0289901                      | -0.480951794450563 | 0.1169619586869225   | 0.514582987743323   | NA                      | NA                 | KXJ83066.1 hypothe                                                  | XP_021697099.1uncharacterized transmembrane protein DDB_G0289901                                               |
| AAEL01091 protein tweety                                                          | -0.480633461617959 | 0.220483885560918    | 0.652412844728166   | NA                      | NA                 | KF848947.1 AGAPO0                                                   | XP_001655040.1protein tweety isoform X1                                                                        |
| AAEL00221 uncharacterized LOC5573957                                              | -0.480426896357102 | 0.136375712310867    | 0.545589928345625   | NA                      | NA                 | KXJ71507.1 hypothe                                                  | XP_001654995.2uncharacterized protein LOC5573957 isoform X2                                                    |
| AAEL00511 laminin subunit gamma-1                                                 | -0.48025586713526  | 0.000218433817815131 | 0.0181083602840976  | NA                      | aag04512           | XP_001843323.1 lam                                                  | XP_001650503.2laminin subunit gamma-1                                                                          |
| AAEL01961 NA                                                                      | -0.479748986545598 | 0.0175656318645254   | 0.214955509175633   | NA                      | NA                 | NA                                                                  | XP_021710343.1extracellular sulfatase SULF-1 homolog                                                           |
| AAEL02621 NA                                                                      | -0.479567602234049 | 0.480011266299638    | 0.845454613425911   | NA                      | NA                 | NA                                                                  | NA                                                                                                             |
| AAEL00101 synaptic vesicle glycoprotein 2B                                        | -0.479404464442299 | 0.0044133879817194   | 0.103600876583618   | NA                      | NA                 | KXJ75630.1 hypothe                                                  | XP_021693930.1synaptic vesicle glycoprotein 2B                                                                 |
| AAEL00261 testisin                                                                | -0.479260204936594 | 0.000907205115426895 | 0.0413193578047436  | NA                      | NA                 | KXJ68960.1 hypothe                                                  | XP_019561387.1 vitamin K-dependent protein C-like                                                              |
| AAEL01441 M-phase inducer phosphatase                                             | -0.479057044067583 | 0.101675149048627    | 0.483848092317179   | NA                      | NA                 | NA                                                                  | XP_021713169.1M-phase inducer phosphatase                                                                      |
| AAEL02621 NA                                                                      | -0.47862550935655  | 0.00233865542926028  | 0.0747232890974067  | NA                      | NA                 | NA                                                                  | XP_021701099.1 myosin heavy chain, muscle                                                                      |
| AAEL01321 uncharacterized LOC5577531                                              | -0.477541215034693 | 0.0505560625424741   | 0.357859143618638   | NA                      | NA                 | NA                                                                  | XP_001663415.1uncharacterized protein LOC5577531                                                               |
| AAEL00331 extensin                                                                | -0.477467514564312 | 0.00265741029071378  | 0.0792437883464128  | NA                      | NA                 | KXJ73647.1 hypothe                                                  | XP_019560238.1 extensin-like                                                                                   |
| AAEL00211 neprilysin-2                                                            | -0.476947315545239 | 0.00470643087871106  | 0.108001438767828   | NA                      | NA                 | KXJ77254.1 hypothe                                                  | XP_001848831.1endothelin-converting enzyme 1                                                                   |
| AAEL00641 suppressor of hairless protein                                          | -0.476049722867921 | 0.0588301017907836   | 0.380164744858701   | NA                      | aag04330           | XP_018567908.1 sup                                                  | XP_001657802.1suppressor of hairless protein                                                                   |
| AAEL01271 dihydroxyacetone phosphate acyltransferase                              | -0.475875395933221 | 0.0305371441237063   | 0.281224109837052   | 00564 ; 00561           | aag04146 ; aag     | KXJ67969.1 hypothe                                                  | XP_001656249.1dihydroxyacetone phosphate acyltransferase                                                       |
| AAEL01251 NA                                                                      | -0.475785533041305 | 0.268147433204876    | 0.704184172798867   | NA                      | NA                 | XP_019551082.1 PRE                                                  | XP_021701749.1histidine-rich glycoprotein isoform X2                                                           |
| AAEL00311 uncharacterized LOC5577231                                              | -0.475613431992301 | 0.00801015961531024  | 0.144528409372715   | NA                      | NA                 | KXJ75153.1 hypothe                                                  | XP_021706463.1amyloid protein-binding protein 2-like                                                           |
| AAEL00141 dual specificity protein phosphatase 10                                 | -0.475415891699448 | 0.00227008642847295  | 0.07407074108366112 | NA                      | aag04013 ; aag NA  | XP_001654548.2dual specificity protein phosphatase 7 isoform X1     |                                                                                                                |
| AAEL01081 transmembrane protein 235                                               | -0.474614375303882 | 0.0135621179945657   | 0.187825791015408   | NA                      | NA                 | XP_312594.1 AGAPO                                                   | XP_001655028.1transmembrane protein 235                                                                        |
| AAEL00131 zinc finger protein 628                                                 | -0.474549702018942 | 0.0523359349875898   | 0.362633125106993   | NA                      | NA                 | KXJ71231.1 hypothe                                                  | XP_021708071.1zinc finger protein 628                                                                          |
| AAEL02331 NA                                                                      | -0.474372017279359 | 0.0026464022979809   | 0.0792437883464128  | NA                      | NA                 | NA                                                                  | XP_021706161.1uncharacterized protein LOC110678038 isoform X1                                                  |
| AAEL00801 sushi, von Willebrand factor type A, EGF and pentraxin domain-containin | -0.474167786802596 | 0.0196800535511039   | 0.227335564593981   | NA                      | NA                 | XP_019532068.1 PRE                                                  | XP_021700031.1sushi, von Willebrand factor type A, EGF and pentraxin domain-containing protein 1 isoform X1    |
| AAEL00191 NA                                                                      | -0.474125475927814 | 0.0617665729315173   | 0.387441038933757   | NA                      | aag04144           | NA                                                                  | XP_021695333.1neural Wiskott-Aldrich syndrome protein                                                          |
| AAEL00701 Kv channel-interacting protein 4                                        | -0.474100202919648 | 0.166119407039011    | 0.58439853413553    | NA                      | NA                 | ETN67180.1 calsenili                                                | XP_001652499.1kv channel-interacting protein 4 isoform X2                                                      |
| AAEL00481 uncharacterized LOC5565491                                              | -0.473750335723385 | 0.0029747697891169   | 0.085813841164621   | NA                      | NA                 | KXJ69240.1 hypothe                                                  | XP_021694725.1uncharacterized protein LOC5565491                                                               |
| AAEL00761 uncharacterized LOC5569452                                              | -0.473213670091276 | 0.0814865044122297   | 0.434941307193351   | NA                      | NA                 | ETN65987.1 hypothe                                                  | XP_019561885.1 FERM domain-containing protein 8-like                                                           |
| AAEL00221 adult enhancer factor 1                                                 | -0.47315428506938  | 0.0780391440897283   | 0.42745012137719    | NA                      | NA                 | XP_019531487.2 PRE                                                  | XP_001661223.1zinc finger protein 569 isoform X1                                                               |
| AAEL02261 NA                                                                      | -0.472805906708231 | 0.114292438342943    | 0.508373266905823   | 790                     | aag00790           | NA                                                                  | XP_021694857.1molybdenum cofactor sulfuras 3 isoform X1                                                        |
| AAEL02641 NA                                                                      | -0.472506971708472 | 0.0750984581923871   | 0.420011710715769   | 00966 ; 00770 ; 00290 ; | aag01100 ; aag NA  | XP_021693528.1branched-chain-amino-acid aminotransferase, cytosolic |                                                                                                                |
| AAEL00581 UPF0676 protein C1494.01                                                | -0.471884653769879 | 0.00750802539324779  | 0.142155587215123   | NA                      | NA                 | XP_001845189.1 con                                                  | XP_021712815.1UPF0676 protein C1494.01                                                                         |
| AAEL01421 gastrula zinc finger protein XICGF57.1                                  | -0.471042547008791 | 0.270161780689312    | 0.706082729045778   | NA                      | NA                 | XP_021707646.1gastrula zinc finger protein XICGF57.1                |                                                                                                                |
| AAEL00901 NADH dehydrogenase [ubiquinone] 1 beta subcomplex subunit 5, mitoch     | -0.470239364432169 | 0.00362131054673944  | 0.0923083092828153  | NA                      | aag01100 ; aag     | KXJ68957.1 hypothe                                                  | XP_001659703.1NADH dehydrogenase [ubiquinone] 1 beta subcomplex subunit 5, mitochondrial                       |
| AAEL02251 NA                                                                      | -0.46966540114492  | 0.282795514639529    | 0.715753918648043   | NA                      | NA                 | NA                                                                  | XP_021708912.1serine protease snake                                                                            |
| AAEL01181 uncharacterized LOC5575405                                              | -0.469517045429589 | 0.000893432829755291 | 0.0413193578047436  | NA                      | NA                 | KXJ78949.1 hypothe                                                  | XP_021704590.1uncharacterized protein LOC5575405                                                               |
| AAEL00331 uncharacterized protein C1orf131 homolog                                | -0.468736137791707 | 0.159687610500135    | 0.577560236664366   | NA                      | NA                 | KXJ71152.1 hypothe                                                  | XP_021708057.1uncharacterized protein C1orf131 homolog                                                         |
| AAEL00051 C-type lectin 37Da                                                      | -0.467597594857064 | 0.00796773925607196  | 0.1445284093727215  | NA                      | NA                 | XP_019931003.1 PRE                                                  | XP_001647955.1C-type lectin 37Da                                                                               |
| AAEL00601 major facilitator superfamily domain-containing protein 1               | -0.466970968080261 | 0.00291116327912183  | 0.0845181302823045  | NA                      | NA                 | XP_019540843.1 PRE                                                  | XP_001651759.1major facilitator superfamily domain-containing protein 1 isoform X1                             |
| AAEL02021 NA                                                                      | -0.466924492893531 | 0.0524805966962206   | 0.362633125106993   | NA                      | NA                 | NA                                                                  | XP_021711503.1putative epidermal cell surface receptor isoform X2                                              |
| AAEL01431 collectin-11                                                            | -0.466021780588725 | 0.0183030532505909   | 0.219588912662329   | NA                      | NA                 | NA                                                                  | XP_019557186.1 C-type lectin 37Db-like                                                                         |
| AAEL00411 uncharacterized LOC5564131                                              | -0.465621286618106 | 0.000350545367057473 | 0.0223223256699418  | NA                      | NA                 | KXJ83382.1 hypothe                                                  | XP_021711054.1uncharacterized protein LOC5564131                                                               |
| AAEL01521 chymotrypsin-2                                                          | -0.465519302867079 | 0.0966011668483582   | 0.470579109231653   | NA                      | NA                 | ABF18054.1salivary chymotrypsin-like enzyme                         |                                                                                                                |
| AAEL00271 protein extra-macrochaetae                                              | -0.464361735394031 | 0.00338089167381138  | 0.0897536781871071  | aag04350                | XP_001848438.1 con | XP_001662181.2protein extra-macrochaetae                            |                                                                                                                |
| AAEL01011 uncharacterized LOC5572961                                              | -0.463811018937511 | 0.00609812936781141  | 0.127824570484284   | NA                      | NA                 | NA                                                                  | XP_001654290.2uncharacterized protein LOC5572961                                                               |
| AAEL00711 facilitated trehalose transporter Tret1                                 | -0.463651859071282 | 0.00327382851766391  | 0.0891942138367879  | NA                      | NA                 | XP_001850643.1 sug                                                  | XP_001658147.1facilitated trehalose transporter Tret1                                                          |
| AAEL02011 NA                                                                      | -0.463324200       |                      |                     |                         |                    |                                                                     |                                                                                                                |

|                                                                               |                    |                      |                    |                         |                                                                     |                                                                                                                  |
|-------------------------------------------------------------------------------|--------------------|----------------------|--------------------|-------------------------|---------------------------------------------------------------------|------------------------------------------------------------------------------------------------------------------|
| AAEL0050: endoplasmic reticulum aminopeptidase 2                              | -0.453884550978744 | 0.0423199348096262   | 0.323939778330243  | NA                      | NA                                                                  | XP_019932513.1 PRE XP_021693909.1endoplasmic reticulum aminopeptidase 2 isoform X1                               |
| AAEL0000: dnaI homolog subfamily C member 17                                  | -0.453748484201485 | 0.0926215942667955   | 0.462398967492132  | NA                      | NA                                                                  | KFB36168.1 AGAP00 XP_001647945.1dnaI homolog subfamily C member 17                                               |
| AAEL02681 NA                                                                  | -0.453645271258329 | 0.187722235141732    | 0.614740216289758  | NA                      | NA                                                                  | XP_021694924.1uncharacterized protein LOC110674815                                                               |
| AAEL0137: protein obstructor-E                                                | -0.453264163411616 | 0.182023804388103    | 0.608200090043328  | NA                      | NA                                                                  | XP_001663971.1protein obstructor-E isoform X1                                                                    |
| AAEL0107: calexitin-1                                                         | -0.452623429450427 | 0.337991537056322    | 0.289320755720212  | NA                      | NA                                                                  | XP_001847423.1 con XP_019553998.1 calexitin-1-like                                                               |
| AAEL0227: NA                                                                  | -0.452302694640663 | 0.0304749095210355   | 0.281224109837052  | NA                      | NA                                                                  | XP_021699787.1solute carrier family 2, facilitated glucose transporter member 3                                  |
| AAEL0011: phosphoserine phosphatase                                           | -0.452155811901577 | 0.00971455468406031  | 0.1602031040350955 | 00680 ; 00260           | aag01100 ; aag                                                      | XP_001652419.1phosphoserine phosphatase isoform X1                                                               |
| AAEL0024: transcription factor Ken 2                                          | -0.451702248481146 | 0.0752071170668593   | 0.420011717015769  | NA                      | NA                                                                  | KFB43460.1 AGAP00 XP_021709590.1transcription factor Ken 2                                                       |
| AAEL0084: uncharacterized LOC5579397                                          | -0.451224837362415 | 0.0015027487715205   | 0.0562125780306163 | NA                      | NA                                                                  | KXJ69317.1 hypothei XP_001659275.1uncharacterized protein LOC5579397 isoform X1                                  |
| AAEL0049: galactosylgalactosylxylosylprotein 3-beta-glucuronosyltransferase S | -0.450025300847712 | 0.187994132740341    | 0.614974052426811  | NA                      | NA                                                                  | KXJ79350.1 hypothei XP_001650141.1galactosylgalactosylxylosylprotein 3-beta-glucuronosyltransferase S isoform X1 |
| AAEL0091: glutathione synthetase                                              | -0.449847931789198 | 0.000861580652903326 | 0.0409667993696665 | 00270 ; 00480           | aag01100 ; aag                                                      | KXJ68522.1 hypothei XP_001653705.2glutathione synthetase isoform X1                                              |
| AAEL0061: uncharacterized LOC5567431                                          | -0.449486114612118 | 0.00279776259531615  | 0.0819904821722905 | NA                      | NA                                                                  | XP_021707988.1uncharacterized protein LOC5567431 isoform X1                                                      |
| AAEL0182: NA                                                                  | -0.448613738277132 | 0.00436811076275269  | 0.103594442242845  | NA                      | NA                                                                  | XP_021695711.1carboxypeptidase D isoform X6                                                                      |
| AAEL0134: retinol dehydrogenase 11                                            | -0.447955675025309 | 0.0512224188046148   | 0.359690131564899  | NA                      | NA                                                                  | XP_001663677.1retinol dehydrogenase 12 isoform X1                                                                |
| AAEL0221: NA                                                                  | -0.447073904817838 | 0.0434292458837651   | 0.329189390597501  | NA                      | NA                                                                  | XP_021708781.1dehydrogenase/reductase SDR family member on chromosome X                                          |
| AAEL0115: serine/threonine-protein kinase OSR1                                | -0.446249109490225 | 0.215498080483087    | 0.64825542223124   | 04151 ; 05165 ; 04714 ; | NA                                                                  | ETN62842.1 serine/threonine-protein kinase OSR1                                                                  |
| AAEL0228: NA                                                                  | -0.44565948047523  | 0.00515860964853556  | 0.114938319578267  | NA                      | NA                                                                  | NA                                                                                                               |
| AAEL0282: NA                                                                  | -0.445279287666837 | 0.250224619986661    | 0.683335640523162  | NA                      | NA                                                                  | NA                                                                                                               |
| AAEL0180: NA                                                                  | -0.44523705911239  | 0.240855475230562    | 0.675511149976115  | NA                      | NA                                                                  | XP_021707737.1synaptotagmin-6 isoform X2                                                                         |
| AAEL0146: probable cytochrome P450 9F2                                        | -0.444291554481476 | 0.00103064761186967  | 0.0447359402095507 | NA                      | NA                                                                  | XP_001649097.2probable cytochrome P450 9F2                                                                       |
| AAEL0275: NA                                                                  | -0.444256057252624 | 0.22866462517368     | 0.657521826528382  | NA                      | NA                                                                  | XP_011493059.2mitochondrial inner membrane protein COX18                                                         |
| AAEL0030: WD repeat-containing protein 5                                      | -0.444100475963465 | 0.0397945851885966   | 0.313706406586116  | NA                      | NA                                                                  | ETN59784.1 wd-repe XP_001662893.1WD repeat-containing protein 5                                                  |
| AAEL0091: mpv17-like protein                                                  | -0.44364849413904  | 0.00304508081635924  | 0.0867725357502717 | aag04146                | ETN60157.1 hypothei                                                 | XP_021692972.1mpv17-like protein                                                                                 |
| AAEL0173: mucin-5AC                                                           | -0.443148869012462 | 0.024781706123194    | 0.258221227488557  | NA                      | NA                                                                  | XP_019547824.1 mucin-5AC-like                                                                                    |
| AAEL0082: NADPH-dependent 1-acyldihydroxyacetone phosphate reductase          | -0.443082451060913 | 0.01146897378031     | 0.172833431546296  | NA                      | NA                                                                  | KXJ70948.1 hypothei XP_001659060.1NADPH-dependent 1-acyldihydroxyacetone phosphate reductase                     |
| AAEL0049: PDZ domain-containing protein 2                                     | -0.442637523908433 | 0.0214365977365421   | 0.23863172323164   | NA                      | NA                                                                  | XP_021710873.1uncharacterized protein LOC5565736 isoform X1                                                      |
| AAEL0227: NA                                                                  | -0.442461698229466 | 0.1805917111485961   | 0.605944990070163  | NA                      | NA                                                                  | XP_021698597.1serine protease 42                                                                                 |
| AAEL0131: ankyrin-3                                                           | -0.442437661124944 | 0.000645214279900686 | 0.0341621442326704 | NA                      | NA                                                                  | XP_019541717.1 ankyrin-3-like                                                                                    |
| AAEL0109: uncharacterized LOC5574131                                          | -0.442027895789552 | 0.216867852829857    | 0.649748124914163  | NA                      | NA                                                                  | CAY77162.1ladipokinetic hormone 2 preprohormone                                                                  |
| AAEL0072: muscle M-line assembly protein unc-89                               | -0.441417396229223 | 0.00949133356121765  | 0.158773875613038  | NA                      | NA                                                                  | KFB35415.1 AGAP00 XP_021706828.1muscle M-line assembly protein unc-89                                            |
| AAEL0090: peroxisomal N(1)-acetyl-spermine/spermidine oxidase                 | -0.441351917203625 | 0.178602552624952    | 0.604117469532757  | NA                      | NA                                                                  | KXJ78901.1 hypothei XP_001653661.2peroxisomal N(1)-acetyl-spermine/spermidine oxidase                            |
| AAEL0214: NA                                                                  | -0.44064342366087  | 0.21939917885578     | 0.652412844728166  | NA                      | NA                                                                  | XP_021700199.1lachesin isoform X1                                                                                |
| AAEL0071: transmembrane protease serine 9                                     | -0.439773188245176 | 0.0259493304546546   | 0.262690581786284  | NA                      | NA                                                                  | KXJ72772.1 hypothei XP_021698683.1transmembrane protease serine 9                                                |
| AAEL0025: OTU domain-containing protein 6B                                    | -0.439755810191847 | 0.0279680534019454   | 0.271500221524543  | NA                      | NA                                                                  | KXJ70527.1 hypothei XP_001655459.2OTU domain-containing protein 6B                                               |
| AAEL0082: alpha-tocopherol transfer protein                                   | -0.439639816156722 | 0.3172064717858159   | 0.745684464362801  | NA                      | NA                                                                  | KXJ68104.1 hypothei XP_001659078.2alpha-tocopherol transfer protein                                              |
| AAEL0012: protein takeout                                                     | -0.439294344279791 | 0.0029151567438916   | 0.0845181302823045 | NA                      | NA                                                                  | ETN63778.1 hypothei XP_001653029.1protein takeout                                                                |
| AAEL0066: uncharacterized LOC5568164                                          | -0.439251667548024 | 0.0755850813756019   | 0.420516274980827  | 901 NA                  | XP_001866179.1 Juv                                                  | XP_001866179.1Juvenile hormone-inducible protein                                                                 |
| AAEL0061: nicalin-1                                                           | -0.439062200110079 | 0.238214348005963    | 0.6728085706937    | NA                      | NA                                                                  | XP_00184056.1 hypothei XP_019542927.1 nicalin-1                                                                  |
| AAEL0196: NA                                                                  | -0.438966598491211 | 0.00315343379806122  | 0.0884520619086676 | NA                      | NA                                                                  | XP_021700494.1LOW QUALITY PROTEIN: uncharacterized protein LOC5576948                                            |
| AAEL0033: axin                                                                | -0.438947520460441 | 0.0199720720481942   | 0.228870494380427  | aag04310                | XP_019530177.1 PRE XP_021709960.1axin isoform X1                    |                                                                                                                  |
| AAEL0262: NA                                                                  | -0.438898307325176 | 0.0709370590055844   | 0.409506895880945  | NA                      | NA                                                                  | XP_021699531.1corticotropin-releasing factor-binding protein                                                     |
| AAEL0081: ubiquitin-associated domain-containing protein 1                    | -0.438801723410879 | 0.214736464848899    | 0.648028428468258  | NA                      | NA                                                                  | KXJ83843.1 hypothei XP_001653124.2ubiquitin-associated domain-containing protein 1 isoform X1                    |
| AAEL0059: condensin complex subunit 2                                         | -0.438556695410624 | 0.0615201660175695   | 0.38668618011863   | NA                      | NA                                                                  | KXJ75812.1 hypothei XP_001651734.2condensin complex subunit 2                                                    |
| AAEL0009: ILRP                                                                | -0.438218613908699 | 0.040164245294943    | 0.314545859748141  | aag04150 ; aag          | KXJ69019.1 hypothei                                                 | AB164118.2insulin-like peptide 2 precursor                                                                       |
| AAEL0073: serine-rich adhesin for platelets                                   | -0.438110299971544 | 0.29025948250814     | 0.721952579380462  | NA                      | NA                                                                  | XP_01952579300462.1 uncharacterized serine-rich protein C215.13-like                                             |
| AAEL0023: Krueppel homolog 1                                                  | -0.43781246476555  | 0.0075387879331645   | 0.142155587215123  | NA                      | NA                                                                  | KXJ84537.1 hypothei XP_001655162.2Krueppel homolog 1 isoform X1                                                  |
| AAEL0126: uncharacterized LOC5576660                                          | -0.437445296878387 | 0.0830272024662364   | 0.43799462600371   | 901 NA                  | NA                                                                  | EAT35127.1AAEL012694                                                                                             |
| AAEL0057: uncharacterized LOC5567040                                          | -0.436890920378507 | 0.00102505078942255  | 0.0447038737642953 | NA                      | NA                                                                  | KXJ80703.1 hypothei XP_001651439.2uncharacterized protein LOC5567040                                             |
| AAEL0117: protein abrupt                                                      | -0.436793840990488 | 0.0497864817625685   | 0.355143569906322  | NA                      | NA                                                                  | KXJ82558.1 hypothei XP_021706049.1protein abrupt                                                                 |
| AAEL0198: NA                                                                  | -0.436252193197221 | 0.009091716621907379 | 0.0413193578047436 | NA                      | NA                                                                  | XP_021696607.1double-stranded RNA-binding protein Staufen homolog 2                                              |
| AAEL0267: NA                                                                  | -0.436191345845644 | 0.0203018660957447   | 0.231210113630003  | NA                      | NA                                                                  | XP_021696257.1retinaldehyde-binding protein 1 isoform X2                                                         |
| AAEL0255: NA                                                                  | -0.436082770764445 | 0.0071106478771275   | 0.137861850831157  | NA                      | NA                                                                  | XP_021707711.1uncharacterized protein C11D3.03c                                                                  |
| AAEL0150: zinc finger protein 250                                             | -0.435492339490205 | 0.18484955414201     | 0.612086485554846  | NA                      | NA                                                                  | XP_021701753.1zinc finger protein 250                                                                            |
| AAEL0016: actin, muscle                                                       | -0.435321586329105 | 0.00134849936841192  | 0.052138198269439  | aag04145 ; aag          | ABW03225.1 beta ac NP_001296055.1actin, muscle                      |                                                                                                                  |
| AAEL0049: proclotting enzyme                                                  | -0.435056649249105 | 0.195287944497963    | 0.62789645886452   | NA                      | NA                                                                  | KXJ76539.1 hypothei XP_001650120.1proclotting enzyme                                                             |
| AAEL0036: acyl-CoA Delta(11) desaturase                                       | -0.434197888636562 | 0.00430789217776926  | 0.102697471035836  | aag01100 ; aag          | ETN58289.1 stearyl XP_001657081.2acyl-CoA Delta(11) desaturase      |                                                                                                                  |
| AAEL0022: adult cuticle protein 1                                             | -0.434066876794702 | 0.196058160595351    | 0.629273524171057  | NA                      | NA                                                                  | ETN66068.1 cuticle p XP_001654960.1adult cuticle protein 1                                                       |
| AAEL0202: NA                                                                  | -0.433520921514732 | 0.219615395344128    | 0.652412844728166  | NA                      | NA                                                                  | XP_021698385.1protein N-terminal glutamine amidohydrolase                                                        |
| AAEL0133: uncharacterized LOC5577589                                          | -0.432166507754735 | 0.357762057666812    | 0.773736338358957  | NA                      | NA                                                                  | XP_001656582.2uncharacterized protein LOC5577589                                                                 |
| AAEL0237: NA                                                                  | -0.432125376057956 | 0.015270905660979    | 0.201233331073453  | NA                      | NA                                                                  | NA                                                                                                               |
| AAEL0218: NA                                                                  | -0.431214776923002 | 0.0157816021523773   | 0.202259474938964  | NA                      | NA                                                                  | XP_019534145.1 phosphoinositide 3-kinase adapter protein 1-like isoform X2                                       |
| AAEL0112: muscle calcium channel subunit alpha-1                              | -0.431074655394179 | 0.00146018511379511  | 0.0552947465726032 | NA                      | NA                                                                  | XP_021699866.1muscle calcium channel subunit alpha-1 isoform X1                                                  |
| AAEL0279: NA                                                                  | -0.430987100934284 | 0.113902733480587    | 0.507324759674907  | NA                      | NA                                                                  | NA                                                                                                               |
| AAEL0073: UDP-glucose 4-epimerase                                             | -0.430738521885822 | 0.00107504651483613  | 0.0460119908349863 | 00052 ; 00520           | aag01100 ; aag                                                      | KFB49841.1 AGAP01 XP_001652750.1UDP-glucose 4-epimerase                                                          |
| AAEL0048: NA                                                                  | -0.43070457952787  | 0.00815021575262285  | 0.145627738554632  | NA                      | NA                                                                  | KXJ69661.1 hypothei ABF18045.1putative secreted salivary protein                                                 |
| AAEL0054: WD repeat-containing protein 91                                     | -0.430559000713416 | 0.187136069647593    | 0.614196367514984  | NA                      | NA                                                                  | XP_019528862.1 PRE XP_001650856.2WD repeat-containing protein 91                                                 |
| AAEL0034: regulator of microtubule dynamics protein 1                         | -0.430404303358985 | 0.00048974823919288  | 0.037456882266592  | NA                      | NA                                                                  | ETN67690.1 hypothei XP_001656800.1regulator of microtubule dynamics protein 1                                    |
| AAEL0279: NA                                                                  | -0.43018108127071  | 0.245602539794739    | 0.679727114240672  | NA                      | NA                                                                  | NA                                                                                                               |
| AAEL0127: cytochrome P450 4C1                                                 | -0.430090463646246 | 0.184644732233015    | 0.612043911074917  | NA                      | XP_001867815.1 cyt. XP_021706946.1cytochrome P450 4C1               |                                                                                                                  |
| AAEL0173: probable G-protein coupled receptor Mth-like 1                      | -0.429863080211663 | 0.0483609885293778   | 0.35027523096122   | NA                      | NA                                                                  | XP_011493653.2probable G-protein coupled receptor Mth-like 1 isoform X1                                          |
| AAEL0179: NA                                                                  | -0.429433789121649 | 0.136945323271719    | 0.545800678248029  | NA                      | NA                                                                  | XP_021713378.1uncharacterized protein LOC110681571                                                               |
| AAEL0080: cartilage oligomeric matrix protein                                 | -0.42930650821774  | 0.0198680404624362   | 0.228246826885565  | aag04145 ; aag          | ETN67430.1 thromb XP_021700042.1cartilage oligomeric matrix protein |                                                                                                                  |
| AAEL0235: NA                                                                  | -0.429035513786913 | 0.00126852346898576  | 0.0500985105648368 | NA                      | NA                                                                  | XP_021710374.1myb-like protein V                                                                                 |
| AAEL0037: glucosylceramidase                                                  | -0.42903383449919  | 0.0319935858921165   | 0.284442054201394  | aag01100 ; aag          | KXJ81602.1 hypothei                                                 | XP_019532306.1 glucosylceramidase-like                                                                           |
| AAEL0023: chymotrypsin-1                                                      | -0.428626076755883 | 0.0570277509361346   | 0.375057077651547  | NA                      | NA                                                                  | KXJ76377.1 hypothei XP_019526019.1 chymotrypsin-2-like                                                           |
| AAEL0230: NA                                                                  | -0.428600942791563 | 0.274580073935672    | 0.710341816237294  | NA                      | NA                                                                  | XP_021698234.1protein G12                                                                                        |
| AAEL0085: NA                                                                  | -0.428215397146785 | 0.14842454305731     | 0.562679383080301  | NA                      | NA                                                                  | XP_001659358.2transcription factor grauzone                                                                      |
| AAEL0010: regucalcin                                                          | -0.427949014081902 | 0.00250373900779991  | 0.077313441267611  | NA                      | NA                                                                  | KXJ72638.1 hypothei XP_001657883.2regucalcin isoform X1                                                          |
| AAEL0021: adult cuticle protein 1                                             | -0.427848439347406 | 0.00440180688078159  | 0.103594442242845  | NA                      | XP_001654939.2adult cuticle protein 1                               |                                                                                                                  |
| AAEL0127: RNA-binding protein MEX3B                                           | -0.427690795393943 | 0.245703786568234    | 0.679727114240672  | NA                      | NA                                                                  | KXJ83513.1 hypothei XP_001662827.2RNA-binding protein MEX3B                                                      |
| AAEL0261: NA                                                                  | -0.427539797130663 | 0.00981374832293448  | 0.160973461796155  | NA                      | NA                                                                  | NA                                                                                                               |
| AAEL0208: NA                                                                  | -0.42648381424696  | 0.0344117613355087   | 0.293579823070091  | NA                      | NA                                                                  | XP_021696705.1tyrosine-protein kinase PR2                                                                        |

|                                                                        |                    |                     |                    |                         |                                                                            |                                                                                                |                                                                                                      |
|------------------------------------------------------------------------|--------------------|---------------------|--------------------|-------------------------|----------------------------------------------------------------------------|------------------------------------------------------------------------------------------------|------------------------------------------------------------------------------------------------------|
| AAEL0277? NA                                                           | -0.426292818370316 | 0.040908727737154   | 0.3184789447016    | NA                      | NA                                                                         | NA                                                                                             | NA                                                                                                   |
| AAEL0279? NA                                                           | -0.42612659950808  | 0.00118129930480258 | 0.0480987442601474 | NA                      | NA                                                                         | NA                                                                                             | XP_021693362.1sarcalumenin isoform X1                                                                |
| AAEL0062? uncharacterized LOC5567679                                   | -0.425622015249818 | 0.00411228041049078 | 0.0998448663254252 | NA                      | NA                                                                         | NA                                                                                             | XP_019545771.1 PRE XP_019545771.1 UPF0746 protein DDB_G0281095 isoform X1                            |
| AAEL0038? SNF-related serine/threonine-protein kinase                  | -0.424617095425659 | 0.00314371054208672 | 0.0884520619086676 | NA                      | NA                                                                         | NA                                                                                             | XP_001845267.1 seri XP_001664275.2SNF-related serine/threonine-protein kinase                        |
| AAEL0068? protein lin-37 homolog                                       | -0.424056984347939 | 0.0994376609482691  | 0.478312852561358  | NA                      | NA                                                                         | NA                                                                                             | KFB43323.1 AGAP00_XP_001652295.2protein lin-37 homolog                                               |
| AAEL0210? NA                                                           | -0.423993199487748 | 0.346826379127269   | 0.765398366276275  | NA                      | NA                                                                         | NA                                                                                             | KFB52530.1AGAP009206-like protein                                                                    |
| AAEL0031? ig-like and fibronectin type-III domain-containing protein 1 | -0.423842990915609 | 0.0020344951644834  | 0.0709144867559708 | NA                      | NA                                                                         | ETN61421.1 hypothe XP_021707105.1lg-like and fibronectin type-III domain-containing protein 1  |                                                                                                      |
| AAEL0060? uncharacterized LOC5567333                                   | -0.423700055549094 | 0.0158532389206684  | 0.202894999371337  | NA                      | NA                                                                         | KXJ77289.1 hypothe XP_001651757.2uncharacterized protein LOC5567333                            |                                                                                                      |
| AAEL0228? NA                                                           | -0.423179302871217 | 0.0492888179048461  | 0.352961636078127  | NA                      | NA                                                                         | NA                                                                                             | XP_021711532.1putative polypeptide N-acetylgalactosaminyltransferase 9                               |
| AAEL0182? NA                                                           | -0.423049584741155 | 0.313734625454969   | 0.74451110779113   | NA                      | NA                                                                         | NA                                                                                             | XP_021698304.1potassium voltage-gated channel subfamily KQT member 1 isoform X3                      |
| AAEL0099? uncharacterized LOC5572722                                   | -0.422718250233909 | 0.0554744852393016  | 0.37071620419176   | NA                      | NA                                                                         | NA                                                                                             | XP_001660538.2uncharacterized protein LOC5572722                                                     |
| AAEL0131? open rectifier potassium channel protein 1                   | -0.422484036297649 | 0.0127564802516259  | 0.182308324322341  | NA                      | NA                                                                         | NA                                                                                             | XP_021710157.1open rectifier potassium channel protein 1 isoform X1                                  |
| AAEL0098? low-density lipoprotein receptor-related protein 2           | -0.422297723535919 | 0.00414773061072013 | 0.100176947716133  | NA                      | NA                                                                         | NA                                                                                             | XP_001660469.2low-density lipoprotein receptor-related protein 2 isoform X3                          |
| AAEL0012? probable protein 5-acyltransferase 23                        | -0.422230447684933 | 0.157240451748005   | 0.574474189691589  | NA                      | NA                                                                         | XP_019535906.1 PRE XP_021695344.1probable protein 5-acyltransferase 23                         |                                                                                                      |
| AAEL0088? probable cytochrome P450 6d5                                 | -0.42151149196787  | 0.0667215744428961  | 0.399540230684495  | NA                      | NA                                                                         | KXJ83992.1 hypothe XP_001653509.1probable cytochrome P450 6d5                                  |                                                                                                      |
| AAEL0194? NA                                                           | -0.420686202353339 | 0.136796171586155   | 0.545589928345625  | 534                     | aag01100 ; aag NA                                                          | XP_019560244.1 exostosin-1                                                                     |                                                                                                      |
| AAEL0026? 72 kDa type IV collagenase                                   | -0.420661427238336 | 0.0135417792733056  | 0.187825791015408  | NA                      | NA                                                                         | KXJ73279.1 hypothe XP_001662054.172 kDa type IV collagenase                                    |                                                                                                      |
| AAEL0036? serine protease easter                                       | -0.420492451109432 | 0.0227695034163136  | 0.245124275357034  | NA                      | NA                                                                         | KXJ76329.1 hypothe XP_001657087.2serine protease easter                                        |                                                                                                      |
| AAEL0060? lipase member H-A                                            | -0.419202949215271 | 0.0187304670856932  | 0.223621149257916  | NA                      | NA                                                                         | KXJ75250.1 hypothe XP_021706895.1phospholipase A1 4 isoform X2                                 |                                                                                                      |
| AAEL0260? NA                                                           | -0.419175362027799 | 0.00529141323304741 | 0.116209032387834  | NA                      | NA                                                                         | NA                                                                                             | 2KSH_AChain A, Solution Nmr Structure Of Apo Sterol Carrier Protein - 2 From Aedes Aegypti (Aescp-2) |
| AAEL0044? organic cation transporter protein                           | -0.418635227724813 | 0.0476756892296402  | 0.348460438674463  | NA                      | NA                                                                         | XP_019538575.1 PRE XP_021705408.1organic cation transporter protein isoform X1                 |                                                                                                      |
| AAEL0051? protein kinase C-binding protein NELL2                       | -0.418409144834595 | 0.0421960133482198  | 0.323939778330243  | NA                      | NA                                                                         | XP_019527617.1 PRE XP_021709168.1protein NEL isoform X2                                        |                                                                                                      |
| AAEL0083? leucine-rich repeat-containing protein 23                    | -0.418264936012299 | 0.00269263462846975 | 0.0796708162417318 | NA                      | NA                                                                         | KXG2405.1 hypothe XP_001653208.1leucine-rich repeat-containing protein 23                      |                                                                                                      |
| AAEL0058? succinate dehydrogenase assembly factor 2, mitochondrial     | -0.418134813093601 | 0.128774971713843   | 0.535335481333802  | NA                      | NA                                                                         | XP_019526916.1 PRE XP_001651508.2succinate dehydrogenase assembly factor 2, mitochondrial-like |                                                                                                      |
| AAEL0247? NA                                                           | -0.417965538256085 | 0.0988659549992854  | 0.47681575064688   | NA                      | NA                                                                         | XP_021694081.1uncharacterized protein LOC5571232 isoform X2                                    |                                                                                                      |
| AAEL0183? NA                                                           | -0.417944769941358 | 0.0467757966408179  | 0.345031868617454  | NA                      | NA                                                                         | KFB49544.1AGAP008403-like protein                                                              |                                                                                                      |
| AAEL0025? cytosinosin homolog                                          | -0.416331044048791 | 0.0617322964054292  | 0.387441038933757  | NA                      | NA                                                                         | XP_019544837.1 PRE XP_021692930.1cytosinosin homolog                                           |                                                                                                      |
| AAEL0070? recQ-mediated genome instability protein 1                   | -0.415762458291465 | 0.155975415640393   | 0.573884755986765  | NA                      | aag03460                                                                   | KXJ73189.1 hypothe XP_001652517.1recQ-mediated genome instability protein 1                    |                                                                                                      |
| AAEL0230? NA                                                           | -0.41569857892367  | 0.065207933479371   | 0.39730198438886   | NA                      | NA                                                                         | NA                                                                                             |                                                                                                      |
| AAEL0100? putative uncharacterized protein DDB_G0277255                | -0.415655487254168 | 0.0290623317186461  | 0.275227088745645  | NA                      | NA                                                                         | NA                                                                                             | XP_019558193.1 probable serine/threonine-protein kinase DDB_G0272282                                 |
| AAEL0262? NA                                                           | -0.415526330319885 | 0.241512467797007   | 0.67673499705372   | NA                      | aag01100 ; aag NA                                                          | XP_021702924.1adenylate cyclase type 3                                                         |                                                                                                      |
| AAEL0202? NA                                                           | -0.415406260669213 | 0.128346204458512   | 0.535049122410476  | NA                      | NA                                                                         | XP_001660840.2dr1-associated corepressor homolog                                               |                                                                                                      |
| AAEL0249? NA                                                           | -0.415383003231182 | 0.343258601324926   | 0.763685015811799  | NA                      | NA                                                                         | XP_021706245.1f-box/LRR-repeat protein 2-like                                                  |                                                                                                      |
| AAEL0120? L-lactate dehydrogenase                                      | -0.41516287244466  | 0.115912672347454   | 0.512764772622422  | 00640 ; 00270 ; 00620 ; | aag01100 ; aag XP_017030345.1 PRE XP_021696086.1fringe glycosyltransferase | XP_001662150.1L-lactate dehydrogenase                                                          |                                                                                                      |
| AAEL0022? fringe glycosyltransferase                                   | -0.415091190334067 | 0.167546880300487   | 0.587554508928878  | NA                      | aag04330 ; aag XP_017030345.1 PRE XP_021696086.1fringe glycosyltransferase | XP_019564523.1 pro-resilin-like                                                                |                                                                                                      |
| AAEL0171? NA                                                           | -0.414840261490759 | 0.317712741217444   | 0.745684464362801  | NA                      | NA                                                                         | XP_019564523.1 pro-resilin-like                                                                |                                                                                                      |
| AAEL0093? bone morphogenetic protein receptor type-1B                  | -0.414737385706092 | 0.0748023641147145  | 0.419458473238027  | NA                      | aag04013 ; aag NA                                                          | XP_001653798.2bone morphogenetic protein receptor type-1B                                      |                                                                                                      |
| AAEL0025? protein obstructor-E                                         | -0.414428061614902 | 0.176219370131381   | 0.601026925110811  | NA                      | NA                                                                         | CRL07705.1 CLUMA_XP_001655685.1protein obstructor-E                                            |                                                                                                      |
| AAEL0111? UPF0505 protein CG8202                                       | -0.413880474462453 | 0.064410668412112   | 0.395929840165835  | NA                      | NA                                                                         | KFB43738.1 AGAP00_XP_001655113.1UPF0505 protein CG8202                                         |                                                                                                      |
| AAEL0126? uncharacterized LOC5576615                                   | -0.413120189749406 | 0.0421894939544052  | 0.323939778330243  | NA                      | NA                                                                         | XP_001662769.2uncharacterized protein LOC5576615                                               |                                                                                                      |
| AAEL0025? serine/threonine-protein kinase greatwall                    | -0.412215516254033 | 0.199467383824287   | 0.633375309392567  | NA                      | NA                                                                         | XP_019549636.1 PRE XP_021713415.1serine/threonine-protein kinase greatwall isoform X1          |                                                                                                      |
| AAEL0004? epoxide hydrolase 4                                          | -0.411868217436816 | 0.00341248362711597 | 0.0899761442312928 | NA                      | NA                                                                         | KXJ70524.1 hypothe XP_001656425.2epoxide hydrolase 4                                           |                                                                                                      |
| AAEL0233? NA                                                           | -0.411787890943948 | 0.0682970778648811  | 0.401556773593974  | NA                      | aag04214                                                                   | XP_021696579.1 ecdysone-induced protein 74EF                                                   |                                                                                                      |
| AAEL0275? NA                                                           | -0.411696041200981 | 0.0627706104790583  | 0.391603496697149  | NA                      | NA                                                                         | XP_021712145.1uncharacterized protein LOC110680661                                             |                                                                                                      |
| AAEL0040? zinc finger protein 2                                        | -0.411493700008345 | 0.0803646498450366  | 0.433079891352508  | NA                      | NA                                                                         | KXJ77489.1 hypothe XP_021703820.1zinc finger protein 2                                         |                                                                                                      |
| AAEL0120? uncharacterized LOC5575710                                   | -0.410807830796463 | 0.0157203967400217  | 0.202259474938964  | NA                      | NA                                                                         | KXJ72264.1 hypothe XP_001662159.1uncharacterized protein LOC5575710 isoform X2                 |                                                                                                      |
| AAEL0198? NA                                                           | -0.410792070595144 | 0.00240713470735542 | 0.0760003211995279 | NA                      | NA                                                                         | XP_021699760.1uncharacterized protein LOC5567708 isoform X1                                    |                                                                                                      |
| AAEL0113? uncharacterized LOC5574705                                   | -0.410490782317153 | 0.0435488828312713  | 0.329553305767565  | NA                      | NA                                                                         | KXJ75235.1 hypothe XP_021697228.1uncharacterized protein LOC5574705                            |                                                                                                      |
| AAEL0127? cytochrome P450 4C1                                          | -0.410107349798184 | 0.0250538370049304  | 0.258627500477641  | NA                      | NA                                                                         | XP_019543095.1 PRE XP_001662864.3cytochrome P450 4C1                                           |                                                                                                      |
| AAEL0053? tetra-tricopeptide repeat protein 7B                         | -0.409983152577008 | 0.064580856195341   | 0.396444632355255  | NA                      | NA                                                                         | KXJ75584.1 hypothe XP_021705407.1tetra-tricopeptide repeat protein 7B                          |                                                                                                      |
| AAEL0212? NA                                                           | -0.409853197970641 | 0.308212845504235   | 0.741056393558619  | NA                      | NA                                                                         | XP_021706587.1uncharacterized protein LOC110678272                                             |                                                                                                      |
| AAEL0089? uncharacterized LOC5571217                                   | -0.409329226827526 | 0.212518389669315   | 0.645843785766909  | NA                      | NA                                                                         | KXJ72631.1 hypothe XP_001659600.2uncharacterized protein LOC5571217                            |                                                                                                      |
| AAEL0280? NA                                                           | -0.409303069706289 | 0.0550115817368965  | 0.368425454980292  | NA                      | NA                                                                         | NA                                                                                             |                                                                                                      |
| AAEL0101? uncharacterized LOC5572963                                   | -0.409253581580645 | 0.0210911745774407  | 0.23689494039567   | NA                      | NA                                                                         | XP_001654292.2uncharacterized protein LOC5572963                                               |                                                                                                      |
| AAEL0049? zinc finger and SCAN domain-containing protein 2             | -0.409081858997516 | 0.333120150941039   | 0.755603950945478  | NA                      | NA                                                                         | KXJ80831.1 hypothe XP_001650078.2zinc finger and SCAN domain-containing protein 2              |                                                                                                      |
| AAEL0034? uncharacterized protein Czor42 homolog                       | -0.409078449302612 | 0.176086668357242   | 0.600797004902981  | NA                      | NA                                                                         | KXJ71384.1 hypothe XP_001663805.2uncharacterized protein Czor42 homolog                        |                                                                                                      |
| AAEL0205? NA                                                           | -0.409002712936515 | 0.0142159892472986  | 0.19121517032758   | 62                      | NA                                                                         | XP_021693423.1elongation of very long chain fatty acids protein AAEL008004 isoform X1          |                                                                                                      |
| AAEL0249? NA                                                           | -0.407841655118503 | 0.22407831560126    | 0.656259917301973  | NA                      | NA                                                                         | XP_021697594.1DNA repair protein SWI5 homolog                                                  |                                                                                                      |
| AAEL0194? NA                                                           | -0.406982499807262 | 0.00141881366380464 | 0.0539509064228526 | NA                      | NA                                                                         | XP_021709682.1uncharacterized protein LOC5575021 isoform X2                                    |                                                                                                      |
| AAEL0007? very-long-chain 3-oxoacyl-CoA reductase                      | -0.40683947606616  | 0.035671366808702   | 0.299394338432267  | NA                      | NA                                                                         | XP_001846139.1 stei XP_001650278.2very-long-chain 3-oxoacyl-CoA reductase                      |                                                                                                      |
| AAEL0250? NA                                                           | -0.40629571393879  | 0.0682996601182201  | 0.401556773593974  | NA                      | NA                                                                         | XP_021704096.1uncharacterized protein LOC5564068                                               |                                                                                                      |
| AAEL0027? tropomyosin-1                                                | -0.406141802890388 | 0.00338553057713629 | 0.0897536781871071 | NA                      | NA                                                                         | KFB42387.1 AGAP00_XP_019532838.1 tropomyosin-1                                                 |                                                                                                      |
| AAEL0025? uncharacterized LOC558                                       |                    |                     |                    |                         |                                                                            |                                                                                                |                                                                                                      |

|                                                                                |                     |                     |                    |     |                |                                                                                        |                                                                              |                                    |
|--------------------------------------------------------------------------------|---------------------|---------------------|--------------------|-----|----------------|----------------------------------------------------------------------------------------|------------------------------------------------------------------------------|------------------------------------|
| AAEL0135? zinc finger protein 37 homolog                                       | -0.399660671978415  | 0.108794814487655   | 0.495854325366716  | NA  | NA             | NA                                                                                     | XP_001663743.2zinc finger protein 37 homolog                                 |                                    |
| AAEL0010? methyl-CpG-binding domain protein 3                                  | -0.399514626079239  | 0.161142611596049   | 0.5783128882372    | NA  | NA             | XP_001848947.1 me                                                                      | XP_021710255.1methyl-CpG-binding domain protein 3 isoform X4                 |                                    |
| AAEL0059? disintegrin and metalloproteinase domain-containing protein 12       | -0.399430750429526  | 0.170291564019305   | 0.590883473644663  | NA  | NA             | KXJ75381.1 hypothei                                                                    | XP_021693626.1disintegrin and metalloproteinase domain-containing protein 12 |                                    |
| AAEL0091? NA                                                                   | -0.399415659518132  | 0.00209377050495274 | 0.0718913290543847 | NA  | NA             | XP_019553430.1 PRE                                                                     | XP_021701247.1solute carrier family 41 member 1 isoform X2                   |                                    |
| AAEL0140? V-type proton ATPase 116 kDa subunit a                               | -0.399314980552928  | 0.0040436360127677  | 0.0989615388018307 | NA  | aag01100 ; aag | NA                                                                                     | XP_021706364.1V-type proton ATPase 116 kDa subunit a isoform X1              |                                    |
| AAEL0037? autophagy-related protein 2 homolog A                                | -0.398871843879363  | 0.00192001095522328 | 0.0684803907362971 | NA  | aag04140 ; aag | ETN57873.1 autoph                                                                      | XP_021712972.1autophagy-related protein 2 homolog A                          |                                    |
| AAEL0268? NA                                                                   | -0.39869260105774   | 0.418764319696941   | 0.813348977896628  | NA  | NA             | NA                                                                                     | XP_021705876.1polyadenylate-binding protein 1-8-like                         |                                    |
| AAEL0248? NA                                                                   | -0.398388398003594  | 0.185970424984574   | 0.613809128661423  | NA  | NA             | NA                                                                                     | XP_021712895.1uncharacterized protein LOC110681442                           |                                    |
| AAEL0076? general odorant-binding protein 56d                                  | -0.398380793529794  | 0.00576436357043181 | 0.121659801777783  | NA  | NA             | AGI04311.1 obp10 [                                                                     | XP_001658489.1general odorant-binding protein 56d                            |                                    |
| AAEL0144? gamma-1-syntrophin                                                   | -0.398341120365907  | 0.0607314428194728  | 0.384941803020695  | NA  | NA             | NA                                                                                     | XP_019529557.1 gamma-1-syntrophin-like isoform X2                            |                                    |
| AAEL0206? NA                                                                   | -0.397873753544142  | 0.00261514328607266 | 0.0792437883464128 | NA  | NA             | NA                                                                                     | XP_021695737.1transmembrane protein 35A                                      |                                    |
| AAEL0008? spermatogenesis-associated protein 5-like protein 1                  | -0.397061712442712  | 0.146559085141135   | 0.561212769576399  | NA  | NA             | KXJ68868.1 hypothei                                                                    | XP_001651297.1spermatogenesis-associated protein 5-like protein 1            |                                    |
| AAEL0148? regulator of hypoxia-inducible factor 1                              | -0.39613863670439   | 0.0791201314965605  | 0.430297547299852  | NA  | NA             | NA                                                                                     | XP_021697472.1regulator of hypoxia-inducible factor 1                        |                                    |
| AAEL0094? uncharacterized LOC5571975                                           | -0.395633328178196  | 0.18665884387985    | 0.614196367514984  | NA  | NA             | NA                                                                                     | XP_019547042.1 SET and MYND domain-containing protein 4                      |                                    |
| AAEL0104? protein lines                                                        | -0.395610690512843  | 0.23196595337857    | 0.666006459474246  | NA  | NA             | NA                                                                                     | XP_021705674.1protein lines                                                  |                                    |
| AAEL0018? alpha-(1,3)-fucosyltransferase 10                                    | -0.395588629380454  | 0.146132673111179   | 0.560092931004593  | NA  | NA             | XP_001870924.1 fuc                                                                     | XP_001654141.2alpha-(1,3)-fucosyltransferase 10 isoform X1                   |                                    |
| AAEL0059? actin-1-like                                                         | -0.395557811009659  | 0.00857609584326027 | 0.149464548238032  | NA  | aag04145 ; aag | CRK90035.1 CLUMA                                                                       | XP_019541792.1 actin-1-like                                                  |                                    |
| AAEL0259? NA                                                                   | -0.395333658938533  | 0.0022112391685504  | 0.0737239957572492 | NA  | NA             | NA                                                                                     | XP_021698741.1uncharacterized protein LOC5564765 isoform X3                  |                                    |
| AAEL0124? DE-cadherin                                                          | -0.394891203836921  | 0.0524386654372993  | 0.362633125106993  | NA  | NA             | XP_001861552.1 DE-                                                                     | XP_019528694.1 DE-cadherin-like                                              |                                    |
| AAEL0148? neurogenic locus notch homolog protein 2                             | -0.394717269441358  | 0.0980662212383023  | 0.473943787004209  | NA  | NA             | NA                                                                                     | XP_001649758.1neurogenic locus notch homolog protein 2                       |                                    |
| AAEL0031? uncharacterized LOC5577063                                           | -0.393765367987196  | 0.091940543268344   | 0.46005268034546   | NA  | NA             | XP_019933048.1 PRE                                                                     | ABF18169.1putative salivary mucin 4                                          |                                    |
| AAEL0004? glycerol-3-phosphate acyltransferase 3                               | -0.393731705156424  | 0.00607853441710595 | 0.127704734489061  | NA  | aag01100 ; aag | XP_019540734.1 PRE                                                                     | XP_021708939.1glycerol-3-phosphate acyltransferase 3 isoform X2              |                                    |
| AAEL0114? perlucin-like protein                                                | -0.393562719751063  | 0.0159000673359643  | 0.203211693924366  | NA  | NA             | KXJ74383.1 hypothei                                                                    | XP_001661648.2perlucin-like protein                                          |                                    |
| AAEL0275? NA                                                                   | -0.393291407828142  | 0.02226356914032    | 0.242316778828459  | NA  | NA             | NA                                                                                     | XP_021701404.1cGMP-dependent protein kinase 1                                |                                    |
| AAEL0100? NA                                                                   | -0.392679192164227  | 0.11026820132295    | 0.50033924485887   | NA  | NA             | NA                                                                                     | XP_001660568.1serine/threonine-protein kinase tricornet                      |                                    |
| AAEL0198? NA                                                                   | -0.392285387093524  | 0.0998704447843921  | 0.47964918210124   | NA  | NA             | NA                                                                                     | XP_021707813.1uncharacterized protein LOC5565745                             |                                    |
| AAEL0066? DNA-directed RNA polymerase II 16 kDa polypeptide                    | -0.392145111461316  | 0.0221321375087107  | 0.242070925206103  | NA  | aag03020       | XP_001849109.1 DN                                                                      | XP_001652151.1DNA-directed RNA polymerase II 16 kDa polypeptide              |                                    |
| AAEL0181? NA                                                                   | -0.392017318834397  | 0.330224004208971   | 0.753838076589172  | NA  | NA             | NA                                                                                     | XP_021700793.1homeobox protein aristale                                      |                                    |
| AAEL0075? uncharacterized LOC5579959                                           | -0.391791626666545  | 0.0127341339260136  | 0.182308324322341  | NA  | NA             | KXJ70544.1 hypothei                                                                    | XP_021694056.1uncharacterized protein LOC5579959                             |                                    |
| AAEL0235? NA                                                                   | -0.391726512956728  | 0.250898748731833   | 0.683858606596939  | NA  | NA             | NA                                                                                     | XP_021697329.1transmembrane protease serine 11G-like                         |                                    |
| AAEL0004? glypican-4                                                           | -0.391683745114947  | 0.118462444952893   | 0.51638627117789   | NA  | aag04310       | KXJ80119.1 hypothei                                                                    | XP_019558269.1 glypican-6                                                    |                                    |
| AAEL0045? probable serine hydrolase                                            | -0.39157864146562   | 0.0938274477570671  | 0.464823706598816  | NA  | NA             | XP_0718444.1 hypothei                                                                  | XP_001649281.2probable serine hydrolase                                      |                                    |
| AAEL0087? laminin subunit alpha                                                | -0.391424913184522  | 0.00381197830844254 | 0.0958410502576181 | NA  | aag04512       | KXJ73623.1 hypothei                                                                    | XP_001659481.2laminin subunit alpha                                          |                                    |
| AAEL0036? histone-lysine N-methyltransferase SMYD3                             | -0.391422374053543  | 0.062186711916872   | 0.389280355822487  | NA  | aag01100 ; aag | XP_001867383.1 con                                                                     | XP_001657162.2histone-lysine N-methyltransferase SMYD3                       |                                    |
| AAEL0130? nitrilase and fragile histidine triad fusion protein NitFhit         | -0.390984927386297  | 0.153509313935797   | 0.568905641094322  | 230 | NA             | NA                                                                                     | XP_001663254.2nitrilase and fragile histidine triad fusion protein NitFhit   |                                    |
| AAEL0043? follicle-stimulating hormone receptor                                | -0.389104965361112  | 0.285050592631657   | 0.717656786154995  | NA  | aag04080       | XP_019527003.1 PRE                                                                     | XP_021692996.1follicle-stimulating hormone receptor                          |                                    |
| AAEL0081? putative fatty acyl-CoA reductase CG5065                             | -0.388573697335492  | 0.128110952592163   | 0.53463808877691   | 73  | aag04146       | KFB46838.1 AGAP00                                                                      | XP_001658954.1putative fatty acyl-CoA reductase CG5065                       |                                    |
| AAEL0258? NA                                                                   | -0.388251785210972  | 0.151255862968562   | 0.566025396924239  | NA  | NA             | NA                                                                                     | NA                                                                           |                                    |
| AAEL0107? low-density lipoprotein receptor-related protein 4                   | -0.388048173668193  | 0.0136523753608399  | 0.187831676988403  | NA  | NA             | XP_019559720.1 PRE                                                                     | XP_001661035.2low-density lipoprotein receptor-related protein 4 isoform X1  |                                    |
| AAEL0194? NA                                                                   | -0.388013863646302  | 0.0319758409841047  | 0.284442054201394  | NA  | NA             | NA                                                                                     | XP_021702832.1uncharacterized protein LOC5577896 isoform X2                  |                                    |
| AAEL0267? NA                                                                   | -0.387535555159981  | 0.371026228777746   | 0.781817769662763  | NA  | NA             | NA                                                                                     | XP_019559684.1 caspase-1-like                                                |                                    |
| AAEL0122? NA                                                                   | -0.386456520813527  | 0.00567887604879571 | 0.120826935771257  | NA  | aag04310 ; aag | KXJ80090.1 hypothei                                                                    | XP_021694469.1mcy protein                                                    |                                    |
| AAEL0216? NA                                                                   | -0.386056398162517  | 0.0531735430806033  | 0.364607260378325  | NA  | NA             | NA                                                                                     | XP_021703241.1fasciclin-1 isoform X4                                         |                                    |
| AAEL0070? beta-1,3-glucan-binding protein                                      | -0.38603418529712   | 0.00509723024288796 | 0.114123388552445  | NA  | NA             | KXJ75885.1 hypothei                                                                    | XP_001652521.1beta-1,3-glucan-binding protein                                |                                    |
| AAEL0273? NA                                                                   | -0.385979812943866  | 0.271076620123789   | 0.706442100928661  | NA  | NA             | XP_021713239.1ATP-binding cassette sub-family G member 8 isoform X1                    | XP_019932919.1 lateral signaling target protein 2 homolog                    |                                    |
| AAEL0218? NA                                                                   | -0.385543457129691  | 0.0137003339243226  | 0.187831676988403  | NA  | NA             | NA                                                                                     | XP_019544057.1 PRE                                                           | XP_021709686.1ankyrin-3 isoform X2 |
| AAEL0115? ankyrin-3                                                            | -0.38431984439581   | 0.027722408821411   | 0.271096286901832  | NA  | aag04624       | XP_019544057.1 PRE                                                                     | XP_021709686.1ankyrin-3 isoform X2                                           |                                    |
| AAEL0079? retinoid-inducible serine carboxypeptidase                           | -0.384242246650947  | 0.00713007213924433 | 0.137861850831157  | NA  | NA             | KFB47556.1 AGAP01                                                                      | XP_001658722.1retinoid-inducible serine carboxypeptidase                     |                                    |
| AAEL0259? NA                                                                   | -0.384020391734045  | 0.00665048605618502 | 0.133911975249485  | NA  | NA             | XP_021696289.1aryl hydrocarbon receptor nuclear translocator-like protein 1 isoform X2 | XP_019931581.1 PRE                                                           | XP_021703436.1P protein isoform X3 |
| AAEL0116? WAP, Kazal, immunoglobulin, Kunitz and NTR domain-containing protein | -0.383803380561934  | 0.00519413504273014 | 0.11517122080007   | NA  | NA             | XP_001661812.1WAP, Kazal, immunoglobulin, Kunitz and NTR domain-containing protein 2   | XP_019931581.1 PRE                                                           | XP_021703436.1P protein isoform X3 |
| AAEL0079? P protein                                                            | -0.383703396042731  | 0.0287751807099643  | 0.274601260200884  | NA  | NA             | XP_001663697.1pupal cuticle protein Edg-84A                                            | XP_001657679.2luciferin 4-monoxygenase                                       |                                    |
| AAEL0117? uncharacterized LOC5576092                                           | -0.3836110125895216 | 0.196887574821074   | 0.630345746481079  | NA  | NA             | XP_001850268.1 yell                                                                    | XP_021693794.1major royal jelly protein 1                                    |                                    |
| AAEL0048? major royal jelly protein 1                                          | -0.383480753452953  | 0.0650689544955012  | 0.39730198438886   | NA  | NA             | XP_001850268.1 yell                                                                    | XP_021693794.1major royal jelly protein 1                                    |                                    |
| AAEL0027? arrestin domain-containing protein 2                                 | -0.382236438815454  | 0.238002529645662   | 0.672634913329047  | NA  | NA             | KXJ80134.1 hypothei                                                                    | XP_001662207.2arrestin domain-containing protein 2                           |                                    |
| AAEL0036? sodium-dependent nutrient amino acid transporter 1                   | -0.382041797974646  | 0.0145128640184697  | 0.193517439045371  | NA  | NA             | XP_019558048.2 PRE                                                                     | XP_001657071.2sodium-dependent nutrient amino acid transporter 1             |                                    |
| AAEL0243? NA                                                                   | -0.382009748581039  | 0.201903155953586   | 0.634701781910801  | NA  | NA             | XP_021709459.1ALK tyrosine kinase receptor                                             | XP_001663697.1pupal cuticle protein Edg-84A                                  |                                    |
| AAEL0135? pupal cuticle protein Edg-84A                                        | -0.381996990718318  | 0.171064351690184   | 0.592447935360585  | NA  | NA             | NA                                                                                     | XP_001663697.1pupal cuticle protein Edg-84A                                  |                                    |
| AAEL0001? luciferin 4-monoxygenase                                             | -0.38167935155299   | 0.162675709930717   | 0.581228146321853  | NA  | NA             | KXJ68569.1 hypothei                                                                    | XP_001657679.2luciferin 4-monoxygenase                                       |                                    |
| AAEL0088? kynurenine 3-monoxygenase                                            | -0.381397497729541  | 0.0232862675468667  | 0.247436758819963  | 380 | aag01100 ; aag | XP_019531555.1 PRE                                                                     | XP_001653516.2kynurenine 3-monoxygenase                                      |                                    |
| AAEL0125? PI-CLX X domain-containing protein 3                                 | -0.380754391357859  | 0.0833473575355471  | 0.438013925780757  | NA  | NA             | ETN61918.1 glycosyl                                                                    | XP_021700218.1PIC X domain-containing protein 3                              |                                    |
| AAEL0144? glycine dehydrogenase (decarboxylating), mitochondrial               | -0.380618448382248  | 0.                  |                    |     |                |                                                                                        |                                                                              |                                    |

|                                                                                    |                     |                     |                    |     |                     |                                                                         |                                                                                    |
|------------------------------------------------------------------------------------|---------------------|---------------------|--------------------|-----|---------------------|-------------------------------------------------------------------------|------------------------------------------------------------------------------------|
| AAEL0042c DNA helicase MCM8                                                        | -0.374794993749012  | 0.146743529308952   | 0.561469420665687  | NA  | NA                  | KXJ83158.1 hypothei                                                     | XP_021705904.1DNA helicase MCM8                                                    |
| AAEL0092c neurotactin                                                              | -0.374488999369319  | 0.094949023826281   | 0.466731259214443  | NA  | NA                  | NA                                                                      | XP_019525918.1 neurotactin-like                                                    |
| AAEL0003c cleavage and polyadenylation specificity factor subunit CG7185           | -0.373899635136107  | 0.0769656381644058  | 0.42460299903409   | NA  | NA                  | KFB52034.1 AGAPO0                                                       | XP_001655573.1cleavage and polyadenylation specificity factor subunit CG7185       |
| AAEL0088c CDK-activating kinase assembly factor MAT1                               | -0.373496468462324  | 0.140324620740792   | 0.550646976570049  | NA  | aag03420 ; aag      | KFB49087.1 AGAPO0                                                       | XP_001653470.1CDK-activating kinase assembly factor MAT1                           |
| AAEL0035c gamma-tubulin complex component 4 homolog                                | -0.373113715005685  | 0.06810096350044172 | 0.401232883533236  | NA  | NA                  | KXJ80500.1 hypothei                                                     | XP_001656936.1gamma-tubulin complex component 4 homolog                            |
| AAEL0123c NA                                                                       | -0.372955425905473  | 0.126224345304038   | 0.530481545423179  | NA  | NA                  | XP_019534814.1 PRE                                                      | XP_001662494.2lipase 1                                                             |
| AAEL0140c copper homeostasis protein cutC homolog                                  | -0.371801784011365  | 0.223677204645051   | 0.655920215788323  | NA  | NA                  | NA                                                                      | XP_001664302.1copper homeostasis protein cutC homolog                              |
| AAEL0195c NA                                                                       | -0.371150096884724  | 0.165465193830403   | 0.584439853413553  | NA  | NA                  | NA                                                                      | XP_021711334.1zinc finger protein 91 isoform X3                                    |
| AAEL0135c protein king tubby 2                                                     | -0.370745300918413  | 0.310706567696142   | 0.742918550320373  | NA  | NA                  | NA                                                                      | XP_021707309.1protein king tubby 2                                                 |
| AAEL0143c1 uncharacterized LOC5564099                                              | -0.370691464741346  | 0.00399567663155817 | 0.09845806803174   | NA  | NA                  | NA                                                                      | XP_001648425.1uncharacterized protein LOC5564099 isoform X1                        |
| AAEL0141c E3 ubiquitin-protein ligase TRIM37                                       | -0.370278645154358  | 0.19014621295888    | 0.618521820583848  | NA  | NA                  | NA                                                                      | XP_001648168.1E3 ubiquitin-protein ligase TRIM37                                   |
| AAEL0198c NA                                                                       | -0.369877210196621  | 0.0896660410606025  | 0.45743198048147   | NA  | NA                  | NA                                                                      | XP_021709246.1calcineurin-binding protein cabin-1 isoform X5                       |
| AAEL0060c NADPH-dependent diflavin oxidoreductase 1-like                           | -0.369820100908301  | 0.32348003490918    | 0.747623913019176  | NA  | NA                  | XP_019544968.1 PRE                                                      | XP_021711981.1NADPH-dependent diflavin oxidoreductase 1-like                       |
| AAEL0151c uncharacterized LOC5566324                                               | -0.369377158722775  | 0.17943295593711    | 0.604797111430702  | NA  | NA                  | NA                                                                      | XP_001650709.1uncharacterized protein LOC5566324                                   |
| AAEL0033c uncharacterized LOC5578020                                               | -0.369173468676245  | 0.268417449303967   | 0.704184172798867  | NA  | NA                  | KXJ82984.1 hypothei                                                     | XP_001656760.1uncharacterized protein LOC5578020                                   |
| AAEL0196c NA                                                                       | -0.3691214306453401 | 0.0138340274138546  | 0.188314674944216  | NA  | NA                  | NA                                                                      | XP_021698333.1protein furry isoform X4                                             |
| AAEL0136c WD repeat-containing protein 89                                          | -0.36873228810638   | 0.129399093293708   | 0.53564123098907   | NA  | NA                  | NA                                                                      | XP_001660585.2WD repeat-containing protein 89                                      |
| AAEL0172c phosphatidylinositol 3,4,5-trisphosphate 3-phosphatase and dual-specific | -0.367924564360109  | 0.0144654859840155  | 0.193195068250958  | NA  | NA                  | NA                                                                      | XP_019542897.1 box A-binding factor-like isoform X1                                |
| AAEL0093c protein Skeletor, isoforms B/C                                           | -0.367858895740592  | 0.031604325676385   | 0.28423411888152   | NA  | NA                  | NA                                                                      | XP_021712422.1protein Skeletor, isoforms D/E isoform X2                            |
| AAEL0029c nicotinamidase                                                           | -0.367508491549564  | 0.159680173330679   | 0.577560236664366  | NA  | NA                  | XP_321695.5 AGAPO                                                       | XP_021711481.1uncharacterized protein LOC5580264 isoform X2                        |
| AAEL0227c NA                                                                       | -0.367500373947426  | 0.0415246221659315  | 0.321207384249982  | NA  | NA                  | NA                                                                      | ---NA---                                                                           |
| AAEL0229c NA                                                                       | -0.367440716177318  | 0.0101630185954466  | 0.162643647157043  | NA  | NA                  | NA                                                                      | XP_021697958.1basic proline-rich protein                                           |
| AAEL0109c alpha-tocopherol transfer protein-like                                   | -0.366369761599935  | 0.0335759460262508  | 0.288214417288769  | NA  | ETN60609.1 phosph   | XP_001661206.1alpha-tocopherol transfer protein-like                    |                                                                                    |
| AAEL0217c NA                                                                       | -0.366254781629416  | 0.176622906085959   | 0.601511466248332  | NA  | NA                  | NA                                                                      | XP_021694165.1leucine-rich repeat protein soc-2 homolog                            |
| AAEL0270c NA                                                                       | -0.36624571516257   | 0.133992984344148   | 0.542662316284181  | NA  | NA                  | NA                                                                      | XP_021706483.1phospholipase D1                                                     |
| AAEL0156c NA                                                                       | -0.366198244335948  | 0.1450565373039     | 0.558498015175938  | 250 | aag01100 ; aag      | NA                                                                      | XP_001647586.2asparagine synthetase [glutamine-hydrolyzing] 1                      |
| AAEL0206c NA                                                                       | -0.366125581604949  | 0.343988553563223   | 0.764585185963472  | NA  | NA                  | NA                                                                      | XP_021703444.1zinc finger protein 583-like                                         |
| AAEL0036c NA                                                                       | -0.366045295795247  | 0.322617950614777   | 0.746650319748046  | NA  | NA                  | XP_001861495.1 sele                                                     | XP_021701458.1selenoprotein H                                                      |
| AAEL0054c A disintegrin and metalloproteinase with thrombospondin motifs 12        | -0.36603545909369   | 0.339197991517476   | 0.761115461750945  | NA  | NA                  | XP_019540412.1 PRE                                                      | XP_021704593.1a disintegrin and metalloproteinase with thrombospondin motifs 12    |
| AAEL0027c nuA4 complex subunit EAF3 homolog                                        | -0.366028187397501  | 0.115365610534081   | 0.511858412793931  | NA  | NA                  | KXJ68922.1 hypothei                                                     | XP_001655962.2nuA4 complex subunit EAF3 homolog                                    |
| AAEL0012c PI-PLC X domain-containing protein 1                                     | -0.365704777838755  | 0.202970652289673   | 0.635896319876174  | NA  | NA                  | KXJ79292.1 hypothei                                                     | XP_021696659.1PIC X domain-containing protein 1                                    |
| AAEL0094c retinal dehydrogenase 1                                                  | -0.36545331098855   | 0.0406623721548326  | 0.316829084308865  | NA  | NA                  | NA                                                                      | XP_001660495.2retinal dehydrogenase 1                                              |
| AAEL0223c NA                                                                       | -0.365093950051597  | 0.234952024478247   | 0.668737559309875  | NA  | NA                  | NA                                                                      | XP_021696706.1tyrosine-protein kinase PR2                                          |
| AAEL0234c NA                                                                       | -0.364933625582179  | 0.0168567471834701  | 0.210469182608266  | NA  | NA                  | NA                                                                      | XP_021699291.1fibroin heavy chain                                                  |
| AAEL0100c inverted formin-2                                                        | -0.364827885343962  | 0.015260685829531   | 0.198907702459398  | NA  | NA                  | NA                                                                      | XP_001660600.2serine/arginine repetitive matrix protein 2 isoform X1               |
| AAEL0015c uncharacterized LOC5571482                                               | -0.364792140518247  | 0.437627521518138   | 0.820960220424486  | NA  | XP_001844764.1 con  | XP_001659740.2uncharacterized protein LOC5571482                        |                                                                                    |
| AAEL0086c microtubule-associated protein RP/EB family member 1                     | -0.3646848931810446 | 0.287694409280092   | 0.719789675158259  | NA  | KXJ81658.1 hypothei | XP_001653411.2microtubule-associated protein RP/EB family member 1      |                                                                                    |
| AAEL0226c NA                                                                       | -0.364668092661962  | 0.1115514733030048  | 0.502879021478986  | NA  | NA                  | NA                                                                      | XP_021700978.1O-acyltransferase like protein                                       |
| AAEL0082c uncharacterized LOC5570366                                               | -0.364345066308921  | 0.00632709863103367 | 0.129902019865584  | NA  | NA                  | NA                                                                      | XP_001659087.2uncharacterized protein LOC5570366                                   |
| AAEL0245c NA                                                                       | -0.364319274114394  | 0.0148484446088179  | 0.196597679554449  | NA  | NA                  | NA                                                                      | XP_019558764.1 RNA polymerase-associated protein LE01-like                         |
| AAEL0106c serine palmitoyltransferase 1                                            | -0.363864664705668  | 0.0357383641959821  | 0.299512228892926  | NA  | aag01100 ; aag      | KXJ71519.1 hypothei                                                     | XP_001660943.1serine palmitoyltransferase 1                                        |
| AAEL0199c NA                                                                       | -0.363848226397206  | 0.38623539635454    | 0.791224994795546  | NA  | NA                  | NA                                                                      | XP_001649853.2zinc finger protein 883                                              |
| AAEL0080c potassium/sodium hyperpolarization-activated cyclic nucleotide-gated ch  | -0.363521714950996  | 0.147377862595301   | 0.561952643558699  | NA  | NA                  | NA                                                                      | XP_021700035.1uncharacterized protein LOC5569977 isoform X2                        |
| AAEL0268c NA                                                                       | -0.363393701407489  | 0.188293405024457   | 0.615250207631631  | NA  | NA                  | NA                                                                      | XP_021712937.1dnal homolog subfamily B member 12-like                              |
| AAEL0144c probable medium-chain specific acyl-CoA dehydrogenase, mitochondrial     | -0.363367640246489  | 0.00743778316454158 | 0.141410084049817  | NA  | aag01100 ; aag      | NA                                                                      | XP_001648811.1probable medium-chain specific acyl-CoA dehydrogenase, mitochondrial |
| AAEL0120c edysteroid-regulated 16 kDa protein                                      | -0.362211310677729  | 0.00412483947830038 | 0.0998862444192635 | NA  | aag04142            | ADC29876.1 MDL2 [r                                                      | XP_001662215.1ecdysteroid-regulated 16 kDa protein                                 |
| AAEL0241c NA                                                                       | -0.361332022913848  | 0.228037817284672   | 0.66175420142127   | NA  | NA                  | NA                                                                      | NA                                                                                 |
| AAEL0000c serine protease easter                                                   | -0.361039903189178  | 0.00627911396362423 | 0.129262654794788  | NA  | KXJ72916.1 hypothei | XP_001647870.2serine protease easter                                    |                                                                                    |
| AAEL0246c NA                                                                       | -0.360621969170772  | 0.277251610703411   | 0.71264506192536   | NA  | NA                  | NA                                                                      | NA                                                                                 |
| AAEL0035c POU domain protein CF1A                                                  | -0.36046965347459   | 0.260246305593069   | 0.693219418655219  | NA  | NA                  | XP_001843890.1 pou                                                      | XP_021699519.1POU domain protein CF1A                                              |
| AAEL0271c NA                                                                       | -0.3603677705145506 | 0.090750674634924   | 0.458582874647784  | NA  | NA                  | NA                                                                      | XP_021706892.1glycoprotein endo-alpha-1,2-mannosidase                              |
| AAEL0047c general odorant-binding protein 66                                       | -0.359687656069674  | 0.0441403499653098  | 0.332214793948945  | NA  | NA                  | KXJ74685.1 hypothei                                                     | XP_001649647.2general odorant-binding protein 66                                   |
| AAEL0146c cytochrome P450 9e2                                                      | -0.359191645421287  | 0.440612588458362   | 0.822798752521693  | NA  | NA                  | NA                                                                      | XP_001649093.1cytochrome P450 9e2                                                  |
| AAEL0072c uncharacterized LOC55668940                                              | -0.35882473781782   | 0.04008574005006671 | 0.099726737243273  | NA  | NA                  | NA                                                                      | ABF18366.1farnesic acid o-methyltransferase-like protein                           |
| AAEL0084c uncharacterized LOC5570622                                               | -0.358507850644826  | 0.0705365679762906  | 0.408510018438117  | NA  | NA                  | XP_001850204.1 con                                                      | XP_001659225.2uncharacterized protein LOC5570622                                   |
| AAEL0077c nucleoside diphosphate-linked moiety X motif 8                           | -0.35818688039427   | 0.211510702759546   | 0.643837739594224  | NA  | KXJ72245.1 hypothei | XP_001658626.2nucleoside diphosphate-linked moiety X motif 8            |                                                                                    |
| AAEL0083c neurofibromin                                                            | -0.35777701748686   | 0.0755839909548996  | 0.420516274980827  | NA  | ETN62306.1 neurofit | XP_021706870.1neurofibromin isoform X2                                  |                                                                                    |
| AAEL0065c nuclear envelope phosphatase-regulatory subunit 1 homolog                | -0.35770797172021   | 0.0855762261820168  | 0.444397535737539  | NA  | ETN62964.1 hypothe  | XP_001652053.1nuclear envelope phosphatase-regulatory subunit 1 homolog |                                                                                    |
| AAEL0046c uncharacterized LOC5565214                                               | -0.357596686206074  | 0.263013684112594   | 0.696876452981309  | NA  | NA                  | NA                                                                      | XP_021706966.1uncharacterized protein LOC5565214                                   |
| AAEL0017c ATP-dependent RNA helicase dbp2                                          | -0.35719843104466   | 0.0033107094036782  | 0.0893406097730125 | NA  | NA                  | KXJ71844.1 hypothei                                                     | XP_001653950.2ATP-dependent RNA helicase dbp2                                      |
| AAEL0247c NA                                                                       | -0.3571863831363232 | 0.220421883835273   | 0.652412844728166  | NA  | NA                  | NA                                                                      | NA                                                                                 |
| AAEL0149c NA                                                                       | -0.357045609820053  | 0.14549273350393    | 0.558950568057442  | NA  | NA                  | NA                                                                      | XP_001650112.2uncharacterized protein LOC5565753                                   |
| AAEL0089c FAST kinase domain-containing protein 3, mitochondrial                   | -0.3570213706652526 | 0.04                |                    |     |                     |                                                                         |                                                                                    |

AAEL0002: uncharacterized family 31 glucosidase KIAA1161 -0.352186297298841 0.151040782047226 0.566025396924239 NA  
AAEL0080: uncharacterized LOC5569924 -0.352092266087861 0.0243939313115352 0.255291093250631 NA  
AAEL107: inositol-trisphosphate 3-kinase A 0.134507605497298 0.542662316284181 NA  
AAEL0097: transmembrane and TPR repeat-containing protein CG4341 -0.351488767951343 0.262053123987204 0.695532981520119 NA  
AAEL0001: uncharacterized LOC5567750 -0.351249351478843 0.197285022042757 0.630372589300064 NA  
AAEL106: monocyte to macrophage differentiation factor -0.350904539617019 0.0325994010770855 0.28463170766102 NA  
AAEL105: protein eiger -0.350548112458725 0.0287911725380627 0.274601260220884 NA  
AAEL0089: G protein-activated inward rectifier potassium channel 3 -0.35031516414335 0.0137781332283386 0.187831676988403 NA  
AAEL0048: adipocyte plasma membrane-associated protein -0.35020309089411 0.125900275229073 0.530481545423179 NA  
AAEL10127: uncharacterized LOC5576787 -0.350132107030724 0.0176145285996049 0.214955509175633 NA  
AAEL0017: uncharacterized LOC5572075 -0.350047848374686 0.120347133633353 0.521361270092351 NA  
AAEL0064: uncharacterized LOC5568048 -0.349853602716581 0.180417549474594 0.605728027045765 NA  
AAEL0004: uncharacterized LOC5577339 -0.349685474609494 0.222905148980636 0.655580227356264 NA  
AAEL182: NA -0.349454060309238 0.0123870467715057 0.179504888805347 NA  
AAEL143: out at first protein -0.349241837184143 0.0174016626828274 0.214364257037989 NA  
AAEL126: neither inactivation nor afterpotential protein G -0.348933692184466 0.0862353040389072 0.447315258041727 NA  
AAEL120: tyrosine-protein phosphatase 10D -0.347777320196145 0.0043928829464615 0.103594442242845 NA  
AAEL0057: tyrocidine synthase 3 -0.347666000227147 0.0127658772605593 0.182308324322341 NA  
AAEL0077: lipoma-preferred partner homolog -0.347142760467956 0.0329190904548147 0.285244952713941 NA  
AAEL194: NA -0.347113427528962 0.334675659327314 0.577087156181969 NA  
AAEL009: alkaline phosphatase 4 -0.346865023919194 0.0167223592340141 0.209527649977971 00790 / 00730  
AAEL181: NA -0.346214592694832 0.0271558381650316 0.26883665026084 NA  
AAEL0249: NA -0.346135143460517 0.191732630710866 0.621678529880687 NA  
AAEL106: zinc finger protein 502 -0.346090433811849 0.0824641600804849 0.437257081788889 NA  
AAEL0043: hexosaminidase D -0.345907415049441 0.254962229752781 0.687016819380699 00513 / 00603 / 00604  
AAEL0204: probable chitinase 10 -0.345670195708664 0.602634461357781 0.692898376274034 NA  
AAEL0204: NA -0.345622083877374 0.111593019111073 0.502879021478986 NA  
AAEL156: solute carrier family 25 member 45 -0.345557830728385 0.106225429074199 0.490844601505817 NA  
AAEL0207: NA -0.345175802586673 0.25580723668129 0.68833867617105 NA  
AAEL0045: uncharacterized LOC5565096 -0.344644973588979 0.0075793643174105 0.142337368262881 NA  
AAEL0229: NA -0.344536641409691 0.242541152803401 0.677312119697343 NA  
AAEL0081: uncharacterized LOC5570131 -0.344497162182138 0.218399214125806 0.651909019364208 NA  
AAEL0024: hydroxysteroid dehydrogenase-like protein 2 -0.344012560828659 0.0167154742878907 0.209527649977971 NA  
AAEL136: regucalcin -0.343656910391605 0.2533707073894229 0.685145258966747 NA  
AAEL0039: calpain-B -0.343478024424285 0.151060726865632 0.566025396924239 NA  
AAEL0051: cytochrome c oxidase subunit 4 isoform 1, mitochondrial -0.34345889882846 0.0292008522461461 0.275879098941516 NA  
AAEL0238: NA -0.343112908275202 0.258592979471266 0.691547675112889 NA  
AAEL0018: sodium-coupled monocarboxylate transporter 1 -0.342411781973627 0.15725869059113 0.574474189691589 NA  
AAEL117: agglutinin-like protein ARB\_02240 -0.342344183422048 0.279561682175346 0.713638889794457 NA  
AAEL108: mitochondrial ubiquitin ligase activator of nfkb 1-A -0.342206441379193 0.0939348941584184 0.464823706598816 NA  
AAEL0023: protein unc-13 homolog B -0.342109179429955 0.10675882544742 0.492032104248678 NA  
AAEL117: putative leucine-rich repeat-containing protein DDB\_G0290503 -0.341945363415864 0.0954706544518139 0.467087334124813 NA  
AAEL0053: protein ABHD18 -0.34161246348908 0.112430170409670 0.503547757511443 NA  
AAEL0230: NA -0.341539094836699 0.259024346325782 0.691547675112889 NA  
AAEL195: NA -0.341511826183097 0.204625143423745 0.637782699712521 NA  
AAEL0085: alanine--tRNA ligase, mitochondrial -0.341011369404223 0.197254851068272 0.630372589300064 970  
AAEL197: NA -0.340731230107488 0.006267808653017 0.129262654794788 NA  
AAEL0065: eukaryotic translation initiation factor 4E-binding protein Mex1l -0.340660335973117 0.00613885000483537 0.128094552708606 NA  
AAEL0222: NA -0.34047951811709 0.226097816463403 0.660073638038144 NA  
AAEL114: NA -0.340461844481753 0.227070102914986 0.66123388829864 NA  
AAEL0255: NA -0.340238177405764 0.00673722504342888 0.135067417973056 NA  
AAEL0025: twitchin -0.34020532456494 0.012954512987735 0.183396034112791 NA  
AAEL0270: NA -0.340043621187498 0.137721332520349 0.54743486041134 NA  
AAEL148: N-acetyltransferase 6 -0.339632704280521 0.225156324860706 0.658047884618818 NA  
AAEL0200: NA -0.339533569737743 0.0783882649277973 0.428723995973646 NA  
AAEL0094: peptidyl-prolyl cis-trans isomerase, rhodopsin-specific isozyme -0.339481495086677 0.056247103079542 0.373169316898302 NA  
AAEL0071: ELKS/Rab6-interacting/CAST family member 1 -0.33896694729921 0.0749115496463199 0.419814908553859 NA  
AAEL0212: NA -0.338956299611704 0.23722534848975 0.671758630247645 NA  
AAEL0047: locomotion-related protein Hikaru genki -0.338863466374156 0.0152176428986194 0.198907702459398 NA  
AAEL196: NA -0.338603996842251 0.292035676996909 0.722978826937197 NA  
AAEL0081: ATP-binding cassette sub-family G member 1 -0.338561875473127 0.069507809771724 0.404817003493294 NA  
AAEL0031: copper transport protein ATOX1 -0.338273263436408 0.112975930323505 0.503928507434265 NA  
AAEL147: nose resistant to fluoxetine protein 6 -0.337586071783242 0.103082666376396 0.485796149609891 NA  
AAEL0046: centrosomal protein of 83 kDa -0.337517301583769 0.0371045023745656 0.304789118266276 NA  
AAEL186: NA -0.337454524243747 0.4885338355044 0.84884683445739 NA  
AAEL181: NA -0.337361607533379 0.369534188262845 0.781817769662763 NA  
AAEL0086: ATP-binding cassette sub-family G member 4 -0.337272394873114 0.0221475320788849 0.24207092506203 NA  
AAEL135: uncharacterized LOC5578143 -0.337089967109296 0.0410914807431541 0.319254212557132 NA  
AAEL0037: uncharacterized LOC5578922 -0.336961637621525 0.00868803486197016 0.15055980979001 NA  
AAEL0028: heterogeneous nuclear ribonucleoprotein R -0.336884464896778 0.0106708247271162 0.166147088221529 NA  
AAEL134: ankyrin-2 -0.336810064000902 0.00731675838443856 0.139976879851359 NA  
AAEL0262: NA -0.336771939268514 0.156785254813093 0.574474189691589 NA  
AAEL0236: NA -0.336500761946922 0.242124883892891 0.676994125742042 NA  
AAEL0203: NA -0.336406645965571 0.0326355488707924 0.28463170766102 NA  
AAEL0262: NA -0.336328369661654 0.108658700531031 0.495725018486141 NA  
AAEL122: cytochrome P450 4C1 -0.336279377366545 0.0605302881858901 0.384941803020695 NA  
AAEL0011: uncharacterized LOC5568837 -0.336015255542751 0.035691761493175 0.299394338432267 NA  
AAEL0029: NA -0.335636365161135 0.0316085330959961 0.28423411888152 NA  
AAEL108: protein lethal(2)denticleless -0.335188322521944 0.278419211444558 0.713122992430066 NA  
AAEL138: uncharacterized LOC5578833 -0.334782484523333 0.1009622916035568 0.168586924805399 NA  
AAEL0042: flightin -0.33475542452734 0.0209544924622218 0.23627229311125 NA  
AAEL0001: chorion transcription factor CF2 -0.334739935406558 0.364252003845251 0.77844728212936 NA

NA KXJ75975.1 hypothei XP\_001660136.1.uncharacterized family 31 glucosidase KIAA1161  
NA KXJ76905.1 hypothei XP\_021695837.1.uncharacterized protein LOC5569924  
aag01100; aag XP\_019549290.1 PRE XP\_021701282.1.inositol-trisphosphate 3-kinase A isoform X3  
NA NA XP\_021695335.1.transmembrane and TPR repeat-containing protein CG4341  
NA AGI04310.1 obp5 [A. XP\_019536842.1 general odorant-binding protein 67-like  
NA KXJ77678.1 hypothei XP\_001660993.1.monocyte to macrophage differentiation factor  
aag04013; aag NA XP\_001654630.1.protein eiger  
NA XP\_019529555.1 PRE XP\_001653531.1.G protein-activated inward rectifier potassium channel 3 isoform X3  
NA KXJ80336.1 hypothei XP\_001649960.1.adipocyte plasma membrane-associated protein  
KXJ72565.1 hypothei XP\_001662874.2.uncharacterized protein LOC5576787  
ETN58974.1 hypothe XP\_001653843.1.uncharacterized protein LOC5572075  
NA KXJ80818.1 hypothei XP\_001651984.1.uncharacterized protein LOC5568048  
NA NA XP\_021705227.1.uncharacterized protein LOC5577339 isoform X2  
NA XP\_021705130.1.basement membrane-specific heparan sulfate proteoglycan core protein isoform X1  
NA NA XP\_021701513.1.out at first protein  
NA KXJ76593.1 hypothei XP\_021708468.1.neither inactivation nor afterpotential protein G  
NA XP\_019529910.1 PRE XP\_021705335.1.tyrosine-protein phosphatase 10D isoform X8  
NA KXJ71980.1 hypothei XP\_001651463.2.uncharacterized protein LOC5567063  
aag04391 KXJ76959.1 hypothei XP\_001652822.2.lipoma-preferred partner homolog  
NA NA XP\_021700587.1.protein disks lost  
aag01100; aag KFB49884.1 AGAP01 XP\_001657478.1.alkaline phosphatase 4  
aag04013; aag NA XP\_021703015.1.mitogen-activated protein kinase kinase kinase 7  
NA NA XP\_019528163.2.lachesin-like  
NA XP\_019550877.1 PRE XP\_021700870.1.zinc finger protein 502  
aag01100; aag KXJ71711.1 hypothei XP\_001649003.1.hexosaminidase D  
NA KXJ77819.1 hypothei XP\_001655365.1.probable chitinase 10  
NA NA XP\_021708436.1.uncharacterized protein LOC5579261 isoform X1  
NA NA XP\_001662917.2.solute carrier family 25 member 45 isoform X1  
NA NA XP\_021712647.1.uncharacterized protein LOC110681180 isoform X2  
NA NA AAY41833.1.putative secreted protein precursor  
NA NA NA  
NA KXJ71021.1 hypothei XP\_001653111.1.uncharacterized protein LOC5570131  
NA XP\_019554042.1 PRE XP\_001655211.2.hydroxysteroid dehydrogenase-like protein 2 isoform X2  
NA NA XP\_021707378.1.regucalcin isoform X2  
NA NA XP\_001648123.2.calpain-B isoform X5  
aag01100; aag XP\_001846433.1.cyt. XP\_021701509.1.cytochrome c oxidase subunit 4 isoform 1, mitochondrial  
NA NA XP\_021695638.1.zinc finger protein 883  
NA XP\_019536043.1 PRE XP\_021702456.1.sodium-coupled monocarboxylate transporter 1 isoform X1  
NA XP\_001853598.1 con XP\_021698775.1.agglutinin-like protein ARB\_02240  
NA XP\_001850539.1 con XP\_001661088.1.mitochondrial ubiquitin ligase activator of nfkb 1-A  
NA NA XP\_001661348.1.protein unc-13 homolog C isoform X4  
NA KXJ75525.1 hypothei XP\_021707239.1.putative leucine-rich repeat-containing protein DDB\_G0290503  
NA KXJ69464.1 hypothei XP\_021710584.1.protein ABHD18  
NA NA XP\_021709173.1.transient receptor potential channel pyrexia-like  
NA XP\_021701149.1.EYATS domain-containing protein 2  
970 aag00970 KXJ76855.1 hypothei XP\_001659327.1.alanine--tRNA ligase, mitochondrial  
NA NA XP\_021699588.1.trichohyalin isoform X6  
NA XP\_019533068.1 PRE XP\_021703995.1.eukaryotic translation initiation factor 4E-binding protein Mex1l isoform X1  
NA NA KXJ72608.1 hypothei XP\_019553299.1 biogenesis of lysosome-related organelles complex 1 subunit 6  
NA NA XP\_021696069.1 obscurin  
NA XP\_019556125.1 PRE XP\_001655590.2.twitchin isoform X3  
NA NA XP\_021699522.1.protein downstream neighbor of son homolog  
NA NA XP\_001649676.1.N-acetyltransferase 6 isoform X2  
NA NA XP\_021703666.1.gastrula zinc finger protein XICGF26.1 isoform X2  
NA XP\_001660049.1.peptidyl-prolyl cis-trans isomerase, rhodopsin-specific isozyme isoform X1  
NA NA XP\_001652593.3.ELKS/Rab6-interacting/CAST family member 1 isoform X3  
NA XP\_021705378.1.uncharacterized protein LOC5565035  
NA KXJ72377.1 hypothei XP\_021702536.1.locomotion-related protein Hikaru genki isoform X1  
NA NA XP\_021711338.1.zinc finger protein 184  
NA XP\_019527804.1 PRE XP\_001658974.2.ATP-binding cassette sub-family G member 4 isoform X3  
NA XP\_001865898.1 ant XP\_001656348.2.copper transport protein ATOX1  
NA NA XP\_021697467.1.nose resistant to fluoxetine protein 6  
NA XP\_019550261.1 PRE XP\_021707435.1.CAP-Gly domain-containing linker protein 1 isoform X3  
NA NA NA  
NA NA XP\_001659579.2.zinc finger protein 350  
NA KXJ78719.1 hypothei XP\_001653364.2.ATP-binding cassette sub-family G member 4  
NA CRK88250.1.CLUMA\_CG002031, isoform A  
NA KXJ75765.1 hypothei XP\_001657208.2.uncharacterized protein LOC5578922  
NA NA XP\_021693280.1.heterogeneous nuclear ribonucleoprotein R isoform X10  
NA XP\_021701964.1.ankyrin-3 isoform X2  
NA NA XP\_021705603.1.synaptic vesicular amine transporter isoform X2  
NA NA XP\_021695592.1.zinc finger protein 436 isoform X2  
NA XP\_021704030.1.uncharacterized protein LOC110677244  
NA NA NA  
NA KFB49529.1 AGAP00 XP\_001655966.1.cytochrome P450 4C1  
NA NA XP\_001658203.1.uncharacterized protein LOC5568837 isoform X2  
NA KXJ77164.1 hypothei XP\_001656231.1 endochitinase  
NA KXJ82473.1 hypothei XP\_001661121.1.protein lethal(2)denticleless  
aag01100; aag NA ABF18416.1.putative mitochondrial NADH+ubiquinone oxidoreductase  
NA KFB40354.1 AGAP00 XP\_001648786.1.flightin isoform X1  
NA KXJ71309.1 hypothei XP\_001658901.1.chorion transcription factor CF2

|                                                                 |                     |                     |                    |               |                |                |                                    |                |                                                                |
|-----------------------------------------------------------------|---------------------|---------------------|--------------------|---------------|----------------|----------------|------------------------------------|----------------|----------------------------------------------------------------|
| AAEL0031: alcohol dehydrogenase [NADP(+)]                       | -0.334228708573481  | 0.0197504607544883  | 0.227464004834545  | NA            | aag01100 ; aag | XP_001656491.2 | alcX                               | XP_001656491.2 | alcohol dehydrogenase [NADP(+)]                                |
| AAEL0141: zinc finger protein 652-B                             | -0.333793160678031  | 0.19447334836315    | 0.625933456326584  | NA            | NA             | NA             |                                    | XP_001648101.2 | zinc finger protein 652-B                                      |
| AAEL0201: NA                                                    | -0.333634161313013  | 0.0375829669846728  | 0.30659483176736   | NA            | NA             | NA             |                                    | XP_021698692.1 | protein l'm not dead yet                                       |
| AAEL0148: multiple inositol polyphosphate phosphatase 1         | -0.333534379019826  | 0.0434699391455746  | 0.32922665020228   | NA            | aag01100 ; aag | NA             |                                    | XP_021697516.1 | multiple inositol polyphosphate phosphatase 1                  |
| AAEL0209: NA                                                    | -0.333250674296764  | 0.0381050388259921  | 0.308392759258381  | NA            | NA             | NA             |                                    | NA             |                                                                |
| AAEL0098: uncharacterized LOC5572535                            | -0.333177087159965  | 0.0106329449198883  | 0.166147088221529  | NA            | NA             | NA             |                                    | XP_021698688.1 | uncharacterized protein LOC5572535                             |
| AAEL0216: NA                                                    | -0.33315044651284   | 0.336775484558032   | 0.758445425575872  | NA            | NA             | NA             |                                    | XP_021694867.1 | centrosomal protein of 162 kDa isoform X5                      |
| AAEL0025: serine proteinase stubble                             | -0.333024339186723  | 0.10520663866251    | 0.489435979864721  | NA            | NA             | KXJ71089.1     | hypotheI                           | XP_001655709.1 | serine proteinase stubble                                      |
| AAEL0144: uncharacterized LOC5564435                            | -0.332972203908006  | 0.458524946673686   | 0.833308308986236  | NA            | NA             | NA             |                                    | XP_001648775.2 | uncharacterized protein LOC5564435                             |
| AAEL0025: trypase                                               | -0.3328189770019544 | 0.0100032526414244  | 0.161638111035661  | NA            | NA             | XP_019531788.1 | PRE                                | XP_019531788.1 | trypase-like                                                   |
| AAEL0105: aldose 1-epimerase                                    | -0.33271169028306   | 0.0417970019127372  | 0.322935358187244  | 00010 ; 00052 | aag01100 ; aag | KXJ77062.1     | hypotheI                           | XP_001654671.2 | aldose 1-epimerase                                             |
| AAEL0044: probable ATP-dependent RNA helicase DDX28             | -0.332711094528156  | 0.0641137454509227  | 0.395160539611112  | NA            | NA             | KXJ70985.1     | hypotheI                           | XP_001649227.1 | probable ATP-dependent RNA helicase DDX28                      |
| AAEL0085: protein cueball                                       | -0.332690531219496  | 0.00774810691687057 | 0.143746128727909  | NA            | NA             | XP_019554788.1 | PRE                                | XP_001653297.1 | protein cueball isoform X3                                     |
| AAEL0197: NA                                                    | -0.331446432395582  | 0.0461001403595705  | 0.341281972315984  | NA            | NA             | XP_021711681.1 | uncharacterized protein LOC5569133 | isoform X3     |                                                                |
| AAEL0134: TM2 domain-containing protein almondex                | -0.330895995858741  | 0.213118027656914   | 0.646373717545434  | NA            | NA             | NA             |                                    | XP_001663631.1 | TM2 domain-containing protein almondex                         |
| AAEL0121: trifunctional nucleotide phosphoesterase protein YfkN | -0.330730619255572  | 0.0119706448500635  | 0.176811996645721  | NA            | aag01100 ; aag | NA             |                                    | XP_021696043.1 | uncharacterized protein LOC5575910 isoform X1                  |
| AAEL0110: paxillin                                              | -0.330497017100571  | 0.0479254353497696  | 0.348612005978262  | NA            | NA             | KXJ70676.1     | hypotheI                           | XP_019552173.1 | transforming growth factor beta-1-induced transcript 1 protein |
| AAEL0232: NA                                                    | -0.330390236370259  | 0.33404728636149    | 0.756373801451385  | NA            | NA             | NA             |                                    | NA             |                                                                |
| AAEL0290: NA                                                    | -0.330330535372739  | 0.765335801227895   | 0.939016005719879  | NA            | NA             | NA             |                                    | XP_001861740.1 | ccropin A                                                      |
| AAEL0222: NA                                                    | -0.330095924569412  | 0.148130125930283   | 0.562679383080301  | NA            | NA             | NA             |                                    | XP_021701851.1 | progestin and adipoQ receptor family member 3 isoform X1       |
| AAEL0107: transmembrane protease serine 9                       | -0.329873968841323  | 0.0374347841812714  | 0.305927960955648  | NA            | NA             | XP_019538268.1 | PRE                                | XP_001654875.3 | transmembrane protease serine 9                                |
| AAEL0236: NA                                                    | -0.329869881488457  | 0.0525885799165915  | 0.362633125106993  | NA            | NA             | NA             |                                    | XP_021710043.1 | ldiso-interacting protein 2 isoform X8                         |
| AAEL0275: NA                                                    | -0.329716746523154  | 0.0420848913632536  | 0.323800309636003  | NA            | aag04320       | NA             |                                    | XP_021706628.1 | DNA-binding protein K10                                        |
| AAEL0013: bifunctional endo-1,4-beta-xylanase XylA              | -0.329683804333148  | 0.0174331324713232  | 0.214412616901924  | NA            | NA             | NA             |                                    | XP_001653158.1 | uncharacterized protein LOC5570331                             |
| AAEL0136: ribosome-releasing factor 2, mitochondrial            | -0.329577201679655  | 0.0262191561788137  | 0.264259227992819  | NA            | NA             | NA             |                                    | XP_021701538.1 | ribosome-releasing factor 2, mitochondrial                     |
| AAEL0198: NA                                                    | -0.32935587223932   | 0.0114608310013493  | 0.172833431546296  | NA            | NA             | NA             |                                    | XP_021711062.1 | trichohyalin isoform X4                                        |
| AAEL0003: uncharacterized LOC5575127                            | -0.329065002059775  | 0.262891764559686   | 0.696891172339274  | NA            | NA             | KXJ75620.1     | hypotheI                           | XP_021697892.1 | uncharacterized protein LOC5575127 isoform X1                  |
| AAEL0097: uncharacterized LOC5572349                            | -0.3288372407720253 | 0.0842993331296519  | 0.44100196899321   | 310           | aag01100 ; aag | NA             |                                    | ETN6222.1      | epsilon-trimethyllysine 2-oxoglutarate dioxygenase             |
| AAEL0048: ankyrin repeat-containing protein kinase A            | -0.32790420136667   | 0.091683546333893   | 0.459954188094628  | NA            | NA             | XP_001863747.1 | con                                | XP_021697770.1 | ankyrin repeat-containing protein kinase A                     |
| AAEL0094: NA                                                    | -0.327588092442715  | 0.163745855296404   | 0.581771953836875  | NA            | NA             | NA             |                                    | XP_001660065.2 | proline-rich protein PRCC                                      |
| AAEL0148: uncharacterized LOC5565331                            | -0.327489131124638  | 0.187921952264404   | 0.614955645070072  | NA            | NA             | NA             |                                    | KFB35878.1     | IAGAP001594-like protein                                       |
| AAEL0173: farnesol dehydrogenase-like                           | -0.327378331887296  | 0.0864125722317124  | 0.447730005448321  | NA            | aag00981 ; aag | NA             |                                    | XP_011492953.2 | farnesol dehydrogenase-like                                    |
| AAEL0134: transmembrane protein 39A-B                           | -0.327304345434609  | 0.107832752169067   | 0.493915871308953  | NA            | NA             | NA             |                                    | XP_001663666.2 | transmembrane protein 39A-B                                    |
| AAEL0063: upstream stimulatory factor 1                         | -0.32691081933753   | 0.223267732330087   | 0.65560825511079   | NA            | NA             | XP_019543518.1 | PRE                                | XP_001651889.2 | upstream stimulatory factor 1 isoform X1                       |
| AAEL0155: rhythmically expressed gene 2 protein                 | -0.326793402447301  | 0.145546430271966   | 0.558950568057442  | NA            | NA             | NA             |                                    | XP_001647614.2 | rhythmically expressed gene 2 protein                          |
| AAEL0245: NA                                                    | -0.326277943326042  | 0.0190352065593318  | 0.225171411092632  | NA            | NA             | NA             |                                    | XP_021697964.1 | uncharacterized protein LOC5573987 isoform X5                  |
| AAEL0271: NA                                                    | -0.325500632766584  | 0.209073360422917   | 0.639832374753494  | NA            | NA             | NA             |                                    | NA             |                                                                |
| AAEL0103: nucleoporin GLE1                                      | -0.325495381381623  | 0.204902419233046   | 0.637782699712521  | NA            | NA             | NA             |                                    | XP_001654472.1 | nucleoporin GLE1                                               |
| AAEL0254: NA                                                    | -0.325086947489208  | 0.11101746522622    | 0.502395086491705  | NA            | NA             | NA             |                                    | XP_021706442.1 | uncharacterized protein LOC5565785                             |
| AAEL0100: ATP-binding cassette sub-family D member 2            | -0.324999141133047  | 0.0116229211136465  | 0.173701685309403  | NA            | aag04146 ; aag | NA             |                                    | XP_001654181.2 | ATP-binding cassette sub-family D member 2                     |
| AAEL0010: uncharacterized LOC5579889                            | -0.324164346073666  | 0.0457277563593015  | 0.340242012934121  | NA            | NA             | KXJ73902.1     | hypotheI                           | XP_001657868.2 | uncharacterized protein LOC5579889                             |
| AAEL0022: gastrula zinc finger protein XICGF7.1, myoneurin      | -0.323896820193276  | 0.439390695897846   | 0.822472169172494  | NA            | NA             | KXJ68065.1     | hypotheI                           | XP_019531435.1 | zinc finger protein 84-like                                    |
| AAEL0129: CCR4-NOT transcription complex subunit 6-like         | -0.323846121727916  | 0.3254482468217181  | 0.260483612072803  | NA            | aag03018       | NA             |                                    | XP_021713020.1 | CCR4-NOT transcription complex subunit 6-like                  |
| AAEL0201: NA                                                    | -0.323647155065253  | 0.0777493044871216  | 0.427133790979399  | NA            | NA             | NA             |                                    | XP_021696498.1 | glycogen-binding subunit 76A isoform X4                        |
| AAEL0187: NA                                                    | -0.323596669111792  | 0.0276936581755348  | 0.2710962686901832 | NA            | NA             | NA             |                                    | XP_021706681.1 | SLIT-ROBO Rho GTPase-activating protein 1 isoform X2           |
| AAEL0008: protein germ cell-less                                | -0.323510920050126  | 0.0152503869376103  | 0.198907702459398  | NA            | NA             | KXJ72310.1     | hypotheI                           | XP_001651601.1 | protein germ cell-less                                         |
| AAEL0044: uncharacterized LOC5564929                            | -0.323445834058553  | 0.217053437946766   | 0.649748124914163  | NA            | NA             | KFB39996.1     | hypotheI                           | XP_001649268.1 | uncharacterized protein LOC5564929                             |
| AAEL0235: NA                                                    | -0.323331985615206  | 0.00697805072925916 | 0.137411930736898  | NA            | NA             | NA             |                                    | XP_021698384.1 | uncharacterized protein LOC5568876                             |
| AAEL0121: troponin C                                            | -0.323227286489537  | 0.00756109672796198 | 0.142284687302058  | NA            | NA             | XP_001846408.1 | troj                               | XP_001662251.1 | troponin C isoform X2                                          |
| AAEL0202: NA                                                    | -0.323108221917375  | 0.0513998605087107  | 0.359690131564899  | NA            | NA             | NA             |                                    | XP_021694472.1 | uncharacterized protein LOC110674718 isoform X1                |
| AAEL0142: uncharacterized LOC5563757                            | -0.32305713407452   | 0.0676285166504381  | 0.40094231299198   | NA            | NA             | NA             |                                    | XP_021709436.1 | uncharacterized protein LOC5563757                             |
| AAEL0057: serine protease snake                                 | -0.323026705969466  | 0.00976443758101401 | 0.160737664795154  | NA            | NA             | KXJ77889.1     | hypotheI                           | XP_001651417.1 | serine protease snake isoform X1                               |
| AAEL0083: uncharacterized LOC5570460                            | -0.322666899410071  | 0.107381737253576   | 0.492585616254939  | NA            | NA             | KXJ81357.1     | hypotheI                           | XP_001653199.2 | uncharacterized protein LOC5570460                             |
| AAEL0131: Na(+)/H(+) exchange regulatory cofactor NHE-RF1       | -0.322001176772909  | 0.00933888719363235 | 0.158773875613038  | NA            | NA             | NA             |                                    | XP_001663319.1 | Na(+)/H(+) exchange regulatory cofactor NHE-RF1                |
| AAEL0054: macrophage erythroblast attacker                      | -0.321942418537685  | 0.0190332149471032  | 0.225171411092632  | NA            | NA             |                |                                    |                |                                                                |

|                                                                      |                    |                     |                    |                         |            |                |                          |                                                                    |
|----------------------------------------------------------------------|--------------------|---------------------|--------------------|-------------------------|------------|----------------|--------------------------|--------------------------------------------------------------------|
| AAEL0101f NA                                                         | -0.316658031525265 | 0.679671026012179   | 0.914629465876247  | NA                      | NA         | NA             | XP_001660673.2           | trypsin 5G1-like                                                   |
| AAEL0197f NA                                                         | -0.316443528418512 | 0.0896155686483745  | 0.45743198048147   | 00564 ; 00591 ; 00565 ; | aag01100 ; | aag NA         | XP_021708996.1           | uncharacterized protein LOC5571127 isoform X3                      |
| AAEL0131f perlucin                                                   | -0.316408735628499 | 0.0793022978811354  | 0.430779070308269  | NA                      | NA         | NA             | XP_019528442.1           | PRE ABF18198.1salivary C-type lectin                               |
| AAEL0037f 4-hydroxybutyrate coenzyme A transferase                   | -0.316089810509753 | 0.00727053885496829 | 0.139382288632121  | NA                      | NA         | NA             | XP_001845554.1           | 4-H XP_001845554.14-Hydroxybutyrate CoA-transferase                |
| AAEL0236f NA                                                         | -0.315585897599216 | 0.489100321857538   | 0.849220154814801  | NA                      | NA         | NA             | XP_021695107.1           | protein RCC2 homolog                                               |
| AAEL0290f NA                                                         | -0.315506100301881 | 0.025100210290208   | 0.258647407716119  | NA                      | NA         | NA             | ABF18188.1               | predicted salivary secreted peptide                                |
| AAEL0058f flap endonuclease 1                                        | -0.315448652006732 | 0.06304076024842087 | 0.39272109689124   | NA                      | aag03030 ; | aag ETN66057.1 | flap end XP_021711510.1  | flap endonuclease 1                                                |
| AAEL0019f ejaculatory bulb-specific protein 3                        | -0.31527423903794  | 0.0155703251167462  | 0.201233331073453  | NA                      | NA         | NA             | KFB39459.1               | AGAP00_XP_001660749.1ejaculatory bulb-specific protein 3           |
| AAEL0041f TBC1 domain family member 10A                              | -0.315254187396229 | 0.0392737437415758  | 0.313353264954028  | NA                      | NA         | KXJ73657.1     | hypothei XP_001648503.2  | TBC1 domain family member 10A                                      |
| AAEL0196f NA                                                         | -0.315210590615899 | 0.0502398130336336  | 0.356468207181388  | NA                      | NA         | NA             | XP_021708108.1           | proline-rich extensin-like protein EPR1 isoform X2                 |
| AAEL0084f Golgi-associated plant pathogenesis-related protein 1      | -0.315201830019279 | 0.0544439429359877  | 0.367469712613638  | NA                      | NA         | KXJ82507.1     | hypothei XP_001659272.1  | Golgi-associated plant pathogenesis-related protein 1              |
| AAEL0031f uncharacterized LOC5577237                                 | -0.314930011102623 | 0.0149371253020275  | 0.19720434294011   | NA                      | NA         | KXJ70659.1     | hypothei XP_001656343.1  | uncharacterized protein LOC5577237                                 |
| AAEL0008f tyrosine kinase receptor Cad96Ca                           | -0.314923093791462 | 0.188923444384664   | 0.616603527036593  | NA                      | NA         | XP_019537938.1 | PRE XP_021705357.1       | tyrosine kinase receptor Cad96Ca                                   |
| AAEL0049f oral cancer-overexpressed protein 1 homolog                | -0.314825309887749 | 0.388498120795111   | 0.7930325667159852 | NA                      | NA         | XP_001866634.1 | con XP_001650093.2       | oral cancer-overexpressed protein 1 homolog                        |
| AAEL0197f NA                                                         | -0.314502776865018 | 0.0206173378196056  | 0.233690584681458  | NA                      | NA         | NA             | XP_021698753.1           | ion transport peptide-like isoform X1                              |
| AAEL0069f probable cytochrome P450 28a5                              | -0.314327556587563 | 0.153362247686967   | 0.568818435996349  | NA                      | NA         | KXJ73463.1     | hypothei XP_001652486.1  | probable cytochrome P450 28a5                                      |
| AAEL0114f chitinase domain-containing protein 1                      | -0.314108215571795 | 0.150897109391931   | 0.566025396924239  | NA                      | NA         | KXJ80469.1     | hypothei XP_021701718.1  | chitinase domain-containing protein 1                              |
| AAEL0074f titin                                                      | -0.3140384603424   | 0.0106415546401586  | 0.166147088221529  | NA                      | NA         | XP_019525720.1 | PRE XP_021698681.1       | titin isoform X1                                                   |
| AAEL0041f short-chain specific acyl-CoA dehydrogenase, mitochondrial | -0.313855963117101 | 0.31904504900709    | 0.745684464362801  | NA                      | NA         | KXJ73655.1     | hypothei XP_001648505.2  | short-chain specific acyl-CoA dehydrogenase, mitochondrial         |
| AAEL0195f NA                                                         | -0.313796311798489 | 0.24312919202023    | 0.677870931254677  | NA                      | NA         | NA             | XP_019932032.1           | titin-like                                                         |
| AAEL0200f NA                                                         | -0.313772921000184 | 0.525696775889557   | 0.865680248818465  | NA                      | NA         | NA             | NA                       | NA                                                                 |
| AAEL0108f tyramine beta-hydroxylase                                  | -0.313721884478215 | 0.407632655151319   | 0.803607536382376  | NA                      | aag01100 ; | aag KFB41858.1 | AGAP01_XP_021707312.1    | tyramine beta-hydroxylase                                          |
| AAEL0078f striatin-interacting protein 1 homolog                     | -0.313620362642508 | 0.306463224612641   | 0.281224109837052  | NA                      | NA         | XP_019544861.1 | PRE XP_021703868.1       | striatin-interacting protein 1 homolog isoform X3                  |
| AAEL0090f bicaudal D-related protein homolog                         | -0.313559956808166 | 0.0559457120965943  | 0.371974308318541  | NA                      | NA         | XP_019545187.1 | PRE XP_001653670.1       | bicaudal D-related protein homolog isoform X1                      |
| AAEL0116f CXXC-type zinc finger protein 1                            | -0.31347885397913  | 0.103609270022126   | 0.486291766544946  | NA                      | NA         | ETN60493.1     | cpb bind XP_021710746.1  | CXXC-type zinc finger protein 1                                    |
| AAEL0149f sterile alpha and TIR motif-containing protein 1           | -0.313454960337577 | 0.0130444928602998  | 0.183852669789472  | NA                      | NA         | NA             | XP_021698316.1           | sterile alpha and TIR motif-containing protein 1 isoform X5        |
| AAEL0046f protein unc-13 homolog 4B                                  | -0.313279146247036 | 0.0394617601157575  | 0.31353264954028   | NA                      | NA         | XP_019541322.1 | PRE XP_021705668.1       | protein unc-13 homolog 4B isoform X1                               |
| AAEL0097f protein FAM32A                                             | -0.313059197241078 | 0.12092970857094    | 0.522930064976407  | NA                      | NA         | NA             | XP_001654043.1           | protein FAM32A                                                     |
| AAEL0038f mitochondrial GTPase 1-like                                | -0.312943294346121 | 0.3803721177791926  | 0.786294135283846  | NA                      | NA         | XP_019525780.1 | PRE XP_021696520.1       | mitochondrial GTPase 1-like isoform X1                             |
| AAEL0080f cytoplasmic FMR1-interacting protein                       | -0.312758486683928 | 0.0935553483737437  | 0.464823706598816  | NA                      | aag03013   | ETN65677.1     | specific2 XP_021695776.1 | cytoplasmic FMR1-interacting protein                               |
| AAEL0229f NA                                                         | -0.312586724529386 | 0.144913696326489   | 0.558181596314924  | NA                      | NA         | NA             | XP_001660443.2           | exocyst complex component 7                                        |
| AAEL0085f zinc finger protein 675                                    | -0.312526844964239 | 0.37172929620509    | 0.781817769662763  | NA                      | NA         | XP_019533163.1 | PRE XP_021693851.1       | zinc finger protein 675                                            |
| AAEL0253f NA                                                         | -0.312471837851196 | 0.0965490806467669  | 0.470574140660778  | NA                      | NA         | NA             | XP_021703333.1           | uncharacterized protein LOC5573899                                 |
| AAEL0113f NA                                                         | -0.312082343455095 | 0.153128491176915   | 0.568713993417967  | NA                      | NA         | KXJ74320.1     | hypothei XP_001661613.2  | dnal homolog subfamily C member 22                                 |
| AAEL0095f serine protease 53                                         | -0.312055310209182 | 0.384031763790244   | 0.790063144962496  | NA                      | NA         | NA             | XP_021708575.1           | serine protease 53                                                 |
| AAEL0033f alpha-tocopherol transfer protein-like                     | -0.311539945366551 | 0.0195996671392731  | 0.227335564593981  | NA                      | NA         | KXJ72862.1     | hypothei XP_001656682.1  | retinaldehyde-binding protein 1 isoform X1                         |
| AAEL0126f uncharacterized LOC5576655                                 | -0.311513015834762 | 0.365840872508423   | 0.779835687469172  | 901 NA                  | 901 NA     | XP_001864962.1 | Juv XP_001864962.1       | juvenile hormone-inducible protein                                 |
| AAEL0007f probable peroxisomal acyl-coenzyme A oxidase 1             | -0.311330933983549 | 0.201741227072612   | 0.634701781910801  | 00071 ; 00592           | NA         | KXJ82980.1     | hypothei XP_001650659.2  | probable peroxisomal acyl-coenzyme A oxidase 1                     |
| AAEL0173f mitogen-activated protein kinase kinase kinase kinase 3    | -0.311185055894864 | 0.0533857982764843  | 0.365578024386907  | 04151 ; 05165 ; 04714 ; | NA         | NA             | XP_021710912.1           | mitogen-activated protein kinase kinase kinase kinase 3 isoform X3 |
| AAEL0105f actin cytoskeleton-regulatory complex protein pan1         | -0.311077657413666 | 0.476503443551498   | 0.844867278451347  | NA                      | NA         | KXJ77063.1     | hypothei XP_021693953.1  | actin cytoskeleton-regulatory complex protein pan1                 |
| AAEL0215f NA                                                         | -0.310794686082375 | 0.0298065604331207  | 0.278836039075975  | NA                      | NA         | NA             | XP_021713275.1           | synaptic vesicle glycoprotein 2A                                   |
| AAEL0271f NA                                                         | -0.310785438011971 | 0.012736194197323   | 0.182308324322341  | 901 NA                  | 901 NA     | NA             | XP_021705648.1           | uncharacterized protein LOC5572971                                 |
| AAEL0073f succinate dehydrogenase assembly factor 3, mitochondrial   | -0.31075246294211  | 0.1685815401953646  | 0.5887236272389    | NA                      | NA         | KXJ79760.1     | hypothei XP_001652715.2  | succinate dehydrogenase assembly factor 3, mitochondrial           |
| AAEL0081f glutamate--cysteine ligase                                 | -0.310611433667302 | 0.0143580315487638  | 0.192318204238318  | 00270 ; 00480           | aag01100 ; | aag KXJ83847.1 | hypothei XP_001653117.1  | glutamate--cysteine ligase                                         |
| AAEL0128f endoplasmrin                                               | -0.310372681273979 | 0.00952165997684491 | 0.158773875613038  | NA                      | aag04141   | ETN62729.1     | endopla XP_019524856.1   | endoplasmrin-like                                                  |
| AAEL0195f NA                                                         | -0.309964348713799 | 0.0310633053466266  | 0.282455074900848  | NA                      | NA         | NA             | XP_021698057.1           | filamin-B isoform X1                                               |
| AAEL0088f uncharacterized LOC5571135                                 | -0.309736688186749 | 0.0765295400303224  | 0.422703978006619  | NA                      | aag04013   | KXJ83088.1     | hypothei XP_001659577.1  | uncharacterized protein LOC5571135                                 |
| AAEL0133f uncharacterized LOC5577784                                 | -0.309186662102507 | 0.191659038196747   | 0.621678529806887  | NA                      | NA         | NA             | XP_001663557.2           | uncharacterized protein LOC5577784                                 |
| AAEL0004f alpha-ketoglutarate-dependent dioxygenase alkB homolog 6   | -0.309124630064787 | 0.322464886157792   | 0.746650319748046  | NA                      | NA         | KXJ71577.1     | hypothei XP_001656428.1  | alpha-ketoglutarate-dependent dioxygenase alkB homolog 6           |
| AAEL0120f transcriptional activator cubitus interruptus              | -0.308722560178327 | 0.244916792120696   | 0.679727114240672  | NA                      | aag04341   | XP_019527861.1 | PRE XP_021713117.1       | transcriptional activator cubitus interruptus isoform X1           |
| AAEL0256f NA                                                         | -0.308658195367288 | 0.0291019297271803  | 0.275227088745645  | NA                      | NA         | NA             | XP_021692979.1           | centrosomal and chromosomal factor-like                            |
| AAEL0220f NA                                                         | -0.30863461361634  | 0.253227729979386   | 0.685145258966747  | NA                      | NA         | NA             | NA                       | NA                                                                 |
| AAEL0148f probable cytochrome P450 6a14                              | -0.308551704146526 | 0.0239901600499227  | 0.252872225405943  | NA                      | NA         | NA             | XP_001649932.1           | probable cytochrome P450 6a14                                      |
| AAEL0067f angiotensin-related protein 6                              | -0.308501136096498 | 0.0248062991849472  | 0.258221227488557  | NA                      | NA         | XP_019539651.1 | PRE XP_001657951.2       | angiotensin-related protein 6 isoform X1                           |
| AAEL0087f HIG1 domain family member 1A, mitochondrial                | -0.308043096282388 | 0.0197146034064331  | 0.227335564593981  | NA                      | NA         | XP_001867651.1 | HIG XP_001653423.1       | HIG1 domain family member 1A, mitochondrial isoform X1             |

|                                                                          |                    |                    |                   |                          |            |                      |                    |                                                                           |                                                         |
|--------------------------------------------------------------------------|--------------------|--------------------|-------------------|--------------------------|------------|----------------------|--------------------|---------------------------------------------------------------------------|---------------------------------------------------------|
| AAEL0050: uncharacterized LOC5565834                                     | -0.305137423546405 | 0.0135691043851478 | 0.187825791015408 | NA                       | NA         | KXJ76335.1 hypothe   | XP_021703643.1     | uncharacterized protein LOC5565834 isoform X1                             |                                                         |
| AAEL0072: uncharacterized LOC5568938                                     | -0.305084663723299 | 0.224493045807867  | 0.656638591075649 | NA                       | NA         | KXJ83143.1 hypothe   | XP_001658260.2     | uncharacterized protein LOC5568938                                        |                                                         |
| AAEL00721 fatty acyl-CoA reductase wat                                   | -0.305036766524329 | 0.0501556750876859 | 0.356468207181388 | 73                       | NA         | XP_019535045.1 PRÉ   | XP_001658219.2     | fatty acyl-CoA reductase wat isoform X2                                   |                                                         |
| AAEL0013: spingomyelin synthase-related 1                                | -0.304805245106952 | 0.15236084158213   | 0.568113296551786 | NA                       | NA         | KXJ69673.1 hypothe   | XP_021699512.1     | spingomyelin synthase-related 1                                           |                                                         |
| AAEL0072: acyl-CoA synthetase short-chain family member 3, mitochondrial | -0.304770735361516 | 0.0379150235489433 | 0.307682856236235 | 00010; 00640; 00620; aag | 01100; aag | KF851925.1 hypothe   | XP_021706231.1     | acyl-CoA synthetase short-chain family member 3, mitochondrial isoform X2 |                                                         |
| AAEL0066: uncharacterized LOC5568220                                     | -0.304727220477085 | 0.356433292413355  | 0.772867683747772 | NA                       | NA         | KXJ70772.1 hypothe   | XP_001652152.2     | uncharacterized protein LOC5568220                                        |                                                         |
| AAEL0057: protein abnormal spindle                                       | -0.30449811235038  | 0.356416143697957  | 0.772867683747772 | NA                       | NA         | KXJ77883.1 hypothe   | XP_021712945.1     | protein abnormal spindle                                                  |                                                         |
| AAEL0270: NA                                                             | -0.304328329252637 | 0.246995228196647  | 0.680385311739523 | NA                       | NA         | NA                   | XP_021706017.1     | ribosome biogenesis protein NOP53-like                                    |                                                         |
| AAEL0228: NA                                                             | -0.304247000186438 | 0.325604884941203  | 0.748896673349414 | NA                       | NA         | NA                   | XP_021699078.1     | uncharacterized protein LOC5572637 isoform X1                             |                                                         |
| AAEL0290: NA                                                             | -0.304243425064927 | 0.146615463818916  | 0.561212769576399 | NA                       | NA         | NA                   | EAT38081.1         | AAEL009992                                                                |                                                         |
| AAEL0080: uncharacterized LOC5569954                                     | -0.304191199367502 | 0.186981490095999  | 0.614196367514984 | NA                       | NA         | KXJ71449.1 hypothe   | XP_001658855.2     | uncharacterized protein LOC5569954                                        |                                                         |
| AAEL0202: NA                                                             | -0.304167384579479 | 0.136534659141384  | 0.545589928345625 | NA                       | NA         | NA                   | XP_021705013.1     | uncharacterized protein LOC5572960                                        |                                                         |
| AAEL0217: NA                                                             | -0.30414350967103  | 0.010261701656898  | 0.163088391445208 | NA                       | NA         | NA                   | XP_021696764.1     | uncharacterized protein LOC110675609                                      |                                                         |
| AAEL0104: alkylidihydroxyacetonephosphate synthase                       | -0.304109799456759 | 0.074568585706058  | 0.419169079991884 | 565                      | aag        | 01100; aag           | XP_021693470.1     | alkylidihydroxyacetonephosphate synthase                                  |                                                         |
| AAEL01161 collectin-10                                                   | -0.30403682130647  | 0.151198140405056  | 0.566025396924239 | NA                       | NA         | XP_001688638.1       | AG; XP_021698856.1 | collectin-10 isoform X2                                                   |                                                         |
| AAEL0226: NA                                                             | -0.303785444891328 | 0.0482818592898024 | 0.350110062399339 | NA                       | NA         | NA                   | XP_001661186.2     | protein G12                                                               |                                                         |
| AAEL0077: integrator complex subunit 12                                  | -0.303603873447063 | 0.288812162352359  | 0.721217831083796 | NA                       | NA         | KXJ78610.1 hypothe   | XP_021694321.1     | integrator complex subunit 12                                             |                                                         |
| AAEL0049: probable ATP-dependent RNA helicase DDX20                      | -0.303461285560947 | 0.0833401630293975 | 0.438013925780757 | aag                      | 03013      | XP_019525224.1 PRÉ   | XP_001650004.2     | probable ATP-dependent RNA helicase DDX20 isoform X1                      |                                                         |
| AAEL0002: solute carrier family 25 member 35                             | -0.303327967552322 | 0.187476285215601  | 0.614323480626963 | NA                       | NA         | KXJ77550.1 hypothe   | XP_001660132.1     | solute carrier family 25 member 35 isoform X1                             |                                                         |
| AAEL0117: integumentary mucin C.1                                        | -0.302812056075052 | 0.361546206820052  | 0.77623616312602  | NA                       | NA         | NA                   | XP_001661889.2     | integumentary mucin C.1 isoform X2                                        |                                                         |
| AAEL0229: NA                                                             | -0.302675220711457 | 0.0478316387796799 | 0.348612005978262 | NA                       | NA         | NA                   | XP_021693719.1     | huntingtin-interacting protein K                                          |                                                         |
| AAEL0231: NA                                                             | -0.302195025688652 | 0.0440543314958159 | 0.332013069962734 | aag                      | 04933; aag | NA                   | XP_021701992.1     | collagen alpha-1(V) chain                                                 |                                                         |
| AAEL0028: NA                                                             | -0.302183135764303 | 0.0177159851755932 | 0.21563822167435  | NA                       | NA         | NA                   | XP_021693313.1     | LOW QUALITY PROTEIN: uncharacterized protein LOC5576344                   |                                                         |
| AAEL0050: RNA-binding protein squid                                      | -0.301832586024831 | 0.270994251346944  | 0.706427507335574 | NA                       | NA         | KXJ78504.1 hypothe   | XP_001650293.2     | RNA-binding protein squid                                                 |                                                         |
| AAEL0058: aminopeptidase N                                               | -0.301686998442735 | 0.103209244999711  | 0.485796149609891 | 480                      | NA         | XP_019561879.1 PRÉ   | XP_001651477.2     | aminopeptidase N                                                          |                                                         |
| AAEL0033: dnaJ homolog subfamily 8 member 14                             | -0.30164996809639  | 0.0288685485648572 | 0.274601260220884 | NA                       | aag        | 04141                | KXJ70557.1 hypothe | XP_001656767.1                                                            | dnaJ homolog subfamily 8 member 14                      |
| AAEL0102: uncharacterized LOC5580039                                     | -0.3013250139924   | 0.0404397581902632 | 0.316225178415075 | NA                       | NA         | NA                   | AA52239.1          | putative 8.7 kDa secreted protein                                         |                                                         |
| AAEL0222: NA                                                             | -0.301264658131186 | 0.504685048934473  | 0.858744381072989 | NA                       | NA         | NA                   | XP_021694147.1     | histone deacetylase 11                                                    |                                                         |
| AAEL0000: L-dopachrome tautomerase yellow-f                              | -0.301043472738815 | 0.0488468099858121 | 0.351987741182022 | aag                      | 01100; aag | KXJ72581.1 hypothe   | XP_001647842.1     | L-dopachrome tautomerase yellow-f                                         |                                                         |
| AAEL0136: integrin alpha-P52                                             | -0.300972509941155 | 0.0190558352781888 | 0.225171411092632 | NA                       | NA         | NA                   | XP_021694910.1     | integrin alpha2 isoform X1                                                |                                                         |
| AAEL0267: NA                                                             | -0.300753992522169 | 0.03857381015906   | 0.310005415793598 | aag                      | 01100; aag | NA                   | XP_021699065.1     | xanthine dehydrogenase                                                    |                                                         |
| AAEL0252: NA                                                             | -0.300674702391354 | 0.12752096874305   | 0.532418008834123 | NA                       | NA         | NA                   | XP_021703407.1     | signal-induced proliferation-associated 1-like protein 2 isoform X1       |                                                         |
| AAEL0046: DTW domain-containing protein 1                                | -0.300323074887819 | 0.297983947482858  | 0.7302583490254   | NA                       | NA         | KXJ82449.1 hypothe   | XP_001649526.2     | DTW domain-containing protein 1                                           |                                                         |
| AAEL0003: integrin-linked protein kinase                                 | -0.298995505783839 | 0.0140758266269445 | 0.190425211307095 | NA                       | NA         | ETN59472.1 integrin- | XP_001655514.1     | integrin-linked protein kinase                                            |                                                         |
| AAEL0054: WASH complex subunit 2                                         | -0.298994704266451 | 0.305177744021646  | 0.738299809812121 | aag                      | 04144      | KXJ82349.1 hypothe   | XP_001650910.2     | WASH complex subunit 2                                                    |                                                         |
| AAEL0103: uncharacterized LOC5573307                                     | -0.298588208174833 | 0.405537037536213  | 0.801665267327225 | NA                       | NA         | NA                   | XP_021707322.1     | uncharacterized protein LOC5573307                                        |                                                         |
| AAEL0124: general transcriptional corepressor trfA                       | -0.298570141657768 | 0.283005907715897  | 0.715753918648043 | NA                       | NA         | NA                   | XP_001662585.2     | general transcriptional corepressor trfA isoform X2                       |                                                         |
| AAEL0050: GTP-binding protein Di-Ras2                                    | -0.298365359901176 | 0.281784329416438  | 0.715107379448722 | NA                       | NA         | KF842719.1 AGAP00    | XP_001650313.2     | GTP-binding protein Di-Ras2                                               |                                                         |
| AAEL0198: NA                                                             | -0.298239508783504 | 0.495813256131585  | 0.854555831227354 | NA                       | NA         | NA                   | XP_021703238.1     | zinc finger protein 2                                                     |                                                         |
| AAEL0129: nuclear pore complex protein Nup85                             | -0.298152374808334 | 0.163211650373975  | 0.581366301644056 | aag                      | 03013      | NA                   | XP_021706108.1     | nuclear pore complex protein Nup85                                        |                                                         |
| AAEL0025: myosin regulatory light chain 2                                | -0.297990745429324 | 0.0311201981274933 | 0.282649198438896 | NA                       | NA         | AA267334.1 putative  | XP_001655578.1     | myosin regulatory light chain 2                                           |                                                         |
| AAEL0137: presenilin-associated rhomboid-like protein, mitochondrial     | -0.297979188366126 | 0.183567218032764  | 0.611093779135432 | NA                       | NA         | NA                   | XP_001663953.1     | presenilin-associated rhomboid-like protein, mitochondrial                |                                                         |
| AAEL0068: microsomal glutathione S-transferase 1                         | -0.29792533013369  | 0.402355867874358  | 0.799341786858961 | NA                       | NA         | KF840178.1 AGAP00    | XP_021706344.1     | microsomal glutathione S-transferase 1                                    |                                                         |
| AAEL0124: slit homolog 1 protein                                         | -0.297904007345405 | 0.263378893353569  | 0.697643228739073 | NA                       | NA         | KXJ73948.1 hypothe   | XP_021698125.1     | slit homolog 1 protein                                                    |                                                         |
| AAEL0197: NA                                                             | -0.296742499819672 | 0.176948759825586  | 0.601952860597058 | aag                      | 04146; aag | NA                   | XP_021695730.1     | superoxide dismutase [Cu-Zn]                                              |                                                         |
| AAEL0048: NA                                                             | -0.296711467038504 | 0.279577069953164  | 0.713638889794457 | NA                       | NA         | KXJ75168.1 hypothe   | XP_001649918.2     | MIT domain-containing protein 1 isoform X1                                |                                                         |
| AAEL0191: zinc finger protein 449                                        | -0.296183519682018 | 0.382617590093608  | 0.788720220439378 | NA                       | NA         | KXJ68843.1 hypothe   | XP_001662036.2     | zinc finger protein 449                                                   |                                                         |
| AAEL0073: glucose-6-phosphate 1-epimerase                                | -0.295971236462465 | 0.106689806107174  | 0.492031204248678 | 10                       | aag        | 01100; aag           | CRLO2671.1 CLUMA_  | XP_019534297.1                                                            | glucose-6-phosphate 1-epimerase                         |
| AAEL0148: glycogenin-1                                                   | -0.295894734376805 | 0.0459274212954088 | 0.340551273779494 | NA                       | NA         | NA                   | XP_021695674.1     | nucleate primary sterigmata protein A isoform X1                          |                                                         |
| AAEL0219: NA                                                             | -0.295720237194183 | 0.0764963004924787 | 0.422703978006619 | 310                      | aag        | 01100; aag           | NA                 | XP_021704601.1                                                            | histone-lysine N-methyltransferase trithorax isoform X2 |
| AAEL0001: NA                                                             | -0.295679016410773 | 0.183620332461364  | 0.611093779135432 | NA                       | NA         | KXJ72229.1 hypothe   | XP_021707205.1     | D-amino-acid oxidase                                                      |                                                         |
| AAEL0142: aquaporin-11                                                   | -0.295400260263414 | 0.043021185427351  | 0.327632237384908 | NA                       | NA         | NA                   | XP_019529216.1     | aquaporin-12                                                              |                                                         |
| AAEL0172: serpin B8                                                      | -0.295386522169002 | 0.440583895517347  | 0.822798752521693 | NA                       | NA         | NA                   | XP_011493153.2     | serpin B8                                                                 |                                                         |
| AAEL0102: anoctamin-10                                                   | -0.29502983249599  | 0.0298471526287585 | 0.278836039075975 | NA                       | NA         | NA                   | XP_019534229.1     | anoctamin-10-like isoform X1                                              |                                                         |
| AAEL0015: uncharacterized LOC5571295                                     | -0.294942341286673 | 0.541513139455154  | 0.869735874782513 | NA                       | NA         | XP_001841995.1       | con                | XP_001653598.1                                                            | uncharacterized protein LOC5571295 isoform X2           |
| AAEL0100: protein FAM50 homolog                                          | -0.294919274965068 | 0.208282858331306  | 0.639832374753494 | NA                       | NA         | NA                   | XP_001654172.1     | protein FAM50 homolog                                                     |                                                         |
| AAEL0101: uncharacterized LOC5572927                                     | -0.294886116005657 | 0.01388808721107   | 0.188771468879804 | NA                       | NA         | NA                   | XP_021700684.1     | uncharacterized protein LOC5572927 isoform X4                             |                                                         |
| AAEL0138: uncharacterized LOC5578811                                     | -0.29477841562292  | 0.43320369670146   | 0.820258728065422 | NA                       | NA         | NA                   | XP_316466.3        | C-type lectin, galactose-binding (AGAP006430)                             |                                                         |
| AAEL0012: facilitated trehalose transporter Tret1                        | -0.29477497940592  | 0.211253697803495  | 0.643406565246605 | NA                       | NA         | KXJ73638.1 hypothe   | XP_001652873.1     | facilitated trehalose transporter Tret1                                   |                                                         |
| AAEL0059: 28S ribosomal protein S23, mitochondrial                       | -0.294617901021361 |                    |                   |                          |            |                      |                    |                                                                           |                                                         |

|                                                                      |                     |                    |                    |                          |               |                                                                                              |                                                                                     |
|----------------------------------------------------------------------|---------------------|--------------------|--------------------|--------------------------|---------------|----------------------------------------------------------------------------------------------|-------------------------------------------------------------------------------------|
| AAEL0146: NA                                                         | -0.289773783761146  | 0.233646251627374  | 0.667084333687587  | NA                       | NA            | NA                                                                                           | XP_021698248.117-beta-hydroxysteroid dehydrogenase 13                               |
| AAEL0169: solute carrier family 23 member 2                          | -0.289563410256457  | 0.0394430836709053 | 0.313353264954028  | NA                       | NA            | NA                                                                                           | XP_021705930.1solute carrier family 23 member 2 isoform X1                          |
| AAEL0076: protein bunched, class 2/F/G isoform                       | -0.289250840816295  | 0.0181061129322648 | 0.217871885086637  | NA                       | NA            | NA                                                                                           | KFB34953.1 AGAP01_XP_021700469.1protein bunched, class 2/F/G isoform                |
| AAEL0260: NA                                                         | -0.289111405408488  | 0.276962868642374  | 0.712300862136256  | NA                       | NA            | NA                                                                                           | ---NA---                                                                            |
| AAEL0181: cytochrome c1, heme protein, mitochondrial                 | -0.289040438357249  | 0.0453838463911056 | 0.338330197910056  | NA                       | aag01100; aag | ETN66619.1 cytochr                                                                           | XP_001662013.1cytochrome c1, heme protein, mitochondrial                            |
| AAEL0198: NA                                                         | -0.288726622407551  | 0.116986264981421  | 0.514582987743323  | NA                       | 901 NA        | NA                                                                                           | XP_021704855.1uncharacterized protein LOC5564429                                    |
| AAEL0082: pupal cuticle protein Edg-78E                              | -0.288691800610696  | 0.0205623624014343 | 0.233598591133332  | NA                       | NA            | ETN66852.1 cuticular                                                                         | XP_019539066.1 pupal cuticle protein Edg-78E-like                                   |
| AAEL0106: uncharacterized LOC5573649                                 | -0.28848915289335   | 0.049606917912162  | 0.35468753584127   | NA                       | NA            | KXJ70273.1 hypothe                                                                           | XP_001660975.1uncharacterized protein LOC5573649                                    |
| AAEL0028: uncharacterized LOC5576223                                 | -0.288422845248271  | 0.0471798967433995 | 0.346180765881814  | NA                       | aag01100; aag | KXJ74193.1 hypothe                                                                           | XP_001848343.1NADH:ubiquinone dehydrogenase                                         |
| AAEL0277: NA                                                         | -0.288151435951591  | 0.0346153661009331 | 0.294935739685914  | NA                       | aag01100; aag | NA                                                                                           | XP_021707104.1NADH-ubiquinone oxidoreductase subunit 8                              |
| AAEL0010: uncharacterized LOC5568364                                 | -0.287813662613002  | 0.465805665345301  | 0.838483018891546  | NA                       | NA            | KFB53548.1 hypothe                                                                           | XP_001658016.1uncharacterized protein LOC5568364                                    |
| AAEL0253: NA                                                         | -0.287778500479556  | 0.152467929569436  | 0.568113296551786  | NA                       | NA            | NA                                                                                           | XP_021705052.1CD109 antigen-like                                                    |
| AAEL0201: NA                                                         | -0.287081992505128  | 0.0414451320922714 | 0.321025341340978  | NA                       | NA            | NA                                                                                           | XP_021703013.1microfibril-associated glycoprotein 4-like                            |
| AAEL0143: RNA polymerase II degradation factor 1                     | -0.287041929676701  | 0.0368375082875562 | 0.303201029751424  | NA                       | NA            | NA                                                                                           | XP_001648422.1RNA polymerase II degradation factor 1                                |
| AAEL0114: proline-rich extensin-like protein EPR1                    | -0.286719205495297  | 0.288763709512536  | 0.721217831038796  | NA                       | NA            | XP_019527181.1 PRE                                                                           | XP_021696262.1proline-rich extensin-like protein EPR1 isoform X2                    |
| AAEL0071: probable ATP-dependent RNA helicase kurz                   | -0.286335982305835  | 0.0763761076460798 | 0.422703978006619  | NA                       | NA            | KXJ72274.1 hypothe                                                                           | XP_021704688.1probable ATP-dependent RNA helicase kurz                              |
| AAEL0065: adapter molecule Crk                                       | -0.28575588903145   | 0.505406422711254  | 0.858744381072989  | NA                       | NA            | ETN60685.1 crk [Ano                                                                          | XP_001652002.1adapter molecule Crk                                                  |
| AAEL0013: probable small nuclear ribonucleoprotein Sm D1             | -0.285682429266339  | 0.131516213583928  | 0.538981683630591  | NA                       | aag03040      | ETN68120.1 small nu                                                                          | XP_001653165.1probable small nuclear ribonucleoprotein Sm D1                        |
| AAEL0195: NA                                                         | -0.285609714711332  | 0.0271896203770644 | 0.26883665026084   | NA                       | NA            | NA                                                                                           | XP_021695777.1facilitated trehalose transporter Tret1-2 homolog                     |
| AAEL0012: uncharacterized LOC5569806                                 | -0.284838518723379  | 0.0808998708963497 | 0.433079891352508  | NA                       | NA            | ETN63779.1 hypothe                                                                           | XP_001493405.1uncharacterized protein LOC5569806                                    |
| AAEL0032: transmembrane protease serine 9                            | -0.284551022676877  | 0.22879661867396   | 0.662455890682856  | NA                       | NA            | XP_019531243.1 PRE                                                                           | XP_001656659.2transmembrane protease serine 9                                       |
| AAEL0204: NA                                                         | -0.28412225954091   | 0.0395397919765812 | 0.313353264954028  | NA                       | NA            | NA                                                                                           | XP_021696724.1 titin                                                                |
| AAEL0098: microtubule-associated protein futsch                      | -0.284119803843877  | 0.028983633227999  | 0.275227088745645  | NA                       | NA            | NA                                                                                           | XP_021710788.1microtubule-associated protein futsch                                 |
| AAEL0125: myosin heavy chain, striated muscle                        | -0.284086773070576  | 0.0512436511227153 | 0.359690131564899  | NA                       | NA            | KFB4848.1 Ofd1 prc                                                                           | XP_001662695.1myosin heavy chain, striated muscle                                   |
| AAEL0054: alpha-N-acetylgalactosaminidase                            | -0.284058125510295  | 0.303225531308126  | 0.28095996069086   | 00561; 00052; 00603; aag | 01100; aag    | KFB39533.1 AGAP00                                                                            | XP_019543023.1 alpha-N-acetylgalactosaminidase-like                                 |
| AAEL0137: uncharacterized LOC5578593                                 | -0.284051207251212  | 0.0365122746424301 | 0.301874170044602  | NA                       | NA            | NA                                                                                           | XP_021700849.1uncharacterized protein LOC5578593                                    |
| AAEL0011: probable 4-coumarate--CoA ligase 1                         | -0.284024847636032  | 0.0163223150555526 | 0.20659964668665   | NA                       | NA            | OWR45044.1 putativ                                                                           | XP_001652383.2probable 4-coumarate--CoA ligase 1                                    |
| AAEL0060: probable methyltransferase-like protein 15 homolog         | -0.283762468126221  | 0.0363770867414066 | 0.301569326301282  | NA                       | NA            | KXJ75553.1 hypothe                                                                           | XP_001657398.1probable methyltransferase-like protein 15 homolog                    |
| AAEL0051: uncharacterized LOC5566175                                 | -0.2829200727663418 | 0.0914883395901747 | 0.459288434349932  | NA                       | NA            | ETN66491.1 hypothe                                                                           | XP_001650523.1uncharacterized protein LOC5566175                                    |
| AAEL0006: mpv17-like protein                                         | -0.282906783905311  | 0.0969309976559201 | 0.470633908275356  | NA                       | aag04146      | ETN67758.1 hypothe                                                                           | XP_001649804.1mpv17-like protein                                                    |
| AAEL0040: echinoderm microtubule-associated protein-like 2           | -0.282538997264545  | 0.0356084843330783 | 0.299241345052956  | NA                       | NA            | XP_019556863.1 PRE                                                                           | XP_001648438.2echinoderm microtubule-associated protein-like 2 isoform X2           |
| AAEL0022: uncharacterized LOC5574102                                 | -0.282038473770989  | 0.4560337372570556 | 0.832617462606238  | NA                       | NA            | KXJ70501.1 hypothe                                                                           | XP_001866315.1arylalkylamine N-acetyltransferase                                    |
| AAEL0046: protein Fe65 homolog                                       | -0.281682284294179  | 0.226532754184916  | 0.660446829146891  | NA                       | NA            | XP_019550238.1 PRE                                                                           | XP_021706960.1protein Fe65 homolog isoform X5                                       |
| AAEL0068: major facilitator superfamily domain-containing protein 12 | -0.281404276831574  | 0.0401442449358897 | 0.314545859748141  | NA                       | NA            | KXJ75918.1 hypothe                                                                           | XP_001652284.1major facilitator superfamily domain-containing protein 12            |
| AAEL0027: leukocyte elastase inhibitor                               | -0.281266465746362  | 0.0179761751672368 | 0.217327183278252  | NA                       | NA            | XP_001848442.1 seri                                                                          | XP_001662183.2leukocyte elastase inhibitor                                          |
| AAEL0195: NA                                                         | -0.281026443576263  | 0.381371542193497  | 0.787361680182234  | NA                       | NA            | NA                                                                                           | XP_021710776.1reversion-inducing cysteine-rich protein with Kazal motifs isoform X1 |
| AAEL0128: N-acyleuraminatase cytidyllyltransferase A                 | -0.280872093063836  | 0.489598885025022  | 0.8494134502626291 | 540 aag01100; aag        | NA            | NA                                                                                           | XP_001663017.1N-acyleuraminatase cytidyllyltransferase A                            |
| AAEL0222: NA                                                         | -0.280643522720377  | 0.306528597343146  | 0.738783696372872  | NA                       | NA            | NA                                                                                           | XP_021693403.1lysyl oxidase homolog 2B                                              |
| AAEL0031: excitatory amino acid transporter 1                        | -0.280567566272075  | 0.0247053091013696 | 0.257753122846716  | NA                       | NA            | NA                                                                                           | XP_001656353.2excitatory amino acid transporter 1                                   |
| AAEL0069: sodium-coupled monocarboxylate transporter 1               | -0.280377008543324  | 0.0511538559573254 | 0.359690131564899  | NA                       | NA            | ETN61805.1 hypothe                                                                           | XP_001652483.1sodium-coupled monocarboxylate transporter 1 isoform X1               |
| AAEL0132: uncharacterized LOC5547706                                 | -0.280375026270271  | 0.0941249350186221 | 0.464823706598816  | NA                       | NA            | KXJ75409.1 hypothe                                                                           | XP_001661603.1uncharacterized protein LOC5547706                                    |
| AAEL0106: uncharacterized LOC5573691                                 | -0.280333764633524  | 0.152149400865319  | 0.568113296551786  | NA                       | NA            | XP_001843372.1 con                                                                           | XP_021695485.1uncharacterized protein LOC5573691                                    |
| AAEL0117: uncharacterized LOC5575275                                 | -0.280083969560407  | 0.15839710729492   | 0.576186113877291  | NA                       | NA            | NA                                                                                           | XP_001661881.1uncharacterized protein LOC5575275 isoform X1                         |
| AAEL0150: mitochondrial carrier homolog 2                            | -0.279976784383855  | 0.125164604725619  | 0.530276501925028  | NA                       | NA            | NA                                                                                           | XP_001650362.2mitochondrial carrier homolog 2                                       |
| AAEL0096: zinc finger CCHC domain-containing protein 24              | -0.279961583704856  | 0.190909076938202  | 0.620100715133778  | NA                       | NA            | NA                                                                                           | XP_021706394.1zinc finger CCHC domain-containing protein 24 isoform X1              |
| AAEL0114: switch-associated protein 70                               | -0.279091518586401  | 0.281419613244024  | 0.715107379484722  | NA                       | NA            | XP_019546529.1 PRE                                                                           | XP_021708203.1switch-associated protein 70                                          |
| AAEL0256: NA                                                         | -0.279036225742709  | 0.284812633722551  | 0.71725411692463   | NA                       | NA            | XP_021708404.1uncharacterized protein LOC5575051                                             | XP_021698919.1probable ATP-dependent RNA helicase Dbp73D                            |
| AAEL0274: NA                                                         | -0.278917811347444  | 0.0896769498792188 | 0.45743198048147   | NA                       | NA            | XP_019556937.1 PRE                                                                           | XP_021710795.1protein flightless-1 homolog                                          |
| AAEL0003: protein flightless-1 homolog                               | -0.27884532679572   | 0.477263719777132  | 0.845011493487133  | NA                       | NA            | NA                                                                                           | XP_001662100.1protein hairy                                                         |
| AAEL0276: NA                                                         | -0.278803519725901  | 0.0740534248539931 | 0.418712453878531  | NA                       | NA            | NA                                                                                           | XP_001661917.1venom allergen 5                                                      |
| AAEL0117: venom allergen 5                                           | -0.278659753141922  | 0.0351470274338483 | 0.296718299491993  | NA                       | NA            | KXJ79581.1 hypothe                                                                           | XP_001661917.1venom allergen 5                                                      |
| AAEL0249: NA                                                         | -0.278034946917797  | 0.033130897205423  | 0.285726819198035  | NA                       | aag04130      | NA                                                                                           | XP_021697366.1vesicle-associated membrane protein 2 isoform X1                      |
| AAEL0196: NA                                                         | -0.277873127247756  | 0.0329200325779402 | 0.285244952713941  | NA                       | NA            | XP_021707940.1ras-associated and pleckstrin homology domains-containing protein 1 isoform X2 | XP_021699359.1uncharacterized protein LOC5578871                                    |

|                                                                       |                    |                    |                   |    |                    |                     |                                                                                                       |
|-----------------------------------------------------------------------|--------------------|--------------------|-------------------|----|--------------------|---------------------|-------------------------------------------------------------------------------------------------------|
| AAEL02141 NA                                                          | -0.27249075416292  | 0.150951786440728  | 0.566025396924239 | NA | NA                 | NA                  | XP_021698438.1cubilin homolog                                                                         |
| AAEL02015 NA                                                          | -0.272178495806765 | 0.432385735298632  | 0.820005280371151 | NA | NA                 | NA                  | XP_021704285.1high affinity cGMP-specific 3',5'-cyclic phosphodiesterase 9A-like                      |
| AAEL00869 putative phosphatidate phosphatase                          | -0.272123732387684 | 0.525895930099324  | 0.865680248818465 | NA | NA                 | XP_019559027.1 PRE  | XP_021700319.1putative phosphatidate phosphatase isoform X2                                           |
| AAEL0098E endothelin-converting enzyme homolog                        | -0.271914811233208 | 0.0335407607278831 | 0.288181214022391 | NA | NA                 | NA                  | XP_001654072.2endothelin-converting enzyme homolog isoform X2                                         |
| AAEL01974 NA                                                          | -0.271852280343382 | 0.357775279256397  | 0.773736338358957 | NA | NA                 | NA                  | XP_021708841.1RIMS-binding protein 2 isoform X7                                                       |
| AAEL01327 testicular acid phosphatase homolog                         | -0.271361217279016 | 0.350779894421512  | 0.768176246660341 | NA | NA                 | NA                  | XP_001663437.2testicular acid phosphatase homolog                                                     |
| AAEL01531 cAMP-dependent protein kinase type II regulatory subunit    | -0.271314250842954 | 0.0578123366571146 | 0.37685966690514  | NA | NA                 | NA                  | XP_021697693.1cAMP-dependent protein kinase type II regulatory subunit isoform X7                     |
| AAEL01081 isocitrate dehydrogenase [NAD] subunit gamma, mitochondrial | -0.270808436099673 | 0.0662760799551305 | 0.399131209258581 | NA | aag01100 ; aag     | XP_001655018.1 isoc | XP_001655018.1isocitrate dehydrogenase [NAD] subunit gamma, mitochondrial isoform X1                  |
| AAEL00047 major facilitator superfamily domain-containing protein 6   | -0.2706505777249   | 0.128778303416084  | 0.535353548133802 | NA | NA                 | KFB53186.1 AGAP00   | XP_021705543.1major facilitator superfamily domain-containing protein 6                               |
| AAEL00595 uncharacterized LOC5567268                                  | -0.270468386174243 | 0.440129297512051  | 0.822798752521693 | NA | NA                 | XP_019545874.1 PRE  | XP_019545874.1 putative lysozyme-like protein isoform X1                                              |
| AAEL0085E uncharacterized LOC570687                                   | -0.270416494744145 | 0.184140963063784  | 0.611957279573706 | NA | NA                 | NA                  | XP_021702710.1uncharacterized protein LOC5570687                                                      |
| AAEL00547 uncharacterized LOC5566553                                  | -0.270387527929938 | 0.0894529233175357 | 0.45726184365237  | NA | NA                 | XP_311392.4 AGAP0   | XP_001650930.2uncharacterized protein LOC5566553                                                      |
| AAEL00073 3 beta-hydroxysteroid dehydrogenase/Delta 5-->4-isomerase   | -0.269777291983256 | 0.000774567098831  | 0.798648539435638 | NA | aag01100           | XP_019536475.1 PRE  | XP_001650664.13 beta-hydroxysteroid dehydrogenase/Delta 5--                                           |
| AAEL01311 rho guanine nucleotide exchange factor 11                   | -0.269371848314864 | 0.050171541202787  | 0.356468207181388 | NA | NA                 | NA                  | XP_021709518.1rho guanine nucleotide exchange factor 11 isoform X5                                    |
| AAEL01047 NA                                                          | -0.269294545522929 | 0.245920734300402  | 0.679727114240672 | NA | NA                 | NA                  | XP_021709939.1membrane-associated guanylate kinase, WW and PDZ domain-containing protein 1 isoform X1 |
| AAEL02797 NA                                                          | -0.268994931931338 | 0.35346860599527   | 0.770323402046695 | NA | NA                 | NA                  | XP_021695163.1protein peste                                                                           |
| AAEL0092E uncharacterized LOC5571728                                  | -0.268945330600346 | 0.391938282947822  | 0.793285976044306 | NA | NA                 | NA                  | XP_021700724.1uncharacterized protein LOC5571728                                                      |
| AAEL0224E NA                                                          | -0.268802925520933 | 0.11526013844798   | 0.511637141340239 | NA | NA                 | NA                  | NA                                                                                                    |
| AAEL01327 carcinine transporter                                       | -0.26879888583373  | 0.167604297345919  | 0.587554508928878 | NA | NA                 | NA                  | XP_021701957.1carcinine transporter                                                                   |
| AAEL01047 nucleotide exchange factor SIL1                             | -0.268702161725089 | 0.188090263073248  | 0.615069865245212 | NA | aag04141           | NA                  | XP_021693611.1nucleotide exchange factor SIL1                                                         |
| AAEL0221E NA                                                          | -0.268538658090603 | 0.17331560227242   | 0.596392068481585 | NA | NA                 | NA                  | NA                                                                                                    |
| AAEL0063E uncharacterized LOC567907                                   | -0.268314517331423 | 0.0287711203541712 | 0.274601260220884 | NA | NA                 | KUJ68524.1 hypothei | XP_019543339.1 asporin-like                                                                           |
| AAEL0242E NA                                                          | -0.268209623343959 | 0.193393218381579  | 0.624628157151667 | NA | NA                 | NA                  | XP_021698282.1uncharacterized protein LOC110676084                                                    |
| AAEL0148E zinc finger protein 26                                      | -0.268157919960125 | 0.365675546716731  | 0.77982534898896  | NA | NA                 | NA                  | XP_021697489.1zinc finger protein 26 isoform X1                                                       |
| AAEL00341 ATPase inhibitor mai-2, mitochondrial                       | -0.268093638059009 | 0.0601611024728507 | 0.38417936499318  | NA | NA                 | KUJ77258.1 hypothei | XP_001656815.1ATPase inhibitor mai-2, mitochondrial                                                   |
| AAEL0075E uncharacterized LOC5569297                                  | -0.267997288376558 | 0.205813376446706  | 0.63802392788659  | NA | NA                 | KUJ76579.1 hypothei | XP_001658423.1uncharacterized protein LOC5569297                                                      |
| AAEL00207 myosin-2 heavy chain                                        | -0.2677822945358   | 0.038805958969581  | 0.31084338200184  | NA | NA                 | XP_019549849.1 PRÉ  | XP_021702057.1myosin-2 heavy chain isoform X1                                                         |
| AAEL0224E NA                                                          | -0.267530038595511 | 0.483414692555144  | 0.847379421005006 | NA | NA                 | NA                  | XP_019535160.1 zinc finger protein 260-like                                                           |
| AAEL01717 cytochrome P450 4c21                                        | -0.266804257416264 | 0.0751289213223871 | 0.42001171015769  | NA | NA                 | NA                  | XP_021706633.1cytochrome P450 4c21                                                                    |
| AAEL02337 NA                                                          | -0.266678342816786 | 0.311327768677966  | 0.743341496464619 | NA | 230 aag01100 ; aag | NA                  | XP_021696188.1 guanylate cyclase soluble subunit beta-1                                               |
| AAEL0225E NA                                                          | -0.266388211925588 | 0.363175814730088  | 0.778250660803901 | NA | aag04711           | NA                  | XP_021695531.1circadian locomoter output cycles protein kaput                                         |
| AAEL0139E tumor necrosis factor alpha-induced protein 8-like protein  | -0.266093414700911 | 0.1633157788931741 | 0.581366301644056 | NA | NA                 | NA                  | XP_021710539.1tumor necrosis factor alpha-induced protein 8-like protein isoform X1                   |
| AAEL0235E NA                                                          | -0.266089492325094 | 0.485882653679454  | 0.847790841886424 | NA | NA                 | NA                  | XP_021705111.1uncharacterized protein LOC5563928 isoform X1                                           |
| AAEL0091E beclin-1-like protein B                                     | -0.265830973090022 | 0.399839736064184  | 0.798648539435638 | NA | NA                 | XP_001689003.1 AG   | XP_001659776.1beclin-1-like protein B                                                                 |
| AAEL0137E trypsin-1                                                   | -0.265804813157149 | 0.0430813961351596 | 0.327632237384908 | NA | NA                 | NA                  | XP_019529704.1 trypsin-4-like                                                                         |
| AAEL0005E juvenile hormone esterase                                   | -0.265748518475442 | 0.134840182350858  | 0.543019412688227 | NA | NA                 | KUJ69215.1 hypothei | XP_021709265.1juvenile hormone esterase                                                               |
| AAEL0131E deoxynucleotidyltransferase terminal-interacting protein 2  | -0.265578657887627 | 0.0567507302033914 | 0.374465659921115 | NA | NA                 | NA                  | XP_001663357.2deoxynucleotidyltransferase terminal-interacting protein 2                              |
| AAEL0101E septin-4                                                    | -0.265578201763811 | 0.131623132072049  | 0.538981683630591 | NA | aag04215           | KUJ71255.1 hypothei | XP_019552179.1 septin-4                                                                               |
| AAEL0088E sulfotransferase 1 family member D1                         | -0.26510028490381  | 0.120316531809095  | 0.521361270092351 | NA | NA                 | KUJ77087.1 hypothei | XP_001659587.1sulfotransferase 1 family member D1                                                     |
| AAEL0006E condensin complex subunit 1                                 | -0.264745437957753 | 0.17236406313555   | 0.594934024371093 | NA | NA                 | KUJ81410.1 hypothei | XP_001649509.2condensin complex subunit 1 isoform X1                                                  |
| AAEL0131E beta-lactamase-like protein 2 homolog                       | -0.264719111297163 | 0.138900161782754  | 0.549029662748535 | NA | NA                 | NA                  | XP_001656361.1beta-lactamase-like protein 2 homolog                                                   |
| AAEL0215E NA                                                          | -0.26427692656617  | 0.198470519843231  | 0.631728026149226 | NA | NA                 | NA                  | XP_021712414.1 protein borderless                                                                     |
| AAEL0102E MAGUK p55 subfamily member 7                                | -0.263889918179848 | 0.081000053473289  | 0.433079891352508 | NA | 230 NA             | NA                  | XP_021701809.1MAGUK p55 subfamily member 7 isoform X1                                                 |
| AAEL0181E NA                                                          | -0.263811969450599 | 0.364995788118206  | 0.779097945317497 | NA | NA                 | NA                  | XP_021706615.1zinc finger protein 135 isoform X3                                                      |
| AAEL0077E proclotting enzyme                                          | -0.263733024470622 | 0.0438767730439264 | 0.331489305803096 | NA | NA                 | KUJ71653.1 hypothei | XP_001652921.1proclotting enzyme isoform X3                                                           |
| AAEL0181E NA                                                          | -0.263708750422588 | 0.0614908077513875 | 0.38668618011863  | NA | NA                 | NA                  | XP_021700900.1uncharacterized protein LOC55565763                                                     |
| AAEL0109E paramyosin, long form                                       | -0.263705590727772 | 0.0321281268039762 | 0.284442054201394 | NA | NA                 | KUJ80479.1 hypothei | XP_001655070.1paramyosin, long form isoform X1                                                        |
| AAEL0247E NA                                                          | -0.263641409978028 | 0.44124844416357   | 0.82360333814237  | NA | NA                 | NA                  | NA                                                                                                    |
| AAEL0227E NA                                                          | -0.263576306516597 | 0.366163250133111  | 0.78032288738418  | NA | NA                 | NA                  | XP_021710962.1uncharacterized protein LOC5571100 isoform X1                                           |
| AAEL0181E NA                                                          | -0.263179824252639 | 0.376750151975734  | 0.783277809573714 | NA | NA                 | NA                  | XP_001658411.2delta(9)-fatty-acid desaturase fat-7                                                    |
| AAEL0203E NA                                                          | -0.262957926228694 | 0.308555409433529  | 0.74133861034134  | NA | NA                 | NA                  | XP_021706974.1uncharacterized family 31 glucosidase KIAA1161-like                                     |
| AAEL0037E ecocyst complex component 6                                 | -0.262885070321252 | 0.165690299271398  | 0.584439853413553 | NA | NA                 | KUJ78922.1 hypothei | XP_001664059.2ecocyst complex component 6                                                             |
| AAEL0009E DNA replication licensing factor Mcm7                       | -0.262625665984023 | 0.143056461143593  | 0.555375365647863 | NA | aag03030           | ETN58769.1 DNA rep  | XP_001657714.1DNA replication licensing factor Mcm7                                                   |
| AAEL00241 monocarboxylate transporter 12                              | -0.262493857886977 | 0.105646589507151  | 0.490349840297262 | NA | NA                 | KUJ81300.1 hypothei | XP_001655208.2monocarboxylate transporter 12                                                          |
| AAEL0067E uncharacterized LOC5568272                                  | -0.26231533978985  | 0.180343525462823  | 0.605728027054765 | NA | NA                 | XP_320618.4 AGAP0   | XP_001657969.2uncharacterized protein LOC5568272                                                      |
| AAEL0006E inactive hydroxysteroid dehydrogenase-like protein 1        | -0.262084441554024 | 0.382988339077251  | 0.788887121770344 | NA | NA                 | KUJ73517.1 hypothei | XP_021703814.1inactive hydroxysteroid dehydrogenase-like protein 1                                    |
| AAEL0173E elongation factor 1-alpha                                   | -0.261901751991801 | 0.051143           |                   |    |                    |                     |                                                                                                       |

|                                                                       |                     |                    |                   |                         |                |                      |                                                                                                 |
|-----------------------------------------------------------------------|---------------------|--------------------|-------------------|-------------------------|----------------|----------------------|-------------------------------------------------------------------------------------------------|
| AAEL0130c uncharacterized LOC5577104                                  | -0.258294969378017  | 0.477859757254607  | 0.845011493487133 | NA                      | NA             | NA                   | XP_021701926.1uncharacterized protein LOC5577104 isoform X2                                     |
| AAEL0198f NA                                                          | -0.258168053279102  | 0.22860485366436   | 0.662349453217709 | NA                      | NA             | NA                   | XP_021704263.1sex peptide receptor                                                              |
| AAEL0121t acetylcholine receptor subunit alpha-like                   | -0.25815415396657   | 0.435291827011189  | 0.82096020424486  | NA                      | NA             | NA                   | XP_001655864.2acetylcholine receptor subunit alpha-like isoform X3                              |
| AAEL0183c NA                                                          | -0.258131456788907  | 0.0460993725412965 | 0.341281972315984 | NA                      | NA             | NA                   | XP_021710304.1ABC transporter G family member 23 isoform X3                                     |
| AAEL0068f putative epidermal cell surface receptor                    | -0.2579497011147075 | 0.10628442001054   | 0.490844601505817 | NA                      | NA             | KXJ68906.1 hypothei  | XP_021705509.1putative epidermal cell surface receptor                                          |
| AAEL0079f NA                                                          | -0.257883562884375  | 0.0981159437342988 | 0.473943787004209 | NA                      | aag04933 ; aag | ETN60200.1 collagen  | XP_021701997.1collagen alpha-1(IV) chain                                                        |
| AAEL0101f cytochrome P450 4d2                                         | -0.257715118591435  | 0.614560691519534  | 0.896794716676617 | NA                      | NA             | NA                   | XP_001660657.2cytochrome P450 4d2                                                               |
| AAEL0175f glycine-rich cell wall structural protein 1.0               | -0.257641169879024  | 0.0518927624874947 | 0.361717594818022 | NA                      | NA             | NA                   | XP_011493477.2glycine-rich cell wall structural protein 1.0                                     |
| AAEL0198f NA                                                          | -0.257381488268433  | 0.0458848892563798 | 0.340510283013877 | 04660 ; 04658           | aag03015       | NA                   | XP_021709141.1serine/threonine-protein phosphatase PP1-beta catalytic subunit isoform X1        |
| AAEL0068f cytochrome P450 4g15                                        | -0.25733829951123   | 0.108573982087548  | 0.495725018486141 | NA                      | NA             | KXJ83027.1 hypothei  | XP_001658068.2cytochrome P450 4g15                                                              |
| AAEL0137f histone H4                                                  | -0.257303342104287  | 0.229050564897558  | 0.66245890682856  | NA                      | NA             | NA                   | XP_001865168.1histone 1                                                                         |
| AAEL0025f sodium-coupled monocarboxylate transporter 1                | -0.257215338706925  | 0.0662071030288235 | 0.399054441537196 | NA                      | NA             | XP_019556115.1 PRE   | XP_021713420.1sodium-coupled monocarboxylate transporter 1 isoform X2                           |
| AAEL0220f NA                                                          | -0.256963147949726  | 0.31083334637852   | 0.742918550320373 | NA                      | NA             | NA                   | NA                                                                                              |
| AAEL0096f group 3 secretory phospholipase A2                          | -0.25641750441614   | 0.0997053839033349 | 0.479106497482239 | 00564 ; 00591 ; 00565 ; | aag01100 ; aag | NA                   | XP_001653934.2group 3 secretory phospholipase A2 isoform X2                                     |
| AAEL0044f zinc finger protein 25                                      | -0.256392651227173  | 0.0567253060695857 | 0.374465659921115 | NA                      | NA             | XP_019555254.1 PRE   | XP_021710833.1zinc finger protein 12 isoform X2                                                 |
| AAEL0042f cytochrome b5-related protein                               | -0.256358066530238  | 0.0467941504058447 | 0.345031868617454 | NA                      | NA             | KFB49249.1 AGAP01    | XP_001648852.1cytochrome b5-related protein                                                     |
| AAEL0031f atlastin                                                    | -0.256091695667971  | 0.0225251637652849 | 0.259075173517489 | NA                      | NA             | KXJ76608.1 hypothei  | XP_019528497.1 atlastin                                                                         |
| AAEL0153v uncharacterized LOC5570300                                  | -0.255768567239846  | 0.401120341677579  | 0.798934968584928 | NA                      | NA             | NA                   | KFB49214.1AGAP009795-like protein                                                               |
| AAEL0100f abscission/NoCut checkpoint regulator                       | -0.25575028928289   | 0.315917373882168  | 0.745684464362801 | NA                      | NA             | NA                   | XP_001654174.2abscission/NoCut checkpoint regulator isoform X1                                  |
| AAEL0215f NA                                                          | -0.25563393556957   | 0.239682112723913  | 0.674660318489854 | NA                      | NA             | NA                   | XP_021700143.1E3 ubiquitin-protein ligase TRIM37 isoform X4                                     |
| AAEL0000f CD109 antigen                                               | -0.255603449710381  | 0.0513376818883808 | 0.359690131564899 | NA                      | NA             | XP_019545531.1 PRE   | XP_001647863.2CD109 antigen                                                                     |
| AAEL0122f myosin light chain alkali                                   | -0.255423959021579  | 0.0866360416063992 | 0.448635258785642 | NA                      | NA             | KXJ74141.1 hypothei  | XP_001655930.1myosin light chain alkali isoform X2                                              |
| AAEL0008f golgin subfamily A member 2                                 | -0.25519206943056   | 0.118036755953526  | 0.515958562099766 | NA                      | NA             | KXJ76790.1 hypothei  | XP_021704283.1golgin subfamily A member 2                                                       |
| AAEL0112f vitamin K epoxide reductase complex subunit 1               | -0.255063938729868  | 0.245324608312464  | 0.679727114240672 | NA                      | aag01100 ; aag | XP_019545284.1 PRE   | XP_001661572.1vitamin K epoxide reductase complex subunit 1                                     |
| AAEL0199f NA                                                          | -0.254980848921877  | 0.213460679989909  | 0.64656523806829  | NA                      | NA             | NA                   | XP_021706181.1squamous cell carcinoma antigen recognized by T-cells 3                           |
| AAEL0097f mite group 2 allergen Lep d 2                               | -0.254962560781308  | 0.285877280643372  | 0.717970179170389 | NA                      | NA             | NA                   | XP_001660331.1mite group 2 allergen Lep d 2                                                     |
| AAEL0055f zinc finger protein 62                                      | -0.25487544402675   | 0.456040437350042  | 0.832617462606238 | NA                      | NA             | XP_019536253.1 PRE   | XP_001651114.2zinc finger protein 62                                                            |
| AAEL0065f PXMP2/4 family protein 3                                    | -0.254872428149133  | 0.0299079517855609 | 0.279120661593034 | NA                      | aag04146       | KFB44974.1 AGAP00    | XP_001652038.1PXMP2/4 family protein 3                                                          |
| AAEL0290f NA                                                          | -0.254674771585511  | 0.193828387586564  | 0.624986606780741 | NA                      | NA             | NA                   | XP_001651700.1mediator of RNA polymerase II transcription subunit 22 isoform X2                 |
| AAEL0198f NA                                                          | -0.254503499723068  | 0.0273741207977961 | 0.269120362800555 | NA                      | NA             | NA                   | XP_019533023.1 splicing factor, proline- and glutamine-rich-like                                |
| AAEL0002f uncharacterized LOC5572032                                  | -0.254457465425158  | 0.281307145592622  | 0.715107379448722 | NA                      | NA             | KXJ78228.1 hypothei  | XP_001660139.1uncharacterized protein LOC5572032                                                |
| AAEL0091f protein encore                                              | -0.254394610504963  | 0.118852720438202  | 0.517352286410753 | NA                      | aag04320       | NA                   | XP_021697323.1protein encore isoform X3                                                         |
| AAEL0197f NA                                                          | -0.254392233724271  | 0.103858953711526  | 0.486414446815465 | NA                      | aag03013       | NA                   | XP_021701100.1translation initiation factor eIF-2B subunit epsilon                              |
| AAEL0107f zinc carboxypeptidase A 1                                   | -0.254304794970347  | 0.0756441484530262 | 0.420590606685648 | NA                      | NA             | KXJ79113.1 hypothei  | XP_001654889.1zinc carboxypeptidase A 1                                                         |
| AAEL0217f NA                                                          | -0.254202385209256  | 0.270365220603207  | 0.706188123755524 | NA                      | NA             | NA                   | XP_021707175.1protein charlatan isoform X1                                                      |
| AAEL0069f leucine-rich repeat-containing G-protein coupled receptor 6 | -0.254189418161882  | 0.216054941266766  | 0.649293784956494 | NA                      | NA             | KXJ79334.1 hypothei  | XP_001652334.1leucine-rich repeat-containing G-protein coupled receptor 6                       |
| AAEL0071f probable leucine--tRNA ligase, mitochondrial                | -0.254102237889689  | 0.154018005740762  | 0.570102046877109 | 970                     | aag00970       | KXJ76256.1 hypothei  | XP_001658155.1probable leucine--tRNA ligase, mitochondrial isoform X2                           |
| AAEL0035f ribonuclease H2 subunit A                                   | -0.254089114406687  | 0.367660650772947  | 0.781160914070875 | NA                      | aag03030       | KXJ80504.1 hypothei  | XP_001656938.1ribonuclease H2 subunit A                                                         |
| AAEL0095f proton-coupled folate transporter                           | -0.253568705188401  | 0.0788136108461547 | 0.429137779293678 | NA                      | NA             | NA                   | XP_001660178.2proton-coupled folate transporter isoform X1                                      |
| AAEL0257f NA                                                          | -0.253332147435044  | 0.272397948577441  | 0.707756103918734 | 00513 ; 00510           | aag01100 ; aag | NA                   | XP_021693315.1alpha-1,6-mannosyl-glycoprotein 2-beta-N-acetylglucosaminyltransferase isoform X1 |
| AAEL0080f serine/threonine-protein kinase Doa                         | -0.253211101047192  | 0.0657115509768498 | 0.398076163323879 | NA                      | NA             | NA                   | XP_021683360.1serine/threonine-protein kinase Doa isoform X10                                   |
| AAEL0069f NA                                                          | -0.252670520432013  | 0.315190019102763  | 0.745618464895825 | NA                      | NA             | ETN62709.1 structur. | XP_001652359.1structural maintenance of chromosomes protein 3                                   |
| AAEL0048f superoxide dismutase [Mn], mitochondrial-like               | -0.252556909702549  | 0.120890256481712  | 0.522930064976407 | NA                      | NA             | XP_001649850.1 sup   | XP_001649850.1superoxide dismutase [Mn], mitochondrial                                          |
| AAEL0010f SET and MYND domain-containing protein 4                    | -0.252546836219584  | 0.383152809482683  | 0.788887121770344 | NA                      | NA             | KXJ69386.1 hypothei  | XP_001657892.1SET and MYND domain-containing protein 4                                          |
| AAEL0024f trimeric intracellular cation channel type 1B.1             | -0.252511191538835  | 0.0387836260882799 | 0.310433820010184 | NA                      | NA             | ETN64982.1 transme   | XP_001655265.1trimeric intracellular cation channel type 1B.1                                   |
| AAEL0083f mitogen-activated protein kinase kinase 15                  | -0.252223322105287  | 0.134630895784509  | 0.542662316284181 | NA                      | aag04141 ; aag | NA                   | XP_021698715.1mitogen-activated protein kinase kinase kinase 15 isoform X2                      |
| AAEL0089f probable cation-transporting ATPase 13A3                    | -0.252140574041623  | 0.0633922174521344 | 0.393083008756429 | NA                      | NA             | XP_001865950.1 cati  | XP_001659588.2probable cation-transporting ATPase 13A3                                          |
| AAEL0117f NA                                                          | -0.251979931884642  | 0.036815834173273  | 0.303201029751424 | NA                      | aag01100 ; aag | KXJ73427.1 hypothei  | XP_021706303.1glutathione S-transferase 1                                                       |
| AAEL0029f endochitinase                                               | -0.251942176466226  | 0.0362171176729886 | 0.300966157937731 | NA                      | NA             | KXJ80791.1 hypothei  | XP_019932989.1 endochitinase-like                                                               |
| AAEL0140f allantoicase                                                | -0.251930277961188  | 0.107364791765405  | 0.492585616254939 | 230                     | aag01100 ; aag | NA                   | XP_019528471.1 allantoicase-like                                                                |
| AAEL0018f cytochrome P450 9e2                                         | -0.251600076951852  | 0.112508395267514  | 0.503547757511443 | NA                      | NA             | KXJ78124.1 hypothei  | XP_021702449.1cytochrome P450 9e2                                                               |
| AAEL0277f NA                                                          | -0.251513789579216  | 0.145884855450712  | 0.559813361074833 | NA                      | NA             | NA                   | XP_021704545.1receptor-mediated endocytosis protein 6 homolog                                   |
| AAEL0077f uncharacterized LOC5569630                                  | -0.251321086973546  | 0.0590410778025901 | 0.381093648037575 | NA                      | NA             | KXJ76604.1 hypothei  | ABF18065.1putative 30.5 kDa secreted protein second family member                               |
| AAEL0092f protein melted                                              | -0.251060053091467  | 0.18721067593856   | 0.614196367514984 | NA                      | NA             | NA                   | XP_021696476.1protein melted                                                                    |
| AAEL0262f NA                                                          | -0.251040875319059  | 0.566360854086983  | 0.880302387766415 | NA                      | NA             | NA                   | XP_021694833.1XK-related protein 6                                                              |
| AAEL0187f NA                                                          | -0.250954242509369  | 0.120152532482375  | 0.521284113108352 | NA                      | NA             | NA                   | XP_001660834.1ankyrin repeat domain-containing protein 13B isoform X2                           |
| AAEL0032f deoxyribose-phosphate aldolase                              | -0.2508             |                    |                   |                         |                |                      |                                                                                                 |

|           |                                                                           |                    |                    |                    |                         |                |                |                                      |                 |                                                                               |
|-----------|---------------------------------------------------------------------------|--------------------|--------------------|--------------------|-------------------------|----------------|----------------|--------------------------------------|-----------------|-------------------------------------------------------------------------------|
| AAEL0089f | sentrin-specific protease 1                                               | -0.247847338318254 | 0.111135646262679  | 0.502540647129813  | NA                      | NA             | XP_001862733.1 | sen                                  | XP_001653624.2  | sentrin-specific protease 1                                                   |
| AAEL0171f | lysozyme c-1                                                              | -0.247523254231769 | 0.066778186784694  | 0.399540230684495  | NA                      | NA             | NA             | NA                                   | XP_021696190.1  | lysozyme c-1 isoform X1                                                       |
| AAEL0049f | NA                                                                        | -0.247518443406139 | 0.312548060121705  | 0.744018629406202  | NA                      | NA             | XP_019535832.1 | PRE                                  | XP_001650036.2  | lipase 1                                                                      |
| AAEL0097f | BTB/POZ domain-containing protein 3                                       | -0.247206077803404 | 0.321978826520718  | 0.746650319748046  | NA                      | NA             | NA             | NA                                   | XP_001660335.1  | BTB/POZ domain-containing protein 3                                           |
| AAEL0099f | uncharacterized LOC5572622                                                | -0.246870570863277 | 0.207811433237909  | 0.639832374753494  | NA                      | NA             | NA             | NA                                   | KFB36307.1      | AGAP008322-like protein                                                       |
| AAEL0029f | phosphatidylinositol 4,5-bisphosphate 3-kinase catalytic subunit beta iso | -0.246743272009987 | 0.216299580710086  | 0.645932737910022  | 05170 ; 05163 ; 00562 ; | aag01100 ; aag | XP_001847784.1 | phc                                  | XP_021700427.1  | phosphatidylinositol 4,5-bisphosphate 3-kinase catalytic subunit beta isoform |
| AAEL0093f | 1-phosphatidylinositol 4,5-bisphosphate phosphodiesterase                 | -0.246694718231808 | 0.0818267576048699 | 0.435494403400817  | 00562 ; 04070           | aag01100 ; aag | NA             | NA                                   | XP_001653804.11 | phosphatidylinositol 4,5-bisphosphate phosphodiesterase isoform X2            |
| AAEL0274f | NA                                                                        | -0.246604464300184 | 0.207799096032925  | 0.639832374753494  | NA                      | NA             | NA             | NA                                   | XP_021709176.1  | transient receptor potential channel pyrexia-like                             |
| AAEL0154f | serine protease easter                                                    | -0.246400630852407 | 0.0652083186720943 | 0.39730198438886   | NA                      | NA             | NA             | NA                                   | XP_001652078.2  | serine protease easter                                                        |
| AAEL0017f | THO complex subunit 2                                                     | -0.246285415835594 | 0.0978813946302756 | 0.473599304703091  | NA                      | aag03013 ;     | KXJ80145.1     | hypothei                             | XP_001653823.1  | THO complex subunit 2                                                         |
| AAEL0069f | Golgi SNAP receptor complex member 1                                      | -0.245833191612414 | 0.327771678978179  | 0.7506060774006273 | NA                      | aag04130       | ETN60415.1     | golgi fan                            | XP_001652356.1  | Golgi SNAP receptor complex member 1                                          |
| AAEL0272f | NA                                                                        | -0.245618232572843 | 0.419225625099294  | 0.813348977896628  | NA                      | NA             | NA             | NA                                   | NA              | NA                                                                            |
| AAEL0182f | NA                                                                        | -0.245592866312508 | 0.479654820436238  | 0.845454613425911  | NA                      | aag04013       | NA             | NA                                   | XP_021708908.1  | mitogen-activated protein kinase kinase kinase 11 isoform X1                  |
| AAEL0070f | ubiquitin carboxyl-terminal hydrolase calypso                             | -0.245347918165037 | 0.443457657002201  | 0.82545872799161   | NA                      | NA             | KXJ68377.1     | hypothei                             | XP_001651006.2  | ubiquitin carboxyl-terminal hydrolase calypso                                 |
| AAEL0093f | leucine-rich repeats and immunoglobulin-like domains protein sma-10       | -0.245036616835023 | 0.164731664063034  | 0.583247700156998  | NA                      | NA             | NA             | NA                                   | XP_001659998.1  | leucine-rich repeats and immunoglobulin-like domains protein sma-10           |
| AAEL0053f | voltage-dependent calcium channel subunit alpha-2/delta-3                 | -0.24497068851894  | 0.0672938585058113 | 0.4007529665455    | NA                      | NA             | XP_019529000.1 | PRE                                  | XP_021700557.1  | voltage-dependent calcium channel subunit alpha-2/delta-3 isoform X1          |
| AAEL0024f | uncharacterized LOC5580145                                                | -0.24474445947042  | 0.131982382499409  | 0.538981683630591  | NA                      | NA             | KXJ73801.1     | hypothei                             | XP_001655285.2  | uncharacterized protein LOC5580145                                            |
| AAEL0063f | STAM-binding protein                                                      | -0.244700969078125 | 0.312036506673709  | 0.743490640759055  | NA                      | aag04144       | XP_001844659.1 | am                                   | XP_021699581.1  | STAM-binding protein                                                          |
| AAEL0195f | NA                                                                        | -0.244677748090405 | 0.0818079002634391 | 0.435494403400817  | NA                      | NA             | NA             | NA                                   | XP_021708402.1  | uncharacterized protein LOC5576866 isoform X3                                 |
| AAEL0269f | NA                                                                        | -0.24464125487525  | 0.251402887223283  | 0.684238204149262  | 480                     | aag01100 ; aag | NA             | NA                                   | XP_021712943.1  | aminopeptidase N                                                              |
| AAEL0086f | disks large-associated protein 1                                          | -0.244416346074881 | 0.0396201870123403 | 0.31353264954028   | NA                      | NA             | KXJ78102.1     | hypothei                             | XP_021701494.1  | serine-rich adhesin for platelets isoform X1                                  |
| AAEL0007f | zinc finger HIT domain-containing protein 3                               | -0.244352503070331 | 0.477117589310613  | 0.845011493487133  | NA                      | NA             | ETN65251.1     | hypothe                              | XP_001650999.1  | zinc finger HIT domain-containing protein 3                                   |
| AAEL0274f | NA                                                                        | -0.244063911703957 | 0.536458487414508  | 0.868144476914536  | NA                      | NA             | NA             | NA                                   | XP_001653279.1  | isochorismatase domain-containing protein 1                                   |
| AAEL0102f | protein daughterless                                                      | -0.243623933678226 | 0.316961657035887  | 0.745684464362801  | NA                      | NA             | NA             | NA                                   | XP_021702880.1  | protein daughterless isoform X3                                               |
| AAEL0028f | protein patched                                                           | -0.24294944809735  | 0.21293494083731   | 0.646249117936982  | NA                      | aag04341       | KXJ74359.1     | hypothei                             | XP_001656017.2  | protein patched                                                               |
| AAEL0090f | zinc finger protein swm                                                   | -0.242754848977174 | 0.197478622800282  | 0.630533756768978  | NA                      | NA             | KXJ1077.1      | hypothei                             | XP_021700745.1  | zinc finger protein swm                                                       |
| AAEL0064f | alpha, alpha-trehalose-phosphate synthase [UDP-forming]                   | -0.242643397447602 | 0.118308224076643  | 0.516203071575757  | 500                     | aag01100 ; aag | KFB45146.1     | AGAP00                               | XP_001657813.1  | alpha, alpha-trehalose-phosphate synthase [UDP-forming]                       |
| AAEL0019f | DNA N6-methyl adenine demethylase                                         | -0.242510936747033 | 0.164602756075585  | 0.583247700156998  | NA                      | NA             | XP_019552818.1 | PRE                                  | XP_021699256.1  | DNA N6-methyl adenine demethylase isoform X1                                  |
| AAEL0108f | rabankyrin-5                                                              | -0.242304417261665 | 0.141428409397364  | 0.552330595273689  | NA                      | NA             | XP_019531081.1 | PRE                                  | XP_019531082.1  | rabankyrin-5-like isoform X2                                                  |
| AAEL0172f | protein argonaute-2                                                       | -0.242173993902004 | 0.0433432101242082 | 0.328808095270374  | NA                      | NA             | NA             | NA                                   | XP_011493002.2  | protein argonaute-2                                                           |
| AAEL0069f | uncharacterized LOC5568491                                                | -0.241901067368562 | 0.0572874224058685 | 0.375202036283845  | NA                      | NA             | KXJ77639.1     | hypothei                             | XP_001658082.1  | uncharacterized protein LOC5568491 isoform X1                                 |
| AAEL0258f | NA                                                                        | -0.241777026774544 | 0.251114782839715  | 0.68385860596939   | NA                      | NA             | NA             | NA                                   | XP_021711994.1  | uncharacterized protein LOC110680504                                          |
| AAEL0011f | ATP-binding cassette sub-family F member 1                                | -0.241375933989915 | 0.0324449941515021 | 0.28463170766102   | NA                      | NA             | XP_001847128.1 | ATF                                  | XP_001652415.2  | ATP-binding cassette sub-family F member 1                                    |
| AAEL0245f | NA                                                                        | -0.241374007618053 | 0.0554639097521192 | 0.37071620419176   | NA                      | NA             | NA             | NA                                   | XP_021699215.1  | ibromodomain-containing protein 4 isoform X2                                  |
| AAEL0081f | fatty acid synthase                                                       | -0.241303025101858 | 0.0807572135623234 | 0.433079891352508  | 00780 ; 00061           | aag01100 ; aag | KXJ74732.1     | hypothei                             | XP_001659008.2  | faty acid synthase                                                            |
| AAEL0093f | N-alpha-acetyltransferase 20                                              | -0.241180903708606 | 0.197549859531371  | 0.630542423658575  | NA                      | NA             | XP_001653814.1 | n                                    | XP_001653814.1  | N-alpha-acetyltransferase 20                                                  |
| AAEL0068f | proteoglycan 4                                                            | -0.240821980339583 | 0.5474094137433    | 0.87195108624993   | NA                      | NA             | KXJ75568.1     | hypothei                             | XP_021695998.1  | proteoglycan 4 isoform X2                                                     |
| AAEL0007f | NF-kappa-B inhibitor cactus                                               | -0.240748416593326 | 0.0483962092578902 | 0.35027523096122   | NA                      | aag04624       | KXJ73211.1     | hypothei                             | XP_001650267.3  | NF-kappa-B inhibitor cactus isoform X1                                        |
| AAEL0142f | protein CBF42T2                                                           | -0.240740412378656 | 0.492189737074656  | 0.852141102645529  | NA                      | NA             | NA             | NA                                   | XP_021710919.1  | protein CBF42T2 isoform X1                                                    |
| AAEL0030f | chitinase-3-like protein 1                                                | -0.24062093754724  | 0.122267797345058  | 0.524358469899517  | 520                     | NA             | XP_019543589.1 | PRE                                  | XP_001663097.2  | chitinase-3-like protein 1                                                    |
| AAEL0119f | E3 ubiquitin-protein ligase mind-bomb                                     | -0.240483845824086 | 0.0601049083255746 | 0.38408706000829   | NA                      | NA             | XP_019527699.1 | PRE                                  | XP_001662068.2  | E3 ubiquitin-protein ligase mind-bomb isoform X1                              |
| AAEL0036f | uncharacterized LOC5578631                                                | -0.240341414118456 | 0.160959223073279  | 0.578121300046961  | NA                      | NA             | NA             | NA                                   | AAL76018.1      | putative 34 kDa secreted protein                                              |
| AAEL0182f | NA                                                                        | -0.240340016829073 | 0.276612906135313  | 0.711897116008604  | NA                      | NA             | NA             | NA                                   | XP_021706007.1  | uncharacterized protein LOC5573983                                            |
| AAEL0067f | leishmanolysin-like peptidase                                             | -0.240127725293321 | 0.260856785050358  | 0.694041487911236  | NA                      | NA             | XP_019525156.1 | PRE                                  | XP_001657977.2  | leishmanolysin-like peptidase                                                 |
| AAEL0274f | NA                                                                        | -0.23994650709831  | 0.576569029310067  | 0.881961491587822  | NA                      | NA             | XP_021708274.1 | uncharacterized protein LOC110678927 | XP_021708274.1  | uncharacterized protein LOC110678927                                          |
| AAEL0135f | elongation of very long chain fatty acids protein AAEL008004-like         | -0.23983557723767  | 0.0990797913846106 | 0.477596773347924  | 62                      | NA             | NA             | NA                                   | XP_001663734.2  | elongation of very long chain fatty acids protein AAEL008004-like             |
| AAEL0018f | NADH dehydrogenase [ubiquinone] 1 beta subcomplex subunit 10              | -0.239823125742012 | 0.0702371814826732 | 0.407517366963152  | NA                      | aag01100 ; aag | XP_001654150.1 | NAI                                  | XP_001654150.1  | NADH dehydrogenase [ubiquinone] 1 beta subcomplex subunit 10                  |
| AAEL0127f | serine protease Hayan                                                     | -0.239743019292824 | 0.330309359945554  | 0.753845915232883  | NA                      | NA             | XP_019531205.1 | PRE                                  | XP_001662880.2  | serine protease Hayan                                                         |
| AAEL0021f | interferon-related developmental regulator 2                              | -0.239638125811481 | 0.106192402171521  | 0.490844601505817  | NA                      | NA             | KXJ71629.1     | hypothei                             | XP_001654817.1  | interferon-related developmental regulator 2                                  |
| AAEL0134f | NA                                                                        | -0.239542127248687 | 0.215630353217411  | 0.648302652610268  | NA                      | aag03010       | NA             | NA                                   | XP_021699379.1  | 339S ribosomal protein L16, mitochondrial                                     |
| AAEL0067f | transmembrane protein 14 homolog                                          | -0.239375123701209 | 0.211299134989702  | 0.643040565246605  | NA                      | NA             | ETN61392.1     | membra                               | XP_001658052.2  | transmembrane protein 14 homolog                                              |
| AAEL0095f | zinc finger E-box-binding homeobox 1                                      | -0.239367393055968 | 0.38234289366077   | 0.788330564085871  | NA                      | NA             | NA             | NA                                   | XP_001660167.1  | zinc finger E-box-binding homeobox 1                                          |
| AAEL0088f | cell growth-regulating nucleolar protein                                  |                    |                    |                    |                         |                |                |                                      |                 |                                                                               |

|                                                                                 |                      |                    |                   |                         |                |                                                   |                                                                                      |
|---------------------------------------------------------------------------------|----------------------|--------------------|-------------------|-------------------------|----------------|---------------------------------------------------|--------------------------------------------------------------------------------------|
| AAEL00895 transcription factor kayak                                            | -0.236480565186423   | 0.065499140844638  | 0.397837025777134 | NA                      | aag04013 ; aag | XP_019558499.1 PRE                                | XP_001653617.1transcription factor kayak isoform X3                                  |
| AAEL00336 60 kDa S5-A/Ro ribonucleoprotein homolog                              | -0.236343658284678   | 0.2272163209394555 | 0.661294889718073 | NA                      | NA             | KXJ83881.1 hypothei                               | XP_001656757.260 kDa S5-A/Ro ribonucleoprotein homolog                               |
| AAEL01945 NA                                                                    | -0.23629558507191    | 0.173969671456373  | 0.597209919209252 | NA                      | NA             | NA                                                | XP_021711392.1Iplasma membrane calcium-transporting ATPase 2 isoform X1              |
| AAEL00445 39S ribosomal protein L14, mitochondrial                              | -0.236200813689521   | 0.163267814952972  | 0.581366301644056 | NA                      | aag03010       | KXJ69640.1 hypothei                               | XP_001649135.139S ribosomal protein L14, mitochondrial                               |
| AAEL00865 melanization protease 1                                               | -0.236076962658831   | 0.391751757968312  | 0.793285976044306 | NA                      | NA             | KXJ77534.1 hypothei                               | XP_021700244.1melanization protease 1                                                |
| AAEL01361 probable 4-coumarate-CoA ligase 3                                     | -0.236025325852935   | 0.596486117872669  | 0.889585230151692 | NA                      | NA             | NA                                                | XP_001663820.1probable 4-coumarate-CoA ligase 3                                      |
| AAEL00041 4-coumarate-CoA ligase-like 7                                         | -0.235849823412743   | 0.108951264188187  | 0.496321551019654 | NA                      | NA             | KXJ80822.1 hypothei                               | XP_001656463.14-coumarate-CoA ligase-like 7                                          |
| AAEL01415 probable cardiolipin synthase (CMP-forming)                           | -0.235711041131658   | 0.0413349250562379 | 0.320441432491577 | NA                      | aag01100 ; aag | NA                                                | XP_001648191.1probable cardiolipin synthase (CMP-forming)                            |
| AAEL01075 putative pre-mRNA-splicing factor ATP-dependent RNA helicase DHX16    | -0.235561226012856   | 0.259524767099687  | 0.692216494739513 | NA                      | aag03040       | XP_001845160.1 pre                                | XP_001661061.2putative pre-mRNA-splicing factor ATP-dependent RNA helicase DHX16     |
| AAEL01111 cartilage-associated protein                                          | -0.235550478004256   | 0.282077714667415  | 0.715554087745416 | NA                      | NA             | KXJ79620.1 hypothei                               | XP_001661444.1cartilage-associated protein                                           |
| AAEL00865 zinc transporter 2                                                    | -0.235487279702435   | 0.268526653157056  | 0.704184172798867 | NA                      | NA             | ETN60102.1 cation e                               | XP_021701493.1zinc transporter 2                                                     |
| AAEL02107 NA                                                                    | -0.235323990738538   | 0.0445050830697015 | 0.334042230348608 | NA                      | NA             | NA                                                | XP_021708803.1uncharacterized protein LOC5566878                                     |
| AAEL00035 tyrosine-protein kinase Dnt                                           | -0.235240084016446   | 0.399764948178773  | 0.798648539435638 | NA                      | aag04310       | KFB48191.1 tyrosine-                              | XP_021702281.1tyrosine-protein kinase Dnt                                            |
| AAEL00941 eukaryotic translation initiation factor 2D                           | -0.235166996086073   | 0.0702097305426641 | 0.407517366963152 | NA                      | NA             | NA                                                | XP_001660028.1eukaryotic translation initiation factor 2D                            |
| AAEL00615 E3 ubiquitin-protein ligase TRIM37                                    | -0.23507516252331    | 0.305567163244298  | 0.738400482188558 | NA                      | NA             | KXJ79967.1 hypothei                               | XP_001657507.1E3 ubiquitin-protein ligase TRIM37                                     |
| AAEL00345 NADH dehydrogenase [ubiquinone] 1 beta subcomplex subunit 1           | -0.23493614947927    | 0.0571751962647625 | 0.375057077651547 | NA                      | aag01100 ; aag | KFB48930.1 AGAP00                                 | XP_001656776.1NADH dehydrogenase [ubiquinone] 1 beta subcomplex subunit 1            |
| AAEL01701 fibrous sheath CABYR-binding protein                                  | -0.23491168746174    | 0.0817526435286841 | 0.435494403400817 | NA                      | NA             | NA                                                | XP_021701309.1fibrous sheath CABYR-binding protein isoform X2                        |
| AAEL00305 uncharacterized LOC5576890                                            | -0.234880620123084   | 0.179177649375203  | 0.604695248815902 | NA                      | NA             | KXJ70065.1 hypothei                               | XP_001662990.2uncharacterized protein LOC5576890 isoform X1                          |
| AAEL02505 NA                                                                    | -0.234871375072717   | 0.0655695682150411 | 0.397878167603183 | NA                      | NA             | NA                                                | XP_021707602.1uncharacterized protein LOC5565521 isoform X1                          |
| AAEL01375 cytochrome P450 4d1                                                   | -0.234851825070468   | 0.4710293040009    | 0.841469450155131 | NA                      | NA             | NA                                                | XP_001663987.1cytochrome P450 4d1                                                    |
| AAEL01962 NA                                                                    | -0.234813547121734   | 0.107050792011822  | 0.492398491132955 | NA                      | aag04144       | NA                                                | XP_021710894.1IQ motif and SEC7 domain-containing protein 1 isoform X5               |
| AAEL00035 lamin Dm0                                                             | -0.23470661106172    | 0.207493802439214  | 0.639832374753494 | NA                      | NA             | KXJ83455.1 hypothei                               | XP_001655561.2lamin Dm0                                                              |
| AAEL01065 regulator of G-protein signaling 7                                    | -0.234704115697856   | 0.318033598852206  | 0.745684464362801 | NA                      | NA             | KXJ76557.1 hypothei                               | XP_021698214.1regulator of G-protein signaling 7                                     |
| AAEL00025 syntaxin-17                                                           | -0.234570459501137   | 0.320196522969445  | 0.746314185502744 | NA                      | aag04140 ; aag | KFB45055.1 AGAP00                                 | XP_019550153.1 syntaxin-17-like                                                      |
| AAEL02295 NA                                                                    | -0.234497898800426   | 0.313971595664701  | 0.74451110779113  | 230                     | aag01100 ; aag | NA                                                | XP_021705604.1adenylate cyclase type 8                                               |
| AAEL00365 neuropeptide SIFamide receptor                                        | -0.234472618252678   | 0.478455786318722  | 0.845416382162313 | NA                      | NA             | XP_019527807.1 PRE                                | XP_021707558.1neuropeptide SIFamide receptor isoform X1                              |
| AAEL01045 FK506-binding protein 59                                              | -0.234331994208392   | 0.142117348604767  | 0.553975467550517 | NA                      | NA             | XP_001654614.1FK506-binding protein 59 isoform X2 |                                                                                      |
| AAEL00455 NA                                                                    | -0.234325332869353   | 0.338167957148063  | 0.760464697379393 | NA                      | NA             | XP_003436441.1 AG                                 | XP_019534534.1 synapsin-like                                                         |
| AAEL00265 UDP-glucuronosyltransferase 2B37                                      | -0.23401333853476    | 0.0650555988577845 | 0.39730198438886  | NA                      | aag01100 ; aag | KXJ76125.1 hypothei                               | XP_001662128.2UDP-glucuronosyltransferase 2B37                                       |
| AAEL01435 uncharacterized LOC110674005                                          | -0.234003407470922   | 0.404751459854152  | 0.800800458735306 | NA                      | NA             | NA                                                | XP_021700220.1uncharacterized protein LOC110674005 isoform X1                        |
| AAEL02585 NA                                                                    | -0.23393481369227    | 0.236487846084502  | 0.670870063357945 | NA                      | NA             | NA                                                | XP_021705901.1protein TAPT1 homolog                                                  |
| AAEL01285 uncharacterized LOC5576921                                            | -0.233823261919046   | 0.36368533085935   | 0.77825060803901  | NA                      | NA             | NA                                                | XP_001663018.1uncharacterized protein LOC5576921                                     |
| AAEL02645 NA                                                                    | -0.233804348405019   | 0.200379984445407  | 0.633770569380376 | 04151 ; 05165 ; 04714 ; | NA             | NA                                                | XP_021699127.1Ictron Rho-interacting kinase                                          |
| AAEL02485 NA                                                                    | -0.233678833427406   | 0.202756055078189  | 0.635808115244934 | NA                      | NA             | NA                                                | NA                                                                                   |
| AAEL01515 RNA polymerase II subunit A C-terminal domain phosphatase             | -0.233647112665856   | 0.246446101266056  | 0.679999107601274 | 04660 ; 04658           | NA             | NA                                                | XP_021697650.1RNA polymerase II subunit A C-terminal domain phosphatase              |
| AAEL00411 1,5-anhydro-D-fructose reductase                                      | -0.233515558988608   | 0.5070576646636465 | 0.375057077651547 | NA                      | aag01100 ; aag | KXJ83374.1 hypothei                               | XP_001648457.11,5-anhydro-D-fructose reductase                                       |
| AAEL00505 GTP-binding protein 2                                                 | -0.23349738678711    | 0.0796077395309916 | 0.431226849261068 | NA                      | NA             | KXJ83938.1 hypothei                               | XP_021693896.1GTP-binding protein 2                                                  |
| AAEL02035 NA                                                                    | -0.233478669228912   | 0.320039421313374  | 0.746140719770603 | NA                      | NA             | NA                                                | XP_021695080.1uncharacterized protein LOC5571723 isoform X1                          |
| AAEL01985 NA                                                                    | -0.233430918531656   | 0.263797335865336  | 0.698501621589975 | NA                      | NA             | NA                                                | XP_021697814.1nuclear hormone receptor FTZ-F1 isoform X2                             |
| AAEL00585 sortilin-related receptor                                             | -0.233286205967985   | 0.0549055186789984 | 0.368251153705644 | NA                      | NA             | KXJ78372.1 hypothei                               | XP_021706160.1sortilin-related receptor                                              |
| AAEL02035 NA                                                                    | -0.233255896663228   | 0.713980272634904  | 0.919530646436164 | NA                      | NA             | NA                                                | XP_021698581.1uncharacterized protein LOC110676147                                   |
| AAEL00055 C-type lectin 37Db                                                    | -0.232959626742175   | 0.114658087258133  | 0.50945616559601  | NA                      | NA             | AAV90642.1 putative                               | XP_001647974.1C-type lectin 37Db                                                     |
| AAEL01405 retinal dehydrogenase 2                                               | -0.23294959349588    | 0.107712656100394  | 0.493785323831772 | NA                      | aag01100 ; aag | NA                                                | XP_001648014.1retinal dehydrogenase 2                                                |
| AAEL00125 myosin-VIIa                                                           | -0.232778789563767   | 0.150506302449951  | 0.566025396924239 | NA                      | NA             | KXJ70961.1 hypothei                               | XP_019535868.1 myosin-VIIa                                                           |
| AAEL00115 probable NADH dehydrogenase [ubiquinone] 1 alpha subcomplex subunit 1 | -0.23257907375031428 | 0.0709140723031428 | 0.409506895880945 | NA                      | aag01100 ; aag | ETN57796.1 NADH d                                 | XP_001658194.1probable NADH dehydrogenase [ubiquinone] 1 alpha subcomplex subunit 12 |
| AAEL01345 phenoloxidase 2                                                       | -0.232416878094363   | 0.0806971980995103 | 0.433079891352508 | NA                      | NA             | NA                                                | XP_001663686.2phenoloxidase 2                                                        |
| AAEL02345 NA                                                                    | -0.231895808298597   | 0.458320461053121  | 0.833283524364043 | NA                      | NA             | NA                                                | XP_001656212.2zinc finger protein 2                                                  |
| AAEL01485 4-aminobutyrate aminotransferase, mitochondrial                       | -0.2318781334466502  | 0.0821769187321042 | 0.436407518662845 | 00410 ; 00640 ; 00250 ; | aag01100 ; aag | NA                                                | XP_021697848.14-aminobutyrate aminotransferase, mitochondrial                        |
| AAEL02055 NA                                                                    | -0.231801969255315   | 0.671758630247645  | 0.671758630247645 | NA                      | NA             | NA                                                | XP_001661190.2phenoloxidase 2                                                        |
| AAEL00255 tryptase-2                                                            | -0.231464942046706   | 0.097730349585297  | 0.47357276297204  | NA                      | NA             | ART33387.1 CLIPA14                                | XP_001655706.1tryptase-2                                                             |
| AAEL00845 zinc finger protein 62 homolog                                        | -0.231463561392839   | 0.438049502121463  | 0.821130886001024 | NA                      | NA             | KXJ78788.1 hypothei                               | XP_001659209.1zinc finger protein 62 homolog                                         |
| AAEL00475 uncharacterized LOC5565311                                            | -0.231383629716475   | 0.271441163730756  | 0.706703671719641 | NA                      | NA             | NA                                                | XP_001649648.2uncharacterized protein LOC5565311                                     |
| AAEL02045 NA                                                                    | -0.231181353329622   | 0.345253863651507  | 0.764941296190615 | NA                      | NA             | NA                                                | XP_021699003.1probable deoxyhypusine synthase                                        |
| AAEL02565 NA                                                                    | -0.231180085306407   | 0.196689251744595  | 0.630345746481079 | NA                      | NA             | NA                                                | XP_019933257.1 calponin homology domain-containing protein DDB_G0272472-like         |
| AAEL01995 NA                                                                    | -0.231148628678197   | 0.0642523789185086 | 0.395485211242887 | 04151 ; 05165 ; 04714 ; | NA             | NA</                                              |                                                                                      |

|                                                                                   |                    |                    |                   |                                       |                                                                                       |                                                                                                                       |
|-----------------------------------------------------------------------------------|--------------------|--------------------|-------------------|---------------------------------------|---------------------------------------------------------------------------------------|-----------------------------------------------------------------------------------------------------------------------|
| AAEL0074: brachyurin                                                              | -0.226947325253684 | 0.169530326012228  | 0.589443594700505 | NA                                    | NA                                                                                    | KXJ70461.1 hypotheI ACV07660.1serine protease I                                                                       |
| AAEL0114: titin                                                                   | -0.226738446643326 | 0.0966592360952819 | 0.470612852142214 | NA                                    | NA                                                                                    | XP_021705084.1titin isoform X1                                                                                        |
| AAEL0027: tropomyosin-2                                                           | -0.226586468349305 | 0.0667638042757935 | 0.399540230684495 | NA                                    | NA                                                                                    | XP_003435942.1 AG; XP_001655958.1tropomyosin-1, isoforms 9A/A/B isoform X34                                           |
| AAEL0103: alpha-tocopherol transfer protein                                       | -0.226471850014965 | 0.251032949792995  | 0.683858606596939 | NA                                    | NA                                                                                    | XP_001654466.1alpha-tocopherol transfer protein                                                                       |
| AAEL0043: uncharacterized family 31 glucosidase KIAA1161                          | -0.226367528533153 | 0.252821543622026  | 0.685060024855679 | NA                                    | NA                                                                                    | KXJ75464.1 hypotheI XP_021708954.1uncharacterized family 31 glucosidase KIAA1161                                      |
| AAEL0097: lipamidase acyltransferase component of branched-chain alpha-keto acid  | -0.226349422101504 | 0.308891931481787  | 0.74192156324557  | NA                                    | aag01100; aag NA                                                                      | XP_001660333.1lipamidase acyltransferase comp. of branched-chain alpha-keto acid dehydrogenase complex, mitochondrial |
| AAEL0029: sesquipedalian-1                                                        | -0.226275893073966 | 0.161148320791351  | 0.5783128882372   | NA                                    | NA                                                                                    | KXJ70506.1 hypotheI XP_019533625.1 sesquipedalian-1-like                                                              |
| AAEL0002: potassium voltage-gated channel protein Shaker                          | -0.226241435821065 | 0.352111369902742  | 0.769212685559608 | NA                                    | NA                                                                                    | XP_021694514.1potassium voltage-gated channel protein Shaker isoform X1                                               |
| AAEL0088: protein Wnt-1                                                           | -0.226181972624571 | 0.479695201275567  | 0.845454613425911 | NA                                    | NA                                                                                    | XP_001843055.1 win XP_021700288.1protein Wnt-1                                                                        |
| AAEL0151: pre-mRNA-processing factor 19                                           | -0.226131533043763 | 0.281703443965341  | 0.715107379448722 | NA                                    | aag03040; aag NA                                                                      | XP_001650919.1pre-mRNA-processing factor 19                                                                           |
| AAEL0096: trehalase                                                               | -0.225911761895595 | 0.0492815680245164 | 0.352961636078127 | 500                                   | aag01100; aag NA                                                                      | XP_021705793.1trehalase isoform X1                                                                                    |
| AAEL0138: DDB1- and CUL4-associated factor 10 homolog                             | -0.225810703919562 | 0.275657792838412  | 0.711001645592863 | NA                                    | NA                                                                                    | XP_001664094.1DDB1- and CUL4-associated factor 10 homolog isoform X2                                                  |
| AAEL0090: alpha-tocopherol transfer protein                                       | -0.225775744175683 | 0.23335888733958   | 0.666962220912214 | NA                                    | NA                                                                                    | KFB46100.1 AGAP00 XP_001653647.2alpha-tocopherol transfer protein                                                     |
| AAEL0085: probable peroxisomal acyl-coenzyme A oxidase 1                          | -0.225298241825026 | 0.0706486929376409 | 0.40887375623407  | 00071; 00592                          | aag01100; aag KFB49756.1 AGAP01                                                       | XP_001653317.1probable peroxisomal acyl-coenzyme A oxidase 1                                                          |
| AAEL0275: NA                                                                      | -0.225229962210367 | 0.232710664709072  | 0.666707644289445 | NA                                    | NA                                                                                    | XP_021709391.1uncharacterized protein LOC5570605                                                                      |
| AAEL0001: NADH dehydrogenase [ubiquinone] 1 alpha subcomplex subunit 6            | -0.225207624804054 | 0.0810907034123419 | 0.433079891352508 | NA                                    | aag01100; aag KXJ83442.1 hypotheI                                                     | XP_019528146.1 NADH dehydrogenase [ubiquinone] 1 alpha subcomplex subunit 6                                           |
| AAEL0182: NA                                                                      | -0.225007319187222 | 0.13957398669491   | 0.549341242757296 | NA                                    | NA                                                                                    | XP_021713362.1dedicator of cytokinesis protein 3 isoform X3                                                           |
| AAEL0108: zinc finger and SCAN domain-containing protein 21                       | -0.224839018719044 | 0.459031900578804  | 0.833631645717888 | NA                                    | NA                                                                                    | KXJ68772.1 hypotheI XP_001654912.1zinc finger and SCAN domain-containing protein 21                                   |
| AAEL0211: NA                                                                      | -0.224698044153375 | 0.0572094690523859 | 0.375057077651547 | NA                                    | NA                                                                                    | XP_021703870.1maternal protein tudor                                                                                  |
| AAEL0087: prostaglandin E synthase 2                                              | -0.224662101339213 | 0.143208867993248  | 0.555375365647863 | 590                                   | aag01100; aag KXJ73625.1 hypotheI                                                     | XP_001659483.1prostaglandin E synthase 2                                                                              |
| AAEL0030: uncharacterized LOC5580307                                              | -0.224547564716752 | 0.0613254526745534 | 0.386518366788521 | NA                                    | NA                                                                                    | XP_001662925.2uncharacterized protein LOC5580307 isoform X2                                                           |
| AAEL0025: MICOS complex subunit Mic10                                             | -0.224544978036245 | 0.0770546603917386 | 0.424839415772785 | NA                                    | NA                                                                                    | ETN66410.1 hypothe XP_001655445.1MICOS complex subunit Mic10                                                          |
| AAEL0126: G patch domain and KOW motifs-containing protein                        | -0.224471844396451 | 0.397157624630412  | 0.797539006884967 | NA                                    | NA                                                                                    | KXJ76596.1 hypotheI XP_001656191.2G patch domain and KOW motifs-containing protein                                    |
| AAEL0026: probable 4-coumarate--CoA ligase 1                                      | -0.224358851299705 | 0.313208108617943  | 0.744189298893767 | NA                                    | NA                                                                                    | KXJ68503.1 hypotheI XP_001662062.1probable 4-coumarate--CoA ligase 1                                                  |
| AAEL0103: succinate dehydrogenase [ubiquinone] iron-sulfur subunit, mitochondrial | -0.224351050086909 | 0.101400011682674  | 0.483635126937812 | 00650; 00020; 00720; aag01100; aag NA | XP_001660815.1succinate dehydrogenase [ubiquinone] iron-sulfur subunit, mitochondrial |                                                                                                                       |
| AAEL0183: NA                                                                      | -0.224304766456984 | 0.0584983355576104 | 0.37907043866014  | NA                                    | NA                                                                                    | XP_021700566.1uncharacterized protein LOC5566438 isoform X2                                                           |
| AAEL0032: melanization protease 1                                                 | -0.223785598871072 | 0.293027836635605  | 0.723631099647605 | NA                                    | NA                                                                                    | XP_001842729.1 coa XP_001656657.2melanization protease 1 isoform X1                                                   |
| AAEL0136: putative ribosome-binding factor A, mitochondrial                       | -0.223716108546441 | 0.233542793708545  | 0.667084333687587 | NA                                    | NA                                                                                    | XP_001656879.1putative ribosome-binding factor A, mitochondrial                                                       |
| AAEL0278: NA                                                                      | -0.223446695118882 | 0.096811544967446  | 0.470633908275356 | NA                                    | NA                                                                                    | XP_021712418.1ubiquitin carboxyl-terminal hydrolase MINDY-3 homolog                                                   |
| AAEL0180: NA                                                                      | -0.223423936203225 | 0.168844009388791  | 0.589193240195545 | NA                                    | NA                                                                                    | XP_021706144.1serine/threonine-protein kinase minibrain isoform X2                                                    |
| AAEL0049: neuronal acetylcholine receptor subunit alpha-5                         | -0.223360690727294 | 0.449191522785164  | 0.829306073695304 | NA                                    | NA                                                                                    | KXJ76020.1 hypotheI XP_001650053.1neuronal acetylcholine receptor subunit alpha-5                                     |
| AAEL0259: NA                                                                      | -0.223144631674818 | 0.168055711078851  | 0.588003290246231 | NA                                    | NA                                                                                    | XP_001654684.1coiled-coil domain-containing protein 25                                                                |
| AAEL0113: uncharacterized LOC5574731                                              | -0.222797354206355 | 0.110093208839717  | 0.500079481483548 | NA                                    | aag04711                                                                              | XP_001661622.1uncharacterized protein LOC5574731                                                                      |
| AAEL0134: deformed epidermal autoregulatory factor 1                              | -0.222535147385623 | 0.376281815812707  | 0.78320408710892  | NA                                    | NA                                                                                    | XP_001663598.1deformed epidermal autoregulatory factor 1                                                              |
| AAEL0050: uncharacterized LOC5565861                                              | -0.222479509604168 | 0.372714676905186  | 0.781817769662763 | NA                                    | NA                                                                                    | KXJ83952.1 hypotheI XP_019561276.1 multidrug resistance-associated protein 1-like                                     |
| AAEL0051: long-chain fatty acid transport protein 4                               | -0.222357320601136 | 0.105828684218953  | 0.490374022320757 | NA                                    | NA                                                                                    | KXJ84416.1 hypotheI XP_021710053.1long-chain fatty acid transport protein 4 isoform X1                                |
| AAEL0083: myophillin                                                              | -0.222306466787066 | 0.0458825966694826 | 0.340510283013877 | NA                                    | NA                                                                                    | XP_001850083.1 caly XP_019564906.1 myophillin-like                                                                    |
| AAEL0142: uncharacterized LOC5563994                                              | -0.222266255614009 | 0.32247532584084   | 0.746650319748046 | NA                                    | NA                                                                                    | XP_001648314.1uncharacterized protein LOC5563994                                                                      |
| AAEL0076: histone acetyltransferase KAT8                                          | -0.222232922551927 | 0.254782904663863  | 0.686935918170778 | NA                                    | XP_019536161.1 PRE XP_001658578.2histone acetyltransferase KAT8 isoform X2            |                                                                                                                       |
| AAEL0125: DNA replication licensing factor Mcm6                                   | -0.222156102704563 | 0.24785948799944   | 0.6805884480365   | NA                                    | aag03030                                                                              | KXJ80194.1 hypotheI XP_001662645.1DNA replication licensing factor Mcm6                                               |
| AAEL0290: NA                                                                      | -0.22215507103147  | 0.181501870896532  | 0.607780282383509 | NA                                    | NA                                                                                    | KFB46585.1 AGAP009916-like protein                                                                                    |
| AAEL0007: transcription factor grauzone                                           | -0.222077931333599 | 0.555379534761903  | 0.876039097680603 | NA                                    | NA                                                                                    | KXJ68223.1 hypotheI XP_001650982.2transcription factor grauzone                                                       |
| AAEL0014: zinc finger protein SNAI2                                               | -0.221950739558478 | 0.546671495056328  | 0.871077246321788 | NA                                    | NA                                                                                    | KXJ79521.1 hypotheI XP_001659302.2zinc finger protein SNAI2 isoform X1                                                |
| AAEL0058: protein big brother                                                     | -0.221879562455988 | 0.3214124242147    | 0.746588710355934 | NA                                    | NA                                                                                    | ETN65178.1 Big brotI XP_001651492.1protein big brother                                                                |
| AAEL0046: nicastrin                                                               | -0.221876823880206 | 0.193273327092042  | 0.624628157151667 | NA                                    | aag04330                                                                              | XP_019532430.1 PRE XP_001649511.2nicastrin isoform X1                                                                 |
| AAEL0124: prostaglandin reductase 1                                               | -0.22185117437923  | 0.391112033188288  | 0.793285976044306 | NA                                    | NA                                                                                    | XP_019551937.1 PRE XP_021702748.1prostaglandin reductase 1 isoform X1                                                 |
| AAEL0048: ADP-ribosylation factor-like protein 6-interacting protein 4            | -0.221790286985344 | 0.558764757595924  | 0.877581080322399 | NA                                    | NA                                                                                    | KXJ70198.1 hypotheI XP_021693797.1ADP-ribosylation factor-like protein 6-interacting protein 4                        |
| AAEL0048: M-phase phosphoprotein 6                                                | -0.221647210126028 | 0.358432467229005  | 0.737854174836904 | NA                                    | aag03018                                                                              | ETN62430.1 M-phase XP_001649842.1M-phase phosphoprotein 6                                                             |
| AAEL0062: organic cation transporter protein                                      | -0.221434622736324 | 0.283943241359742  | 0.716319042230869 | NA                                    | KXJ81860.1 hypotheI                                                                   | XP_021700355.1organic cation transporter protein                                                                      |
| AAEL0131: excitatory amino acid transporter 3                                     | -0.221179728542661 | 0.358859643211986  | 0.77388983997572  | NA                                    | NA                                                                                    | XP_001656354.2excitatory amino acid transporter 3                                                                     |
| AAEL0062: uncharacterized LOC5567711                                              | -0.221020781154691 | 0.325279862232462  | 0.748808663732339 | NA                                    | NA                                                                                    | KXJ84015.1 hypotheI XP_001651877.2uncharacterized protein LOC5567711 isoform X1                                       |
| AAEL0137: exocyst complex component 3                                             | -0.220916146481394 | 0.318279916994263  | 0.745684464362801 | NA                                    | NA                                                                                    | XP_001663973.1exocyst complex component 3                                                                             |
| AAEL0171: U6 snRNA-associated 5m-like protein Lsm6                                | -0.22073052215701  | 0.28050177759652   | 0.714609510945122 | NA                                    | aag03040; aag NA                                                                      | XP_013112899.1 U6 snRNA-associated 5m-like protein Lsm6                                                               |
| AAEL0121: aminopeptidase N                                                        | -0.220575018542912 | 0.24970666906451   | 0.682244883827679 | 480                                   | KFB52120.1 AGAP00                                                                     | XP_001655857.2aminopeptidase N isoform X1                                                                             |
| AAEL0227: NA                                                                      | -0.220565992959277 | 0.269123860901328  | 0.705147428250005 | NA                                    | NA                                                                                    | XP_021704034.1apoptosis-resistant E3 ubiquitin protein ligase 1 isoform X4                                            |
| AAEL0228: NA                                                                      | -0.220553271699092 | 0.233300764351918  | 0.666962220912214 | NA                                    | NA                                                                                    | XP_021697520.1trafficking protein particle complex subunit 8 isoform X1                                               |
| AAEL0125: putative transporter SVOPL                                              | -0.220546639165843 | 0.222260997845981  | 0.654269258534458 | NA                                    | NA                                                                                    | KXJ81417.1 hypotheI XP_001662720.1putative transporter SVOPL                                                          |
| AAEL0255: NA                                                                      | -0.220442302120888 | 0.39103663222448   | 0.793285976044306 | NA                                    | NA                                                                                    | XP_021699093.1uncharacterized protein LOC5564044                                                                      |
| AAEL0090: G1/S-specific cyclin-E                                                  | -0.220280114143966 | 0.48533145711657   | 0.847655581875201 | NA                                    | aag04391                                                                              | KXJ81080.1 hypotheI XP_001659684.1G1/S-specific cyclin-E                                                              |
| AAEL0195: NA                                                                      | -0.220222591333878 | 0.136828233835043  | 0.545589928345625 | NA                                    | NA                                                                                    | XP_019532315.1 trichohyalin-like                                                                                      |
| AAEL0153: probable G-protein coupled receptor 158                                 | -0.220049399821245 | 0.548283400598645  | 0.872889939845802 | NA                                    | NA                                                                                    | XP_021701827.1probable G-protein coupled receptor 158 isoform X5                                                      |
| AAEL0129: somatostatin receptor type 2                                            | -0.219380367337155 | 0.467083215368026  | 0.839144816051655 | NA                                    | NA                                                                                    | XP_021705393.1somatostatin receptor type 2                                                                            |
| AAEL0003: A-agglutinin anchorage subunit                                          | -0.219366754219041 | 0.0750020319358305 | 0.420011717015769 | NA                                    | NA                                                                                    | XP_001655555.2A-agglutinin anchorage subunit isoform X3                                                               |
| AAEL0051: cyclin-dependent kinase 10                                              | -0.219119144306518 | 0.299190329672004  | 0.730496185008314 | NA                                    | KFB48544.1 AGAP00                                                                     | XP_001650496.2cyclin-dependent kinase 10                                                                              |
| AAEL0222: NA                                                                      | -0.219101284255381 | 0.462495303069136  | 0.83694823576051  | NA                                    | NA                                                                                    | NA                                                                                                                    |
| AAEL0040: cytochrome P450 4g15                                                    | -0.219060355057456 | 0.157233189990042  | 0.574474189691589 | NA                                    | NA                                                                                    | ETN64031.1 cytochr XP_001648376.1cytochrome P450 4g15                                                                 |
| AAEL0033: metaxin-2                                                               | -0.219052379156436 | 0.276651172228512  | 0.711897116008604 | NA                                    | NA                                                                                    | KXJ75625.1 hypotheI XP_019558703.1 metaxin-2-like                                                                     |
| AAEL0019: nucleolin 1                                                             | -0.21904393490171  | 0.167844871920772  | 0.58771252336946  | NA                                    | NA                                                                                    | KXJ69743.1 hypotheI XP_001660735.2nucleolin 1                                                                         |
| AAEL0059: 40S ribosomal protein S3a                                               | -0.219007673367955 | 0.13343479242376   | 0.541865383885013 | NA                                    | aag03010                                                                              | BOWN96.2 RecName XP_001663344.140S ribosomal protein S3a                                                              |
| AAEL0118: 1-acyl-sn-glycerol-3-phosphate acyltransferase alpha                    | -0.219005233649043 | 0.133955924853414  | 0.542662316284181 | 00561; 00564                          | KFB40007.1 AGAP00                                                                     | XP_021703720.11-acyl-sn-glycerol-3-phosphate acyltransferase alpha                                                    |
| AAEL0254: NA                                                                      | -0.218849206549643 | 0.106168785375194  | 0.490844601505817 | NA                                    | NA                                                                                    | XP_021706785.1multidrug resistance-associated protein 4                                                               |
| AAEL0146: acyl-CoA synthetase family member 2, mitochondrial                      | -0.218791105053891 | 0.274992364916825  | 0.710808916282197 | NA                                    | NA                                                                                    | XP_021701900.1acyl-CoA synthetase family member 2, mitochondrial                                                      |
| AAEL0237: NA                                                                      | -0.218636226373049 | 0.551809447558094  | 0.874531710113044 | NA                                    | NA                                                                                    | XP_021696465.1uncharacterized protein LOC5570496                                                                      |
| AAEL0026: equilibrative nucleoside transporter 4                                  | -0.218544765594582 | 0.2868729392451    | 0.718895294966742 | NA                                    | NA                                                                                    | KXJ73242.1 hypotheI XP_021704362.1equilibrative nucleoside transporter 4 isoform X2                                   |
| AAEL0180: NA                                                                      | -0.218448647392757 | 0.476825418778555  | 0.844867278451347 | NA                                    | NA                                                                                    | XP_021704393.1somatomedin-B and thrombospondin type-1 domain-containing protein                                       |
| AAEL0279: NA                                                                      | -0.218433580200438 | 0.179837781585821  | 0.605070298410504 | NA                                    | NA                                                                                    | NA                                                                                                                    |
| AAEL0035: solute carrier family 26 member 6                                       | -0.218336274321514 | 0.0779             |                   |                                       |                                                                                       |                                                                                                                       |

|                                                                         |                    |                    |                     |                     |               |                                                                                          |                                                                             |
|-------------------------------------------------------------------------|--------------------|--------------------|---------------------|---------------------|---------------|------------------------------------------------------------------------------------------|-----------------------------------------------------------------------------|
| AAEL00641 leucine--tRNA ligase, cytoplasmic                             | -0.217545748249906 | 0.0777161234650344 | 0.427133790979399   | 970                 | aag00970      | KXJ78242.1 hypotheI                                                                      | XP_001657794.2leucine--tRNA ligase, cytoplasmic                             |
| AAEL00765 zinc finger CCH domain-containing protein 11A                 | -0.217464030489641 | 0.0752506010218241 | 0.420011717015769   | NA                  | NA            | ETN67151.1 hypothe                                                                       | XP_021700481.1zinc finger CCH domain-containing protein 11A                 |
| AAEL00121 uncharacterized LOC5569603                                    | -0.217374805803071 | 0.0835670782013685 | 0.438667571938958   | NA                  | NA            | XP_001652883.2uncharacterized protein LOC5569603 isoform X1                              |                                                                             |
| AAEL00955 protein twisted gastrulation                                  | -0.217290817244596 | 0.22870831460203   | 0.662440639272231   | NA                  | NA            | XP_001660194.1protein twisted gastrulation                                               |                                                                             |
| AAEL00131 uncharacterized LOC5570084                                    | -0.217187043251225 | 0.326533617903948  | 0.749317294751154   | NA                  | NA            | XP_001844467.1 con                                                                       | XP_001653071.1uncharacterized protein LOC5570084 isoform X3                 |
| AAEL00191 pheromone-regulated protein PRM7                              | -0.217151409869382 | 0.165861670580737  | 0.584439853413553   | NA                  | NA            | XP_019541797.1 PRE                                                                       | XP_001654314.2pheromone-regulated protein PRM7 isoform X1                   |
| AAEL00757 charged multivesicular body protein 3                         | -0.216856794013876 | 0.235627457224234  | 0.669872619304915   | NA                  | aag04144      | AB183750.1 vacuolar                                                                      | XP_001658413.1charged multivesicular body protein 3                         |
| AAEL00925 peptidyl-prolyl cis-trans isomerase CWC27 homolog             | -0.216757726825142 | 0.410827332278775  | 0.805855841282375   | NA                  | NA            | XP_001655982.2peptidyl-prolyl cis-trans isomerase CWC27 homolog                          |                                                                             |
| AAEL00706 far upstream element-binding protein 1                        | -0.216703055012301 | 0.0544695379270813 | 0.367469712613638   | NA                  | NA            | KXJ77928.1 hypotheI                                                                      | XP_021709749.1far upstream element-binding protein 1                        |
| AAEL02037 NA                                                            | -0.21666529936862  | 0.269892782609607  | 0.705956050475727   | NA                  | NA            | XP_021713120.1serine protease 7                                                          |                                                                             |
| AAEL00731 alpha-actinin, sarcomeric                                     | -0.216642744708536 | 0.0810638242056379 | 0.433079891352508   | NA                  | NA            | XP_003435853.1 AG                                                                        | XP_021708469.1alpha-actinin, sarcomeric isoform X1                          |
| AAEL00211 ras-like protein 2                                            | -0.216544798697381 | 0.079647583247392  | 0.431226849261068   | NA                  | aag04140; aag | ETN61853.1 ras [Ano                                                                      | XP_001654734.1ras-like protein 2                                            |
| AAEL01365 SPARC                                                         | -0.216526417831761 | 0.112096570040152  | 0.503547757511443   | NA                  | NA            | XP_019535253.1 SPARC-like                                                                |                                                                             |
| AAEL00373 probable hydroxyacid-oxoacid transhydrogenase, mitochondrial  | -0.216447873155879 | 0.203368419492981  | 0.63609659651398    | NA                  | NA            | XP_019554905.1 PRE                                                                       | XP_001664064.2probable hydroxyacid-oxoacid transhydrogenase, mitochondrial  |
| AAEL01111 uncharacterized LOC5574458                                    | -0.216359205837256 | 0.119152606212715  | 0.518222042865395   | NA                  | NA            | ETN61198.1 hypothe                                                                       | XP_001661472.1uncharacterized protein LOC5574458                            |
| AAEL01105 FAD synthase                                                  | -0.216097121391504 | 0.15553560116838   | 0.573412901422848   | NA                  | aag01100; aag | XP_019540616.1 PRE                                                                       | XP_001661422.1FAD synthase isoform X2                                       |
| AAEL01725 probable cytochrome P450 6a14                                 | -0.21601475040174  | 0.257613624037364  | 0.690727276337945   | NA                  | NA            | XP_011492959.1probable cytochrome P450 6a14                                              |                                                                             |
| AAEL00831 uncharacterized LOC5570404                                    | -0.215798153783219 | 0.201528335096144  | 0.634701781910801   | NA                  | NA            | AAV90679.1 putative AAL76011.1putative 7.8 kDa secreted protein                          |                                                                             |
| AAEL00405 nucleoporin NUP53                                             | -0.215732060471216 | 0.328063747320107  | 0.750955871353141   | NA                  | aag03013      | XP_001851090.1 nuc                                                                       | XP_001648370.1nucleoporin NUP53                                             |
| AAEL02106 NA                                                            | -0.215706334557757 | 0.375076722240187  | 0.782198815065306   | NA                  | aag04140; aag | NA                                                                                       | XP_021695105.1ubiquitin-like-conjugating enzyme ATG10                       |
| AAEL00163 structural maintenance of chromosomes protein 4               | -0.215671376927743 | 0.282455008047626  | 0.715753918648043   | NA                  | NA            | XP_001842620.1 stru                                                                      | XP_001653748.2structural maintenance of chromosomes protein 4               |
| AAEL02765 NA                                                            | -0.215666110278978 | 0.30975409436686   | 0.742889924206485   | NA                  | NA            | XP_021693808.1transmembrane protein 132C isoform X3                                      |                                                                             |
| AAEL00805 uncharacterized protein F58A4.6                               | -0.215658536938418 | 0.474510377079474  | 0.844332076309675   | NA                  | NA            | XP_021708097.1uncharacterized protein F58A4.6                                            |                                                                             |
| AAEL02251 NA                                                            | -0.215647748198522 | 0.125427815419503  | 0.530481545423179   | 00780; 00061        | NA            | XP_021703368.1fatty acid synthase                                                        |                                                                             |
| AAEL00361 uncharacterized LOC5578630                                    | -0.215538097827453 | 0.152617846013808  | 0.568113296551786   | NA                  | NA            | KXJ72659.1 hypotheI                                                                      | ABF18170.1putative 34 kDa family secreted salivary protein                  |
| AAEL00873 probable very-long-chain enoyl-CoA reductase art-1            | -0.215491392302168 | 0.068286508704578  | 0.401556737593974   | NA                  | aag01100; aag | XP_001847824.1 syn                                                                       | XP_001653426.2probable very-long-chain enoyl-CoA reductase art-1            |
| AAEL02525 NA                                                            | -0.215437941106133 | 0.420659270835458  | 0.813636239562413   | NA                  | NA            | XP_021693867.1putative mediator of RNA polymerase II transcription subunit 26 isoform X6 |                                                                             |
| AAEL00401 carboxylesterase 1F                                           | -0.21516401612513  | 0.15858710807344   | 0.576519055919795   | NA                  | NA            | KXJ68641.1 hypotheI                                                                      | XP_001648280.1carboxylesterase 1F                                           |
| AAEL00254 dipeptidase 2                                                 | -0.215029290967705 | 0.36472321839251   | 0.778761496713185   | NA                  | NA            | KXJ69809.1 hypotheI                                                                      | XP_001655617.2dipeptidase 2                                                 |
| AAEL00027 NA                                                            | -0.214854763584014 | 0.0887173617589288 | 0.455313532016544   | NA                  | aag04070      | NA                                                                                       | XP_021706009.1uncharacterized protein LOC5573750                            |
| AAEL00115 synaptotagmin-1                                               | -0.214760623118775 | 0.430460521280301  | 0.819254956943399   | NA                  | NA            | KXJ69349.1 hypotheI                                                                      | XP_019932833.1 synaptotagmin-2-like                                         |
| AAEL00791 uncharacterized LOC5569758                                    | -0.214742459155062 | 0.379658705868204  | 0.785755940613825   | NA                  | NA            | XP_021704072.1uncharacterized protein LOC5569758                                         |                                                                             |
| AAEL00605 uncharacterized LOC5567389                                    | -0.214577642710539 | 0.500160016431164  | 0.858029916331016   | NA                  | NA            | XP_001659034.2myb-like protein AA isoform X1                                             |                                                                             |
| AAEL01184 2-(3-amino-3-carboxypropyl)histidine synthase subunit 1       | -0.214502860084418 | 0.0911503216433879 | 0.459220287049195   | NA                  | NA            | XP_001849514.1 con                                                                       | XP_021704121.12-(3-amino-3-carboxypropyl)histidine synthase subunit 1       |
| AAEL02131 NA                                                            | -0.214400719662517 | 0.453625914319408  | 0.832617462606238   | NA                  | NA            | XP_021698687.1PAX-interacting protein 1                                                  |                                                                             |
| AAEL00811 kelch-like protein 5                                          | -0.214358259822939 | 0.394626828373131  | 0.794957110501207   | NA                  | NA            | XP_001862213.1 acti                                                                      | XP_001653119.2kelch-like protein 5                                          |
| AAEL01201 sodium-independent sulfate anion transporter                  | -0.214283553128736 | 0.344731708380311  | 0.764706052029763   | NA                  | NA            | XP_019556156.1 PRE                                                                       | XP_021713112.1sodium-independent sulfate anion transporter isoform X2       |
| AAEL00401 uncharacterized LOC5563953                                    | -0.214024934500666 | 0.52820830986656   | 0.865973876319045   | NA                  | NA            | XP_001648304.2uncharacterized protein LOC5563953                                         |                                                                             |
| AAEL00001 peptidyl-prolyl cis-trans isomerase D                         | -0.213967928177926 | 0.370249693481091  | 0.7818176769662763  | NA                  | NA            | KXJ75457.1 hypotheI                                                                      | XP_021706246.1peptidyl-prolyl cis-trans isomerase D                         |
| AAEL02111 NA                                                            | -0.213880273377441 | 0.373093501314117  | 0.782051751547268   | NA                  | NA            | XP_021712563.1protein hu-li tai shao-like isoform X2                                     |                                                                             |
| AAEL00332 2-aminoethanethiol dioxygenase                                | -0.21368465945813  | 0.267931045041889  | 0.704026692311667   | NA                  | aag01100; aag | KXJ76818.1 hypotheI                                                                      | XP_021697701.12-aminoethanethiol dioxygenase                                |
| AAEL00181 mitochondrial import inner membrane translocase subunit Tim23 | -0.21356615410538  | 0.137945242744051  | 0.547441354014568   | NA                  | NA            | KFB48128.1 AGAP01                                                                        | XP_001654138.1mitochondrial import inner membrane translocase subunit Tim23 |
| AAEL01271 cytochrome P450 4C1                                           | -0.213553267560776 | 0.135008510078721  | 0.543359475148491   | NA                  | NA            | XP_019543098.1 PRE                                                                       | XP_001662865.3cytochrome P450 4C1                                           |
| AAEL02802 NA                                                            | -0.213198082551782 | 0.455438775229048  | 0.832617462606238   | NA                  | aag03022      | NA                                                                                       | ETN58564.11wd-repeat protein                                                |
| AAEL02311 NA                                                            | -0.213121695393199 | 0.174040453169763  | 0.597209919209252   | NA                  | NA            | XP_021703263.1jerky protein homolog-like                                                 |                                                                             |
| AAEL02451 NA                                                            | -0.212965676711196 | 0.174580878185713  | 0.598225197379102   | NA                  | NA            | XP_021709988.1dendritic arbor reduction protein 1                                        |                                                                             |
| AAEL00205 sodium/hydrogen exchanger 7                                   | -0.212888447294009 | 0.190279682485814  | 0.618521820583848   | NA                  | NA            | XP_021702079.1sodium/hydrogen exchanger 7 isoform X11                                    |                                                                             |
| AAEL00401 eukaryotic translation initiation factor 4H                   | -0.212492417219156 | 0.0689038812173194 | 0.43354246998601    | NA                  | NA            | XP_001648291.2eukaryotic translation initiation factor 4H isoform X3                     |                                                                             |
| AAEL01181 DNA replication licensing factor Mcm3                         | -0.212350345308143 | 0.285130698907738  | 0.717970179170389   | NA                  | aag03030      | KXJ80244.1 hypotheI                                                                      | XP_001661938.2DNA replication licensing factor Mcm3                         |
| AAEL01131 uridine 5'-monophosphate synthase                             | -0.212282652946527 | 0.076206816665878  | 0.422442847565909   | 00240; 00983; 00240 | aag01100; aag | KXJ80255.1 hypotheI                                                                      | XP_001655239.2uridine 5'-monophosphate synthase                             |
| AAEL02745 NA                                                            | -0.21179898549432  | 0.319374665454541  | 0.745684464362801   | 00240; 00983; 00230 | NA            | XP_021699336.1nucleoside diphosphate kinase-like                                         |                                                                             |
| AAEL02321 NA                                                            | -0.211789917603778 | 0.407742185108597  | 0.803607536382376   | NA                  | NA            | XP_021699857.1coiled-coil domain-containing protein AGAP005037 isoform X3                |                                                                             |
| AAEL00561 trypsin                                                       | -0.211712262650507 | 0.38132569987469   | 0.787361680182234   | NA                  | NA            | XP_001847488.1 tryj                                                                      | XP_001651142.1trypsin epsilon                                               |
| AAEL02351 NA                                                            | -0.21169902862332  | 0.135254078988815  | 0.543887965700835   | NA                  | NA            | XP_021694041.1indicator of cytokinesis protein 1 isoform X1                              |                                                                             |
| AAEL01401 transcriptional coactivator yorkie                            | -0.211658511834093 | 0.12691733393      | 0.531343633677825   | NA                  | aag04391; aag | XP_001664241.2transcriptional coactivator yorkie isoform X1                              |                                                                             |
| AAEL01971 NA                                                            | -0.211422098925437 | 0.414234839915666  | 0.80872375702921    | NA                  | NA            | XP_021703917.1zinc finger protein 709 isoform X1                                         |                                                                             |
| AAEL00021 protocadherin-like wing polarity protein stan                 | -0.211275147736332 | 0.371837438205672  | 0.7818176769662763  | NA                  | NA            | XP_019547035.1 PRE                                                                       | XP_001660147.3protocadherin-like wing polarity protein stan isoform X1      |
| AAEL01451 AN1-type zinc finger protein 2A                               | -0.211222734571948 | 0.358253033978439  | 0.773854174836904   | NA                  | NA            | XP_001648956.2AN1-type zinc finger protein 2A                                            |                                                                             |
| AAEL00451 uncharacterized LOC5565111                                    | -0.211089491773849 | 0.279856554200188  | 0.713956199542592   | NA                  | NA            | XP_001849366.1 con                                                                       | XP_001649458.1uncharacterized protein LOC5565111                            |
| AAEL01431 AP-2 complex subunit sigma                                    | -0.211017051711787 | 0.112439926941372  | 0.503547757511443   | NA                  | aag04144      | XP_001648627.1AP-2 complex subunit sigma                                                 |                                                                             |
| AAEL02321 NA                                                            | -0.210916117651913 | 0.513993557648699  | 0.861448202130317</ |                     |               |                                                                                          |                                                                             |

|                                                                                   |                     |                    |                   |               |                |                                                                      |                                                                                                  |
|-----------------------------------------------------------------------------------|---------------------|--------------------|-------------------|---------------|----------------|----------------------------------------------------------------------|--------------------------------------------------------------------------------------------------|
| AAEL0049f putative beta-carotene-binding protein                                  | -0.208270456925935  | 0.0873490710238133 | 0.451819084632451 | NA            | NA             | KXJ76538.1 hypothe                                                   | XP_001650121.1putative beta-carotene-binding protein isoform X1                                  |
| AAEL0058f beta-amyloid-like protein                                               | -0.20826447099886   | 0.100440311500046  | 0.480630133345515 | NA            | NA             | NA                                                                   | XP_021709738.1beta-amyloid-like protein isoform X1                                               |
| AAEL0048f serine-rich adhesin for platelets                                       | -0.208206231743357  | 0.500160016426595  | 0.858029916331016 | NA            | NA             | XP_001846079.1 con                                                   | XP_001649858.2uncharacterized protein LOC5565485                                                 |
| AAEL0084f putative glycerol kinase 5                                              | -0.207966957014321  | 0.458387437549531  | 0.833283524364043 | 561           | NA             | KXJ76915.1 hypothe                                                   | XP_001659270.2putative glycerol kinase 5                                                         |
| AAEL0260f NA                                                                      | -0.207904500590025  | 0.0907234991091934 | 0.458582874647784 | NA            | NA             | NA                                                                   | XP_021708592.1UPF0692 protein CG33108 isoform X1                                                 |
| AAEL0087f tetratricopeptide repeat protein 4                                      | -0.207894730735915  | 0.345465807556374  | 0.764941296190615 | NA            | NA             | KXJ68246.1 hypothe                                                   | XP_001653434.1tetratricopeptide repeat protein 4                                                 |
| AAEL0019f four and a half LIM domains protein 2                                   | -0.207824056121526  | 0.0713303320133147 | 0.410495134148731 | NA            | NA             | KFB47014.1 AGAP00                                                    | XP_001654345.1four and a half LIM domains protein 2 isoform X2                                   |
| AAEL0129f sodium/potassium-transporting ATPase subunit beta-1-interacting protein | -0.20765028690961   | 0.324087212015865  | 0.747806049390669 | NA            | NA             | NA                                                                   | XP_021698661.1sodium/potassium-transporting ATPase subunit beta-1-interacting protein isoform X1 |
| AAEL0082f NA                                                                      | -0.207611917101143  | 0.126479533430621  | 0.530481545423179 | NA            | NA             | XP_019525751.1 PRE                                                   | XP_001659064.2facilitated trehalose transporter Tret1-2 homolog isoform X1                       |
| AAEL0174f carboxypeptidase D                                                      | -0.207611869611234  | 0.0640060453491364 | 0.395036706780325 | NA            | NA             | NA                                                                   | XP_011493731.1carboxypeptidase D isoform X1                                                      |
| AAEL0253f NA                                                                      | -0.207496558879523  | 0.16247914018425   | 0.580859769998241 | NA            | NA             | NA                                                                   | NA                                                                                               |
| AAEL0260f NA                                                                      | -0.207400370558412  | 0.305984137449265  | 0.738783696372872 | NA            | NA             | NA                                                                   | XP_021713221.1uncharacterized protein LOC5577062                                                 |
| AAEL0088f peroxisomal acyl-coenzyme A oxidase 3                                   | -0.207282829194431  | 0.20917201969485   | 0.639832374753494 | 00071 ; 00592 | aag01100 ; aag | XP_019559471.1 PRE                                                   | XP_001653457.2peroxisomal acyl-coenzyme A oxidase 3 isoform X1                                   |
| AAEL0045f putative OPA3-like protein CG13603                                      | -0.207171654119228  | 0.254476035350559  | 0.686571057867479 | NA            | NA             | XP_019562546.1 PRE                                                   | XP_001649397.1putative OPA3-like protein CG13603 isoform X2                                      |
| AAEL0195f NA                                                                      | -0.207115642267492  | 0.391519975975405  | 0.793285976044306 | NA            | NA             | NA                                                                   | XP_019545581.1 zinc finger protein 384-like                                                      |
| AAEL0276f NA                                                                      | -0.20704556422264   | 0.213327209322482  | 0.646373717545434 | NA            | NA             | NA                                                                   | XP_021708096.1uncharacterized protein LOC5564265 isoform X2                                      |
| AAEL0108f uncharacterized LOC5574056                                              | -0.206725564867226  | 0.291494997353402  | 0.722646576583698 | NA            | NA             | KXJ71695.1 hypothe                                                   | XP_021713279.1uncharacterized protein LOC5574056                                                 |
| AAEL0003f peroxisomal acyl-coenzyme A oxidase 3                                   | -0.206724494777705  | 0.170450710967157  | 0.591212756254676 | 00071 ; 00592 | aag01100 ; aag | KFB47956.1 AGAP00                                                    | XP_001655562.1peroxisomal acyl-coenzyme A oxidase 3                                              |
| AAEL0197f NA                                                                      | -0.206717235946946  | 0.364126142089987  | 0.77844728212936  | NA            | NA             | NA                                                                   | XP_021712939.1uncharacterized protein LOC5567079 isoform X2                                      |
| AAEL0025f tryptase                                                                | -0.206664114679217  | 0.0809107603547832 | 0.433079891352508 | NA            | NA             | KFB49742.1 AGAP01                                                    | XP_019531773.1 tryptase-like isoform X1                                                          |
| AAEL0197f NA                                                                      | -0.206396679317085  | 0.12916840726503   | 0.53537966541735  | NA            | NA             | NA                                                                   | XP_021706263.1muscle LIM protein 1 isoform X2                                                    |
| AAEL0118f uncharacterized LOC5575489                                              | -0.206101038785714  | 0.425751593123715  | 0.814623464645531 | NA            | NA             | KXJ76187.1 hypothe                                                   | XP_001662006.2uncharacterized protein LOC5575489                                                 |
| AAEL0000f general odorant-binding protein 72                                      | -0.206060502318945  | 0.562226573439183  | 0.87919672735184  | NA            | NA             | ACR43440.1 odorant                                                   | XP_001647922.2general odorant-binding protein 72                                                 |
| AAEL0092f solute carrier family 22 member 4                                       | -0.206014113623539  | 0.366979348853818  | 0.780578423384551 | NA            | NA             | NA                                                                   | XP_001659801.1solute carrier family 22 member 4                                                  |
| AAEL0086f sodium leak channel non-selective protein                               | -0.205806797740643  | 0.150487654645277  | 0.566025396924239 | NA            | NA             | KXJ71397.1 hypothe                                                   | XP_001652236.1sodium leak channel non-selective protein isoform X1                               |
| AAEL0194f NA                                                                      | -0.205712599602714  | 0.506175779497924  | 0.858744381072989 | NA            | NA             | NA                                                                   | XP_021710994.1hybrid signal transduction histidine kinase A isoform X2                           |
| AAEL0136f fatty acyl-CoA reductase wat                                            | -0.205603882261601  | 0.27599538812632   | 0.71113535725659  | 73            | aag04146       | NA                                                                   | XP_001663834.1fatty acyl-CoA reductase wat                                                       |
| AAEL0012f putative inorganic phosphate cotransporter                              | -0.2055424704411749 | 0.102488895654412  | 0.484636597025644 | NA            | NA             | XP_019535875.1 PRE                                                   | XP_001658313.1putative inorganic phosphate cotransporter isoform X2                              |
| AAEL0014f lysoplasmalogenase-like protein TMEM86A                                 | -0.205509541940637  | 0.421251021253471  | 0.8140176181347   | NA            | NA             | XP_019531939.1 PRE                                                   | XP_021701068.1lysoplasmalogenase-like protein TMEM86A isoform X1                                 |
| AAEL0070f sodium-coupled monocarboxylate transporter 1                            | -0.205462475766589  | 0.307729846721486  | 0.740321581576761 | NA            | NA             | XP_001844203.1 sod                                                   | XP_001652484.1sodium-coupled monocarboxylate transporter 1                                       |
| AAEL0138f 26S proteasome non-ATPase regulatory subunit 9                          | -0.20542843022266   | 0.229828298664078  | 0.662910167685841 | NA            | NA             | NA                                                                   | XP_001660409.226S proteasome non-ATPase regulatory subunit 9                                     |
| AAEL0247f NA                                                                      | -0.205411344391906  | 0.241408336326783  | 0.676649257045098 | 330           | NA             | NA                                                                   | XP_001660440.2pyrroline-5-carboxylate reductase 1, mitochondrial                                 |
| AAEL0139f uncharacterized LOC5579040                                              | -0.205136673109064  | 0.408122182627117  | 0.8040938086342   | NA            | NA             | NA                                                                   | XP_001664217.2uncharacterized protein LOC5579040                                                 |
| AAEL0137f protein aveugle                                                         | -0.205117905481487  | 0.484460667751073  | 0.847655581875201 | NA            | NA             | NA                                                                   | XP_001663916.1protein aveugle                                                                    |
| AAEL0197f NA                                                                      | -0.205032451777044  | 0.5223188847330962 | 0.865018698932415 | NA            | NA             | NA                                                                   | XP_021694765.1protein ovo isoform X2                                                             |
| AAEL0235f NA                                                                      | -0.204884039569582  | 0.557933650478347  | 0.877474867834857 | NA            | aag03022       | NA                                                                   | XP_001649759.1transcription initiation factor TFIIID subunit 11                                  |
| AAEL0065f acetylcholine receptor subunit alpha-like 1                             | -0.204811431912074  | 0.168295163860783  | 0.588255870124114 | NA            | NA             | XP_001652010.1acetylcholine receptor subunit alpha-like 1 isoform X2 |                                                                                                  |
| AAEL0036f sodium-dependent nutrient amino acid transporter 1                      | -0.204764222038557  | 0.425864760540139  | 0.814623464645531 | NA            | NA             | KXJ80826.1 hypothe                                                   | XP_021705242.1sodium-dependent nutrient amino acid transporter 1                                 |
| AAEL0000f WD and tetratricopeptide repeats protein 1                              | -0.204671279326876  | 0.193907494279398  | 0.624868660678074 | NA            | NA             | XP_019538005.1 PRE                                                   | XP_021704841.1WD and tetratricopeptide repeats protein 1                                         |
| AAEL0094f activating transcription factor 3                                       | -0.2046288667573411 | 0.490209834945223  | 0.850081180289834 | NA            | NA             | NA                                                                   | XP_001660056.1activating transcription factor 3                                                  |
| AAEL0100f protein disulfide-isomerase A6 homolog                                  | -0.204518194179963  | 0.082902118501321  | 0.437924968110882 | NA            | aag04141       | NA                                                                   | XP_001660597.1protein disulfide-isomerase A6 homolog                                             |
| AAEL0218f NA                                                                      | -0.204353354433795  | 0.177271299882283  | 0.602182613972581 | NA            | NA             | NA                                                                   | XP_021702448.1probable nuclear hormone receptor HR38 isoform X2                                  |
| AAEL0065f sialin                                                                  | -0.204106132163413  | 0.0764061252603873 | 0.422703997806619 | NA            | NA             | XP_019533077.1 PRE                                                   | XP_021703998.1sialin isoform X1                                                                  |
| AAEL0010f heat shock protein beta-1                                               | -0.204050250276232  | 0.0790299074546    | 0.430061033942773 | NA            | NA             | XP_019562135.1 PRE                                                   | XP_001657982.1heat shock protein beta-1 isoform X4                                               |
| AAEL0204f NA                                                                      | -0.203822296110873  | 0.562861519968435  | 0.879512940524628 | NA            | NA             | NA                                                                   | XP_021696886.1uncharacterized protein LOC110675641                                               |
| AAEL0199f NA                                                                      | -0.203796903473281  | 0.34771384250887   | 0.766202772693158 | NA            | NA             | NA                                                                   | XP_021705592.1small G protein signaling modulator 2 isoform X1                                   |
| AAEL0195f NA                                                                      | -0.203755412502633  | 0.111756477661852  | 0.503122851000177 | 230           | aag04391       | NA                                                                   | XP_021704373.1MAGUK p55 subfamily member 5-A isoform X4                                          |
| AAEL0060f EF-hand domain-containing protein D2 homolog                            | -0.203603534969722  | 0.220490778736545  | 0.652412844728166 | NA            | NA             | KFB39821.1 AGAP00                                                    | XP_001651772.1EF-hand domain-containing protein D2 homolog                                       |
| AAEL0199f NA                                                                      | -0.203321070893801  | 0.297513136212126  | 0.729668411360336 | NA            | NA             | NA                                                                   | XP_021695396.1 DDB1- and CUL4-associated factor 5                                                |
| AAEL0075f uncharacterized LOC5569294                                              | -0.203227329671248  | 0.1241008593909    | 0.527832049142223 | NA            | NA             | NA                                                                   | XP_001658426.2uncharacterized protein LOC5569294 isoform X3                                      |
| AAEL0108f protein Aatf                                                            | -0.203162218683856  | 0.266149551689082  | 0.701549176351456 | NA            | NA             | KXJ71691.1 hypothe                                                   | XP_001655038.2protein Aatf                                                                       |
| AAEL0026f ras suppressor protein 1                                                | -0.203116914628806  | 0.189926701977699  | 0.618437902193483 | NA            | NA             | ETN58470.1 ras supp                                                  | XP_001662051.2ras suppressor protein 1                                                           |
| AAEL0024f CLK4-associating serine/arginine rich protein                           | -0.202954591862756  | 0.258698592074707  | 0.691547675112889 | NA            | NA             | KXJ75645.1 hypothe                                                   | XP_021704229.1CLK4-associating serine/arginine rich protein                                      |
| AAEL0086f ubiquitin-related modifier 1 homolog                                    | -0.202798376374745  | 0.0953413604486466 | 0.466913889754362 | aag04122      | NA             | ETN67257.1 Ubiquiti                                                  | XP_001653419.1ubiquitin-related modifier 1 homolog isoform X1                                    |
| AAEL0086f alpha-tubulin N-acetyltransferase                                       | -0.202511418192125  | 0.108625748490122  | 0.495725018486141 | NA            | NA             | ETN67261.1 hypothe                                                   | XP_001653412.2alpha-tubulin N-acetyltransferase                                                  |
| AAEL0009f NEDD4 family-interacting protein 1                                      | -0.202327353240346  | 0.11355402920452   | 0.506016550479416 | NA            | NA             | KXJ84284.1 hypothe                                                   | XP_001657712.2NEDD4 family-interacting protein 1                                                 |
| AAEL0116f luc7-like protein 3                                                     | -0.202291250368023  | 0.318744179910433  | 0.745684464362801 | NA            | NA             | KXJ72207.1 hypothe                                                   | XP_001655621.1luc7-like protein 3                                                                |
| AAEL0222f NA                                                                      | -0.202232180318248  | 0.498720450472693  | 0.856678287334277 | NA            | NA             | NA                                                                   | XP_019532768.1 cuticle protein 19-like                                                           |
| AAEL0093f putative carbonic anhydrase 3                                           | -0.202176286346326  | 0.17733601481812   | 0.602182613972581 | 910           | aag01100 ; aag | NA                                                                   | XP_021709524.1putative carbonic anhydrase                                                        |

|                                                                   |                     |                    |                   |                         |                |                                                             |                                                                           |
|-------------------------------------------------------------------|---------------------|--------------------|-------------------|-------------------------|----------------|-------------------------------------------------------------|---------------------------------------------------------------------------|
| AAEL0194: NA                                                      | -0.198408818765748  | 0.157492216185552  | 0.574839762234915 | NA                      | NA             | NA                                                          | XP_021713054.1PDZ and LIM domain protein Zasp isoform X1                  |
| AAEL0008: probable G-protein coupled receptor Mth-like 14         | -0.198228602515726  | 0.319555705319235  | 0.745684464362801 | NA                      | NA             | ETN67413.1 hypothe                                          | XP_021704360.1probable G-protein coupled receptor Mth-like 14             |
| AAEL0098: uncharacterized LOC5572523                              | -0.198201144997867  | 0.103194768340784  | 0.485796149609891 | NA                      | NA             | NA                                                          | AA4Y41839.1putative secreted protein precursor                            |
| AAEL0081: protein elav                                            | -0.198068061726438  | 0.137135123024115  | 0.546204444420855 | NA                      | NA             | KXJ84064.1 hypothei                                         | XP_001658986.1protein elav                                                |
| AAEL0022: uncharacterized LOC5573960                              | -0.1979583171720811 | 0.590309835141051  | 0.887668474886052 | NA                      | NA             | KXJ80521.1 hypothei                                         | XP_001654980.1uncharacterized protein LOC5573960                          |
| AAEL0048: GILT-like protein 1                                     | -0.19782006013029   | 0.0842938295192018 | 0.44100169899321  | NA                      | NA             | KXJ73234.1 hypothei                                         | XP_001649949.1GILT-like protein 1 isoform X1                              |
| AAEL0137: protein distal antenna                                  | -0.197800603105212  | 0.51736185811063   | 0.861881144752444 | NA                      | NA             | NA                                                          | XP_021710803.1protein distal antenna isoform X2                           |
| AAEL0005: protein amalgam                                         | -0.1977070717196923 | 0.359662071900222  | 0.774255626424296 | NA                      | NA             | XP_019539760.1 PRE                                          | XP_021709375.1protein amalgam isoform X2                                  |
| AAEL0056: hemicentin-2                                            | -0.197494436022479  | 0.672061980610938  | 0.912813925547137 | NA                      | NA             | KXJ70619.1 hypothei                                         | XP_019559209.1 hemicentin-2                                               |
| AAEL0243: NA                                                      | -0.197263191420218  | 0.175588508627861  | 0.599764460428203 | NA                      | NA             | NA                                                          | XP_021712948.1tollold-like protein 1                                      |
| AAEL0127: uncharacterized LOC5576671                              | -0.197245014461968  | 0.224020799431947  | 0.656259917301973 | NA                      | NA             | 38KR_A Chain A, Cry:                                        | ACAS2025.1sterol carrier protein-2 like-3 variant 1                       |
| AAEL0045: beta-galactosidase                                      | -0.197156338083304  | 0.456339926181738  | 0.832617462606238 | 00531 ; 00600 ; 00604 ; | aag01100 ; aag | KXJ73069.1 hypothei                                         | XP_001649403.2beta-galactosidase isoform X1                               |
| AAEL0197: NA                                                      | -0.197066990797833  | 0.0877551077057414 | 0.452647141876812 | NA                      | NA             | NA                                                          | XP_021708853.1interferon regulatory factor 2-binding protein 1 isoform X4 |
| AAEL0044: 39S ribosomal protein L30, mitochondrial                | -0.197047896927906  | 0.218876588813562  | 0.652412844728166 | NA                      | aag03010       | KXJ74889.1 hypothei                                         | XP_001649114.139S ribosomal protein L30, mitochondrial                    |
| AAEL0233: NA                                                      | -0.196773966613654  | 0.59092871485944   | 0.888227055559718 | NA                      | NA             | NA                                                          | XP_021698044.1zinc finger protein 708                                     |
| AAEL0032: cytochrome c oxidase subunit 6A2, mitochondrial         | -0.196744408849858  | 0.178117997142256  | 0.603698640774602 | NA                      | aag01100 ; aag | ETN66413.1 cytochrc                                         | XP_001656628.1cytochrome c oxidase subunit 6A2, mitochondrial             |
| AAEL0028: inositol-3-phosphate synthase                           | -0.196686447805266  | 0.0901544689821978 | 0.458542183179048 | 00521 ; 00562           | aag01100 ; aag | KXJ73050.1 hypothei                                         | XP_001655998.2inositol-3-phosphate synthase                               |
| AAEL0117: glutathione S-transferase                               | -0.196621051160043  | 0.184484140619441  | 0.612043911074917 | NA                      | aag01100 ; aag | XP_019529313.1 PRE                                          | XP_021711349.1glutathione S-transferase isoform X2                        |
| AAEL0025: transmembrane protease serine 2                         | -0.196290214981702  | 0.0912009202987746 | 0.459220287049195 | NA                      | NA             | NA                                                          | XP_021706988.1transmembrane protease serine 2                             |
| AAEL0197: NA                                                      | -0.1962695971036    | 0.532029040215804  | 0.866700945213732 | NA                      | NA             | NA                                                          | XP_021712752.1BMP-2-inducible protein kinase-like                         |
| AAEL0065: uncharacterized LOC5568118                              | -0.196249925830089  | 0.237370922709737  | 0.671758630274645 | NA                      | NA             | ETN66115.1 hypothe                                          | XP_021696651.1uncharacterized protein LOC5568118                          |
| AAEL0108: troponin I                                              | -0.196204026086933  | 0.129277724033618  | 0.53537966541735  | NA                      | NA             | XP_019558632.1 PRE                                          | XP_001661109.1troponin I isoform X2                                       |
| AAEL0134: WD repeat-containing protein 47                         | -0.195947905497303  | 0.156469146474385  | 0.574474189691589 | NA                      | NA             | NA                                                          | XP_021698567.1WD repeat-containing protein 47 isoform X3                  |
| AAEL0012: NA                                                      | -0.195936794104515  | 0.099321309097949  | 0.478084745672    | NA                      | NA             | XP_019562398.1 PRE                                          | XP_021698555.1anion exchange protein 3 isoform X2                         |
| AAEL0098: uncharacterized LOC5572580                              | -0.195931949946023  | 0.15577592457676   | 0.573702478134775 | NA                      | NA             | NA                                                          | XP_001654102.2uncharacterized protein LOC5572580                          |
| AAEL0092: acyl-CoA-binding protein homolog                        | -0.195899653683822  | 0.173369787349298  | 0.596392068481585 | NA                      | NA             | NA                                                          | XP_001659821.1acyl-CoA-binding protein homolog                            |
| AAEL0017: uncharacterized LOC5572072                              | -0.1958008182264587 | 0.460586429963369  | 0.834457146359854 | NA                      | NA             | KXJ70004.1 hypothei                                         | XP_022819414.1PHD finger protein 20 isoform X1                            |
| AAEL0272: NA                                                      | -0.19570266425778   | 0.569809253916119  | 0.880635379772131 | NA                      | NA             | NA                                                          | XP_021693090.1mucin-SAC isoform X5                                        |
| AAEL0254: NA                                                      | -0.195693730683719  | 0.58150922320107   | 0.883594430630159 | NA                      | NA             | NA                                                          | XP_021701324.1uncharacterized protein LOC110676710                        |
| AAEL0090: aldehyde dehydrogenase, mitochondrial                   | -0.195542832470604  | 0.0821880275856021 | 0.436407518662845 | NA                      | aag01100 ; aag | KFB41327.1 AGAP00                                           | XP_001653648.2aldehyde dehydrogenase, mitochondrial                       |
| AAEL0005: uncharacterized LOC5578444                              | -0.195374073302225  | 0.449099402553672  | 0.829306073695304 | NA                      | NA             | KXJ81980.1 hypothei                                         | XP_019526954.1 rho GTPase-activating protein gacR isoform X2              |
| AAEL0064: asparagine synthetase domain-containing protein CG17486 | -0.195241918947067  | 0.372928706256268  | 0.781903075566391 | NA                      | NA             | KXJ76164.1 hypothei                                         | XP_021708297.1asparagine synthetase domain-containing protein CG17486     |
| AAEL0269: NA                                                      | -0.195142757993813  | 0.4975570797934529 | 0.856052403704179 | NA                      | NA             | NA                                                          | XP_021703803.1ATP-binding cassette sub-family G member 4                  |
| AAEL0089: protein misato                                          | -0.195138887964585  | 0.336895031128637  | 0.758529013077004 | NA                      | NA             | XP_001862732.1 mis                                          | XP_001653622.2protein misato                                              |
| AAEL0007: serine palmitoyltransferase 2                           | -0.195119307883278  | 0.110696414579958  | 0.501764970456116 | NA                      | aag01100 ; aag | KXJ79952.1 hypothei                                         | XP_001650263.1serine palmitoyltransferase 2                               |
| AAEL0060: interleukin enhancer-binding factor 2 homolog           | -0.195013329805966  | 0.222799555032968  | 0.655580227356264 | NA                      | NA             | KFB37419.1 AGAP00                                           | XP_001651787.2interleukin enhancer-binding factor 2 homolog               |
| AAEL0125: aspartate aminotransferase, cytoplasmic                 | -0.194921528391339  | 0.102996569093285  | 0.485796149609891 | 00960 ; 00401 ; 00360 ; | aag01100 ; aag | XP_001849180.1 con                                          | XP_001662725.1aspartate aminotransferase, cytoplasmic                     |
| AAEL0172: aminopeptidase N                                        | -0.194862157803501  | 0.12900977833811   | 0.535335481333802 | 480 ; 00360 ;           | NA             | NA                                                          | XP_021693817.1aminopeptidase N                                            |
| AAEL0110: protein gustavus                                        | -0.19485818186352   | 0.340000723058971  | 0.761379832492257 | NA                      | NA             | KXJ83733.1 hypothei                                         | XP_019550757.1 protein gustavus isoform X1                                |
| AAEL0197: NA                                                      | -0.19443641217316   | 0.279789255659172  | 0.713956199542592 | NA                      | aag04144       | NA                                                          | XP_021701971.1epidermal growth factor receptor substrate 15 isoform X2    |
| AAEL0039: chromatin-remodeling complex ATPase chain lswi          | -0.194348861113856  | 0.526418472646926  | 0.865680248818465 | NA                      | NA             | KXJ69537.1 hypothei                                         | XP_001648131.1chromatin-remodeling complex ATPase chain lswi              |
| AAEL0107: putative ATP synthase subunit f, mitochondrial          | -0.194327706683446  | 0.166184688116254  | 0.584439853413553 | NA                      | aag01100 ; aag | ETN65643.1 mitocho                                          | XP_021707251.1putative ATP synthase subunit f, mitochondrial              |
| AAEL0014: exportin-1                                              | -0.194287382291692  | 0.131432024421527  | 0.538981683630591 | NA                      | aag03013 ; aag | XP_001850861.1 chr                                          | XP_019564754.1 exportin-1 isoform X1                                      |
| AAEL0009: ubiquitin-like-conjugating enzyme ATG3                  | -0.19414938115678   | 0.18470397099055   | 0.612043911074917 | NA                      | aag04140 ; aag | KXJ78032.1 hypothei                                         | XP_001657463.1ubiquitin-like-conjugating enzyme ATG3                      |
| AAEL0076: activator of basal transcription 1                      | -0.194000616448794  | 0.19110115488822   | 0.813348977896628 | NA                      | NA             | KXJ62478.1 hypothei                                         | XP_001658562.1activator of basal transcription 1                          |
| AAEL0048: uncharacterized LOC5565542                              | -0.19374309429276   | 0.152655181091604  | 0.568113296551786 | NA                      | NA             | NA                                                          | XP_001648987.2uncharacterized protein LOC5565542                          |
| AAEL0251: NA                                                      | -0.193702508156046  | 0.159906020706817  | 0.577560236664366 | NA                      | NA             | XP_021694780.1rho                                           | XP_001654980.1guanine nucleotide exchange factor 10 isoform X2            |
| AAEL0073: gamma-aminobutyric acid type B receptor subunit 1       | -0.193591393073039  | 0.635184309113513  | 0.902538767814767 | NA                      | aag04080       | ETN62953.1 gaba-b r                                         | XP_021700165.1 gamma-aminobutyric acid type B receptor subunit 1          |
| AAEL0172: protein snwA                                            | -0.193256877305495  | 0.100291854722797  | 0.480169431404357 | NA                      | NA             | XP_011493255.1protein                                       | XP_011493255.1protein snwA                                                |
| AAEL0076: partitioning defective 3 homolog                        | -0.1930949608462    | 0.169969602314564  | 0.59043423197381  | NA                      | aag04144 ; aag | NA                                                          | XP_021694681.1partitioning defective 3 homolog isoform X4                 |
| AAEL0110: dedicator of cytokinesis protein 7                      | -0.19308735467812   | 0.316934814862967  | 0.745684464362801 | NA                      | NA             | XP_019550666.1 PRE                                          | XP_001655092.2 dedicator of cytokinesis protein 7                         |
| AAEL0197: NA                                                      | -0.19303173315091   | 0.467279803401672  | 0.839170326093322 | NA                      | aag04013 ; aag | NA                                                          | XP_021697922.1protein vein                                                |
| AAEL0129: neuferricin homolog                                     | -0.19299626699585   | 0.399419517958503  | 0.798648539435638 | NA                      | NA             | NA                                                          | XP_001656305.2neuferricin homolog                                         |
| AAEL0092: lachesin                                                | -0.192838478183306  | 0.174076824957691  | 0.597209919209252 | NA                      | NA             | NA                                                          | XP_019538560.1 lachesin                                                   |
| AAEL0113: gonadotropin-releasing hormone II receptor              | -0.192820865467184  | 0.196836036314946  | 0.630345746481079 | NA                      | aag04080       | NA                                                          | XP_021700050.1gonadotropin-releasing hormone II receptor isoform X5       |
| AAEL0085: protein sel-1 homolog 1                                 | -0.19270476999557   | 0.117663254196359  | 0.515237493575542 | NA                      | aag04141       | KXJ67950.1 hypothei                                         | XP_001659361.1protein sel-1 homolog 1                                     |
| AAEL0025: toll-like receptor 7                                    | -0.19255117333216   | 0.435591631233063  | 0.820960220424486 | NA                      | NA             | KFB49716.1 toll [Ano                                        | XP_001655730.1toll-like receptor 7                                        |
| AAEL0245: NA                                                      | -0.192519643149421  | 0.245605243848825  | 0.679727114240672 | NA                      | NA             | XP_021694146.1uncharacterized protein LOC5565140 isoform X2 |                                                                           |
| AAEL0033: RING finger and SPRY domain-containing protein 1        | -0.19251297277372   | 0.279320498259239  | 0.713604060506006 | NA                      | NA             | XP_001846522.1 con                                          | XP_021702827.1RING finger and SPRY domain-containing protein 1            |
| AAEL0194: NA                                                      | -0.192479249211195  | 0.158229163593497  | 0.576186113377291 | NA                      | NA             | XP_021693563.1papilin                                       | XP_021693563.1papilin isoform X1                                          |
| AAEL0182: NA                                                      | -0.192449311840552  | 0.12306759423067   | 0.525507193554816 | NA                      | aag04013       | NA                                                          | XP_001661653                                                              |

|                                                                               |                     |                    |                   |                         |                   |                                                                                               |                                                                                              |
|-------------------------------------------------------------------------------|---------------------|--------------------|-------------------|-------------------------|-------------------|-----------------------------------------------------------------------------------------------|----------------------------------------------------------------------------------------------|
| AAEL0061c checkpoint protein HUS1                                             | -0.191412104448348  | 0.665474482677075  | 0.911964500946328 | NA                      | NA                | KXJ77316.1 hypothei                                                                           | XP_001657422.1checkpoint protein HUS1                                                        |
| AAEL0126c uncharacterized LOC5576617                                          | -0.191359742920811  | 0.158633585045525  | 0.576519055919795 | NA                      | NA                | KXJ80514.1 hypothei                                                                           | XP_001662771.2uncharacterized protein LOC5576617                                             |
| AAEL0020c protein tipE                                                        | -0.191290912512987  | 0.30098950430793   | 0.733161661578971 | NA                      | NA                | KXJ78915.1 hypothei                                                                           | XP_001654727.1protein tipE                                                                   |
| AAEL0199c NA                                                                  | -0.191102708787337  | 0.103966980914094  | 0.486414446815465 | 04151 ; 05165 ; 04714 ; | aag04150 ; aag NA | XP_021706127.1serine/threonine-protein kinase ULK2 isoform X2                                 |                                                                                              |
| AAEL0018c uncharacterized LOC5572466                                          | -0.191026919655136  | 0.290081093193771  | 0.721952579380462 | NA                      | NA                | KXJ73786.1 hypothei                                                                           | XP_001660412.2uncharacterized protein LOC5572466                                             |
| AAEL0060c vitellogenin-3                                                      | -0.190610083837129  | 0.175821535932071  | 0.600337578347651 | NA                      | NA                | XP_019548184.1 PRE                                                                            | XP_019548184.1 vitellogenin-3 like                                                           |
| AAEL0027c neuropeptide F                                                      | -0.190439492988859  | 0.269080492566024  | 0.705147428250005 | NA                      | NA                | AFS50167.1 neurope                                                                            | XP_021709892.1neuropeptide F isoform X4                                                      |
| AAEL0231c NA                                                                  | -0.190391008164889  | 0.10812804573081   | 0.494284290519081 | NA                      | NA                | NA                                                                                            | XP_021713210.1filamin-A isoform X3                                                           |
| AAEL0023c probable ATP-dependent RNA helicase DDX17                           | -0.190213922911038  | 0.271452424503153  | 0.706703671719641 | NA                      | NA                | KXJ69994.1 hypothei                                                                           | XP_001661370.1DEAD-box ATP-dependent RNA helicase 20 isoform X1                              |
| AAEL0106c farnesol dehydrogenase-like                                         | -0.190187941420742  | 0.407564383886736  | 0.803607536382376 | NA                      | NA                | XP_001847204.1 oxii                                                                           | XP_001661001.2farnesol dehydrogenase-like                                                    |
| AAEL0213c NA                                                                  | -0.190161117174944  | 0.10086630044868   | 0.479706814084761 | NA                      | aag04141 ; aag NA | XP_021707648.1dual specificity mitogen-activated protein kinase kinase hemipterous isoform X2 |                                                                                              |
| AAEL0011c terminal uridylyltransferase Tailor                                 | -0.190100194142175  | 0.427219854112894  | 0.815782298406567 | NA                      | NA                | XP_001654283.2terminal uridylyltransferase Tailor                                             |                                                                                              |
| AAEL0207c NA                                                                  | -0.190049932989609  | 0.333132496086264  | 0.755603950945478 | NA                      | NA                | NA                                                                                            | NA                                                                                           |
| AAEL0030c dual specificity mitogen-activated protein kinase kinase 4          | -0.1899926779999    | 0.20479773838181   | 0.637782699712521 | NA                      | aag04013          | KFB53380.1 AGAPO0                                                                             | XP_001662902.1dual specificity mitogen-activated protein kinase kinase 4                     |
| AAEL0242c NA                                                                  | -0.189874841516708  | 0.22357018337285   | 0.655920215788323 | NA                      | aag04350          | NA                                                                                            | XP_021699929.1dorsal-ventral patterning protein Sog                                          |
| AAEL0182c NA                                                                  | -0.189842748298323  | 0.520404634398235  | 0.864397733886744 | NA                      | NA                | NA                                                                                            | XP_021704777.1F-box/LRR-repeat protein 16                                                    |
| AAEL0046c peroxisomal (S)-2-hydroxy-acid oxidase GLO3                         | -0.189783950747237  | 0.10390737123618   | 0.486414446815465 | NA                      | aag01100 ; aag    | KXJ72899.1 hypothei                                                                           | XP_001649576.2peroxisomal (S)-2-hydroxy-acid oxidase GLO3                                    |
| AAEL0118c cAMP-dependent protein kinase catalytic subunit PRKX                | -0.18976501478667   | 0.290164116376275  | 0.721952579380462 | NA                      | NA                | XP_019537732.1 PRE                                                                            | XP_001661976.2cAMP-dependent protein kinase catalytic subunit PRKX                           |
| AAEL0124c uncharacterized oxidoreductase dhs-27                               | -0.189734080592153  | 0.647090012454237  | 0.906554905014882 | 901                     | NA                | XP_313880.5 AGAPO                                                                             | XP_001662618.1uncharacterized oxidoreductase dhs-27                                          |
| AAEL0072c protein anachronism                                                 | -0.189662464445737  | 0.388836208413612  | 0.793285976044306 | NA                      | NA                | XP_019535043.1 PRE                                                                            | XP_001658218.2protein anachronism                                                            |
| AAEL0026c 60S ribosomal protein L36                                           | -0.189645588676995  | 0.203865751858603  | 0.637218970313474 | NA                      | aag03010          | ETN64210.1 60S ribo                                                                           | XP_001661966.160S ribosomal protein L36                                                      |
| AAEL0093c formin-like protein CG32138                                         | -0.189633740135808  | 0.250721019053926  | 0.683858606596939 | NA                      | NA                | XP_021709642.1formin-like protein CG32138                                                     |                                                                                              |
| AAEL0015c peregrin                                                            | -0.189465290111576  | 0.464120447336041  | 0.837274753622609 | NA                      | NA                | KXJ79230.1 hypothei                                                                           | XP_021695919.1peregrin isoform X2                                                            |
| AAEL0075c cysteine sulfenic acid decarboxylase                                | -0.189401120187144  | 0.147198308145425  | 0.561952643558699 | NA                      | NA                | XP_001851393.1 glui                                                                           | XP_001658435.2cysteine sulfenic acid decarboxylase                                           |
| AAEL0267c NA                                                                  | -0.189339120009101  | 0.3904890726385    | 0.793285976044306 | NA                      | NA                | XP_021702843.1DENN domain-containing protein 1B isoform X2                                    |                                                                                              |
| AAEL0035c uncharacterized LOC5578346                                          | -0.189246278824703  | 0.541887219884041  | 0.869900911343623 | NA                      | NA                | KXJ68890.1 hypothei                                                                           | XP_021704791.1uncharacterized protein LOC5578346                                             |
| AAEL0215c NA                                                                  | -0.18923587093111   | 0.116303638122812  | 0.514016368748824 | NA                      | NA                | XP_021700085.1 junctophilin-3                                                                 |                                                                                              |
| AAEL0205c NA                                                                  | -0.189216884582992  | 0.401203921955113  | 0.798934968584928 | NA                      | NA                | XP_021703352.1uncharacterized protein LOC110677064                                            |                                                                                              |
| AAEL0096c pyruvate carboxylase, mitochondrial                                 | -0.188988670467721  | 0.103950088630339  | 0.486414446815465 | 00020 ; 00720 ; 00620   | aag01100 ; aag    | XP_001653941.1pyruvate carboxylase, mitochondrial isoform X3                                  |                                                                                              |
| AAEL0098c uncharacterized LOC5575251                                          | -0.188970146743433  | 0.422705695513062  | 0.814192545906728 | NA                      | NA                | XP_019559168.1 microtubule-associated protein futsch-like                                     |                                                                                              |
| AAEL0223c NA                                                                  | -0.188955435256674  | 0.506842153445614  | 0.859256178927183 | NA                      | NA                | XP_021707319.1inose resistant to fluoxetine protein 6 isoform X1                              |                                                                                              |
| AAEL0075c leukocyte receptor cluster member 8 homolog                         | -0.188926187676256  | 0.0900968493375648 | 0.458542183179048 | NA                      | NA                | KXJ74975.1 hypothei                                                                           | XP_001658437.2leukocyte receptor cluster member 8 homolog                                    |
| AAEL0001c probable arginine--tRNA ligase, cytoplasmic                         | -0.188897853188898  | 0.182489405991949  | 0.60931332145788  | 970                     | aag00970          | KXJ71316.1 hypothei                                                                           | XP_001658908.2probable arginine--tRNA ligase, cytoplasmic                                    |
| AAEL0127c ATP-binding cassette sub-family A member 3                          | -0.188727876770455  | 0.126449884159769  | 0.530481545423179 | NA                      | NA                | KXJ81821.1 hypothei                                                                           | XP_001662813.2ATP-binding cassette sub-family A member 3                                     |
| AAEL0083c acylphosphatase-2                                                   | -0.188633062081018  | 0.220331543994206  | 0.652412844728166 | 00620 ; 00627           | aag01100 ; aag    | KXJ75721.1 hypothei                                                                           | XP_019558405.1 acylphosphatase-2 isoform X2                                                  |
| AAEL0214c NA                                                                  | -0.188331656205976  | 0.543044707275924  | 0.869900911343623 | NA                      | NA                | XP_021697557.1chromatin modification-related protein eaf-1                                    |                                                                                              |
| AAEL0010c serine protease easter                                              | -0.188268262028974  | 0.279363776096671  | 0.713604060506006 | NA                      | NA                | KXJ83232.1 hypothei                                                                           | XP_001658015.2serine protease easter                                                         |
| AAEL0103c polyadenylate-binding protein                                       | -0.187940267667335  | 0.210705877197611  | 0.642876486065124 | NA                      | aag03013 ; aag NA | XP_001654420.1polyadenylate-binding protein                                                   |                                                                                              |
| AAEL0147c NA                                                                  | -0.187870793025136  | 0.403992135732774  | 0.800429773232221 | NA                      | NA                | XP_001649539.2cytochrome b5                                                                   |                                                                                              |
| AAEL0037c regulator of nonsense transcripts 3B                                | -0.187818801554288  | 0.290688695576826  | 0.722005075789413 | NA                      | aag03013 ; aag    | XP_001847099.1 con                                                                            | XP_021699343.1regulator of nonsense transcripts 3B                                           |
| AAEL0111c protein app1                                                        | -0.18771940327517   | 0.138722219483678  | 0.548805616375239 | NA                      | NA                | XP_019545507.1 PRE                                                                            | XP_001655114.1protein app1 isoform X1                                                        |
| AAEL0271c NA                                                                  | -0.187646903165344  | 0.102956144630802  | 0.485796149609891 | NA                      | NA                | XP_021695442.1aspartyl/asparaginyl beta-hydroxylase isoform X5                                |                                                                                              |
| AAEL0024c NA                                                                  | -0.187590805358837  | 0.1648885165621808 | 0.583566651558413 | NA                      | NA                | XP_021697003.1LOW QUALITY PROTEIN: uncharacterized protein LOC5574790                         |                                                                                              |
| AAEL0092c histone H3-like centromeric protein A                               | -0.187444052971609  | 0.569809253840129  | 0.880635379772131 | NA                      | NA                | XP_001659902.2histone H3-like centromeric protein A                                           |                                                                                              |
| AAEL0035c calcium-transporting ATPase type 2C member 1                        | -0.187427782007808  | 0.157997342678203  | 0.575615420985807 | NA                      | NA                | XP_019552700.1 PRE                                                                            | XP_001656907.2calcium-transporting ATPase type 2C member 1 isoform X1                        |
| AAEL0211c NA                                                                  | -0.187410104427353  | 0.507282854824636  | 0.859406428557307 | NA                      | NA                | XP_021711315.1 sphingosine-1-phosphate lyase                                                  |                                                                                              |
| AAEL0133c ADP-ribose pyrophosphatase, mitochondrial                           | -0.187326577431153  | 0.375611549399843  | 0.7822803136152   | NA                      | aag01100 ; aag    | XP_001663566.1ADP-ribose pyrophosphatase, mitochondrial                                       |                                                                                              |
| AAEL0194c NA                                                                  | -0.187239317496921  | 0.217023648259383  | 0.649748124914163 | NA                      | aag04320          | XP_021703807.1CUGBP Elav-like family member 2 isoform X1                                      |                                                                                              |
| AAEL0018c carboxypeptidase B                                                  | -0.186911089816725  | 0.21734856562374   | 0.650018359996468 | NA                      | NA                | XP_001654128.2carboxypeptidase B                                                              |                                                                                              |
| AAEL0065c calcium-transporting ATPase sarcoplasmic/endoplasmic reticulum type | -0.186699702327717  | 0.171988653382993  | 0.594083929590956 | NA                      | NA                | XP_019553378.1 PRE                                                                            | XP_001652085.2calcium-transporting ATPase sarcoplasmic/endoplasmic reticulum type isoform X1 |
| AAEL0019c protein bark beetle                                                 | -0.1866899155479122 | 0.299428800541295  | 0.730496810083314 | NA                      | NA                | XP_019559241.1 PRE                                                                            | XP_001654222.2protein bark beetle isoform X2                                                 |
| AAEL0006c protein pangolin, isoforms A/H/I/S                                  | -0.186638417399298  | 0.495984762235545  | 0.854563339971561 | NA                      | aag04310          | KXJ84109.1 hypothei                                                                           | XP_001649806.1protein pangolin, isoforms A/H/I/S                                             |
| AAEL0187c NA                                                                  | -0.186607531615669  | 0.565824829129489  | 0.880302387766415 | NA                      | aag01100 ; aag NA | XP_021700823.1glycerate kinase isoform X1                                                     |                                                                                              |
| AAEL0064c adrenodoxin-like protein, mitochondrial                             | -0.186366629022253  | 0.319536810796353  | 0.745684465462801 | NA                      | NA                | XP_001846303.1 adr                                                                            | XP_001657805.2adrenodoxin-like protein, mitochondrial                                        |
| AAEL0098c nuclear cap-binding protein subunit 1                               | -0.186171533183156  | 0.267861605842884  | 0.704026692311667 | NA                      | aag03013 ; aag NA | XP_001660456.1nuclear cap-binding protein subunit 1                                           |                                                                                              |
| AAEL0230                                                                      |                     |                    |                   |                         |                   |                                                                                               |                                                                                              |

|           |                                                      |                    |                   |                   |                       |                |                |                    |                 |                                                                          |
|-----------|------------------------------------------------------|--------------------|-------------------|-------------------|-----------------------|----------------|----------------|--------------------|-----------------|--------------------------------------------------------------------------|
| AAEL0002c | uncharacterized LOC5570053                           | -0.184018725376228 | 0.226656279770255 | 0.660446829146891 | NA                    | NA             | KXJ78657.1     | hypothel           | XP_021707851.1  | uncharacterized protein LOC5570053                                       |
| AAEL0130c | zinc finger and SCAN domain-containing protein 31    | -0.183860862818372 | 0.585867695577436 | 0.885247050033426 | NA                    | NA             | NA             | NA                 | XP_001663265.1  | zinc finger and SCAN domain-containing protein 31                        |
| AAEL0117f | phenoloxidase 2                                      | -0.183805796094395 | 0.251718065238783 | 0.684556086619159 | NA                    | NA             | XP_001870839.1 | phe                | XP_001661891.1  | phenoloxidase 2                                                          |
| AAEL0106i | acyl carrier protein, mitochondrial                  | -0.183795720242056 | 0.162832852728586 | 0.581366301644056 | NA                    | aag01100 ; aag | XP_019529314.1 | PRE                | XP_001660948.1  | acyl carrier protein, mitochondrial isoform X1                           |
| AAEL0194f | NA                                                   | -0.183592852345504 | 0.159105602765329 | 0.577560236664366 | NA                    | aag04391       | NA             | NA                 | XP_021694599.1  | protein lap4 isoform X1                                                  |
| AAEL0052c | transmembrane protein 184B                           | -0.183499894298364 | 0.102290776166796 | 0.484636597025644 | NA                    | NA             | XP_019539032.1 | PRE                | XP_001650606.1  | transmembrane protein 184B isoform X2                                    |
| AAEL0197f | NA                                                   | -0.183496548692626 | 0.270946175653733 | 0.706427507335574 | NA                    | NA             | NA             | NA                 | XP_019545263.1  | proteoglycan 4-like                                                      |
| AAEL0084c | uncharacterized LOC5570645                           | -0.183465969658525 | 0.450052176962995 | 0.829603391909751 | NA                    | NA             | KFB42624.1     | AGAP00             | KFB42624.1      | AGAP002323-like protein                                                  |
| AAEL0047f | zinc finger protein 665                              | -0.183288389006113 | 0.352128502622581 | 0.769212685559908 | NA                    | NA             | KXJ81347.1     | hypothel           | XP_021700992.1  | zinc finger protein 665                                                  |
| AAEL0078c | translation initiation factor IF-3                   | -0.183279480649501 | 0.214929663517184 | 0.648028428468258 | NA                    | NA             | KXJ69377.1     | hypothel           | XP_019565523.1  | translation initiation factor IF-3, mitochondrial-like                   |
| AAEL0097c | protein msta                                         | -0.183129004066461 | 0.539990316642793 | 0.869709828277711 | NA                    | NA             | NA             | NA                 | XP_001660315.1  | protein msta                                                             |
| AAEL0028f | bone morphogenetic protein 1                         | -0.182971171240107 | 0.347344246037224 | 0.765755091527201 | NA                    | NA             | NA             | NA                 | XP_021693261.1  | cubillin isoform X3                                                      |
| AAEL0105f | NA                                                   | -0.182950337925124 | 0.342207718327917 | 0.762653287491765 | 230                   | aag01100 ; aag | XP_019526528.1 | PRE                | XP_001660904.2  | calcium/calmodulin-dependent 3',5'-cyclic nucleotide phosphodiesterase 1 |
| AAEL0124f | general transcription factor 3C polypeptide 1        | -0.182883881577757 | 0.292951958268244 | 0.723631099647605 | NA                    | NA             | XP_019546939.1 | PRE                | XP_021713185.1  | general transcription factor 3C polypeptide 1                            |
| AAEL0026c | prestalk protein                                     | -0.182816336151929 | 0.506049200173242 | 0.858744381072989 | NA                    | NA             | KXJ80183.1     | hypothel           | XP_001655707.2  | prestalk protein                                                         |
| AAEL0025c | glutamate receptor ionotropic, kainate 2             | -0.182815856259189 | 0.443463020052134 | 0.82545872799161  | NA                    | NA             | KXJ71033.1     | hypothel           | XP_001655465.2  | glutamate receptor ionotropic, kainate 2                                 |
| AAEL0004c | protein kish                                         | -0.182723917307749 | 0.309756957701652 | 0.742889924206485 | NA                    | NA             | XP_001844384.1 | tra                | XP_001656444.1  | protein kish                                                             |
| AAEL0148c | protein diaphanous                                   | -0.182488359689577 | 0.243987842377962 | 0.679121635076226 | NA                    | NA             | XP_021701663.1 | protein diaphanous | XP_021701663.1  | protein diaphanous                                                       |
| AAEL0222f | NA                                                   | -0.182458472075492 | 0.520152170578987 | 0.864134369681863 | NA                    | NA             | NA             | NA                 | XP_021707151.1  | IGLT-like protein 1                                                      |
| AAEL0170f | CD109 antigen                                        | -0.182367740027732 | 0.136162019807504 | 0.545589928345625 | NA                    | NA             | NA             | NA                 | XP_021701341.1  | CD109 antigen                                                            |
| AAEL0211f | NA                                                   | -0.182345896968705 | 0.350997462717269 | 0.768287024720341 | 230                   | aag01100 ; aag | NA             | NA                 | XP_021694962.15 | -hydroxyisourate hydrolase                                               |
| AAEL0021c | tubulin-folding cofactor B                           | -0.182278367903624 | 0.268481227551679 | 0.704184172798867 | NA                    | NA             | ETN63340.1     | tubulin-           | XP_001654808.1  | tubulin-folding cofactor B                                               |
| AAEL0050c | zinc finger protein 266                              | -0.182194885443085 | 0.544174699021401 | 0.870383849238518 | NA                    | NA             | KXJ71836.1     | hypothel           | XP_021703603.1  | zinc finger protein 266 isoform X2                                       |
| AAEL0103c | alpha-tocopherol transfer protein-like               | -0.182162441778387 | 0.208870176910028 | 0.639832374753494 | NA                    | NA             | NA             | NA                 | XP_021702922.1  | alpha-tocopherol transfer protein isoform X1                             |
| AAEL0221f | NA                                                   | -0.182053087717853 | 0.1241474076824   | 0.527832049142223 | NA                    | NA             | NA             | NA                 | XP_021699228.1  | uncharacterized protein LOC5577147 isoform X1                            |
| AAEL0197f | NA                                                   | -0.18203628875995  | 0.55917112744372  | 0.877581080322399 | NA                    | aag01100 ; aag | NA             | NA                 | XP_021696662.1  | chondroitin sulfate N-acetylgalactosaminyltransferase 1                  |
| AAEL0062c | uncharacterized LOC5567718                           | -0.181818348187261 | 0.52204626356014  | 0.865018698932415 | NA                    | NA             | KXJ68207.1     | hypothel           | XP_001657635.1  | uncharacterized protein LOC5567718                                       |
| AAEL0045c | kynurenine formamidase                               | -0.18163458296278  | 0.453644872486253 | 0.832617462606238 | 00380 ; 00630         | aag01100 ; aag | KXJ72302.1     | hypothel           | XP_001649275.2  | kynurenine formamidase                                                   |
| AAEL0139f | guanine nucleotide-binding protein subunit beta-1    | -0.18160638341666  | 0.303887326814917 | 0.737301362252096 | NA                    | NA             | NA             | NA                 | CRK97668.1      | CLUMA_CG011050, isoform A                                                |
| AAEL0040c | probable glucosamine 6-phosphate N-acetyltransferase | -0.181558490568774 | 0.120534282753751 | 0.521710475023524 | NA                    | aag01100 ; aag | AAV84020.1     | glucosa            | XP_001648374.1  | probable glucosamine 6-phosphate N-acetyltransferase                     |
| AAEL0065f | NA                                                   | -0.181525695469401 | 0.14087193029724  | 0.552323605703731 | NA                    | NA             | KXJ84502.1     | hypothel           | XP_001652077.1  | isoleucine protease easter                                               |
| AAEL0085c | glutaminase kidney isoform, mitochondrial            | -0.181442670302562 | 0.410830155799738 | 0.80585841287375  | 00471 ; 00220 ; 00250 | aag01100 ; aag | XP_019554783.1 | PRE                | XP_001653299.2  | glutaminase liver isoform, mitochondrial isoform X2                      |
| AAEL0196f | NA                                                   | -0.181418948427035 | 0.199207654326322 | 0.633198215927742 | NA                    | NA             | NA             | NA                 | XP_021700547.1  | uncharacterized protein LOC5566421 isoform X1                            |
| AAEL0208f | NA                                                   | -0.181274714311511 | 0.1196696014111   | 0.519433807634005 | NA                    | NA             | NA             | NA                 | XP_019559044.1  | titin-like                                                               |
| AAEL0086f | ATP-binding cassette sub-family G member 1           | -0.181254478545235 | 0.148698349463061 | 0.563197902632466 | NA                    | NA             | XP_019559121.1 | PRE                | XP_001659406.1  | ATP-binding cassette sub-family G member 1 isoform X2                    |
| AAEL0013c | integrator complex subunit 4                         | -0.181184106946334 | 0.390301953705117 | 0.793285976044306 | NA                    | NA             | KXJ76091.1     | hypothel           | XP_001653065.1  | integrator complex subunit 4                                             |
| AAEL0199f | NA                                                   | -0.181102910084965 | 0.342964953029312 | 0.76358426442382  | 4070                  | aag04150 ; aag | NA             | NA                 | XP_021711540.1  | protein kinase C, brain isozyme isoform X1                               |
| AAEL0067f | rab11 family-interacting protein 4B                  | -0.181079069415745 | 0.101135959816188 | 0.865973876319045 | NA                    | aag04144       | XP_019546738.1 | PRE                | XP_021704961.1  | rab11 family-interacting protein 4B isoform X1                           |
| AAEL0071c | facilitated trehalose transporter Tret1              | -0.180960316925737 | 0.43758913634499  | 0.820960220424486 | NA                    | NA             | KXJ82001.1     | hypothel           | XP_021700712.1  | facilitated trehalose transporter Tret1                                  |
| AAEL0111f | G2/M phase-specific E3 ubiquitin-protein ligase      | -0.180770521118527 | 0.528976218081868 | 0.865973876319045 | NA                    | NA             | NA             | NA                 | XP_001655100.1  | G2/M phase-specific E3 ubiquitin-protein ligase                          |
| AAEL0127f | ATP-binding cassette sub-family A member 1           | -0.180749347398206 | 0.152062885320761 | 0.568113296551786 | NA                    | NA             | XP_019547189.1 | PRE                | XP_001662815.2  | ATP-binding cassette sub-family A member 1                               |
| AAEL0095f | F-box only protein 25                                | -0.180599495443326 | 0.498009986321392 | 0.856340365764943 | NA                    | aag04068       | NA             | NA                 | XP_001660205.1  | F-box only protein 25                                                    |
| AAEL0054f | ER membrane protein complex subunit 6                | -0.180524158806233 | 0.326177911521973 | 0.748896673349414 | NA                    | NA             | KFB52656.1     | AGAP00             | XP_001650857.1  | ER membrane protein complex subunit 6                                    |
| AAEL0029f | ATP-binding cassette sub-family D member 3           | -0.180501360928177 | 0.103202666670031 | 0.485796149609891 | NA                    | aag04146 ; aag | ETN60116.1     | peroxisc           | XP_001662679.2  | ATP-binding cassette sub-family D member 3                               |
| AAEL0194f | NA                                                   | -0.180475464397152 | 0.402155838885029 | 0.799283473604722 | NA                    | NA             | NA             | NA                 | XP_021695944.1  | potassium voltage-gated channel subfamily H member 7 isoform X8          |
| AAEL0008c | UPF0587 protein GA18326                              | -0.180370499922127 | 0.22090186558698  | 0.652797615862164 | NA                    | NA             | KXJ69368.1     | hypothel           | XP_001651292.1  | UPF0587 protein GA18326                                                  |
| AAEL0019f | protein msta                                         | -0.180342573895222 | 0.479534930312719 | 0.845454613425911 | NA                    | NA             | KXJ77028.1     | hypothel           | XP_001654323.2  | protein msta                                                             |
| AAEL0149f | protein alan shepard                                 | -0.180333063958488 | 0.1662115949      |                   |                       |                |                |                    |                 |                                                                          |

|                                                                               |                     |                   |                     |                         |                |                                                                |                                                                                              |
|-------------------------------------------------------------------------------|---------------------|-------------------|---------------------|-------------------------|----------------|----------------------------------------------------------------|----------------------------------------------------------------------------------------------|
| AAEL0041C protein deadpan                                                     | -0.175607242424977  | 0.540609414052419 | 0.869735874782513   | NA                      | NA             | KXJ71291.1 hypothe                                             | XP_001648441.1protein deadpan                                                                |
| AAEL0022Z fatty acid synthase                                                 | -0.175514156566786  | 0.209818028801821 | 0.640592402466607   | 00780 ; 00061           | NA             | KXJ74484.1 hypothe                                             | XP_001654963.2fatty acid synthase                                                            |
| AAEL0246E NA                                                                  | -0.1754110760607182 | 0.647895146057866 | 0.906554905014882   | NA                      | NA             | NA                                                             | XP_021707946.1uncharacterized protein LOC5570570                                             |
| AAEL0145J NA                                                                  | -0.175121258824692  | 0.142916838727453 | 0.555375365647863   | NA                      | NA             | NA                                                             | XP_001654381.1AN1-type zinc finger protein 6                                                 |
| AAEL0025E WD repeat-containing protein 6                                      | -0.175088878768591  | 0.556505197495408 | 0.876744014213565   | NA                      | NA             | XP_001850265.1 con                                             | XP_021713407.1WD repeat-containing protein 6                                                 |
| AAEL0241X NA                                                                  | -0.175071108549962  | 0.141999906895877 | 0.553914007314906   | NA                      | NA             | NA                                                             | XP_021703940.1paired amphipathic helix protein Sin3a isoform X3                              |
| AAEL0006E maltase A3                                                          | -0.175008507795881  | 0.286948752272641 | 0.718895294966742   | NA                      | NA             | KXJ74659.1 hypothe                                             | XP_001649788.1maltase A3                                                                     |
| AAEL0243Z NA                                                                  | -0.174724036978696  | 0.598580221056049 | 0.890707502289419   | NA                      | NA             | NA                                                             | XP_021701517.1luciferin 4-monoxygenase                                                       |
| AAEL0009I cytochrome P450 6a8                                                 | -0.174236843593291  | 0.3746336106566   | 0.782198815065306   | NA                      | NA             | NA                                                             | XP_001653686.1cytochrome P450 6a8                                                            |
| AAEL0142Z uncharacterized LOC5579527                                          | -0.174223862547712  | 0.399536064832019 | 0.798648539435638   | NA                      | NA             | NA                                                             | XP_021710198.1uncharacterized protein LOC5579527 isoform X3                                  |
| AAEL0149J NA                                                                  | -0.174006421086633  | 0.312759995951725 | 0.744058294402217   | NA                      | NA             | NA                                                             | XP_001649987.2synaptic vesicle glycoprotein 2B                                               |
| AAEL0194Y NA                                                                  | -0.173818756319317  | 0.455365908455306 | 0.832617462606238   | NA                      | aag04330       | NA                                                             | XP_021704863.1neurogenic protein mastermind isoform X2                                       |
| AAEL0117Z venom allergen 5                                                    | -0.173678930052216  | 0.143279843300155 | 0.555375365647863   | NA                      | NA             | KXJ79582.1 hypothe                                             | XP_001661919.1venom allergen 5                                                               |
| AAEL0086E calysntenin-1                                                       | -0.173579075123904  | 0.128814335989638 | 0.535335481333802   | NA                      | NA             | KXJ81032.1 hypothe                                             | XP_019536954.1 calysntenin-1-like                                                            |
| AAEL0135E cytoplasmic protein NCK1                                            | -0.173492563057748  | 0.485795571415312 | 0.847790841886424   | NA                      | NA             | NA                                                             | XP_021700406.1cytoplasmic protein NCK1                                                       |
| AAEL0110E tubulin-specific chaperone E                                        | -0.173464378315558  | 0.270171407190848 | 0.706082729045778   | NA                      | NA             | KXJ80200.1 hypothe                                             | XP_021704242.1tubulin-specific chaperone E                                                   |
| AAEL0156E NA                                                                  | -0.173382756397428  | 0.529607513259402 | 0.866236817812481   | NA                      | NA             | NA                                                             | XP_001647607.2probable chitinase 10                                                          |
| AAEL0030C uncharacterized LOC5580272                                          | -0.173366367710942  | 0.270632231067089 | 0.706237745304114   | NA                      | NA             | KXJ69984.1 hypothe                                             | XP_001662899.2uncharacterized protein LOC5580272                                             |
| AAEL0101E FH1/FH2 domain-containing protein 1                                 | -0.173222732663878  | 0.201440431816356 | 0.634701781910801   | NA                      | NA             | NA                                                             | XP_021698420.1serine-rich adhesin for platelets isoform X2                                   |
| AAEL0040E acetylcholine receptor subunit alpha-like 2                         | -0.173097214026993  | 0.521368913314834 | 0.864991501344855   | NA                      | NA             | CRL05582.1 CLUMA_                                              | XP_001648279.1acetylcholine receptor subunit alpha-like 2                                    |
| AAEL0012E rap1 GTPase-GDP dissociation stimulator 1                           | -0.173093046104043  | 0.351894539746704 | 0.76921268559608    | NA                      | NA             | XP_019545833.1 PRE                                             | XP_001652902.2rap1 GTPase-GDP dissociation stimulator 1 isoform X1                           |
| AAEL0263A NA                                                                  | -0.172854435630374  | 0.623276592760799 | 0.898271200863489   | NA                      | NA             | NA                                                             | XP_021697809.1ADP,ATP carrier protein 1-like                                                 |
| AAEL0005E sn1-specific diacylglycerol lipase beta                             | -0.172853017809392  | 0.356022714056934 | 0.772867683774772   | NA                      | NA             | ETN64330.1 neural s                                            | XP_021709577.1sn1-specific diacylglycerol lipase beta                                        |
| AAEL0006E hydroxysteroid dehydrogenase-like protein 1                         | -0.172751805028455  | 0.570533033077844 | 0.880923047085115   | NA                      | NA             | KXJ73516.1 hypothe                                             | XP_001650279.2hydroxysteroid dehydrogenase-like protein 1                                    |
| AAEL0078E chitooligosaccharidolytic beta-N-acetylglucosaminidase              | -0.172516687041191  | 0.47687900937582  | 0.844867278451347   | 00513 ; 00603 ; 00604 ; | aag01100 ; aag | KXJ76695.1 hypothe                                             | XP_021693811.1chitooligosaccharidolytic beta-N-acetylglucosaminidase                         |
| AAEL0155X NA                                                                  | -0.172479104356112  | 0.287696851253214 | 0.719789675158259   | NA                      | NA             | NA                                                             | XP_019529308.1 zinc finger protein 449-like                                                  |
| AAEL0130E uncharacterized LOC5577181                                          | -0.172468439528085  | 0.609595712940068 | 0.893659351676678   | NA                      | NA             | NA                                                             | XP_001663269.2uncharacterized protein LOC5577181                                             |
| AAEL0244E NA                                                                  | -0.172399954201886  | 0.498613607441985 | 0.856678287334277   | NA                      | NA             | NA                                                             | XP_021698498.1gamma-aminobutyric acid receptor subunit alpha-4 isoform X4                    |
| AAEL0245Y NA                                                                  | -0.172301598204501  | 0.219376436219055 | 0.652412844728166   | NA                      | NA             | NA                                                             | XP_021697012.1uncharacterized protein LOC5574802                                             |
| AAEL0049E probable ribosome production factor 1                               | -0.172008493180904  | 0.191484827261841 | 0.621532056600868   | NA                      | NA             | XP_001850750.1 ribo                                            | XP_001650128.2probable ribosome production factor 1                                          |
| AAEL0094Z CAD protein                                                         | -0.171996530709976  | 0.14379208651788  | 0.556189480330851   | 00240 ; 00250 ; 00240 ; | aag01100 ; aag | NA                                                             | XP_021698953.1CAD protein                                                                    |
| AAEL0037Z lysozyme-like                                                       | -0.171982368781849  | 0.316051758677903 | 0.745684464362801   | NA                      | NA             | KXJ81084.1 hypothe                                             | XP_021698953.1putative lysozyme                                                              |
| AAEL0252Z NA                                                                  | -0.171883770855388  | 0.373700547152547 | 0.782198815065306   | NA                      | NA             | NA                                                             | NA                                                                                           |
| AAEL0134Z LYR motif-containing protein 2                                      | -0.17187244898479   | 0.407064712908927 | 0.803535299237735   | NA                      | NA             | NA                                                             | XP_001662421.2LYR motif-containing protein 2                                                 |
| AAEL0077E dipeptidyl peptidase 4                                              | -0.171560636117009  | 0.129034350967004 | 0.535335481333802   | NA                      | NA             | XP_019537022.1 PRE                                             | XP_021699731.1dipeptidyl peptidase 4 isoform X1                                              |
| AAEL0182J NA                                                                  | -0.17133915154509   | 0.138431371797293 | 0.548805616375239   | 04660 ; 04658           | NA             | NA                                                             | XP_021700082.1uncharacterized protein LOC5574376                                             |
| AAEL0007E venom allergen 3                                                    | -0.171230718154026  | 0.27441288029079  | 0.710214476791569   | NA                      | NA             | KXJ75435.1 hypothe                                             | XP_001651000.1venom allergen 3                                                               |
| AAEL0036I sodium-dependent nutrient amino acid transporter 1                  | -0.171103946618026  | 0.437869241669569 | 0.820966020424486   | NA                      | NA             | KXJ81171.1 hypothe                                             | XP_021711080.1 sodium-dependent nutrient amino acid transporter 1                            |
| AAEL0063E apyrase                                                             | -0.17100634280246   | 0.275473566777824 | 0.711001645592863   | NA                      | NA             | KXJ70935.1 hypothe                                             | XP_019556938.1 apyrase-like                                                                  |
| AAEL0036I uncharacterized LOC5578695                                          | -0.170946703123649  | 0.648820084354853 | 0.906554905014882   | NA                      | NA             | KXJ73774.1 hypothe                                             | XP_001657094.2uncharacterized protein LOC5578695 isoform X1                                  |
| AAEL0083Z dipeptidyl peptidase 9                                              | -0.170767166765958  | 0.180774277859528 | 0.606226277282573   | NA                      | NA             | XP_001862519.1 dip                                             | XP_021710715.1dipeptidyl peptidase 9                                                         |
| AAEL0183E NA                                                                  | -0.170710095099343  | 0.385419477653387 | 0.790599650772731   | NA                      | NA             | NA                                                             | XP_021693166.1calcium-activated potassium channel slowpoke isoform X19                       |
| AAEL0057E protein yellow                                                      | -0.170700819952761  | 0.318185256379732 | 0.745684464362801   | NA                      | NA             | ETN67900.1 yellow p                                            | XP_001651385.1protein yellow                                                                 |
| AAEL0009E alkylated DNA repair protein alkB homolog 8                         | -0.170637618384433  | 0.606342502190112 | 0.893547707777888   | NA                      | NA             | KFB50078.1 AGAP01                                              | XP_001657457.1alkylated DNA repair protein alkB homolog 8                                    |
| AAEL0094Z peptidoglycan-recognition protein 2                                 | -0.170536149321101  | 0.327747903539522 | 0.7506060774006273  | NA                      | NA             | NA                                                             | XP_001660103.3peptidoglycan-recognition protein 2                                            |
| AAEL0144E peptidyl-alpha-hydroxyglycine alpha-amidating lyase 2               | -0.170441929139046  | 0.221599038386554 | 0.654067488761644   | NA                      | NA             | NA                                                             | XP_021697397.1peptidyl-alpha-hydroxyglycine alpha-amidating lyase 2                          |
| AAEL0247Z NA                                                                  | -0.170353224487312  | 0.553361676257398 | 0.874619399677186   | NA                      | NA             | XP_021696208.1sodium-dependent dopamine transporter isoform X2 | XP_021696208.1sodium-dependent dopamine transporter isoform X2                               |
| AAEL0231E NA                                                                  | -0.170335604412968  | 0.264201766933932 | 0.698659663885272   | NA                      | NA             | NA                                                             | XP_021704761.1SH3 and multiple ankyrin repeat domains protein 1 isoform X4                   |
| AAEL0214Y NA                                                                  | -0.17024908910712   | 0.601073101677338 | 0.892108819618526   | NA                      | NA             | NA                                                             | XP_021711905.1zinc finger protein 2 homolog                                                  |
| AAEL0002I D-amino-acid oxidase                                                | -0.169888373485565  | 0.298150469168488 | 0.7302583490254     | NA                      | aag01100 ; aag | KXJ81152.1 hypothe                                             | XP_001658885.2D-amino-acid oxidase                                                           |
| AAEL0202Z NA                                                                  | -0.169873284227876  | 0.201715959060714 | 0.634701781910801   | NA                      | NA             | NA                                                             | NA                                                                                           |
| AAEL0290I NA                                                                  | -0.169812281187973  | 0.250314257223596 | 0.683335640523162   | NA                      | NA             | NA                                                             | XP_001660228.2apolipoprotein D isoform X2                                                    |
| AAEL0199E NA                                                                  | -0.16953960408626   | 0.68332494401073  | 0.914629465876247   | NA                      | NA             | NA                                                             | XP_021699370.1uncharacterized protein LOC5571050 isoform X1                                  |
| AAEL0267Y NA                                                                  | -0.169456539799648  | 0.265078776342764 | 0.699667453052788   | NA                      | NA             | NA                                                             | NA                                                                                           |
| AAEL0073I hiliarin                                                            | -0.169272071876791  | 0.422428513060018 | 0.814192545906728   | NA                      | NA             | KXJ81329.1 hypothe                                             | XP_019546113.1 hiliarin                                                                      |
| AAEL0034E NA                                                                  | -0.169105746914681  | 0.431978112881509 | 0.820005280371151   | NA                      | NA             | KFB38240.1 DwiI/GK:                                            | KFB38240.1DwiI/GK12675-like protein                                                          |
| AAEL0002I venom serine protease Bi-VSP                                        | -0.169099853626987  | 0.153749209920578 | 0.569537415169523   | NA                      | NA             | KXJ73780.1 hypothe                                             | XP_001654732.1venom serine protease Bi-VSP                                                   |
| AAEL0116E inactive peptidyl-prolyl cis-trans isomerase shutdown               | -0.169027259590805  | 0.252999608255412 | 0.685139021532167   | NA                      | NA             | KXJ68208.1 hypothe                                             | XP_001661808.2inactive peptidyl-prolyl cis-trans isomerase shutdown                          |
| AAEL0127E leucine-rich repeats and immunoglobulin-like domains protein sma-10 | -0.169007145612726  | 0.359362201419225 | 0.774255626424296   | NA                      | NA             | KXJ76759.1 hypothe                                             | XP_001662875.2leucine-rich repeats and immunoglobulin-like domains protein sma-10 isoform X2 |
| AAEL0044Z ATP synthase subunit d, mitochondrial                               | -0.168899147813905  | 0.22122666256702  | 0.653524167863296   | NA                      | aag01100 ; aag | ETN64697.1 ATP syn                                             | XP_001649125.1ATP synthase subunit d, mitochondrial                                          |
| AAEL0249I NA                                                                  | -0.168857403747521  | 0.221694903004517 | 0.654067488761644   | NA                      | NA             | NA                                                             | EAT33931.1AAEL013800                                                                         |
| AAEL0061X dynactin subunit 1                                                  | -0.168769325126296  | 0.151368710721985 | 0.566217429294919   | NA                      | NA             | NA                                                             | XP_001657515.1dynactin subunit 1 isoform X8                                                  |
| AAEL0045E transducin beta-like protein 3                                      | -0.168764285017695  | 0.305365037616272 | 0.738299809812121</ |                         |                |                                                                |                                                                                              |

|                                                                                        |                     |                    |                    |                         |                        |                                                             |                                                                                            |
|----------------------------------------------------------------------------------------|---------------------|--------------------|--------------------|-------------------------|------------------------|-------------------------------------------------------------|--------------------------------------------------------------------------------------------|
| AAEL01027: polymerase-2                                                                | -0.164527951143445  | 0.671578125071129  | 0.912812708172959  | NA                      | NA                     | NA                                                          | XP_019544424.1 polymerase-2-like                                                           |
| AAEL00022: signal transducing adapter molecule 2                                       | -0.164470324011551  | 0.169187729232502  | 0.589285695468509  | NA                      | aag04144               | XP_019551341.1 PRE                                          | XP_001654992.2signal transducing adapter molecule 2                                        |
| AAEL197: NA                                                                            | -0.164444727173894  | 0.127521114048077  | 0.532418008834123  | NA                      | 230 aag04391           | NA                                                          | XP_021694498.1disks large 1 tumor suppressor protein isoform X1                            |
| AAEL0097: probable serine/threonine-protein kinase yaka                                | -0.164342697564151  | 0.480982780445977  | 0.846271288463456  | NA                      | NA                     | NA                                                          | XP_021696820.1probable serine/threonine-protein kinase yaka isoform X1                     |
| AAEL0208: NA                                                                           | -0.164290939027861  | 0.154844308392101  | 0.5722398989892    | NA                      | NA                     | NA                                                          | XP_021698123.1uncharacterized protein LOC5568139                                           |
| AAEL0181: NA                                                                           | -0.164216214779214  | 0.145524296761149  | 0.558950568057442  | NA                      | NA                     | NA                                                          | ABF18040.1putative salivary secreted mucin 3                                               |
| AAEL0248: NA                                                                           | -0.163897759991955  | 0.409065235360578  | 0.805352652072751  | NA                      | NA                     | NA                                                          | XP_021703270.1integrator complex subunit 1                                                 |
| AAEL0276: NA                                                                           | -0.163771692694438  | 0.286726180026861  | 0.718895294966742  | NA                      | NA                     | NA                                                          | XP_021710599.1partner of xrn-2 protein 1-like                                              |
| AAEL0139: mitogen-activated protein kinase ERK-A                                       | -0.163752515298994  | 0.397914510812883  | 0.797539006884967  | NA                      | 4150 aag04013 ; aag NA | XP_021702009.1mitogen-activated protein kinase 1 isoform X1 |                                                                                            |
| AAEL0089: NA                                                                           | -0.163614883603529  | 0.268100990819287  | 0.704184172798867  | 00960 ; 00400 ; 00350 ; | aag01100 ; aag         | KXJ73193.1 hypothe                                          | XP_001653614.1tyrosine aminotransferase                                                    |
| AAEL0260: NA                                                                           | -0.163348688445652  | 0.281433381382082  | 0.715107379448722  | NA                      | aag03040               | NA                                                          | XP_021697878.1ATP-dependent RNA helicase DHX8                                              |
| AAEL0046: uncharacterized LOC5565211                                                   | -0.1632831477727473 | 0.658974906979324  | 0.909580313002131  | NA                      | NA                     | XP_001868748.1 con                                          | XP_021710883.1uncharacterized protein LOC5565211                                           |
| AAEL0117: migration and invasion enhancer 1                                            | -0.163239624135192  | 0.210845296434024  | 0.64308863698571   | NA                      | NA                     | KXJ78467.1 hypothe                                          | XP_001661860.2migration and invasion enhancer 1                                            |
| AAEL0116: THO complex subunit 5 homolog B                                              | -0.163227411954583  | 0.415424821130367  | 0.809573481450831  | NA                      | aag03013               | KXJ68389.1 hypothe                                          | XP_001661802.1THO complex subunit 5 homolog B                                              |
| AAEL0085: transcription factor grauzone                                                | -0.163212332149843  | 0.535160935829184  | 0.866998403433126  | NA                      | NA                     | KXJ68030.1 hypothe                                          | XP_001659341.2transcription factor grauzone                                                |
| AAEL0067: sugar transporter SWEET1                                                     | -0.163133387619817  | 0.191922180668848  | 0.622073936778705  | NA                      | NA                     | KXJ81784.1 hypothe                                          | XP_001652204.1sugar transporter SWEET1                                                     |
| AAEL0183: NA                                                                           | -0.163070396443678  | 0.578514550109386  | 0.882283691803025  | NA                      | NA                     | NA                                                          | XP_021712981.1transcription factor grauzone                                                |
| AAEL0194: NA                                                                           | -0.162914092669912  | 0.193879447841264  | 0.624986606780741  | NA                      | NA                     | NA                                                          | XP_021696732.1itin homolog isoform X7                                                      |
| AAEL0028: uncharacterized LOC5576462                                                   | -0.162747623306927  | 0.598051278619367  | 0.890496418423206  | NA                      | NA                     | NA                                                          | XP_021700312.1uncharacterized protein LOC5576462 isoform X3                                |
| AAEL0118: cytochrome P450 315a1, mitochondrial                                         | -0.162617336940309  | 0.568559512686219  | 0.880635377971121  | NA                      | aag00981               | XP_019555634.1 PRE                                          | XP_001661987.3cytochrome P450 315a1, mitochondrial                                         |
| AAEL0076: regulatory-associated protein of mTOR                                        | -0.162570692093858  | 0.302574331852952  | 0.735250294168217  | NA                      | aag04150 ; aag         | ETN67147.1 regulato                                         | XP_001658591.1regulatory-associated protein of mTOR                                        |
| AAEL0258: NA                                                                           | -0.162545098874267  | 0.664057258846342  | 0.911592424421865  | NA                      | NA                     | NA                                                          | XP_021711615.1uncharacterized protein LOC5566000                                           |
| AAEL0068: dnaJ protein homolog 1                                                       | -0.162528668172723  | 0.205391980725622  | 0.638023927878659  | NA                      | NA                     | KFB45481.1 AGAP01                                           | XP_001658074.1dnaJ protein homolog 1                                                       |
| AAEL0205: NA                                                                           | -0.162470797753748  | 0.185635128301395  | 0.612922300189966  | NA                      | aag04146               | NA                                                          | XP_021698930.1peroxisomal targeting signal 1 receptor                                      |
| AAEL0054: calpain-7                                                                    | -0.162422052208237  | 0.52098219352465   | 0.864960891721031  | NA                      | NA                     | KXJ73724.1 hypothe                                          | XP_019539753.1 calpain-7-like                                                              |
| AAEL0038: proteasome subunit alpha type-3                                              | -0.162417923870463  | 0.205832537093089  | 0.638023927878659  | NA                      | aag03050               | KFB37456.1 AGAP00                                           | XP_001664262.1proteasome subunit alpha type-3                                              |
| AAEL0031: isovaleryl-CoA dehydrogenase, mitochondrial                                  | -0.162298652943457  | 0.231085184695825  | 0.66425254967488   | 280                     | aag01100 ; aag         | KXJ80523.1 hypothe                                          | XP_001663227.2isovaleryl-CoA dehydrogenase, mitochondrial                                  |
| AAEL0109: protein ELYS homolog                                                         | -0.161959619039815  | 0.38748773112504   | 0.791825725928371  | NA                      | NA                     | KXJ72266.1 hypothe                                          | XP_001661219.1protein ELYS homolog isoform X1                                              |
| AAEL0256: NA                                                                           | -0.161900474788199  | 0.222097394769332  | 0.654118491874251  | NA                      | aag03040 ; aag         | NA                                                          | XP_021709332.1heat shock 70 kDa protein cognate 2                                          |
| AAEL0129: solute carrier family 22 member 8                                            | -0.161810459879346  | 0.292717637246036  | 0.723512283028756  | NA                      | NA                     | NA                                                          | XP_001663373.2solute carrier family 22 member 8                                            |
| AAEL0273: NA                                                                           | -0.161536521600856  | 0.67006392427121   | 0.912812708172959  | NA                      | NA                     | NA                                                          | XP_021707798.1zinc finger protein 600                                                      |
| AAEL0196: NA                                                                           | -0.161494886398923  | 0.371996975337569  | 0.781817769662763  | NA                      | NA                     | NA                                                          | XP_001662365.2protein GPR107 isoform X2                                                    |
| AAEL0071: nocturnin                                                                    | -0.161480072790687  | 0.149328800245322  | 0.564785704832493  | NA                      | NA                     | NA                                                          | XP_021701475.1nocturnin isoform X3                                                         |
| AAEL0028: serine/threonine-protein phosphatase 2A regulatory subunit B'' subunit gamma | -0.161351573433806  | 0.659713986765872  | 0.909580313002131  | NA                      | aag03015               | KXJ74192.1 hypothe                                          | XP_001656002.1serine/threonine-protein phosphatase 2A regulatory subunit B'' subunit gamma |
| AAEL0057: clavesin-2                                                                   | -0.161294312261328  | 0.503911794493319  | 0.858744381072989  | NA                      | NA                     | KFB46427.1 hypothe                                          | XP_019560280.1 clavesin-2-like                                                             |
| AAEL0002: scavenger receptor class B member 1                                          | -0.161218330364818  | 0.254868212188409  | 0.68696464225467   | NA                      | NA                     | ACZ58351.1 epithelia                                        | XP_001660151.1scavenger receptor class B member 1 isoform X1                               |
| AAEL0262: NA                                                                           | -0.161161130396958  | 0.313571348277824  | 0.744448799497558  | NA                      | NA                     | NA                                                          | XP_001846781.1ATP-binding cassette transporter                                             |
| AAEL0094: uncharacterized LOC5572009                                                   | -0.161154098356504  | 0.514174561814765  | 0.8614448202130317 | NA                      | NA                     | NA                                                          | XP_001660115.2uncharacterized protein LOC5572009                                           |
| AAEL0122: survival of motor neuron-related-splicing factor 30                          | -0.161041838089792  | 0.278909484444644  | 0.713552892930006  | NA                      | aag03040               | ETN67198.1 survival                                         | XP_001662376.1survival of motor neuron-related-splicing factor 30                          |
| AAEL0134: toll-like receptor 13                                                        | -0.16102077107501   | 0.372698721614789  | 0.781817769662763  | NA                      | NA                     | NA                                                          | XP_021698584.1toll-like receptor 13 isoform X1                                             |
| AAEL0258: NA                                                                           | -0.160903440490796  | 0.205634348420459  | 0.638023927878659  | NA                      | NA                     | NA                                                          | NA                                                                                         |
| AAEL0237: NA                                                                           | -0.160812478922372  | 0.505420142041592  | 0.858744381072989  | NA                      | NA                     | NA                                                          | XP_021706128.1trophoblast glycoprotein                                                     |
| AAEL0134: glutamine synthetase 2 cytoplasmic                                           | -0.160785370095319  | 0.157898586734307  | 0.575615420985807  | 00250 ; 00220 ; 00910 ; | aag01100 ; aag         | NA                                                          | XP_001656718.1glutamine synthetase 2 cytoplasmic isoform X2                                |
| AAEL0030: netrin-B                                                                     | -0.16075560576985   | 0.305295810047541  | 0.738299809812121  | NA                      | NA                     | XP_019548443.1 PRE                                          | XP_019548443.1 netrin-B                                                                    |
| AAEL0141: serine protease inhibitor 28Dc                                               | -0.160473404893194  | 0.488135461841676  | 0.848846834445739  | NA                      | NA                     | NA                                                          | XP_001648088.2serine protease inhibitor 28Dc                                               |
| AAEL0105: glutathione S-transferase 1-1                                                | -0.160429089606356  | 0.444726436317861  | 0.826574967572089  | NA                      | NA                     | KXJ77065.1 hypothe                                          | XP_001654674.2glutathione S-transferase 1-1                                                |
| AAEL0047: protein phosphatase 1L                                                       | -0.160423115060609  | 0.152729702220942  | 0.568113296551786  | 04660 ; 04658           | NA                     | KXJ74686.1 hypothe                                          | XP_001649651.1protein phosphatase 1L isoform X1                                            |
| AAEL0242: NA                                                                           | -0.160263223450047  | 0.220717340279361  | 0.652797615862164  | 00680 ; 00010           | aag01100 ; aag         | NA                                                          | XP_021701188.1 enolase                                                                     |
| AAEL0121: ATP synthase subunit alpha, mitochondrial                                    | -0.160242182099478  | 0.284234471045129  | 0.716726857594605  | 00195 ; 00190           | aag01100 ; aag         | KFB46888.1 AGAP00                                           | XP_001655906.1ATP synthase subunit alpha, mitochondrial                                    |
| AAEL0097: proclotting enzyme                                                           | -0.16019742465426   | 0.186341329615959  | 0.614196367514984  | NA                      | NA                     | NA                                                          | XP_001654027.2proclotting enzyme                                                           |
| AAEL0075: homeobox protein araucan                                                     | -0.160133139662174  | 0.450368936352635  | 0.829854816242881  | NA                      | NA                     | KFB48386.1 AGAP00                                           | XP_021699828.1homeobox protein araucan                                                     |
| AAEL0007: rho guanine nucleotide exchange factor 7                                     | -0.159976386365675  | 0.197794106742148  | 0.631103110347174  | NA                      | NA                     | XP_019561040.1 PRE                                          | XP_021703844.1rho guanine nucleotide exchange factor 7 isoform X4                          |
| AAEL0071: zwei lg domain protein zig-8                                                 | -0.159929481160717  | 0.666643496396955  | 0.912050766257029  | NA                      | NA                     | KXJ80015.1 hypothe                                          | XP_021700717.1zwei lg domain protein zig-8                                                 |
| AAEL0121: cationic amino acid transporter 3                                            | -0.159740143837679  | 0.284347140978162  | 0.716726857594605  | NA                      | NA                     | AKN80693.1 cationic                                         | XP_001662274.1cationic amino acid transporter 3                                            |
| AAEL0105: modifier of mdg4                                                             | -0.15961450570131   | 0.207960495236168  | 0.639832374753494  | NA                      | NA                     | NA                                                          | XP_021693970.1modifier of mdg4 isoform X8                                                  |
| AAEL0002: ankryrin repeat, SAM and basic leucine zipper domain-containing protein      | -0.159591955911965  | 0.510270960727801  | 0.860452247709668  | NA                      | NA                     | KXJ81835.1 hypothe                                          | XP_001654775.2ankryrin repeat, SAM and basic leucine zipper domain-containing protein 1    |
| AAEL0132: dendritic arbor reduction protein 1                                          | -0.159477739125496  | 0.491420459908901  | 0.851610371390151  | NA                      | NA                     | NA                                                          | XP_001656564.1homeotic protein female sterile isoform X1                                   |
| AAEL0108: syndetin                                                                     | -0.159463375911742  | 0.468612912119031  | 0.840088840311577  | NA                      | NA                     | XP_001862996.1 con                                          | XP_019558629.1 syndetin                                                                    |
| AAEL0118: transmembrane protein 134                                                    | -0.159413531838551  | 0.671664295483493  | 0.912812708172959  | NA                      | NA                     | XP_001849687.1 con                                          | XP_001662016.1transmembrane protein 134 isoform X2                                         |
| AAEL0251: NA                                                                           | -0.159364351833491  | 0.189718220532152  | 0.618196552881326  | 00270 ; 00330           | NA                     | NA                                                          | XP_021712696.15-adenosylmethionine decarboxylase proenzyme-like                            |
| AAEL0290: NA                                                                           | -0.159110977280706  | 0.325919769764295  | 0.748896673349414  | NA                      | NA                     | NA                                                          | XP_021694530.1serine protease snake-like isoform X1                                        |
| AAEL0122: E3 ubiquitin-protein ligase RING1                                            | -0.1590422770164993 | 0.642039703403727  | 0.905725793457166  | NA                      | NA                     | XP_001851087.1 E3                                           | XP_001655936.1E3 ubiquitin-protein ligase RING1                                            |
| AAEL0126: uncharacterized LOC5576608                                                   | -0.159030727645971  | 0.289156543022338  | 0.721217831038796  | NA                      | NA                     | KXJ82886.1 hypothe                                          | XP_019548654.1 ATPase family AAA domain-containing protein 5                               |
| AAEL0001: single-stranded DNA-binding protein, mitochondrial                           | -0.158882456679829  | 0.482324475553198  | 0.846941547268585  | NA                      | aag03030 ; aag         | KXJ68309.1 hypothe                                          | XP_001657692.1single-stranded DNA-binding protein, mitochondrial                           |
| AAEL0237: NA                                                                           | -0.158753868925386  | 0.533421196416426  | 0.866700945213732  | NA                      | NA                     | NA                                                          | XP_021706918.1synapse-associated protein of 47 kDa isoform X4                              |
| AAEL0147: adiponectin receptor protein                                                 | -0.15868954929419   | 0.155273399449572  | 0.573091811919643  | NA                      | NA                     | NA                                                          | XP_001649426.1adiponectin receptor protein                                                 |
| AAEL0136: slit homolog 1 protein                                                       | -0.158626844300532  | 0.185529763193963  | 0.612794286041223  | NA                      | NA                     | NA                                                          | XP_001656882.1neurogenic locus notch homolog protein 3 isoform X1                          |
| AAEL0039: chromatin-remodeling complex ATPase chain lswi                               | -0.158598339853071  | 0.355382661034381  | 0.772799649418615  | NA                      | NA                     | KFB51779.1 AGAP01                                           | XP_001648130.1chromatin-remodeling complex ATPase chain lswi                               |
| AAEL0130: serine protease snake                                                        | -0.158502135674515  | 0.181401179046607  | 0.607780282383509  | NA                      | NA                     | NA                                                          | XP_019530559.1 polymerase-2-like                                                           |
| AAEL0152: NA                                                                           | -0.158205682782861  | 0.507788826051061  | 0.859709016442863  | NA                      | NA                     | NA                                                          | XP_001647790.2mitochondrial import inner membrane translocase subunit Tim21                |
| AAEL0080: protein msta                                                                 | -0.158140168539189  | 0.496270850881922  | 0.854864165072155  | NA                      | NA                     | KXJ74253.1 hypothe                                          | XP_001658830.2protein msta                                                                 |
| AAEL0083: protein peste                                                                | -0.158032686183485  | 0.194290442981387  | 0.625563560641961  | NA                      | NA                     | KXJ81808.1 hypothe                                          | XP_021709728.1protein peste                                                                |
| AAEL0028: cathepsin L                                                                  | -0.158021861203544  | 0.229951016654337  | 0.662910167658841  | NA                      | aag04140 ; aag         | XP_019552504.1 PRE                                          | XP_001655999.2cathepsin L                                                                  |
| AAEL0121: run domain Beclin-1-interacting and cysteine-rich domain-containing protein  | -0.158004974947995  | 0.408163310111101  | 0.8040930806342    | NA                      | aag04140               | KXJ84056.1 hypothe                                          | XP_001655872.2run domain Beclin-1-interacting and cysteine-rich domain-containing protein  |
| AAEL0195: NA                                                                           | -0.157941315559421  | 0.226600486272798  | 0.660446829146891  | NA                      | NA                     | NA                                                          | XP_021704635.1neurobeachin-like protein 1 isoform X2                                       |
| AAEL0034: methyltransferase-like protein 22                                            | -0.15779122323367   | 0.552527950240118  | 0.874537170113044  | NA                      | NA                     | KXJ70022.1 hypothe                                          | XP_011493735.2methyltransferase-like protein 22                                            |
| AAEL0099: putative peptidyl-prolyl cis-trans isomerase dodo                            | -0.157732420578004  | 0.339889120664474  | 0.761379834922577  | NA                      | NA                     | NA                                                          | XP_001654110.2putative peptidyl-prolyl cis-trans isomerase dodo                            |
| AAEL0112: cytochrome b561                                                              | -0.157533119922577  | 0.1751331304074022 | 0.598647199141587  | NA                      | NA                     | XP_019535596.1 PRE                                          | XP_001661561.2cytochrome b561 isoform X2                                                   |
| AAEL0102: 30 kDa salivary gland allergen Aed a 3-like                                  | -0.157338498791441  | 0.373359653861411  | 0.782192290591489  | 00620 ; 00680 ; 00630 ; | aag01100 ; aag         | KXJ74736.1 hypothe                                          | XP_001659012.2malate dehydrogenase, mitochondrial                                          |
| AAEL0081: malate dehydrogenase, mitochondrial                                          | -0.157320962602625  | 0.223140442807949  | 0.655580227356264  | 51                      | aag01100 ; aag         | XP_001864185.1 ma                                           | XP_001659176.1mitochondrial enolase superfamily member 1                                   |
| AAEL0013: mitochondrial enolase superfamily member 1                                   | -0.157292887770416  | 0.534911762868657  | 0.866763821535675  | 00450 ; 00380 ; 00270   | aag01100 ; aag         | 1YIY_A Chain A, A. Ae                                       | XP_001649143.1kynurenine--oxoglutarate transaminase 3                                      |
| AAEL0044: kynurenine--oxoglutarate transaminase 3                                      | -0.157144658754487  | 0.237830119846327  | 0.67254904319684   |                         |                        |                                                             |                                                                                            |

|                                                                        |                     |                    |                    |                         |                     |                                                        |                                                                                |
|------------------------------------------------------------------------|---------------------|--------------------|--------------------|-------------------------|---------------------|--------------------------------------------------------|--------------------------------------------------------------------------------|
| AAEL0001f cytochrome b-c1 complex subunit 9                            | -0.157087719716357  | 0.258958751509699  | 0.691547675112889  | NA                      | aag01100 ; aag      | ETN60487.1 ATP-dep                                     | XP_001658910.1cytochrome b-c1 complex subunit 9                                |
| AAEL0070f tropomodulin                                                 | -0.156908311501133  | 0.226618163859356  | 0.660446829146891  | NA                      | NA                  | XP_019552023.1 PRE                                     | XP_001658087.2tropomodulin isoform X11                                         |
| AAEL0048f NADH dehydrogenase [ubiquinone] 1 alpha subcomplex subunit 5 | -0.156902850075348  | 0.230340476835467  | 0.663173043754683  | NA                      | aag01100 ; aag      | XP_001649896.2 NAI                                     | XP_001649896.2NADH dehydrogenase [ubiquinone] 1 alpha subcomplex subunit 5     |
| AAEL0022f COP9 signalosome complex subunit 3                           | -0.1568346568334    | 0.20228889787436   | 0.635311412368553  | NA                      | NA                  | ETN65224.1 26S prot                                    | XP_001661171.1COP9 signalosome complex subunit 3                               |
| AAEL0207f NA                                                           | -0.15682497351498   | 0.515049609611852  | 0.861448202130317  | NA                      | NA                  | NA                                                     | XP_021694174.1uncharacterized protein LOC5579161                               |
| AAEL0025f perlcuin-like protein                                        | -0.156743939105138  | 0.437213457029789  | 0.820960220424486  | NA                      | NA                  | XP_019526315.1 PRE                                     | XP_001655474.2perlcuin-like protein                                            |
| AAEL0050f CBL-interacting protein kinase 18                            | -0.156677003075581  | 0.21549388547799   | 0.6482554223214    | NA                      | NA                  | KUJ70580.1 hypothei                                    | XP_021705217.1CBL-interacting protein kinase 18                                |
| AAEL0281f NA                                                           | -0.156552149770891  | 0.531100204022673  | 0.866691320214768  | NA                      | NA                  | NA                                                     | XP_021695752.1HEAT repeat-containing protein 6 isoform X2                      |
| AAEL0266f NA                                                           | -0.15632363580052   | 0.432684606667892  | 0.820005528037151  | NA                      | NA                  | NA                                                     | XP_021705244.1quinone oxidoreductase-like protein 2 homolog                    |
| AAEL0254f NA                                                           | -0.156161646322973  | 0.401424563687725  | 0.799028517208403  | NA                      | aag04013 ; aag      | NA                                                     | XP_021713061.1.tumor necrosis factor receptor superfamily member wengen        |
| AAEL0052f very-long-chain (3R)-3-hydroxyacyl-CoA dehydratase hpo-8     | -0.156079822637148  | 0.516316726621545  | 0.861448202130317  | 62                      | aag01100 ; aag      | KUJ76451.1 hypothei                                    | XP_001650522.1very-long-chain (3R)-3-hydroxyacyl-CoA dehydratase hpo-8         |
| AAEL0111f histone deacetylase 3                                        | -0.156015527831054  | 0.398161457250581  | 0.797605077871316  | NA                      | NA                  | ETN59692.1 histone                                     | XP_001655108.1histone deacetylase 3                                            |
| AAEL0133f uncharacterized LOC5577721                                   | -0.155722268665314  | 0.169076045547713  | 0.589285695468509  | NA                      | NA                  | NA                                                     | XP_011493717.1uncharacterized protein LOC5577721 isoform X1                    |
| AAEL0112f connectin                                                    | -0.155507255678985  | 0.531203982396359  | 0.866691320214768  | NA                      | NA                  | KUJ79693.1 hypothei                                    | XP_019545096.1 connectin-like                                                  |
| AAEL0120f sodium-independent sulfate anion transporter                 | -0.155446582568702  | 0.463570812001094  | 0.837274753622609  | NA                      | NA                  | KUJ78344.1 hypothei                                    | XP_001662165.1sodium-independent sulfate anion transporter                     |
| AAEL0068f transient receptor potential cation channel protein painless | -0.155429231512478  | 0.338698371600327  | 0.760778306749309  | NA                      | NA                  | XP_001849122.1 tra                                     | XP_001652261.2transient receptor potential cation channel protein painless     |
| AAEL0076f putative vitellogenin receptor                               | -0.155321940901832  | 0.320538306336947  | 0.746543531995086  | NA                      | NA                  | XP_019562857.1 PRE                                     | XP_001658550.2putative vitellogenin receptor                                   |
| AAEL0041f uncharacterized LOC5564218                                   | -0.15525319420149   | 0.485931405391717  | 0.8477990841886424 | NA                      | NA                  | CRK95369.1 CLUMA                                       | CRK95369.1CLUMA_CG08673, isoform A                                             |
| AAEL0119f cryptochrome-1                                               | -0.155210070068535  | 0.239892258432819  | 0.674660318489854  | NA                      | NA                  | KUJ75191.1 hypothei                                    | XP_019560995.1 cryptochrome-1-like                                             |
| AAEL0195f NA                                                           | -0.155200624536149  | 0.371370866704287  | 0.781817769662763  | NA                      | NA                  | NA                                                     | XP_021701712.1cysteine-rich with EGF-like domain protein 2 isoform X2          |
| AAEL0052f flocculation protein FLO11                                   | -0.155161993265891  | 0.463912698392709  | 0.837274753622609  | NA                      | NA                  | KUJ82226.1 hypothei                                    | XP_021696854.1flocculation protein FLO11                                       |
| AAEL0050f E3 ubiquitin-protein ligase siah-1                           | -0.155062380806691  | 0.332574859161152  | 0.755231182999982  | NA                      | NA                  | KUJ71249.1 hypothei                                    | XP_001650197.1E3 ubiquitin-protein ligase siah-1                               |
| AAEL0180f NA                                                           | -0.154971167472027  | 0.591231332188582  | 0.888297094263466  | NA                      | NA                  | NA                                                     | XP_021706498.1uncharacterized protein LOC110678183                             |
| AAEL0277f NA                                                           | -0.154885192025187  | 0.295192830390862  | 0.72668925234262   | NA                      | NA                  | NA                                                     | XP_021710899.1tubulin polyglutamylase TTL5 isoform X2                          |
| AAEL0151f NA                                                           | -0.154841119742675  | 0.34334591438102   | 0.763685015811799  | NA                      | NA                  | NA                                                     | XP_021697982.1la-related protein CG11505 isoform X2                            |
| AAEL0183f NA                                                           | -0.154796058489269  | 0.246265658683422  | 0.679908968755239  | NA                      | NA                  | NA                                                     | XP_021702652.1uncharacterized protein LOC5564557 isoform X2                    |
| AAEL0051f phosphatidate phosphatase LPIN3                              | -0.1547794297961275 | 0.169140021158704  | 0.589285695468509  | 00564 ; 00600 ; 00565 ; | aag01100 ; aag      | KUJ83398.1 hypothei                                    | XP_021695358.1phosphatidate phosphatase LPIN3                                  |
| AAEL0142f aromatic-L-amino-acid decarboxylase                          | -0.154697870683083  | 0.280013865788742  | 0.714159532424614  | NA                      | aag01100 ; aag      | NA                                                     | XP_021702972.1aromatic-L-amino-acid decarboxylase isoform X1                   |
| AAEL0115f hemicentin-1                                                 | -0.15459153694421   | 0.201467138648356  | 0.634701781910801  | NA                      | NA                  | KUJ69597.1 hypothei                                    | XP_019544097.1 hemicentin-1-like                                               |
| AAEL0152f membrane alanyl aminopeptidase                               | -0.154407711457099  | 0.252411610750756  | 0.684556086619159  | NA                      | NA                  | NA                                                     | XP_021712940.1membrane alanyl aminopeptidase                                   |
| AAEL0107f alpha-2-macroglobulin receptor-associated protein            | -0.154270168862636  | 0.313321524787363  | 0.744189298893767  | NA                      | NA                  | KUJ71857.1 hypothei                                    | XP_001654906.1alpha-2-macroglobulin receptor-associated protein                |
| AAEL0210f NA                                                           | -0.154160887346463  | 0.681332578815659  | 0.914629465876247  | NA                      | NA                  | NA                                                     | XP_021703090.1beta-1,4-galactosyltransferase 2-like                            |
| AAEL0036f cytochrome b-c1 complex subunit Rieske, mitochondrial        | -0.15410277795659   | 0.280578587594515  | 0.714609510945122  | NA                      | aag01100 ; aag      | XP_019526567.1 PRE                                     | XP_001657170.1cytochrome b-c1 complex subunit Rieske, mitochondrial isoform X1 |
| AAEL0236f NA                                                           | -0.154005308211234  | 0.341435850057132  | 0.762180211699347  | NA                      | NA                  | NA                                                     | XP_021710051.1uncharacterized protein LOC5578084 isoform X1                    |
| AAEL0211f NA                                                           | -0.154001901095405  | 0.646919083370568  | 0.906554905014882  | NA                      | NA                  | NA                                                     | XP_021712767.1uncharacterized protein LOC110681316                             |
| AAEL0141f CDP-diacylglycerol-inositol 3-phosphatidyltransferase        | -0.153945250877784  | 0.209921185398179  | 0.640694775467343  | 00562 ; 00564 ; 04070   | aag01100 ; aag      | NA                                                     | XP_001648095.1CDP-diacylglycerol-inositol 3-phosphatidyltransferase            |
| AAEL0081f arrestin domain-containing protein 2                         | -0.153787765998506  | 0.725414746534075  | 0.923145691827764  | NA                      | NA                  | KUJ68733.1 hypothei                                    | XP_001659001.1arrestin domain-containing protein 2                             |
| AAEL0030f semaphorin-1A                                                | -0.153744441139774  | 0.379486644522223  | 0.785666748907449  | NA                      | NA                  | XP_019539389.1 PRE                                     | XP_021699594.1semaphorin-1A isoform X1                                         |
| AAEL0234f NA                                                           | -0.153516134459118  | 0.370801267671817  | 0.781817769662763  | NA                      | NA                  | NA                                                     | XP_021707466.1nucleolar protein 9                                              |
| AAEL0011f serine/threonine-protein kinase BRSK2                        | -0.153495575904128  | 0.70305016456379   | 0.917134620685568  | NA                      | NA                  | ETN57911.1 br serine                                   | XP_001652422.2serine/threonine-protein kinase BRSK2                            |
| AAEL0088f interference hedgehog                                        | -0.153392602378403  | 0.521559189639234  | 0.865018698932415  | NA                      | aag04341            | NA                                                     | XP_021707743.1interference hedgehog isoform X3                                 |
| AAEL0069f transcription elongation factor SPT6                         | -0.153354499653773  | 0.181747830257279  | 0.607917241925556  | NA                      | NA                  | XP_019534123.1 PRE                                     | XP_001652370.2transcription elongation factor SPT6 isoform X2                  |
| AAEL0081f arrestin domain-containing protein 2                         | -0.153231759652436  | 0.4976115796523892 | 0.856052403704179  | NA                      | XP_019534915.1 PRE  | XP_001658997.1arrestin domain-containing protein 2     |                                                                                |
| AAEL0028f tubulin beta-3 chain                                         | -0.152976038245002  | 0.399831543772696  | 0.798648539435638  | NA                      | aag04145            | KFB47389.1 AGAP01                                      | XP_019931448.1 tubulin beta-3 chain                                            |
| AAEL0003f heat shock protein 75 kDa, mitochondrial                     | -0.152908337207683  | 0.16928194780161   | 0.589323327862049  | NA                      | KUJ79416.1 hypothei | XP_001654758.1heat shock protein 75 kDa, mitochondrial |                                                                                |
| AAEL0022f uncharacterized LOC5573898                                   | -0.152811431328518  | 0.676480314068668  | 0.914438668430353  | NA                      | NA                  | KUJ78322.1 hypothei                                    | XP_019564388.1 glycine N-acyltransferase-like protein 3                        |
| AAEL0098f trypsin-1                                                    | -0.152719578193217  | 0.29662703689184   | 0.728660435561632  | NA                      | NA                  | NA                                                     | XP_019559198.1 trypsin-1                                                       |
| AAEL0000f serine protease easter                                       | -0.152683490512531  | 0.320872878430346  | 0.746566934846029  | NA                      | NA                  | AAR88077.1 serine p                                    | XP_001647873.3serine protease easter                                           |
| AAEL0020f cytochrome P450 CYP12A2                                      | -0.152656918280724  | 0.198673407547481  | 0.63193663887035   | NA                      | NA                  | KUJ75006.1 hypothei                                    | XP_021703205.1cytochrome P450 CYP12A2                                          |
| AAEL0106f NADH dehydrogenase [ubiquinone] 1 alpha subcomplex subunit 1 | -0.152460355166597  | 0.244661346827249  | 0.679772114240672  | NA                      | aag01100 ; aag      | ETN65742.1 6.3 kDa                                     | XP_001660989.2 NADH dehydrogenase [ubiquinone] 1 alpha subcomplex subunit 1    |
| AAEL0054f synaptogyrin                                                 | -0.152044539096478  | 0.67690918814204   | 0.914438668430353  | NA                      | NA                  | KUJ83740.1 hypothei                                    | XP_019539731.1 synaptogyrin 2-like                                             |
| AAEL0025f large neutral amino acids transporter small subunit 1        | -0.151964748162563  | 0.370774309319027  | 0.781817769662763  | NA                      | NA                  | KUJ81475.1 hypothei                                    | XP_021692931.1large neutral amino acids transporter small subunit 1            |
| AAEL0180f NA                                                           | -0.151863087848122  | 0.298952186813132  | 0.73047212508084   | NA                      | NA                  | NA                                                     | XP_021707598.1integrator complex subunit 7                                     |
| AAEL0116f endoribonuclease rege-1                                      | -0.151838071918208  | 0.266859772694658  | 0.702817294887306  | NA                      | NA                  | XP_019547963.1 PRE                                     | XP_021708829.1endoribonuclease rege-1 isoform X2                               |
| AAEL0228f NA                                                           | -0.151774121384556  | 0.635416760637421  | 0.902538767814767  | 04660 ; 04658           | NA                  | NA                                                     | XP_001649578.2TGF-beta-activated kinase 1 and MAP3K7-binding protein 1         |
| AAEL0025f triosephosphate isomerase                                    | -0.151671988626674  | 0.309194751408546  | 0.742274780613523  | 00051 ; 00710 ; 00010 ; | aag01100 ; aag      | KUJ81473.1 hypothei                                    | XP_001655586.1triosephosphate isomerase                                        |
| AAEL0197f NA                                                           | -0.151619873696902  | 0.168493264484927  | 0.588638960950259  | NA                      | aag04310 ; aag      | NA                                                     | XP_021703386.1casein kinase I                                                  |
| AAEL0078f mediator of RNA polymerase II transcription subunit 6        | -0.151599279014602  | 0.62195972702587   | 0.898271200863489  | NA                      | NA                  | XP_019533888.1 PRE                                     | XP_021706516.1mediator of RNA polymerase II transcription subunit 6            |
| AAEL0111f apoptosis-inducing factor 3                                  | -0.151366785584551  | 0.375667974990824  | 0.7822803136152    | NA                      | NA                  | XP_019545676.1 PRE                                     | XP_001661452.2apoptosis-inducing factor 3 isoform X1                           |
| AAEL0018f uncharacterized LOC5572818                                   | -0.151282816742998  | 0.34031245936108   | 0.761379832492257  | NA                      | NA                  | KUJ73000.1 hypothei                                    | XP_0016                                                                        |

|            |                                                                     |                    |                   |                   |              |               |                |                                                                              |                 |                                                                              |
|------------|---------------------------------------------------------------------|--------------------|-------------------|-------------------|--------------|---------------|----------------|------------------------------------------------------------------------------|-----------------|------------------------------------------------------------------------------|
| AAEL00017  | protein unc-119 homolog                                             | -0.149576692764003 | 0.732097253463332 | 0.925378973402415 | NA           | NA            | KXJ84381.1     | hypothei                                                                     | XP_001658918.2  | protein unc-119 homolog                                                      |
| AAEL00179f | uncharacterized LOC5569879                                          | -0.149536375783711 | 0.69119917242657  | 0.916122517126697 | NA           | NA            | KXJ77510.1     | hypothei                                                                     | XP_001658775.2  | uncharacterized protein LOC5569879                                           |
| AAEL0037f  | protoporphyrinogen oxidase                                          | -0.149531024629093 | 0.571233950957721 | 0.880923047085115 | 860          | aag01100; aag | KXJ82424.1     | hypothei                                                                     | XP_021693141.1  | protoporphyrinogen oxidase                                                   |
| AAEL0125c  | venom carboxylesterase-6                                            | -0.149499536111262 | 0.19455899053979  | 0.62599015068082  | NA           | NA            | KXJ68547.1     | hypothei                                                                     | XP_001656119.2  | venom carboxylesterase-6                                                     |
| AAEL0267f  | NA                                                                  | -0.149438662745909 | 0.207934351270012 | 0.639832374753494 | NA           | NA            | NA             | NA                                                                           | NA              | NA                                                                           |
| AAEL0077f  | 5-aminolevulinate synthase, nonspecific, mitochondrial              | -0.149397465714594 | 0.214643725687833 | 0.648028428468258 | 00860; 00260 | aag01100; aag | XP_019529079.1 | PRE                                                                          | XP_021710500.15 | aminolevulinate synthase, erythroid-specific, mitochondrial isoform X1       |
| AAEL0148f  | NA                                                                  | -0.149353983310933 | 0.384154630246361 | 0.790063144962496 | NA           | aag01100; aag | XP_021697512.1 | INADH dehydrogenase [ubiquinone] 1 alpha subcomplex subunit 8                | XP_021697512.1  | INADH dehydrogenase [ubiquinone] 1 alpha subcomplex subunit 8                |
| AAEL0037f  | serine/arginine repetitive matrix protein 2                         | -0.149284566632252 | 0.282596549819032 | 0.715753918648043 | NA           | NA            | XP_019526364.1 | PRE                                                                          | XP_021693203.1  | serine/arginine repetitive matrix protein 2 isoform X1                       |
| AAEL0046f  | WD repeat-containing protein 37                                     | -0.14927353452653  | 0.751139551891409 | 0.932554085844433 | NA           | NA            | KXJ81405.1     | hypothei                                                                     | XP_001649514.2  | WD repeat-containing protein 37                                              |
| AAEL0196f  | NA                                                                  | -0.149242935366748 | 0.375222651405241 | 0.782198815065306 | NA           | NA            | NA             | NA                                                                           | XP_019544559.1  | plexin-B-like                                                                |
| AAEL0138f  | nose resistant to fluoxetine protein 6                              | -0.149213626033325 | 0.393997958792957 | 0.794384140405957 | NA           | NA            | NA             | NA                                                                           | XP_021694727.1  | nose resistant to fluoxetine protein 6                                       |
| AAEL0026f  | general odorant-binding protein 56d                                 | -0.149045927570592 | 0.203606988126197 | 0.636626403204661 | NA           | NA            | AFS65329.1     | odorant                                                                      | XP_001655719.1  | general odorant-binding protein 56d                                          |
| AAEL0132f  | protein aubergine                                                   | -0.148961860760016 | 0.18664856310974  | 0.614196367514984 | NA           | aag04320      | NA             | NA                                                                           | XP_001663409.1  | protein aubergine isoform X2                                                 |
| AAEL0171f  | protein brown                                                       | -0.148924724989171 | 0.472030477100395 | 0.842604161062625 | NA           | NA            | NA             | NA                                                                           | XP_021695975.1  | protein brown                                                                |
| AAEL0213f  | NA                                                                  | -0.148867376974048 | 0.568929692782032 | 0.880635379772131 | NA           | NA            | NA             | NA                                                                           | XP_021699290.1  | zinc finger protein 91                                                       |
| AAEL0242f  | NA                                                                  | -0.148607777810118 | 0.445955609139812 | 0.828189271329869 | NA           | NA            | NA             | NA                                                                           | XP_019540191.1  | acetylcholinesterase-like                                                    |
| AAEL0129f  | NADH dehydrogenase [ubiquinone] 1 alpha subcomplex subunit 10, mito | -0.148546700410257 | 0.335757750956659 | 0.757849428425215 | NA           | aag01100; aag | XP_001663120.1 | NADH dehydrogenase [ubiquinone] 1 alpha subcomplex subunit 10, mitochondrial | XP_001663120.1  | NADH dehydrogenase [ubiquinone] 1 alpha subcomplex subunit 10, mitochondrial |
| AAEL0220f  | NA                                                                  | -0.148546354928508 | 0.35553506355524  | 0.772867683747772 | NA           | NA            | NA             | NA                                                                           | XP_001648946.1  | uncharacterized protein LOC5564600                                           |
| AAEL0008f  | F-box only protein 42                                               | -0.148514270695788 | 0.577294108311177 | 0.881961491587822 | NA           | NA            | KXJ69261.1     | hypothei                                                                     | XP_021706240.1  | F-box only protein 42                                                        |
| AAEL0143f  | uncharacterized LOC5564085                                          | -0.148451940607449 | 0.522318021130392 | 0.865018698932415 | NA           | NA            | NA             | NA                                                                           | XP_021700070.1  | uncharacterized protein LOC5564085 isoform X1                                |
| AAEL0064f  | cytochrome b5 reductase 4                                           | -0.148373323172426 | 0.622303734444003 | 0.898271200863489 | 520          | aag00520      | KXJ83737.1     | hypothei                                                                     | XP_021708928.1  | cytochrome b5 reductase 4 isoform X2                                         |
| AAEL0077f  | uncharacterized LOC5569634                                          | -0.1482813490785   | 0.333234451802833 | 0.755632763673653 | NA           | NA            | KXJ74384.1     | hypothei                                                                     | XP_019535656.1  | toll-like receptor 4                                                         |
| AAEL0080f  | uncharacterized protein C6orf136 homolog                            | -0.148196609276317 | 0.185087732938812 | 0.612420502332469 | NA           | NA            | KXJ74255.1     | hypothei                                                                     | XP_001658828.2  | uncharacterized protein C6orf136 homolog                                     |
| AAEL0195f  | NA                                                                  | -0.147968496545979 | 0.312728213112843 | 0.744058294402217 | NA           | NA            | NA             | NA                                                                           | XP_021706355.1  | uncharacterized protein LOC5567672                                           |
| AAEL0039f  | ADAM 17-like protease                                               | -0.147959457559602 | 0.582753229291793 | 0.884900200650674 | NA           | aag04330      | XP_019546802.1 | PRE                                                                          | XP_021693218.1  | ADAM 17-like protease                                                        |
| AAEL0012f  | pleckstrin homology domain-containing family G member 3             | -0.147864469947065 | 0.355063829993352 | 0.772770908922471 | NA           | NA            | KXJ81481.1     | hypothei                                                                     | XP_021696661.1  | pleckstrin homology domain-containing family G member 3                      |
| AAEL0048f  | zinc finger protein 883                                             | -0.147826895068075 | 0.539034655387356 | 0.869670565558805 | NA           | NA            | NA             | NA                                                                           | XP_001649853.2  | zinc finger protein 883                                                      |
| AAEL0116f  | DNA topoisomerase 3-beta                                            | -0.147801545612137 | 0.402160669722871 | 0.799283473604722 | NA           | aag03460; aag | KXJ84335.1     | hypothei                                                                     | XP_001655482.1  | DNA topoisomerase 3-beta                                                     |
| AAEL0054f  | PRKCA-binding protein-like                                          | -0.147698465981551 | 0.701096177107205 | 0.916795086221473 | NA           | NA            | XP_019538627.1 | PRE                                                                          | XP_021701148.1  | PRKCA-binding protein-like isoform X3                                        |
| AAEL0147f  | eukaryotic translation initiation factor 3 subunit L                | -0.147582497638842 | 0.203028128650971 | 0.635896319876174 | NA           | NA            | NA             | NA                                                                           | XP_001653862.1  | eukaryotic translation initiation factor 3 subunit L                         |
| AAEL0268f  | NA                                                                  | -0.147577697836882 | 0.2203644698831   | 0.652412844728166 | NA           | NA            | NA             | NA                                                                           | XP_021698409.1  | tripeptidyl-peptidase 2                                                      |
| AAEL0049f  | proline-rich extensin-like protein EPR1                             | -0.147317279986556 | 0.22005096256564  | 0.652412844728166 | NA           | NA            | NA             | NA                                                                           | XP_021700886.1  | protein piccolo isoform X2                                                   |
| AAEL0098f  | DNA polymerase zeta catalytic subunit                               | -0.147296139333824 | 0.408387986190266 | 0.804363495060537 | NA           | aag03460      | NA             | NA                                                                           | XP_021709936.1  | DNA polymerase zeta catalytic subunit                                        |
| AAEL0226f  | NA                                                                  | -0.147252715658444 | 0.248941045468518 | 0.681164287957569 | NA           | NA            | NA             | NA                                                                           | AAL93243.1      | larval chymotrypsin-like protein precursor                                   |
| AAEL0116f  | glycerol kinase                                                     | -0.147061398884918 | 0.474875578897716 | 0.84437941358363  | 561          | aag01100; aag | KXJ84323.1     | hypothei                                                                     | XP_001655635.2  | glycerol kinase                                                              |
| AAEL0012f  | uncharacterized LOC5569584                                          | -0.146967069861076 | 0.38499445868184  | 0.790080064171371 | NA           | NA            | KXJ7562.1      | hypothei                                                                     | XP_021698551.1  | uncharacterized protein LOC5569584                                           |
| AAEL0181f  | NA                                                                  | -0.146893006994581 | 0.271956888030176 | 0.707134016290952 | NA           | NA            | NA             | NA                                                                           | XP_021702173.1  | Imucin-5AC isoform X2                                                        |
| AAEL0183f  | NA                                                                  | -0.146502572050145 | 0.434568843388844 | 0.820960220424486 | NA           | NA            | NA             | NA                                                                           | XP_021706866.1  | tight junction protein ZO-1 isoform X12                                      |
| AAEL0252f  | NA                                                                  | -0.146386417363284 | 0.422488557831011 | 0.814192545906728 | NA           | NA            | NA             | NA                                                                           | XP_021703301.1  | probable serine/threonine-protein kinase DDB_G0267686 isoform X5             |
| AAEL0195f  | NA                                                                  | -0.146276984408329 | 0.213318417163605 | 0.646373717545434 | NA           | NA            | NA             | NA                                                                           | XP_021705402.1  | probable ubiquitin carboxyl-terminal hydrolase FAF                           |
| AAEL0019f  | ejaculatory bulb-specific protein 3                                 | -0.146145014422283 | 0.234748181157025 | 0.668737559309875 | NA           | NA            | ETN63879.1     | sensory                                                                      | XP_001660754.1  | ejaculatory bulb-specific protein 3                                          |
| AAEL0086f  | ATP-binding cassette sub-family G member 1                          | -0.146102433507069 | 0.253378560840005 | 0.685145258966747 | NA           | NA            | KXJ79717.1     | hypothei                                                                     | XP_001653357.2  | ATP-binding cassette sub-family G member 1                                   |
| AAEL0142f  | transcriptional repressor CTCF                                      | -0.146043356491841 | 0.672480335822468 | 0.912968243848131 | NA           | NA            | NA             | NA                                                                           | XP_021701525.1  | transcriptional repressor CTCF                                               |
| AAEL0040f  | 1,5-anhydro-D-fructose reductase                                    | -0.146007681436976 | 0.336193941527309 | 0.758445425575872 | NA           | aag01100; aag | KXJ83373.1     | hypothei                                                                     | XP_001648454.1  | 1,5-anhydro-D-fructose reductase                                             |
| AAEL0103f  | xanthine dehydrogenase/oxidase                                      | -0.145975293461595 | 0.159776547515448 | 0.864080211844267 | NA           | NA            | NA             | NA                                                                           | XP_021699063.1  | xanthine dehydrogenase/oxidase isoform X1                                    |
| AAEL0049f  | cullin-associated NEDD8-dissociated protein 1                       | -0.145905067049616 | 0.199585922841514 | 0.633375309392567 | NA           | NA            | KXJ83218.1     | hypothei                                                                     | XP_001650136.1  | cullin-associated NEDD8-dissociated protein 1                                |
| AAEL0198f  | NA                                                                  | -0.145804604599078 | 0.349225215379287 | 0.76724408961813  | NA           | NA            | NA             | NA                                                                           | XP_001659383.2  | angiopoietin-related protein 1                                               |
| AAEL0093f  | protein crooked neck                                                | -0.145789876583592 | 0.592147837591093 | 0.888529762455765 | NA           | aag03040      | NA             | NA                                                                           | XP_001653815.1  | protein crooked neck                                                         |
| AAEL0277f  | NA                                                                  | -0.145677510801518 | 0.608922048700861 | 0.893547770777888 | NA           | NA            | NA             | NA                                                                           | XP_021697551.1  | uncharacterized protein LOC5575002                                           |
| AAEL0151f  | phenoloxidase 2                                                     | -0.14566114339008  | 0.238734439626522 | 0.673462389161024 | NA           | NA            | NA             | NA                                                                           | XP_001650638.2  | phenoloxidase 2                                                              |
| AAEL0005f  | neural-cadherin                                                     | -0.145500399866143 | 0.39149130033712  | 0.793285          |              |               |                |                                                                              |                 |                                                                              |

|                                                                                 |                    |                   |                   |                         |                              |                                                                                                |                                                                              |
|---------------------------------------------------------------------------------|--------------------|-------------------|-------------------|-------------------------|------------------------------|------------------------------------------------------------------------------------------------|------------------------------------------------------------------------------|
| AAEL0077: uncharacterized LOC5569632                                            | -0.143092061668059 | 0.216719508100931 | 0.649748124914163 | NA                      | aag01100 ; aag               | ETN58856.1 vacuolar ABF18127.1vacuolar H+-ATPase V0 sector accessory subunit S1                |                                                                              |
| AAEL0038: vacuolar protein sorting-associated protein 11 homolog                | -0.143072843625026 | 0.449359691807658 | 0.829306073695304 | NA                      | NA                           | XP_001845273.1 vac XP_001664280.1vacuolar protein sorting-associated protein 11 homolog        |                                                                              |
| AAEL0060: tyrosine-protein phosphatase 99A                                      | -0.143059910684529 | 0.301168341748371 | 0.733161661578971 | NA                      | NA                           | XP_003436255.1 AG; XP_021710377.1tyrosine-protein phosphatase 99A isoform X1                   |                                                                              |
| AAEL0227: NA                                                                    | -0.142929642044178 | 0.68272005698911  | 0.914629465876247 | NA                      | NA                           | XP_021694929.1G1.1S-specific cyclin-D2                                                         |                                                                              |
| AAEL0084: protein expanded                                                      | -0.142662384294103 | 0.447884903936583 | 0.828929381742647 | NA                      | aag04391 ; aag               | KXJ70141.1 hypothei XP_021702721.1protein expanded                                             |                                                                              |
| AAEL0232: NA                                                                    | -0.142659703506595 | 0.414955649936312 | 0.809508847956623 | NA                      | aag04624                     | NA                                                                                             | XP_021707386.1modular serine protease                                        |
| AAEL0169: glyceraldehyde-3-phosphate dehydrogenase 1                            | -0.142602946829809 | 0.347016081732734 | 0.765398366276275 | 00710 ; 00010           | aag01100 ; aag               | NA                                                                                             | XP_011493026.1glyceraldehyde-3-phosphate dehydrogenase 1                     |
| AAEL0242: NA                                                                    | -0.142558745883466 | 0.51505080519674  | 0.861448202130317 | NA                      | NA                           | NA                                                                                             | XP_021705581.1major facilitator superfamily domain-containing protein 10     |
| AAEL0030: cell surface glycoprotein 1                                           | -0.142431972765826 | 0.717662544715619 | 0.92129137591695  | NA                      | NA                           | XP_019527887.1 PRE XP_019556163.1                                                              | proteoglycan 4-like                                                          |
| AAEL0078: nucleolar transcription factor 1-B                                    | -0.142284271366743 | 0.420415516655216 | 0.813636239562413 | NA                      | NA                           | XP_019539703.1 PRE XP_001652959.1                                                              | nucleolar transcription factor 1-B isoform X1                                |
| AAEL0183: NA                                                                    | -0.142235463312211 | 0.255487051961762 | 0.687826756042169 | NA                      | aag04391 ; aag               | NA                                                                                             | KFB49043.1AGAP000149-like protein                                            |
| AAEL0266: NA                                                                    | -0.142180043539196 | 0.20931011166721  | 0.639832374753494 | NA                      | NA                           | NA                                                                                             |                                                                              |
| AAEL0119: uncharacterized LOC5575534                                            | -0.142067748214249 | 0.605186148070758 | 0.893547770777888 | NA                      | NA                           | KXJ80958.1 hypothei                                                                            | XP_001662031.1uncharacterized protein LOC5575534                             |
| AAEL0221: NA                                                                    | -0.141962496339102 | 0.314220566664676 | 0.74451110779113  | NA                      | NA                           | XP_021713284.1uncharacterized protein LOC5574048                                               |                                                                              |
| AAEL0005: golgin subfamily A member 1                                           | -0.141943489415437 | 0.50057735829255  | 0.858585806338837 | NA                      | NA                           | KXJ79608.1 hypothei                                                                            | XP_021704706.1golgin subfamily A member 1                                    |
| AAEL0137: uncharacterized LOC5578178                                            | -0.141795008552855 | 0.291694340518987 | 0.722646576583698 | NA                      | NA                           | XP_001850009.1mitochondrial ribosomal protein L50                                              |                                                                              |
| AAEL0140: leucine-rich repeat and calponin homology domain-containing protein 1 | -0.14172713217141  | 0.524538160338125 | 0.865595409935377 | NA                      | NA                           | XP_021702017.1leucine-rich repeat and calponin homology domain-containing protein 1 isoform X2 |                                                                              |
| AAEL0199: NA                                                                    | -0.141538080014947 | 0.51610672717092  | 0.861448202130317 | NA                      | NA                           | XP_021693014.1probable G-protein coupled receptor Mth-like 5                                   |                                                                              |
| AAEL0196: NA                                                                    | -0.141389014941839 | 0.54317874240085  | 0.869900911343623 | NA                      | NA                           | XP_021694178.1uncharacterized protein LOC5564410                                               |                                                                              |
| AAEL0022: trifunctional enzyme subunit beta, mitochondrial                      | -0.141387842008437 | 0.203171731260035 | 0.635913697637701 | NA                      | aag01100 ; aag               | ETN64676.1 trifuncti                                                                           | XP_001661254.1trifunctional enzyme subunit beta, mitochondrial               |
| AAEL0072: uncharacterized LOC5568996                                            | -0.141354010053508 | 0.216695582531869 | 0.649748124914163 | NA                      | NA                           | XP_021709567.1uncharacterized protein LOC5568996                                               |                                                                              |
| AAEL0025: ATP synthase subunit delta, mitochondrial                             | -0.141313539676887 | 0.341123652089221 | 0.763584968929871 | NA                      | aag01100 ; aag               | KXJ69947.1 hypothei                                                                            | XP_011492970.2ATP synthase subunit delta, mitochondrial                      |
| AAEL0056: ER degradation-enhancing alpha-mannosidase-like protein 2             | -0.14093675466316  | 0.310977568305328 | 0.742918550320373 | NA                      | aag04141                     | KXJ72842.1 hypothei                                                                            | XP_001651175.2ER degradation-enhancing alpha-mannosidase-like protein 2      |
| AAEL0060: uncharacterized LOC5567390                                            | -0.140913888128191 | 0.538483833135251 | 0.866700945213732 | NA                      | NA                           | XP_001863002.1 con XP_001651792.1                                                              | uncharacterized protein LOC5567390                                           |
| AAEL0254: NA                                                                    | -0.140834715447608 | 0.511057367190991 | 0.860521480858463 | NA                      | NA                           | KFB46449.1AGAP008115-like protein                                                              |                                                                              |
| AAEL0196: NA                                                                    | -0.140544093028071 | 0.28978832349761  | 0.721952579380462 | NA                      | NA                           | XP_021693829.1rho GTPase-activating protein 7                                                  |                                                                              |
| AAEL0001: uncharacterized LOC5570041                                            | -0.14028820768569  | 0.233127063847256 | 0.666962220912214 | NA                      | NA                           | KXJ74850.1 hypothei                                                                            | XP_021710662.1uncharacterized protein LOC5570041 isoform X1                  |
| AAEL0002: ninjurin-2                                                            | -0.140216263691803 | 0.393123046092867 | 0.793953421864587 | NA                      | NA                           | XP_001868860.1 con XP_019550234.1                                                              | ninjurin-2                                                                   |
| AAEL0242: NA                                                                    | -0.14014769908918  | 0.707315130417819 | 0.91797784850989  | NA                      | NA                           | XP_021695702.1zinc finger protein 62 homolog isoform X1                                        |                                                                              |
| AAEL0129: protein real-time                                                     | -0.140019068952489 | 0.314187737508096 | 0.74451110779113  | NA                      | NA                           | XP_021702626.1protein real-time isoform X2                                                     |                                                                              |
| AAEL0105: glutathione S-transferase D7                                          | -0.139909504531553 | 0.700560944412229 | 0.916629842461068 | NA                      | NA                           | XP_001654620.1glutathione S-transferase D7 isoform X1                                          |                                                                              |
| AAEL0014: uncharacterized LOC5570730                                            | -0.139796635213195 | 0.56037915706116  | 0.87800595572912  | NA                      | NA                           | XP_021699542.1uncharacterized protein LOC5570730 isoform X5                                    |                                                                              |
| AAEL0055: WD repeat-containing protein 20                                       | -0.139746369581514 | 0.574472256553598 | 0.881197098237279 | NA                      | NA                           | XP_001869611.1 wd XP_021706625.1                                                               | WD repeat-containing protein 20 isoform X1                                   |
| AAEL0256: NA                                                                    | -0.139422432207634 | 0.314158991049778 | 0.74451110779113  | NA                      | aag03018                     | NA                                                                                             | XP_021709456.1heat shock 70 kDa protein cognate 5                            |
| AAEL0115: serine-rich adhesin for platelets                                     | -0.139402727960829 | 0.529492010618073 | 0.866201863414668 | NA                      | NA                           | XP_308189.4 AGAP0                                                                              | XP_021696040.1uncharacterized protein LOC5577804 isoform X3                  |
| AAEL0031: RING finger protein nh1-                                              | -0.13933711507023  | 0.200031195090802 | 0.633719317230304 | NA                      | NA                           | KXJ81642.1 hypothei                                                                            | XP_021696339.1RING finger protein nh1- isoform X1                            |
| AAEL0062: galactosylgalactosylxylosylprotein 3-beta-glucuronosyltransferase P   | -0.139326426805017 | 0.327543510156785 | 0.750517197932987 | NA                      | aag00514                     | XP_001849080.1 gali; XP_021704958.1                                                            | galactosylgalactosylxylosylprotein 3-beta-glucuronosyltransferase P          |
| AAEL0045: uncharacterized LOC5564989                                            | -0.139301209357421 | 0.222046006956568 | 0.654118491874251 | NA                      | NA                           | KXJ78987.1 hypothei                                                                            | XP_001649339.1uncharacterized protein LOC5564989                             |
| AAEL0008: uncharacterized LOC5567237                                            | -0.139267485370105 | 0.560561289927035 | 0.87800595572912  | NA                      | aag04214 ; aag               | KXJ69249.1 hypothei                                                                            | XP_021710103.1uncharacterized protein LOC5567237 isoform X1                  |
| AAEL0063: apyrase                                                               | -0.139166177324355 | 0.403731893097978 | 0.800429773232221 | NA                      | AAV90659.1 salivary P50635.2 | RecNA: Full=APyrase; AltName: Full=ATP-diphosphatase; Short=ADPase;                            |                                                                              |
| AAEL0043: general odorant-binding protein 99b                                   | -0.139011441779353 | 0.323619522489051 | 0.74762391301976  | NA                      | NA                           | KXJ80864.1 hypothei                                                                            | XP_001648935.2general odorant-binding protein 99b                            |
| AAEL0150: NA                                                                    | -0.138919022149419 | 0.372274258217531 | 0.781817769662763 | NA                      | aag04120                     | NA                                                                                             | XP_021700150.1E3 SUMO-protein ligase PIAS2 isoform X1                        |
| AAEL0019: probable cytochrome P450 12a4, mitochondrial                          | -0.138872837278393 | 0.394172746958756 | 0.794388401303915 | NA                      | NA                           | XP_019551560.1 PRE XP_001660726.1                                                              | probable cytochrome P450 12a4, mitochondrial isoform X1                      |
| AAEL0080: clavesin-1                                                            | -0.138652893402116 | 0.574768745439456 | 0.881197098237279 | NA                      | NA                           | ETN63206.1 hypothe                                                                             | XP_019527183.1 clavesin-1-like                                               |
| AAEL0090: uncharacterized LOC5571429                                            | -0.138593218429167 | 0.310852347925239 | 0.742918550320373 | NA                      | aag00190                     | ETN66750.1 lethal 3: XP_001842154.1                                                            | lethal 3SDI                                                                  |
| AAEL0079: MOB kinase activator-like 2                                           | -0.138554068173957 | 0.209430027467673 | 0.639832374753494 | NA                      | NA                           | XP_001658720.2                                                                                 | MOB kinase activator-like 2 isoform X3                                       |
| AAEL0256: NA                                                                    | -0.138460184608511 | 0.43540777143271  | 0.820960220424486 | NA                      | NA                           | XP_021713351.1                                                                                 | phosphatidylglycerophosphatase and protein-tyrosine phosphatase 1 isoform X2 |
| AAEL0006: leucine-rich repeat-containing protein 15                             | -0.138452321441552 | 0.248360790877055 | 0.68058844480365  | NA                      | NA                           | KXJ71375.1 hypothei                                                                            | XP_001649809.2leucine-rich repeat-containing protein 15                      |
| AAEL0029: histone-lysine N-methyltransferase setd3                              | -0.138077004024257 | 0.566051431039552 | 0.880302387766415 | NA                      | NA                           | KXJ77697.1 hypothei                                                                            | XP_021710443.1histone-lysine N-methyltransferase setd3                       |
| AAEL0215: NA                                                                    | -0.13786766531989  | 0.349688882755697 | 0.767801448844281 | NA                      | NA                           | NA                                                                                             |                                                                              |
| AAEL0001: phosphatidylinositol 4-kinase alpha                                   | -0.137832811833027 | 0.241960062759014 | 0.676752734804998 | NA                      | aag01100 ; aag               | NA                                                                                             | XP_001658919.2phosphatidylinositol 4-kinase alpha isoform X6                 |
| AAEL0032: proteasome assembly chaperone 4                                       | -0.137742860937457 | 0.481472812428429 | 0.846648733033901 | NA                      | NA                           | XP_019531585.1 PRE XP_021702242.1                                                              | proteasome assembly chaperone 4 isoform X2                                   |
| AAEL0063: NA                                                                    | -0.137731676888963 | 0.459900280251972 | 0.834169795839746 | NA                      | NA                           | KXJ72006.1 hypothei                                                                            | XP_001651958.2sphingomyelin phosphodiesterase                                |
| AAEL0195: NA                                                                    | -0.137725223760032 | 0.496959289798126 | 0.855889834310753 | NA                      | NA                           | XP_021708811.1uncharacterized protein LOC5567165                                               |                                                                              |
| AAEL0068: succinate--CoA ligase [ADP/GDP-forming] subunit alpha, mitochondrial  | -0.137511452601781 | 0.292571773407598 | 0.723512283028756 | 00640 ; 00720 ; 00660 ; | aag01100 ; aag               | ETN59000.1 Succinyl XP_001652258.1                                                             | succinate--CoA ligase [ADP/GDP-forming] subunit alpha, mitochondrial         |
| AAEL0023: esterase B1                                                           | -0.137509284705335 | 0.556803493100222 | 0.876835490527944 | NA                      | NA                           | XP_001841715.1 carl XP_001655125.2                                                             | esterase B1                                                                  |
| AAEL0076: uncharacterized LOC5569483                                            | -0.137471056631973 | 0.633094483609183 | 0.902506916959539 | NA                      | NA                           | KFB47851.1 AGAP00                                                                              | KFB47851.1AGAP000961-like                                                    |

|                                                                                         |                    |                   |                    |     |                |                                      |                                                                                             |
|-----------------------------------------------------------------------------------------|--------------------|-------------------|--------------------|-----|----------------|--------------------------------------|---------------------------------------------------------------------------------------------|
| AAEL01951 NA                                                                            | -0.135522548694955 | 0.282518724751367 | 0.715753918648043  | NA  | NA             | NA                                   | XP_021693504.1sodium/calcium exchanger 1 isoform X1                                         |
| AAEL00131 RNA-binding protein 1                                                         | -0.135447017373771 | 0.251682132649872 | 0.684556086619159  | NA  | NA             | XP_001687957.1 AG                    | XP_001653077.1RNA-binding protein 1 isoform X2                                              |
| AAEL02681 NA                                                                            | -0.135214368157219 | 0.384763051200656 | 0.790080064171371  | NA  | aag03022       | NA                                   | XP_021695542.1transcription initiation factor TFIID subunit 4 isoform X1                    |
| AAEL00671 TBC1 domain family member 4                                                   | -0.135190012819297 | 0.338619433502559 | 0.760778306749309  | NA  | NA             | XP_019543414.1 PRE                   | XP_021710017.1TBC1 domain family member 4 isoform X3                                        |
| AAEL00421 leucine-rich repeat-containing protein 20                                     | -0.135151857067346 | 0.492945877124232 | 0.852167567405069  | NA  | NA             | KFB52829.1 AGAP00                    | XP_001648693.1leucine-rich repeat-containing protein 20 isoform X1                          |
| AAEL00451 uncharacterized LOC5565067                                                    | -0.135007061277397 | 0.578108333823108 | 0.882214409260404  | NA  | NA             | KFB52574.1 AGAP00                    | KFB52574.1.AGAP001400-like protein                                                          |
| AAEL00021 methenyltetrahydrofolate synthase domain-containing protein                   | -0.134931687186804 | 0.245001923088518 | 0.679772114240672  | NA  | NA             | XP_001846943.1 con                   | XP_021699647.1methenyltetrahydrofolate synthase domain-containing protein                   |
| AAEL01351 cyclin-K                                                                      | -0.134913097703795 | 0.694081473880841 | 0.916122517126697  | NA  | NA             | NA                                   | XP_019555082.1 cyclin-K                                                                     |
| AAEL01981 NA                                                                            | -0.134774297485447 | 0.477417655324391 | 0.845011493487133  | NA  | aag03015       | NA                                   | XP_021708774.1RNA-binding protein Musashi homolog Rbp6 isoform X1                           |
| AAEL02401 NA                                                                            | -0.134695931565794 | 0.593342923878781 | 0.88852962455765   | NA  | NA             | XP_021700516.1contactin-2 isoform X2 |                                                                                             |
| AAEL00121 probable NADH dehydrogenase [ubiquinone] iron-sulfur protein 6, mitochondrial | -0.134679228790546 | 0.324777809500152 | 0.748164514778316  | NA  | aag01100 ; aag | ETN66177.1 NADH de                   | XP_001658304.1probable NADH dehydrogenase [ubiquinone] iron-sulfur protein 6, mitochondrial |
| AAEL00021 zinc finger protein 224                                                       | -0.134666739340999 | 0.704875021521385 | 0.917749125552377  | NA  | NA             | KXJ71625.1 hypothei                  | XP_001654819.1zinc finger protein 224                                                       |
| AAEL00201 golgin-84                                                                     | -0.134663942826562 | 0.453986430205739 | 0.832617462606238  | NA  | NA             | KFB40557.1 AGAP00                    | XP_019560514.1 golgin-84                                                                    |
| AAEL00111 protein sprint                                                                | -0.134524358224611 | 0.348263488974192 | 0.766929259132545  | NA  | NA             | KXJ80612.1 hypothei                  | XP_021710682.1protein sprint isoform X1                                                     |
| AAEL02581 NA                                                                            | -0.134486770725707 | 0.672421275510828 | 0.912897695079764  | NA  | NA             | NA                                   | NA                                                                                          |
| AAEL01301 uncharacterized LOC5577194                                                    | -0.134258274761767 | 0.29568815544555  | 0.72751936000266   | NA  | NA             | NA                                   | XP_021695013.1uncharacterized protein LOC5577194                                            |
| AAEL00061 zinc finger protein 436                                                       | -0.134177683841082 | 0.485013849686577 | 0.847655581875201  | NA  | NA             | ETN63243.1 zinc fing                 | XP_021710531.1zinc finger protein 436                                                       |
| AAEL01441 eukaryotic initiation factor 4A-III                                           | -0.134100930374358 | 0.346402272351493 | 0.765398366276275  | NA  | aag03013 ; aag | NA                                   | XP_001648723.1eukaryotic initiation factor 4A-III                                           |
| AAEL01371 NADH dehydrogenase [ubiquinone] iron-sulfur protein 4, mitochondrial          | -0.134082166404264 | 0.253523104410104 | 0.685145258966747  | NA  | aag01100 ; aag | NA                                   | XP_001663929.2NADH dehydrogenase [ubiquinone] iron-sulfur protein 4, mitochondrial          |
| AAEL01341 uncharacterized LOC5577938                                                    | -0.133995022038324 | 0.613187630235768 | 0.895501122588404  | NA  | NA             | NA                                   | KFB36464.1.AGAP013121-like protein                                                          |
| AAEL00731 protein yellow                                                                | -0.133948154246633 | 0.24379190750687  | 0.678781583321699  | NA  | NA             | KFB45517.1 AGAP01                    | XP_001652709.2protein yellow                                                                |
| AAEL00691 synapse-associated protein of 47 kDa                                          | -0.133937910821672 | 0.465579308136568 | 0.838483018891546  | NA  | NA             | NA                                   | XP_021706918.1synapse-associated protein of 47 kDa isoform X4                               |
| AAEL00741 protein Gawkly                                                                | -0.133921319514867 | 0.420270708794289 | 0.813636239562413  | NA  | NA             | KXJ72981.1 hypothei                  | XP_001652769.2protein Gawkly                                                                |
| AAEL00781 cGMP-dependent protein kinase, isozyme 2 forms cD4/T1/T3A/T3B                 | -0.133853697111141 | 0.239505642361578 | 0.67449511186165   | NA  | NA             | KFB43052.1 cgm-p-d                   | XP_021700790.1cGMP-dependent protein kinase, isozyme 2 forms cD4/T1/T3A/T3B isoform X2      |
| AAEL00121 engulfment and cell motility protein 1                                        | -0.133818991001352 | 0.616429425499794 | 0.897164966956308  | NA  | NA             | KFB42915.1 AGAP00                    | XP_001658311.1engulfment and cell motility protein 1                                        |
| AAEL00261 DNA repair and recombination protein RAD54-like                               | -0.133749185166765 | 0.667762839976437 | 0.912418872165226  | NA  | aag03440       | XP_001848380.1 DN                    | XP_001661961.1DNA repair and recombination protein RAD54-like                               |
| AAEL01111 NA                                                                            | -0.133628603775067 | 0.329116401585282 | 0.752367596512046  | NA  | NA             | KXJ69682.1 hypothei                  | XP_019547683.1 G protein alpha i subunit                                                    |
| AAEL00611 another transcription unit protein                                            | -0.133603154218726 | 0.36978966307645  | 0.781817769662763  | NA  | NA             | KXJ80250.1 hypothei                  | XP_021704529.1another transcription unit protein                                            |
| AAEL01401 NA                                                                            | -0.133490011441039 | 0.532811296612869 | 0.866700945213732  | 970 | aag00970       | NA                                   | XP_001648027.2valine-tRNA ligase                                                            |
| AAEL00761 embryonic polarity protein dorsal                                             | -0.133485198583032 | 0.232487829399338 | 0.666707644289445  | NA  | aag04624       | XP_019540833.1 PRE                   | XP_001652840.2embryonic polarity protein dorsal isoform X4                                  |
| AAEL00151 neurogenic locus notch homolog protein 1                                      | -0.133390530463797 | 0.25442518037821  | 0.686571057876479  | NA  | NA             | KXJ81775.1 hypothei                  | XP_021695905.1neurogenic locus notch homolog protein 1                                      |
| AAEL00741 protein transport protein Sec23A                                              | -0.133354695441521 | 0.260027877990354 | 0.69315658530205   | NA  | aag04141       | XP_001846775.1 tra                   | XP_001652784.1protein transport protein Sec23A isoform X1                                   |
| AAEL00941 general odorant-binding protein 83a                                           | -0.133319936991738 | 0.597078468417229 | 0.889911899315825  | NA  | NA             | NA                                   | XP_001660077.1general odorant-binding protein 83a                                           |
| AAEL00541 transient receptor potential protein                                          | -0.133287506585707 | 0.38537559098226  | 0.790599650772731  | NA  | aag04745       | KXJ76346.1 hypothei                  | XP_001650890.2transient receptor potential protein isoform X1                               |
| AAEL01961 NA                                                                            | -0.133185174431726 | 0.282853820237193 | 0.715753918648043  | NA  | NA             | NA                                   | XP_021709718.1sodium-dependent neutral amino acid transporter B(0)AT3 isoform X2            |
| AAEL00641 sodium-coupled monocarboxylate transporter 1                                  | -0.133134925778251 | 0.429343178299026 | 0.817466568737354  | NA  | NA             | KXJ77184.1 hypothei                  | XP_001651974.1sodium-coupled monocarboxylate transporter 1                                  |
| AAEL01381 glucosamine-6-phosphate isomerase                                             | -0.133098647226007 | 0.425375223196494 | 0.81462346465531   | NA  | aag01100 ; aag | NA                                   | XP_021703325.1glucosamine-6-phosphate isomerase                                             |
| AAEL00911 probable cytochrome P450 6a14                                                 | -0.133071793937488 | 0.449197248910547 | 0.829306073695304  | NA  | 520            | AAF97937.1 cytochr                   | XP_001653673.1probable cytochrome P450 6a14                                                 |
| AAEL02041 NA                                                                            | -0.133007728762506 | 0.296936484801301 | 0.729225922909414  | NA  | NA             | NA                                   | XP_021700063.1pheromone-processing carboxypeptidase KEX1 isoform X2                         |
| AAEL01161 exosome complex exonuclease RRP44                                             | -0.132878309962669 | 0.521244997880488 | 0.864991501344855  | NA  | aag03018       | XP_001845598.1 mit                   | XP_001655640.2exosome complex exonuclease RRP44                                             |
| AAEL01131 prostaglandin reductase 1                                                     | -0.132876504208304 | 0.610290628605353 | 0.894250694972366  | NA  | NA             | KXJ82523.1 hypothei                  | XP_021694721.1prostaglandin reductase 1                                                     |
| AAEL02351 NA                                                                            | -0.132818168832812 | 0.538783520092206 | 0.869670565558805  | NA  | NA             | NA                                   | XP_001651551.2uncharacterized protein LOC5567124                                            |
| AAEL00831 NA                                                                            | -0.132807249146503 | 0.325773190121792 | 0.748896673349414  | NA  | NA             | NA                                   | XP_021692980.1afadin isoform X1                                                             |
| AAEL02601 NA                                                                            | -0.132622458844559 | 0.700021071505439 | 0.916629842641068  | NA  | NA             | NA                                   | XP_021699815.1uncharacterized protein LOC110676395 isoform X1                               |
| AAEL00881 boIA-like protein 3                                                           | -0.13261809522924  | 0.45135160491326  | 0.830666499866364  | NA  | NA             | KXJ75042.1 hypothei                  | XP_001659581.1boIA-like protein 3                                                           |
| AAEL00091 protein ECT2                                                                  | -0.132391145551047 | 0.463096939557262 | 0.83726493413983   | NA  | NA             | XP_019931396.1 PRE                   | XP_021695571.1protein ECT2 isoform X1                                                       |
| AAEL02801 NA                                                                            | -0.13237766212504  | 0.656925683916257 | 0.909239283244833  | NA  | NA             | NA                                   | XP_021703456.1zinc finger protein 184-like                                                  |
| AAEL00761 solute carrier organic anion transporter family member 1C1                    | -0.132372694325427 | 0.568038682957996 | 0.880422457819946  | NA  | NA             | KXJ84224.1 hypothei                  | XP_021700472.1solute carrier organic anion transporter family member 1C1                    |
| AAEL01131 low density lipoprotein receptor adapter protein 1-A                          | -0.132311073547309 | 0.334588214614369 | 0.757087156181969  | NA  | aag04144       | KXJ75852.1 hypothei                  | XP_001662631.1low density lipoprotein receptor adapter protein 1-A                          |
| AAEL00341 39S ribosomal protein L15, mitochondrial                                      | -0.132111566662775 | 0.396181092373109 | 0.796693358396638  | NA  | aag03010       | KXJ69300.1 hypothei                  | XP_001656814.239S ribosomal protein L15, mitochondrial                                      |
| AAEL00461 band 4.1-like protein 5                                                       | -0.132100212220441 | 0.540832444030384 | 0.869735874782513  | NA  | NA             | XP_001847268.1 bar                   | XP_021694131.1band 4.1-like protein 5                                                       |
| AAEL02501 NA                                                                            | -0.132041746842458 | 0.378258950079104 | 0.78478947842763   | NA  | aag03013 ; aag | NA                                   | XP_021705972.1protein SEC13 homolog                                                         |
| AAEL00671 BLOC-1-related complex subunit 7                                              | -0.13198183228315  | 0.605158916869986 | 0.893547770777888  | NA  | NA             | KFB37818.1 AGAP01                    | XP_001658037.1BLOC-1-related complex subunit 7 isoform X1                                   |
| AAEL00781 uncharacterized LOC5569727                                                    | -0.131895554172196 | 0.586002547254919 | 0.885305440788009  | NA  | NA             | KXJ70891.1 hypothei                  | XP_001652948.1uncharacterized protein LOC5569727                                            |
| AAEL01031 phosphotriesterase-related protein                                            | -0.131799355685598 | 0.383072200608845 | 0.788887121770344  | NA  | NA             | NA                                   | XP_001654444.1phosphotriesterase-related protein                                            |
| AAEL00961 opsin, ultraviolet-sensitive                                                  | -0.131636495463067 | 0.245861476466043 | 0.6797727114240672 | NA  | NA             | NA                                   | XP_021698798.1opsin, ultraviolet-sensitive                                                  |
| AAEL00141 ethanolaninephosphotransferase 1                                              | -0.131625899540798 | 0.504897346249341 | 0.858744381072989  | NA  | aag01100 ; aag | KXJ80976.1 hypothei                  | XP_001653396.1ethanolaninephosphotransferase 1                                              |
| AAEL01421 innexin shaking-B                                                             | -0.131606213764814 | 0.570792602049368 | 0.880923047085115  | NA  | NA             | NA                                   | XP_001647835.1innexin shaking-B isoform X5                                                  |
| AAEL02781 NA                                                                            | -0.131562464490588 | 0.602014017575069 | 0.892353896540881  | NA  | NA             | NA                                   | XP_021701400.1RIP-like protein                                                              |
| AAEL01261 40S ribosomal protein S23                                                     | -0.131540424546765 | 0.36293554419219  | 0.778129747823051  | NA  | aag03010       | ETN58508.1 hypothe                   | XP_001656190.140S ribosomal protein S23                                                     |
| AAEL00811 protein mab-21                                                                | -0.131539219633245 | 0.645141505712383 | 0.906554905014882  | NA  | NA             | KFB48871.1 AGAP00                    | XP_001653106.2protein mab-21                                                                |
| AAEL01321 protein FAM173B                                                               | -0.13137047125919  | 0.505143810852916 | 0.858744381072989  | NA  | NA             | NA                                   | XP_001663417.2protein FAM173B                                                               |

|                                                                  |                    |                   |                   |                         |                |                      |                                                                                                 |
|------------------------------------------------------------------|--------------------|-------------------|-------------------|-------------------------|----------------|----------------------|-------------------------------------------------------------------------------------------------|
| AAEL0231f NA                                                     | -0.129614482895219 | 0.307857538608292 | 0.740435198712364 | NA                      | aag03015       | NA                   | XP_021713081.1serine/threonine-protein phosphatase 2A 56 kDa regulatory subunit epsilon isoform |
| AAEL0196f NA                                                     | -0.12960841798538  | 0.539039788737845 | 0.86967056558805  | NA                      | NA             | NA                   | XP_021706738.1regulating synaptic membrane exocytosis protein 1 isoform X1                      |
| AAEL0085f oxysterol-binding protein-related protein 11           | -0.129595947740427 | 0.630114241296305 | 0.902180060433888 | NA                      | NA             | KXJ68940.1 hypothe   | XP_001653312.1oxysterol-binding protein-related protein 11                                      |
| AAEL0004f uncharacterized LOC5577360                             | -0.129357431529779 | 0.318945515876538 | 0.745684464362801 | NA                      | NA             | XP_0018444380.1 con  | XP_001656438.1uncharacterized protein LOC5577360                                                |
| AAEL0102f NA                                                     | -0.129249167816762 | 0.302745421061006 | 0.735250294168217 | NA                      | NA             | NA                   | XP_001660703.2venom allergen 5 isoform X1                                                       |
| AAEL0218f NA                                                     | -0.129145996374242 | 0.269691924258198 | 0.705750472775923 | NA                      | aag04142       | NA                   | XP_021702253.1CD63 antigen                                                                      |
| AAEL0016f uncharacterized LOC5571644                             | -0.128991057988167 | 0.612062954961535 | 0.895007422182805 | NA                      | NA             | KXJ80722.1 hypothe   | XP_001653735.2uncharacterized protein LOC5571644                                                |
| AAEL0196f NA                                                     | -0.1288947174528   | 0.42860656641872  | 0.816740033999805 | NA                      | NA             | NA                   | XP_021699703.1probable serine/threonine-protein kinase DDB_G0282963 isoform X4                  |
| AAEL0195f NA                                                     | -0.128846015810372 | 0.326306462536706 | 0.748982805752749 | NA                      | NA             | NA                   | XP_001657110.2titin homolog isoform X2                                                          |
| AAEL0244f NA                                                     | -0.128727407318055 | 0.484613278605595 | 0.847655581875201 | NA                      | aag01100 ; aag | NA                   | XP_021695522.1chondroitin sulfate synthase 1 isoform X1                                         |
| AAEL0104f ets DNA-binding protein pokkuri                        | -0.128715038059661 | 0.540139653348312 | 0.869709828277711 | NA                      | aag04013 ; aag | NA                   | XP_021703673.1ets DNA-binding protein pokkuri                                                   |
| AAEL0135f phosphatidylinositol 3-kinase regulatory subunit alpha | -0.128680538288385 | 0.344776703645665 | 0.764706052029763 | NA                      | NA             | NA                   | XP_021697483.1phosphatidylinositol 3-kinase regulatory subunit alpha isoform X2                 |
| AAEL0074f protein phosphatase inhibitor 2                        | -0.128675176940041 | 0.258058265942146 | 0.691310673420561 | NA                      | NA             | KXJ72634.1 hypothe   | XP_001658336.1protein phosphatase inhibitor 2 isoform X2                                        |
| AAEL0260f NA                                                     | -0.128663312608252 | 0.50390804061966  | 0.858744381072989 | NA                      | aag04080       | NA                   | XP_021700696.15-hydroxytryptamine receptor 2B                                                   |
| AAEL0089f forkhead box protein K1                                | -0.128607288786518 | 0.274991399792968 | 0.710808916282197 | NA                      | NA             | XP_001845339.1 con   | XP_021696531.1forkhead box protein K1                                                           |
| AAEL0129f CCR4-NOT transcription complex subunit 3               | -0.128518389198826 | 0.328522978650094 | 0.751633130168613 | NA                      | aag03018       | NA                   | XP_021702628.1CCR4-NOT transcription complex subunit 3 isoform X2                               |
| AAEL0019f actin-1                                                | -0.128428462338002 | 0.285461425021792 | 0.717970179170389 | NA                      | aag04145 ; aag | ETN60496.1 actin [Ar | P49128.2RecName: Full=Actin-1; Flags: Precursor                                                 |
| AAEL0195f NA                                                     | -0.12839269053808  | 0.288957462895369 | 0.721217831038796 | NA                      | NA             | NA                   | XP_021704918.1protein split ends isoform X3                                                     |
| AAEL0011f magnesium transporter NIPA2                            | -0.128325653569561 | 0.397791487697349 | 0.797539006884967 | NA                      | NA             | KXJ72370.1 hypothe   | XP_001658166.2magnesium transporter NIPA2                                                       |
| AAEL0148f 17-beta-hydroxysteroid dehydrogenase 13                | -0.128273513558049 | 0.66986429811898  | 0.912812708172959 | NA                      | NA             | NA                   | XP_001649748.117-beta-hydroxysteroid dehydrogenase 13                                           |
| AAEL0052f TOM1-like protein Z                                    | -0.128212414583013 | 0.3864803267262   | 0.791367050591446 | NA                      | NA             | XP_019539041.1 PRE   | XP_001650612.1TOM1-like protein 2 isoform X2                                                    |
| AAEL0028f polymerase-2                                           | -0.128149672754049 | 0.465388410966771 | 0.838483018891546 | NA                      | NA             | KXJ71145.1 hypothe   | XP_019537145.1 serine protease 53-like                                                          |
| AAEL0277f NA                                                     | -0.127913834881385 | 0.719293350369802 | 0.921583569204186 | NA                      | NA             | NA                   | NA                                                                                              |
| AAEL0212f NA                                                     | -0.12785444633858  | 0.294174780458448 | 0.724764746928686 | NA                      | NA             | NA                   | XP_021699961.1sex determination protein fruitless isoform X1                                    |
| AAEL0276f NA                                                     | -0.127486890622857 | 0.357159400448256 | 0.773736338358957 | NA                      | NA             | NA                   | XP_021709351.1ATP-binding cassette sub-family G member 4                                        |
| AAEL0134f beta-parvin                                            | -0.127345921174931 | 0.376898916704913 | 0.783277809573714 | NA                      | NA             | NA                   | XP_019527949.1 beta-parvin                                                                      |
| AAEL0234f NA                                                     | -0.127313537800681 | 0.585219270669067 | 0.885224865991869 | NA                      | NA             | NA                   | XP_021696580.1uncharacterized protein LOC110675563                                              |
| AAEL0008f tetratricopeptide repeat protein 36 homolog            | -0.127259737449239 | 0.549383263589112 | 0.873281187000692 | NA                      | NA             | KXJ82047.1 hypothe   | XP_001651638.2tetratricopeptide repeat protein 36 homolog                                       |
| AAEL0086f probable cytochrome P450 49a1                          | -0.127248767389355 | 0.422394728599018 | 0.814192545906728 | NA                      | NA             | XP_001841736.1 Cyt   | XP_001659378.1probable cytochrome P450 49a1                                                     |
| AAEL0078f xaa-Pro aminopeptidase Apep                            | -0.127221326316444 | 0.360688392440662 | 0.77528862253545  | NA                      | NA             | XP_001866008.1 xaa   | XP_001652979.2xaa amino-peptidase Apep                                                          |
| AAEL0045f 28S ribosomal protein S7, mitochondrial                | -0.127137532064099 | 0.521420110623768 | 0.864991501344855 | NA                      | aag03010       | ETN61601.1 mitocho   | XP_001649336.128S ribosomal protein S7, mitochondrial                                           |
| AAEL0107f sodium/potassium-transporting ATPase subunit beta-2    | -0.12698047109338  | 0.278560789877264 | 0.713122992430066 | NA                      | NA             | KXJ72578.1 hypothe   | XP_001654893.1sodium/potassium-transporting ATPase subunit beta-2                               |
| AAEL0093f neuronal membrane glycoprotein M6-a                    | -0.126954214874692 | 0.351633910063592 | 0.769131267032369 | NA                      | NA             | NA                   | XP_021710762.1neuronal membrane glycoprotein M6-a isoform X1                                    |
| AAEL0146f protein C12orf4 homolog                                | -0.126746677984116 | 0.700579903970951 | 0.916629842641068 | NA                      | NA             | NA                   | XP_001649155.2protein C12orf4 homolog                                                           |
| AAEL0107f ATP-dependent RNA helicase dbp2                        | -0.126384232744404 | 0.412279434784221 | 0.806884477085645 | NA                      | aag03040       | KXJ84012.1 hypothe   | XP_001654897.1ATP-dependent RNA helicase dbp2                                                   |
| AAEL0206f NA                                                     | -0.1263530842011   | 0.485773404131203 | 0.847790841886424 | 04151 ; 05165 ; 04714 ; | aag03015       | NA                   | XP_021704389.1serine/threonine-protein kinase Smg1                                              |
| AAEL0097f CCAAT/enhancer-binding protein gamma                   | -0.126336151558512 | 0.510919523381822 | 0.860452247709668 | NA                      | NA             | NA                   | XP_001660303.2CCAAT/enhancer-binding protein gamma                                              |
| AAEL0002f uncharacterized LOC5573751                             | -0.126322307093937 | 0.37343457531575  | 0.782192290591489 | NA                      | NA             | KXJ81838.1 hypothe   | XP_001654779.2uncharacterized protein LOC5573751                                                |
| AAEL0099f uncharacterized LOC5572710                             | -0.126226169487516 | 0.770809624181329 | 0.941147080452193 | NA                      | NA             | NA                   | XP_001660530.2uncharacterized protein LOC5572710                                                |
| AAEL0122f protein obstructor-E                                   | -0.126171785613354 | 0.649751682646954 | 0.90663577761678  | NA                      | NA             | KXJ77304.1 hypothe   | XP_001662353.1protein obstructor-E                                                              |
| AAEL0003f zinc-type alcohol dehydrogenase-like protein C1773.06c | -0.125721563908084 | 0.418568954906096 | 0.813275237129623 | NA                      | NA             | XP_019543236.1 PRE   | XP_021702288.1zinc-type alcohol dehydrogenase-like protein C1773.06c isoform X1                 |
| AAEL0081f 3-oxoacyl-[acyl-carrier-protein] reductase FabG        | -0.125678793738738 | 0.414484297996937 | 0.808925664934849 | NA                      | NA             | KXJ74733.1 hypothe   | XP_001659009.1uncharacterized protein LOC5570230                                                |
| AAEL0074f transcription factor Oub                               | -0.125669261565446 | 0.731778477938425 | 0.925260275963946 | NA                      | NA             | KXJ69978.1 hypothe   | XP_021698961.1transcription factor Oub                                                          |
| AAEL0032f GATA zinc finger domain-containing protein 8           | -0.125577666411458 | 0.582985508446259 | 0.884917975521096 | NA                      | NA             | KXJ73643.1 hypothe   | XP_001663551.2GATA zinc finger domain-containing protein 8                                      |
| AAEL0021f uricase                                                | -0.125535504785512 | 0.278017560498596 | 0.713122992430066 | 00232 ; 00230           | aag01100 ; aag | KXJ80084.1 hypothe   | ABV44610.1urate oxidase                                                                         |
| AAEL0252f NA                                                     | -0.125398601842645 | 0.316565820962354 | 0.745684464362801 | NA                      | NA             | NA                   | XP_019531735.1 protein chiffon                                                                  |
| AAEL0014f transcription elongation factor S-II                   | -0.125364517098414 | 0.326187553443214 | 0.748896673349414 | NA                      | NA             | KXJ79286.1 hypothe   | XP_021700677.1transcription elongation factor S-II isoform X1                                   |
| AAEL0140f ketimine reductase mu-crystallin                       | -0.125315356196284 | 0.64231639024998  | 0.905763856274616 | NA                      | NA             | NA                   | XP_001664232.2ketimine reductase mu-crystallin                                                  |
| AAEL0000f glycosylated lysosomal membrane protein                | -0.1252818972122   | 0.411719628166398 | 0.806720047134699 | NA                      | NA             | XP_001867233.1 con   | XP_021706130.1glycosylated lysosomal membrane protein                                           |
| AAEL0006f transmembrane protein 64                               | -0.125205578301278 | 0.432904330802331 | 0.820005280371151 | NA                      | NA             | ETN63239.1 hypothe   | XP_001649773.1transmembrane protein 64                                                          |
| AAEL0113f NADH-ubiquinone oxidoreductase 49 kDa subunit          | -0.125203401013534 | 0.359744558610101 | 0.774255626424296 | NA                      | aag01100 ; aag | ETN63841.1 NADH-u    | XP_001655316.1NADH-ubiquinone oxidoreductase 49 kDa subunit                                     |
| AAEL0082f uncharacterized LOC5570369                             | -0.125036115629914 | 0.585145354316502 | 0.885224865991869 | NA                      | NA             | XP_019530512.1 PRE   | XP_019530512.1 protein split ends isoform X1                                                    |
| AAEL0051f 39S ribosomal protein L42, mitochondrial               | -0.125015085695283 | 0.321515385170871 | 0.746588710355934 | NA                      | NA             | KFB48545.1 AGAPO0    | XP_001650495.139S ribosomal protein L42, mitochondrial                                          |
| AAEL0025f anosmin-1                                              | -0.124939028978495 | 0.406688254025972 | 0.803250764873792 | NA                      | NA             | NA                   | XP_021713410.1anosmin-1 isoform X3                                                              |
| AAEL0064f serine/threonine-protein kinase 40                     | -0.124879094141981 | 0.398756367479848 | 0.798554100881298 | 04151 ; 05165 ; 04714 ; | NA             | ETN58900.1 hypothe   | XP_001657826.1serine/threonine-protein kinase 40                                                |
| AAEL0091f cytochrome P450 6d3                                    | -0.124816210563705 | 0.30645709786205  | 0.738783696372872 | NA                      | NA             | XP_019538136.1 PRE   | XP_001653690.1cytochrome P450 6d3                                                               |
| AAEL0278f NA                                                     | -0.124771515933623 | 0.311588795926284 | 0.743434862302544 | NA                      | NA             | NA                   | XP_021704550.1potassium channel subfamily K member 18 isoform X2                                |
| AAEL0153f lipase 1                                               | -0.124724717991171 | 0.487171188505674 | 0.848846          |                         |                |                      |                                                                                                 |

|                                                                     |                    |                    |                   |                      |                |                |                                                   |                                                        |                                                                      |
|---------------------------------------------------------------------|--------------------|--------------------|-------------------|----------------------|----------------|----------------|---------------------------------------------------|--------------------------------------------------------|----------------------------------------------------------------------|
| AAEL0044: RAB6A-GEF complex partner protein 2                       | -0.12307757959914  | 0.621389966741176  | 0.898072950204539 | NA                   | NA             | KXJ74676.1     | hypothei                                          | XP_001649210.1                                         | RAB6A-GEF complex partner protein 2                                  |
| AAEL0110: ficolin-1                                                 | -0.122929631372695 | 0.3092677145047    | 0.742274780613523 | NA                   | NA             | AAAR88166.1    | aslectin                                          | XP_019546605.1                                         | ficolin-1-like                                                       |
| AAEL0245: NA                                                        | -0.122891494724678 | 0.379846024761082  | 0.785823543132077 | NA                   | NA             | NA             | NA                                                | XP_021696415.1                                         | unconventional myosin-Vb isoform X2                                  |
| AAEL0274: NA                                                        | -0.122725711934298 | 0.292854312566892  | 0.723631099647605 | NA                   | aag04140; aag  | NA             | NA                                                | XP_021697929.1                                         | inositol 1,4,5-trisphosphate receptor isoform X4                     |
| AAEL0254: NA                                                        | -0.122724545460244 | 0.387391786330021  | 0.791825725928371 | NA                   | NA             | NA             | NA                                                | XP_019540899.1                                         | nesprin-1                                                            |
| AAEL0067: ATP-binding cassette sub-family B member 7, mitochondrial | -0.12260386692607  | 0.361069975976174  | 0.77557561132884  | NA                   | aag02010       | KXJ83060.1     | hypothei                                          | XP_001652166.1                                         | ATP-binding cassette sub-family B member 7, mitochondrial isoform X2 |
| AAEL0065: muscle segmentation homeobox                              | -0.122489591918225 | 0.70283206832626   | 0.917106722424789 | NA                   | XP_019556240.1 | PRE            | XP_021710128.1                                    | muscle segmentation homeobox isoform X1                |                                                                      |
| AAEL0141: probable ATP-dependent RNA helicase DHX35                 | -0.122483686346361 | 0.308959294757338  | 0.74192156324557  | NA                   | NA             | NA             | NA                                                | XP_001648145.2                                         | ceramide phosphoethanolamine synthase                                |
| AAEL0032: cell division cycle protein 23 homolog                    | -0.122317116360646 | 0.596125707000096  | 0.889500365788046 | NA                   | aag04120       | ETN60860.1     | anapha:                                           | XP_001656619.1                                         | cell division cycle protein 23 homolog                               |
| AAEL0034: RNA-binding protein 24-A                                  | -0.122050029519526 | 0.287158547829276  | 0.718902142868179 | NA                   | NA             | CRK95562.1     | CLUMA_                                            | XP_001656804.2                                         | RNA-binding protein 24-A                                             |
| AAEL0182: NA                                                        | -0.121857881189543 | 0.339753943541048  | 0.761379832492257 | NA                   | NA             | NA             | NA                                                | XP_021707407.1                                         | zinc finger protein hangover                                         |
| AAEL0197: NA                                                        | -0.121831785958709 | 0.344378342368225  | 0.764706052029763 | NA                   | NA             | NA             | NA                                                | XP_021711018.1                                         | lmucin-5AC isoform X1                                                |
| AAEL0234: NA                                                        | -0.121694016149368 | 0.534291597223866  | 0.866700945213732 | NA                   | NA             | NA             | NA                                                | XP_021704811.1                                         | conserved oligomeric Golgi complex subunit 1                         |
| AAEL0078: uncharacterized LOC5569697                                | -0.121693721702659 | 0.69634636283346   | 0.916122517126697 | NA                   | NA             | KXJ74652.1     | hypothei                                          | XP_001658685.2                                         | uncharacterized protein LOC5569697                                   |
| AAEL0186: NA                                                        | -0.121669177954613 | 0.29229904520596   | 0.723436206020777 | NA                   | NA             | NA             | NA                                                | XP_021696694.1                                         | uncharacterized protein LOC5576943 isoform X12                       |
| AAEL0122: protein unc-80 homolog                                    | -0.12158434472453  | 0.574743801459932  | 0.881197098233729 | NA                   | XP_019549143.1 | PRE            | XP_021708233.1                                    | protein unc-80 homolog isoform X1                      |                                                                      |
| AAEL0014: intersectin-1                                             | -0.121581262091401 | 0.383129762814924  | 0.788887121770344 | NA                   | XP_019529461.1 | PRE            | XP_021700599.1                                    | intersectin-1 isoform X1                               |                                                                      |
| AAEL0173: glutamic acid-rich protein                                | -0.12148411646682  | 0.670156360732783  | 0.912812708172959 | NA                   | NA             | NA             | NA                                                | XP_021706305.1                                         | glutamate acid-rich protein                                          |
| AAEL0197: NA                                                        | -0.121442281667369 | 0.338720791431419  | 0.760778306749309 | NA                   | NA             | NA             | NA                                                | XP_001651766.1                                         | cytochrome c oxidase subunit 7A1, mitochondrial-like                 |
| AAEL0022: bromodomain-containing protein 7                          | -0.121426011066591 | 0.579357084205205  | 0.882283691803025 | NA                   | NA             | XP_019551397.1 | PRE                                               | XP_001654928.2                                         | bromodomain-containing protein 7 isoform X1                          |
| AAEL0237: NA                                                        | -0.12137260388745  | 0.744768376903135  | 0.931365937538534 | NA                   | NA             | NA             | NA                                                | XP_021693684.1                                         | uncharacterized protein LOC110674159                                 |
| AAEL0233: NA                                                        | -0.12129975096749  | 0.421020551861247  | 0.813840460658889 | NA                   | NA             | NA             | NA                                                | XP_021697637.1                                         | mitochondrial thiamine pyrophosphate carrier                         |
| AAEL0124: nuclear pore complex protein Nup133                       | -0.12128532784245  | 0.609173341628895  | 0.893547777077788 | NA                   | aag03013       | XP_001847396.1 | NuJ_                                              | XP_001662611.1                                         | nuclear pore complex protein Nup133                                  |
| AAEL0117: nascent polypeptide-associated complex subunit alpha      | -0.121177467259896 | 0.325623669489819  | 0.748896673349414 | NA                   | NA             | XP_001850614.1 | nas                                               | XP_001655652.1                                         | nascent polypeptide-associated complex subunit alpha                 |
| AAEL0008: GPI mannosyltransferase 4                                 | -0.12116484449488  | 0.65188857230041   | 0.907241152999219 | NA                   | aag00563       | KXJ82747.1     | hypothei                                          | XP_001651650.2                                         | GPI mannosyltransferase 4                                            |
| AAEL0124: NA                                                        | -0.121066076454171 | 0.44621294122902   | 0.828189271329869 | NA                   | NA             | KXJ84388.1     | hypothei                                          | XP_021702660.1                                         | zinc finger SWIM domain-containing protein 8                         |
| AAEL0080: protein aubergine                                         | -0.120958464491997 | 0.5012127333663655 | 0.858744381072989 | NA                   | aag04320       | KXJ68003.1     | hypothei                                          | XP_001653082.1                                         | protein aubergine                                                    |
| AAEL0023: aspartate aminotransferase, mitochondrial                 | -0.120938563133721 | 0.319290402044425  | 0.745684464362801 | 00960; 00401; 00360; | aag01100; aag  | XP_001848088.1 | asp                                               | XP_001655159.1                                         | aspartate aminotransferase, mitochondrial                            |
| AAEL0027: serine protease inhibitor 42D                             | -0.120876555644201 | 0.552663520378066  | 0.874531710113044 | NA                   | XP_00173358.1  | hypothei       | XP_001662188.1                                    | serine protease inhibitor 42D                          |                                                                      |
| AAEL0037: uncharacterized LOC5578862                                | -0.120798948823792 | 0.655045328702741  | 0.908200559699054 | NA                   | NA             | KXJ77949.1     | hypothei                                          | XP_001664071.2                                         | uncharacterized protein LOC5578862                                   |
| AAEL0035: uncharacterized LOC5578489                                | -0.120612327976678 | 0.577863217816542  | 0.784189745229548 | NA                   | NA             | KXJ77664.1     | hypothei                                          | XP_001663876.2                                         | uncharacterized protein LOC5578489                                   |
| AAEL0044: cyclin-dependent kinases regulatory subunit               | -0.120565919872493 | 0.60759055334588   | 0.893547770777888 | NA                   | NA             | ETN59287.1     | cyclin-d:                                         | XP_001649286.1                                         | cyclin-dependent kinases regulatory subunit                          |
| AAEL0196: NA                                                        | -0.120444965399194 | 0.370267653108754  | 0.781817769662763 | NA                   | NA             | NA             | NA                                                | EAT47226.1                                             | AAEL001659                                                           |
| AAEL0138: cleavage stimulation factor subunit 2 tau variant         | -0.120419603140003 | 0.514794978118261  | 0.861448202130317 | NA                   | aag03015       | XP_001664044.1 | cleavage stimulation factor subunit 2 tau variant |                                                        |                                                                      |
| AAEL0085: glutamate [NMDA] receptor subunit 1                       | -0.120385797317869 | 0.475299779181252  | 0.84437941358363  | NA                   | aag04080       | ETN60916.1     | hypothei                                          | XP_021705513.1                                         | glutamate [NMDA] receptor subunit 1                                  |
| AAEL0132: ubiquitin carboxyl-terminal hydrolase CYLD                | -0.120332770580277 | 0.319884789087122  | 0.746140719770603 | NA                   | aag04013       | XP_021702790.1 | ubiquitin carboxyl-terminal hydrolase CYLD        |                                                        |                                                                      |
| AAEL0061: exocyst complex component 4                               | -0.120286536088489 | 0.400349701763476  | 0.798648539435638 | NA                   | NA             | XP_019554641.1 | PRE                                               | XP_021704211.1                                         | exocyst complex component 4 isoform X2                               |
| AAEL0109: serine-rich adhesin for platelets                         | -0.120217928642664 | 0.478225413407888  | 0.845416382162313 | NA                   | XP_0277264.1   | hypothei       | XP_021698430.1                                    | uncharacterized protein LOC5574157                     |                                                                      |
| AAEL0145: protein Wnt-5                                             | -0.119991668274032 | 0.704368235489598  | 0.917749125552377 | NA                   | aag04150; aag  | NA             | NA                                                | XP_021700182.1                                         | protein Wnt-5                                                        |
| AAEL0030: merozoite surface antigen 2, allelic form 2               | -0.11997537807909  | 0.317595785455858  | 0.745684464362801 | NA                   | XP_019543580.1 | PRE            | XP_001663089.2                                    | merozoite surface antigen 2, allelic form 2 isoform X2 |                                                                      |
| AAEL0250: NA                                                        | -0.119966971011961 | 0.355145422064022  | 0.772770908922471 | NA                   | NA             | NA             | NA                                                | XP_021696636.1                                         | serine/arginine repetitive matrix protein 5 isoform X6               |
| AAEL0048: NA                                                        | -0.119789599847579 | 0.685315266793522  | 0.914629465876247 | NA                   | NA             | XP_001868508.1 | con                                               | XP_001649892.2                                         | uncharacterized protein LOC5565533                                   |
| AAEL0083: cleavage and polyadenylation specificity factor subunit 1 | -0.119709429862026 | 0.434548310049615  | 0.820960202444886 | NA                   | aag03015       | KXJ75685.1     | hypothei                                          | XP_021710072.1                                         | cleavage and polyadenylation specificity factor subunit 1            |
| AAEL0025: thioredoxin domain-containing protein 5 homolog           | -0.119652458838022 | 0.332526928640877  | 0.755231182999982 | NA                   | aag04141       | XP_019526297.1 | PRE                                               | XP_001655446.2                                         | thioredoxin domain-containing protein 5 homolog                      |
| AAEL0039: guanine nucleotide-binding protein G(s) subunit alpha     | -0.119611817647414 | 0.370664249304029  | 0.781817769662763 | NA                   | NA             | CRK92729.1     | CLUMA_                                            | XP_019565130.1                                         | guanine nucleotide-binding protein G(s) subunit alpha                |
| AAEL0008: phosphatidylinositol 4,5-bisphosphate 5-phosphatase 4     | -0.119519348150252 | 0.37691307767794   | 0.783277809573714 | NA                   | aag01100; aag  | XP_019537941.1 | PRE                                               | XP_021710311.1                                         | phosphatidylinositol 4,5-bisphosphate 5-phosphatase 4 isoform X1     |
| AAEL0043: chorion peroxidase-like                                   | -0.119507740363181 | 0.531923236068519  | 0.866700945213732 | 940                  | NA             | KXJ75129.1     | hypothei                                          | XP_001649031.3                                         | chorion peroxidase-like                                              |
| AAEL0076: protein KRTCAP2 homolog                                   | -0.11946731230905  | 0.482375641081793  | 0.846941547268585 | NA                   | NA             | KXJ83500.1     | hypothei                                          | XP_001658521.1                                         | protein KRTCAP2 homolog                                              |
| AAEL0039: PHD and RING finger domain-containing protein 1           | -0.119451247402962 | 0.325335474636154  | 0.748808663732339 | NA                   | NA             | KXJ74304.1     | hypothei                                          | XP_021706346.1                                         | PHD and RING finger domain-containing protein 1                      |
| AAEL0099: ras-related protein Rab-8A                                | -0.119416646707184 | 0.540046194754718  | 0.86970982877711  | NA                   | NA             | NA             | NA                                                | XP_001660517.1                                         | ras-related protein Rab-8A                                           |
| AAEL0005: fibulin-1                                                 | -0.119380569874371 | 0.335572208917708  | 0.757775574591595 | NA                   | NA             | XP_019931033.1 | PRE                                               | XP_021709534.1                                         | fibulin-2 isoform X2                                                 |
| AAEL0256: NA                                                        | -0.11926179300182  | 0.349094157806261  | 0.767244408961813 | NA                   | NA             | NA             | NA                                                | XP_021704114.1                                         | integrin alpha1 isoform X2                                           |
| AAEL0203: NA                                                        | -0.118914985460339 | 0.692374516596763  | 0.916122517126697 | NA                   | NA             | NA             | NA                                                | XP_019525569.1                                         | cadherin-86C-like                                                    |
| AAEL0196: NA                                                        | -0.118893837029352 | 0.552934979799277  | 0.874531710113044 | NA                   | NA             | NA             | NA                                                | XP_021705229.1                                         | protein winged eye                                                   |
| AAEL0104: protein NRDE2 homolog                                     | -0.118867700674368 | 0.6954501645183    | 0.916122517126697 | NA                   | NA             | NA             | NA                                                | XP_001660842.2                                         | protein NRDE2 homolog                                                |
| AAEL0116: helicase POLQ-like                                        | -0.118759181939796 | 0.66704254446263   |                   |                      |                |                |                                                   |                                                        |                                                                      |

|                                                                                |                    |                    |                   |                            |                    |                                                              |                                                                                                 |
|--------------------------------------------------------------------------------|--------------------|--------------------|-------------------|----------------------------|--------------------|--------------------------------------------------------------|-------------------------------------------------------------------------------------------------|
| AAEL0196f NA                                                                   | -0.116282005750746 | 0.352172684662316  | 0.769212685559608 | NA                         | NA                 | NA                                                           | XP_021707629.1muscleblind-like protein 2a isoform X2                                            |
| AAEL0000i 40S ribosomal protein S6                                             | -0.116249268247078 | 0.414016188693584  | 0.808526521298463 | NA                         | aag03010; aag      | XP_019544926.1 PRE                                           | XP_001647931.140S ribosomal protein S6                                                          |
| AAEL0058f uncharacterized LOC5567125                                           | -0.116184237093471 | -0.159871323555235 | 0.86408021844267  | NA                         | NA                 | KXJ70029.1 hypothe                                           | XP_001651549.2uncharacterized protein LOC5567125                                                |
| AAEL0199f NA                                                                   | -0.116177797353221 | 0.320620374039301  | 0.746545719106691 | 00480; 00460; 00430        | aag01100; aag      | NA                                                           | XP_021704350.1gamma-glutamyltranspeptidase 1 isoform X3                                         |
| AAEL0003f isoleucine--tRNA ligase, cytoplasmic                                 | -0.116051643774687 | 0.343040355262777  | 0.76358426442382  | 970                        | aag00970           | XP_019539964.1 PRE                                           | XP_001656071.2isoleucine--tRNA ligase, cytoplasmic                                              |
| AAEL0104f vesicular acetylcholine transporter                                  | -0.116048709215606 | 0.688173398511076  | 0.916010156153545 | NA                         | NA                 | NA                                                           | XP_021713001.1vesicular acetylcholine transporter                                               |
| AAEL0274f NA                                                                   | -0.115975385692688 | 0.477642545188299  | 0.845011493487133 | NA                         | NA                 | NA                                                           | XP_021702884.1tyrosine-protein phosphatase non-receptor type 21 isoform X1                      |
| AAEL0005f apyrase                                                              | -0.115866658693695 | 0.340300742219548  | 0.761379832492257 | NA                         | NA                 | KXJ77401.1 hypothe                                           | XP_019551817.1 apyrase-like                                                                     |
| AAEL0145f pleckstrin homology domain-containing family F member 1 homolog      | -0.115754581676851 | 0.344209760553542  | 0.764706052029763 | NA                         | NA                 | NA                                                           | XP_021700187.1pleckstrin homology domain-containing family F member 1 homolog                   |
| AAEL0239f NA                                                                   | -0.115739993717488 | 0.36684062394536   | 0.780578423384551 | NA                         | NA                 | NA                                                           | XP_021694223.1uncharacterized protein LOC110674263                                              |
| AAEL0137f serine/threonine-protein kinase Genghis Khan                         | -0.115724043381432 | 0.370670908618922  | 0.781817769662763 | 04151; 05165; 04714; 04714 | aag                | NA                                                           | XP_021711533.1serine/threonine-protein kinase Genghis Khan isoform X1                           |
| AAEL0202f NA                                                                   | -0.115712257567241 | 0.384680771466174  | 0.790080064171371 | NA                         | aag04310           | NA                                                           | XP_021695067.1adenomatous polyposis coli protein-like                                           |
| AAEL0012f RNA pseudouridylate synthase domain-containing protein 2             | -0.115631323881122 | 0.521830173620559  | 0.865018698932415 | NA                         | NA                 | XP_019550549.1 PRE                                           | XP_021702395.1RNA pseudouridylate synthase domain-containing protein 2 isoform X1               |
| AAEL0230f NA                                                                   | -0.115601517655331 | 0.279395760792449  | 0.713604060506006 | NA                         | aag03013           | NA                                                           | XP_021705605.1eukaryotic translation initiation factor 4 gamma 2                                |
| AAEL0099f uncharacterized LOC5572603                                           | -0.115599860701165 | 0.353602048494375  | 0.770323402046695 | NA                         | NA                 | NA                                                           | XP_021694172.1uncharacterized protein LOC5572603                                                |
| AAEL0094f titin                                                                | -0.115286339410256 | 0.345588598006913  | 0.764941296190615 | NA                         | NA                 | NA                                                           | XP_001660084.2titin isoform X2                                                                  |
| AAEL0002f uncharacterized LOC5570040                                           | -0.11511900240449  | 0.345161097671957  | 0.764941296190615 | NA                         | NA                 | AAV90667.1 putative                                          | XP_001658170.1vago protein                                                                      |
| AAEL0199f NA                                                                   | -0.115035388429464 | 0.505169366686402  | 0.85744381072989  | NA                         | NA                 | NA                                                           | XP_021707873.1homeobox protein cut isoform X3                                                   |
| AAEL0081f ATP-binding cassette sub-family B member 6, mitochondrial            | -0.11497946836303  | 0.317118188672842  | 0.745684464362801 | NA                         | aag02010           | KXJ75945.1 hypothe                                           | XP_001658950.2ATP-binding cassette sub-family B member 6, mitochondrial                         |
| AAEL0034f arf-GAP with SH3 domain, ANK repeat and PH domain-containing protein | -0.114931565559986 | 0.530588546414023  | 0.866691320214768 | NA                         | aag04144           | KXJ78574.1 hypothe                                           | XP_021695658.1arf-GAP with SH3 domain, ANK repeat and PH domain-containing protein 2 isoform X1 |
| AAEL0086f cytochrome c oxidase subunit 5B, mitochondrial                       | -0.114763443702656 | 0.432354027583575  | 0.820005280371151 | aag01100; aag              | ETN61530.1 cytochr | XP_000166320.1cytochrome c oxidase subunit 5B, mitochondrial |                                                                                                 |
| AAEL0001f 4-coumarate--CoA ligase 1                                            | -0.114741766018256 | 0.520886800281533  | 0.864960891721031 | NA                         | NA                 | ETN61533.1 AMP de                                            | XP_001657682.14-coumarate--CoA ligase 1                                                         |
| AAEL0236f NA                                                                   | -0.11462873373416  | 0.567103912422593  | 0.880302387766415 | NA                         | aag03022           | NA                                                           | XP_021712143.1 transcription initiation factor TFIID subunit 1-like                             |
| AAEL0057f uncharacterized LOC5566967                                           | -0.114457705414865 | 0.584619754077046  | 0.885175928718656 | NA                         | NA                 | AHG94988.1 allatost                                          | XP_001651381.1uncharacterized protein LOC5566967                                                |
| AAEL0039f calpain-B                                                            | -0.114331318828615 | 0.506584051725349  | 0.859256178927183 | NA                         | NA                 | KXJ74454.1 hypothe                                           | XP_019552580.1 calpain-B-like                                                                   |
| AAEL0066f melanization protease 1                                              | -0.114294640528703 | 0.37683861608288   | 0.783277809573714 | NA                         | NA                 | KXJ78669.1 hypothe                                           | XP_001657945.2melanization protease 1                                                           |
| AAEL0068f muscle-specific protein 20                                           | -0.114111676602264 | 0.313771146496235  | 0.74451110779113  | NA                         | NA                 | KFB49782.1 AGAP01                                            | XP_001652273.1muscle-specific protein 20                                                        |
| AAEL0059f actin, indirect flight muscle                                        | -0.114066147876172 | 0.454144499999148  | 0.832617462606238 | NA                         | NA                 | XP_001862810.1 acti                                          | XP_001651744.2actin, indirect flight muscle                                                     |
| AAEL0067f tryptophan--tRNA ligase, mitochondrial                               | -0.113892319905518 | 0.573295174179419  | 0.881197098233729 | 970                        | aag00970           | KXJ72729.1 hypothe                                           | XP_001658036.2tryptophan--tRNA ligase, mitochondrial                                            |
| AAEL0088f succinate dehydrogenase cytochrome b560 subunit, mitochondrial       | -0.113844738629339 | 0.414973482468237  | 0.809508847956623 | NA                         | aag01100; aag      | KFB74587.1 AGAP01                                            | XP_001653486.1succinate dehydrogenase cytochrome b560 subunit, mitochondrial                    |
| AAEL0197f NA                                                                   | -0.113825677728127 | 0.396268800410934  | 0.796693358396638 | NA                         | NA                 | NA                                                           | XP_001651542.2uncharacterized protein LOC5567141                                                |
| AAEL0139f serine protease inhibitor 28Dc                                       | -0.113787356019651 | 0.316399412616544  | 0.745684464362801 | NA                         | NA                 | NA                                                           | XP_011493764.2serine protease inhibitor 28Dc isoform X6                                         |
| AAEL0061f fatty-acid amide hydrolase 2-A                                       | -0.113783275451315 | 0.409519673336588  | 0.805356078572463 | 970                        | NA                 | KXJ70534.1 hypothe                                           | XP_001651825.1fatty-acid amide hydrolase 2-B isoform X1                                         |
| AAEL0213f NA                                                                   | -0.113712436493285 | 0.609325392483291  | 0.893547707777888 | NA                         | NA                 | NA                                                           | XP_021703738.1protein sickle-like                                                               |
| AAEL0025f hamartin                                                             | -0.113668907414068 | 0.382080124295899  | 0.788141964530569 | NA                         | aag04150; aag      | KXJ70671.1 hypothe                                           | XP_019556098.1 hamartin                                                                         |
| AAEL0033f transcription factor mef2A                                           | -0.113529160165625 | 0.464071218566868  | 0.837274753622609 | NA                         | NA                 | XP_019527763.1 PRE                                           | XP_021704564.1transcription factor mef2A isoform X1                                             |
| AAEL0064f very-long-chain 3-oxoacyl-CoA reductase                              | -0.113366632168118 | 0.763086366802861  | 0.937631292204557 | NA                         | NA                 | KXJ75332.1 hypothe                                           | XP_001651985.1very-long-chain 3-oxoacyl-CoA reductase                                           |
| AAEL0128f tubulin gamma-1 chain                                                | -0.113005064667406 | 0.592582293027884  | 0.888529762455765 | NA                         | NA                 | NA                                                           | XP_001662960.1tubulin gamma-1 chain                                                             |
| AAEL0084f 60S ribosomal protein L18                                            | -0.112949680870249 | 0.422598520610995  | 0.814192545906728 | NA                         | aag03010           | KFB37602.1 60S ribo                                          | XP_001659268.160S ribosomal protein L18 isoform X2                                              |
| AAEL0026f tryptase                                                             | -0.112924134793345 | 0.358502537201665  | 0.773854174836904 | NA                         | NA                 | XP_019531785.1 PRE                                           | XP_019546316.1 serine protease 44-like                                                          |
| AAEL0231f NA                                                                   | -0.1128556850674   | 0.417981755064577  | 0.812788254564712 | NA                         | NA                 | NA                                                           | XP_021705794.1serine/arginine repetitive matrix protein 2-like isoform X1                       |
| AAEL0271f NA                                                                   | -0.112827288435402 | 0.736433658131439  | 0.927293722242795 | NA                         | NA                 | NA                                                           | XP_001659919.1protein Peter pan                                                                 |
| AAEL0065f ubiquitin-60S ribosomal protein L40                                  | -0.112800658822919 | 0.469102962344547  | 0.840476140867313 | NA                         | aag03010           | KRT80223.1 ribosom                                           | XP_021704564.1ribosomal protein L40, isoform A                                                  |
| AAEL0012f protein transport protein Sec24A                                     | -0.112536039779058 | 0.345388260842573  | 0.764941296190615 | NA                         | aag04141           | ETN65321.1 transpo                                           | XP_001652901.1protein transport protein Sec24A                                                  |
| AAEL0060f probable histone-lysine N-methyltransferase CG1716                   | -0.112496671564555 | 0.527798563429545  | 0.865973876319045 | 310                        | aag01100; aag      | KXJ75251.1 hypothe                                           | XP_021706896.1probable histone-lysine N-methyltransferase CG1716                                |
| AAEL0083f chromosome transmission fidelity protein 18 homolog                  | -0.112352653601598 | 0.648834014825909  | 0.906554905014882 | NA                         | NA                 | XP_019549816.1 PRE                                           | XP_001659131.2chromosome transmission fidelity protein 18 homolog                               |
| AAEL0010f integrator complex subunit 6                                         | -0.112336946197094 | 0.509258857986517  | 0.860083070787677 | NA                         | NA                 | KXJ75550.1 hypothe                                           | XP_001657984.1integrator complex subunit 6                                                      |
| AAEL0032f membrane-bound alkaline phosphatase                                  | -0.112265565393219 | 0.345949541172886  | 0.765136884941381 | 00790; 00730               | aag01100; aag      | KXJ70901.1 hypothe                                           | XP_001663535.2membrane-bound alkaline phosphatase                                               |
| AAEL0221f NA                                                                   | -0.112234182836387 | 0.477591066721581  | 0.845011493487133 | NA                         | aag03010           | NA                                                           | XP_021708362.160S ribosomal protein L3                                                          |
| AAEL0129f 28S ribosomal protein S24, mitochondrial                             | -0.11219617461938  | 0.403711544647608  | 0.800429773232221 | NA                         | NA                 | NA                                                           | XP_001663109.228S ribosomal protein S24, mitochondrial                                          |
| AAEL0111f uncharacterized LOC5574456                                           | -0.112088172143349 | 0.506158078909465  | 0.858744381072989 | NA                         | NA                 | KXJ68452.1 hypothe                                           | XP_001661471.2uncharacterized protein LOC5574456                                                |
| AAEL0264f NA                                                                   | -0.11208549184382  | 0.543157597503521  | 0.869900911343623 | 230                        | aag01100; aag      | NA                                                           | XP_021713067.1Ca(2+)/calmodulin-responsive adenylate cyclase isoform X1                         |
| AAEL0244f NA                                                                   | -0.111858702751377 | 0.324563751291726  | 0.748164514778316 | NA                         | NA                 | NA                                                           | XP_019531346.1 interaptin-like isoform X5                                                       |
| AAEL0229f NA                                                                   | -0.111830567881094 | 0.553179528720435  | 0.874531710113044 | NA                         | NA                 | NA                                                           | NA                                                                                              |
| AAEL0009f calcium channel flower                                               | -0.11182816560383  | 0.319131413914853  | 0.745684464362801 | NA                         | NA                 | KXJ78031.1 hypothe                                           | XP_001657464.1calcium channel flower isoform X1                                                 |
| AAEL0280f NA                                                                   | -0.111813905802835 | 0.344219258247735  | 0.764706052029763 | 480                        | aag01100; aag      | NA                                                           | XP_021694071.1glutathione-specific gamma-glutamylcyclotransferase 1                             |
| AAEL0210f NA                                                                   | -0.111742          |                    |                   |                            |                    |                                                              |                                                                                                 |

|                                                                                    |                     |                   |                    |                      |               |                     |                                                                                                         |
|------------------------------------------------------------------------------------|---------------------|-------------------|--------------------|----------------------|---------------|---------------------|---------------------------------------------------------------------------------------------------------|
| AAEL0199f NA                                                                       | -0.109292908761712  | 0.44722810886679  | 0.828502725039167  | NA                   | NA            | NA                  | XP_021709814.1probable Ras GTPase-activating protein isoform X4                                         |
| AAEL0078f spondin-1                                                                | -0.109279615315974  | 0.366691837425656 | 0.780578423384551  | NA                   | NA            | KXJ72335.1 hypothe  | XP_019565470.1 spondin-1-like                                                                           |
| AAEL0260f NA                                                                       | -0.109258092440891  | 0.566772546543485 | 0.880302387766415  | NA                   | NA            | NA                  | XP_021695025.1protein AF-9                                                                              |
| AAEL0230f NA                                                                       | -0.109091609580841  | 0.74641022368516  | 0.931365937538534  | NA                   | NA            | NA                  | KFB50624.1AGAP007129-like protein                                                                       |
| AAEL0010f 5-formylglutathione hydrolase                                            | -0.109066786774068  | 0.554327014884368 | 0.875297464116348  | 680                  | aag01100; aag | KXJ73792.1 hypothe  | XP_001657864.15-formylglutathione hydrolase                                                             |
| AAEL0150f DDB1- and CUL4-associated factor 6                                       | -0.108952901439915  | 0.362776402827706 | 0.777968109579947  | NA                   | NA            | NA                  | XP_021694829.1DDB1- and CUL4-associated factor 6                                                        |
| AAEL0047f enoyl-CoA delta isomerase 1, mitochondrial                               | -0.108887623854915  | 0.32608532998155  | 0.748896673349414  | NA                   | aag00071      | KXJ75516.1 hypothe  | XP_001649724.2enoyl-CoA delta isomerase 1, mitochondrial                                                |
| AAEL0128f uncharacterized LOC5576918                                               | -0.108881620709996  | 0.635193775501688 | 0.902538767814767  | NA                   | NA            | NA                  | ABF18231.1predicted acetyltransferase                                                                   |
| AAEL00018f sepiapterin reductase                                                   | -0.108612510076006  | 0.562276976794782 | 0.87919672735184   | 790                  | aag01100; aag | KXJ77214.1 hypothe  | XP_021700839.1sepiapterin reductase                                                                     |
| AAEL0080f NADH-quinone oxidoreductase subunit B 2-like                             | -0.108575314593022  | 0.37407076725287  | 0.782198815065306  | NA                   | aag01100; aag | XP_001869339.1 NAI  | XP_001869339.1NADH dehydrogenase iron-sulfur protein 7, mitochondrial                                   |
| AAEL0243f NA                                                                       | -0.108488260338525  | 0.654187292334256 | 0.907635089858856  | NA                   | NA            | NA                  | XP_021703445.1zinc finger protein 37 homolog isoform X1                                                 |
| AAEL0137f protein farnesyltransferase/geranylgeranyltransferase type-1 subunit alp | -0.108416151570203  | 0.423407181896141 | 0.814192545906728  | NA                   | aag00900      | NA                  | XP_021706173.1protein farnesyltransferase/geranylgeranyltransferase type-1 subunit alpha                |
| AAEL0095f uncharacterized LOC5572135                                               | -0.108349707904814  | 0.772723148457322 | 0.941230906070349  | NA                   | NA            | NA                  | XP_001660211.2uncharacterized protein LOC5572135 isoform X4                                             |
| AAEL0135f transcription factor grauzone                                            | -0.10830961956289   | 0.756822506041889 | 0.934188766995886  | NA                   | NA            | NA                  | XP_001663741.1transcription factor grauzone                                                             |
| AAEL0123f TATA-box-binding protein                                                 | -0.108251459869635  | 0.644749816357133 | 0.906554905014882  | NA                   | aag03022      | ETN67643.1 tata-box | XP_001662432.1TATA-box-binding protein                                                                  |
| AAEL0155f mitochondrial import inner membrane translocase subunit Tim17-A          | -0.108192682538926  | 0.330471135686635 | 0.754028115692639  | NA                   | NA            | NA                  | XP_021711938.1mitochondrial import inner membrane translocase subunit Tim17-A isoform X1                |
| AAEL0249f NA                                                                       | -0.108165938882743  | 0.457867411761884 | 0.833283524364043  | NA                   | NA            | NA                  | XP_021713171.1organic cation transporter protein                                                        |
| AAEL0002f 26S proteasome non-ATPase regulatory subunit 7                           | -0.108097542812635  | 0.456573322789728 | 0.832617462606238  | NA                   | aag03050      | KFB51318.1 AGAP01   | XP_001654781.126S proteasome non-ATPase regulatory subunit 7                                            |
| AAEL0183f NA                                                                       | -0.107889923763546  | 0.677200687783985 | 0.914481546552978  | NA                   | NA            | NA                  | XP_021696985.1solute carrier family 28 member 3 isoform X1                                              |
| AAEL0032f glutaredoxin 3                                                           | -0.107808210394771  | 0.387322985566204 | 0.791825725928371  | NA                   | NA            | NA                  | XP_001656530.1glutaredoxin 3                                                                            |
| AAEL0250f NA                                                                       | -0.107562397078296  | 0.569585034626026 | 0.880635379772131  | 531                  | aag01100; aag | NA                  | XP_001653975.2iduronate 2-sulfatase                                                                     |
| AAEL0063f probable aminoacyl tRNA synthase complex-interacting multifunctional p   | -0.107535015468     | 0.378322767912993 | 0.78478947827673   | NA                   | NA            | KXJ76368.1 hypothe  | XP_001652196.1probable aminoacyl tRNA synthase complex-interacting multifunctional protein 2 isoform X2 |
| AAEL0227f NA                                                                       | -0.107428745894463  | 0.527696149680074 | 0.865973876319045  | NA                   | aag04391; aag | NA                  | XP_001657364.2zmoesin/ezrin/radixin homolog 2 isoform X1                                                |
| AAEL0094f N(4)-(Beta-N-acetylglucosaminy)-L-asparaginase                           | -0.107310090950061  | 0.428793826374457 | 0.816927699854607  | NA                   | aag04142; aag | NA                  | XP_019539674.1 N(4)-(Beta-N-acetylglucosaminy)-L-asparaginase-like                                      |
| AAEL0113f zinc finger protein Xfin                                                 | -0.107298665538394  | 0.460492045116088 | 0.834457146359854  | NA                   | NA            | KXJ69791.1 hypothe  | XP_021710987.1zinc finger protein Xfin                                                                  |
| AAEL0016f nuclear migration protein nudC                                           | -0.107293184035126  | 0.727126940792162 | 0.923566968708516  | NA                   | NA            | KXJ83055.1 hypothe  | XP_001659940.1nuclear migration protein nudC                                                            |
| AAEL0073f uncharacterized LOC5569017                                               | -0.107274712375931  | 0.725556052394127 | 0.923177868750456  | NA                   | aag01100; aag | KXJ69335.1 hypothe  | XP_021704299.1uncharacterized protein LOC5569017 isoform X1                                             |
| AAEL0108f ATP synthase subunit O, mitochondrial                                    | -0.107236480156553  | 0.437393372558386 | 0.820960220424486  | NA                   | aag01100; aag | KXJ69740.1 hypothe  | XP_001655005.1ATP synthase subunit O, mitochondrial                                                     |
| AAEL0037f uncharacterized LOC5578870                                               | -0.107110538950746  | 0.764587796414194 | 0.938598839393547  | NA                   | NA            | KXJ73547.1 hypothe  | XP_001664081.2uncharacterized protein LOC5578870                                                        |
| AAEL0117f probable citrate synthase 2, mitochondrial                               | -0.106920369111583  | 0.433938758388588 | 0.820613328132303  | NA                   | aag01100; aag | KFB50224.1 hypothe  | XP_001655738.1probable citrate synthase 2, mitochondrial                                                |
| AAEL0020f probable cytochrome P450 305a1                                           | -0.106773387517834  | 0.52530637759497  | 0.865680248818465  | NA                   | NA            | XP_019528612.1 PRE  | XP_001654598.1probable cytochrome P450 305a1                                                            |
| AAEL0128f probable aconitate hydratase, mitochondrial                              | -0.106709399286948  | 0.44173781517131  | 0.824183166100242  | 00290; 00630; 00720; | aag01100; aag | NA                  | XP_001663037.1probable aconitate hydratase, mitochondrial                                               |
| AAEL0222f NA                                                                       | -0.106641786022917  | 0.436173147308382 | 0.820960220424486  | NA                   | NA            | NA                  | NA                                                                                                      |
| AAEL0063f tyrosine-protein phosphatase 69D                                         | -0.106430771533687  | 0.407113997978226 | 0.803535299237735  | NA                   | NA            | KXJ82559.1 hypothe  | XP_021708822.1tyrosine-protein phosphatase 69D                                                          |
| AAEL0029f protein ABHD17B                                                          | -0.106415371838547  | 0.792336817269693 | 0.945793949302124  | NA                   | NA            | KXJ80792.1 hypothe  | XP_001656235.1protein ABHD17B                                                                           |
| AAEL0109f UPF0454 protein C12orf49 homolog                                         | -0.106391992553818  | 0.466384509661017 | 0.838900928502398  | NA                   | NA            | KXJ84575.1 hypothe  | XP_001655054.1UPF0454 protein C12orf49 homolog                                                          |
| AAEL0039f neurofilament heavy polypeptide                                          | -0.106107383846159  | 0.557605762323231 | 0.877259057086403  | NA                   | aag03420; aag | KXJ70360.1 hypothe  | XP_001648058.1neurofilament heavy polypeptide                                                           |
| AAEL0058f uncharacterized LOC5579836                                               | -0.106009494717421  | 0.371033480121717 | 0.781817769662763  | NA                   | NA            | KXJ82306.1 hypothe  | XP_001651511.1uncharacterized protein LOC5579836                                                        |
| AAEL0128f meiotic nuclear division protein 1 homolog                               | -0.106001837265212  | 0.709363014772019 | 0.918410624324032  | NA                   | NA            | NA                  | XP_001663031.1meiotic nuclear division protein 1 homolog                                                |
| AAEL0262f NA                                                                       | -0.105970846595739  | 0.411834953914163 | 0.806720047134699  | NA                   | aag03013; aag | NA                  | XP_001651200.1THO complex subunit 4-A                                                                   |
| AAEL0076f katanin p60 ATPase-containing subunit A-like 1                           | -0.105963767901047  | 0.549123179730684 | 0.873169431463929  | NA                   | NA            | XP_001854132.1 kat  | XP_021707528.1katanin p60 ATPase-containing subunit A-like 1                                            |
| AAEL0262f NA                                                                       | -0.105901229888697  | 0.579832208695363 | 0.882503470793042  | NA                   | NA            | NA                  | XP_019543109.1 neogenin-like                                                                            |
| AAEL0196f NA                                                                       | -0.105795110964874  | 0.54626349261726  | 0.870931414970375  | NA                   | NA            | NA                  | XP_019545728.1 major facilitator superfamily domain-containing protein 6-like                           |
| AAEL0044f pre-rRNA-processing protein TSR1 homolog                                 | -0.105783966429989  | 0.358149885497852 | 0.773854174836904  | NA                   | NA            | KXJ78145.1 hypothe  | XP_001649282.2pre-rRNA-processing protein TSR1 homolog isoform X2                                       |
| AAEL0123f protein goliath                                                          | -0.105746171844689  | 0.45968641812657  | 0.834049651682047  | NA                   | NA            | XP_019933118.1 PRE  | XP_021710000.1protein goliath isoform X1                                                                |
| AAEL0201f NA                                                                       | -0.105663474875486  | 0.629818891328874 | 0.902037889184171  | NA                   | NA            | NA                  | XP_021707780.1cholinephosphotransferase 1 isoform X1                                                    |
| AAEL0003f peroxidasin                                                              | -0.105585282700504  | 0.536635055777079 | 0.868163815622483  | 940                  | NA            | ETN68124.1 peroxid  | XP_021697884.1peroxidasin isoform X1                                                                    |
| AAEL0182f NA                                                                       | -0.10543861483581   | 0.758186998195067 | 0.935439571457873  | NA                   | NA            | NA                  | XP_021707552.1uncharacterized protein LOC5578567                                                        |
| AAEL0281f NA                                                                       | -0.105305561802063  | 0.615873410119241 | 0.897164966965308  | NA                   | NA            | NA                  | NA                                                                                                      |
| AAEL0153f glucoside xylosyltransferase 1                                           | -0.105233988212232  | 0.650563966761019 | 0.906932039402093  | NA                   | aag00514      | NA                  | XP_021700854.1glucoside xylosyltransferase 1                                                            |
| AAEL0101f trifunctional enzyme subunit alpha, mitochondrial                        | -0.105126540506475  | 0.392359093544445 | 0.793341218606811  | 00062; 00362; 00930; | aag01100; aag | NA                  | XP_001654258.2trifunctional enzyme subunit alpha, mitochondrial                                         |
| AAEL0062f uncharacterized LOC5567651                                               | -0.105001132596491  | 0.538250369756522 | 0.869670565558805  | NA                   | NA            | ETN64136.1 hypothe  | XP_001651846.1uncharacterized protein LOC5567651                                                        |
| AAEL0065f V-type proton ATPase subunit H                                           | -0.104966725042377  | 0.348794763118597 | 0.7672440408961813 | NA                   | aag01100; aag | KFB39891.1 vacuolar | XP_001652018.1V-type proton ATPase subunit H isoform X2                                                 |
| AAEL0076f NADH dehydrogenase [ubiquinone] flavoprotein 1, mitochondrial            | -0.104958855336754  | 0.418871385951616 | 0.81334897789628   | NA                   | aag01100; aag | ETN67150.1 NADH-u   | XP_001658587.2NADH dehydrogenase [ubiquinone] flavoprotein 1, mitochondrial                             |
| AAEL0077f 60S ribosomal protein L21                                                | -0.1049040816811765 | 0.476773019749926 | 0.844867278451347  | NA                   | aag03010      | KXJ71908.1 hypothe  | XP_001652845.160S ribosomal protein L21                                                                 |
| AAEL0274f NA                                                                       | -0.104849753577499  | 0.426384619443257 | 0.814868383284891  | NA                   | NA            | NA                  | XP_001662009.2FACT complex subunit spt16 isoform X2                                                     |

|                                                                       |                     |                    |                   |              |               |                                    |                                                                                  |                                                |
|-----------------------------------------------------------------------|---------------------|--------------------|-------------------|--------------|---------------|------------------------------------|----------------------------------------------------------------------------------|------------------------------------------------|
| AAEL00151 uncharacterized LOC5571097                                  | -0.102931139899828  | 0.350724563210124  | 0.768176246660341 | NA           | NA            | KXJ71240.1 hypothe                 | XP_001659542.1uncharacterized protein LOC5571097                                 |                                                |
| AAEL0040f MICOS complex subunit Mic19                                 | -0.102825592788983  | 0.432819295482315  | 0.820055280371151 | NA           | NA            | XP_001851093.1 con                 | XP_001648362.2MICOS complex subunit Mic19                                        |                                                |
| AAEL0236f NA                                                          | -0.102791719767075  | 0.500139248740926  | 0.858029916331016 | NA           | NA            | NA                                 | XP_021712995.1probable GPI-anchored adhesin-like protein PGA55 isoform X2        |                                                |
| AAEL0038f DNA repair protein complementing XP-C cells homolog         | -0.102583950098726  | 0.723256854162003  | 0.921934742632737 | NA           | aag03420      | KFB35511.1 AGAP00                  | XP_001664274.1DNA repair protein complementing XP-C cells homolog                |                                                |
| AAEL0107f 40S ribosomal protein S19a                                  | -0.102567011796068  | 0.475854434449007  | 0.844841309241706 | NA           | aag03010      | ACL37989.1 40S ribo                | XP_001654856.140S ribosomal protein S19a                                         |                                                |
| AAEL0105f protein vestigial                                           | -0.102468917462909  | 0.577577000848467  | 0.881961491587822 | NA           | NA            | XP_017839737.1 PRE                 | XP_001654640.2protein vestigial isoform X2                                       |                                                |
| AAEL0048f sodium/potassium/calcium exchanger 4                        | -0.102421244274509  | 0.679351863968285  | 0.914481546552978 | NA           | NA            | XP_001846078.1 sod                 | XP_021707036.1sodium/potassium/calcium exchanger 4                               |                                                |
| AAEL0062f uncharacterized LOC5567650                                  | -0.102406866266871  | 0.566936408945303  | 0.880302387766415 | NA           | NA            | XP_019559001.1 PRE                 | XP_019559001.1 SWI/SNF chromatin-remodeling complex subunit SNF5-like isoform X1 |                                                |
| AAEL0195f NA                                                          | -0.102396664248199  | 0.630617693037648  | 0.90233929580663  | NA           | NA            | NA                                 | XP_021694862.1ataxin-2 homolog                                                   |                                                |
| AAEL0210f NA                                                          | -0.102329813419372  | 0.436579889384229  | 0.82096020424486  | NA           | NA            | NA                                 | XP_021698235.1solute carrier organic anion transporter family member 2A1         |                                                |
| AAEL0276f NA                                                          | -0.102304037415137  | 0.446380137618682  | 0.828189271329869 | NA           | NA            | NA                                 | XP_021695873.1short-chain dehydrogenase/reductase family 16C member 6 isoform X1 |                                                |
| AAEL0245f NA                                                          | -0.102228906711204  | 0.419594771207491  | 0.813550586736479 | NA           | NA            | NA                                 | XP_019547618.1 protocadherin Fat 4-like                                          |                                                |
| AAEL0083f receptor-type guanylate cyclase Gyc76C                      | -0.10221830374309   | 0.54222383712343   | 0.869900911343623 | NA           | aag01100; aag | KXJ79765.1 hypothe                 | XP_021708902.1receptor-type guanylate cyclase Gyc76C                             |                                                |
| AAEL0055f transient-receptor-potential-like protein                   | -0.102188130412754  | 0.372390154288654  | 0.781817769662763 | NA           | aag04745      | KGB69891.1 hypothe                 | XP_001651106.2transient-receptor-potential-like protein                          |                                                |
| AAEL0022f calcium and integrin-binding protein 1                      | -0.102166254190522  | 0.518753706257327  | 0.863455012004955 | NA           | NA            | NP_001299270.1 cal                 | XP_001654973.1calcium and integrin-binding protein 1                             |                                                |
| AAEL0204f NA                                                          | -0.102115556457225  | 0.527026201425714  | 0.865973876319045 | NA           | NA            | XP_021697371.1cohesin subunit SA-1 | XP_021696939.1protein phosphatase 1 regulatory subunit 12A isoform X5            |                                                |
| AAEL0127f protein phosphatase 1 regulatory subunit 12A                | -0.102027424831602  | 0.410103910122367  | 0.805356078752463 | NA           | NA            | NA                                 | XP_019557147.1 PRE                                                               | XP_019557147.1 LIM domain-containing protein A |
| AAEL0088f uncharacterized LOC5571132                                  | -0.101995062671185  | 0.42423873046551   | 0.814488795690304 | NA           | NA            | NA                                 | XP_019557147.1 PRE                                                               | XP_019557147.1 LIM domain-containing protein A |
| AAEL0074f protein odd-skipped                                         | -0.101980203764927  | 0.783121758052385  | 0.94397254618785  | NA           | NA            | KXJ80160.1 hypothe                 | XP_021701066.1protein odd-skipped                                                |                                                |
| AAEL0149f RNA polymerase II-associated protein 3                      | -0.10197591739087   | 0.493704762885992  | 0.852730548041194 | NA           | NA            | NA                                 | XP_021699825.1RNA polymerase II-associated protein 3 isoform X1                  |                                                |
| AAEL0023f zinc finger protein 2                                       | -0.101927655245378  | 0.749643837613844  | 0.932554085844433 | NA           | NA            | XP_019544793.1 PRE                 | XP_021694587.1zinc finger protein 2                                              |                                                |
| AAEL0099f protein lethal(2) giant larvae                              | -0.101893834895518  | 0.404713129310552  | 0.800800458735306 | NA           | aag04391      | NA                                 | XP_021694167.1protein lethal(2) giant larvae                                     |                                                |
| AAEL0280f NA                                                          | -0.101726265816248  | 0.655000194538289  | 0.908200559699054 | NA           | aag01100; aag | NA                                 | XP_021713271.1adenylate cyclase type 9 isoform X2                                |                                                |
| AAEL0290f NA                                                          | -0.101532323713081  | 0.712300562825484  | 0.919252089784076 | 00790; 00730 | NA            | NA                                 | XP_001663539.2uncharacterized protein LOC5577765                                 |                                                |
| AAEL0274f NA                                                          | -0.101381706962151  | 0.372354711326197  | 0.781817769662763 | NA           | NA            | NA                                 | XP_019554904.1 protein artichoke-like isoform X5                                 |                                                |
| AAEL0126f activating transcription factor of chaperone                | -0.101360380813383  | 0.395637781007355  | 0.796468794756001 | NA           | aag04141; aag | XP_019543695.1 PRE                 | XP_021701619.1activating transcription factor of chaperone isoform X1            |                                                |
| AAEL0273f NA                                                          | -0.101353955862971  | 0.767666624337018  | 0.939827742988808 | NA           | NA            | NA                                 | XP_021703227.1oocyte zinc finger protein XICOF6 isoform X1                       |                                                |
| AAEL0098f protein xmas-2                                              | -0.101223213341475  | 0.658555157955558  | 0.909580313002131 | NA           | NA            | NA                                 | XP_001660477.2protein xmas-2                                                     |                                                |
| AAEL0154f serine protease easter                                      | -0.101147753828433  | 0.515767301120272  | 0.861448202130317 | NA           | NA            | NA                                 | XP_021704443.1serine protease easter                                             |                                                |
| AAEL0066f protein phosphatase 1 regulatory subunit 14B                | -0.101137865809801  | 0.61143563032      | 0.894646314231935 | NA           | NA            | CRL02858.1 CLUMA_                  | XP_019561337.1 protein phosphatase 1 regulatory subunit 14B-like                 |                                                |
| AAEL0051f regulation of nuclear pre-mRNA domain-containing protein 1B | -0.101129099646515  | 0.602514080437776  | 0.892663752727165 | NA           | NA            | ETN64253.1 hypothe                 | XP_001650398.1regulation of nuclear pre-mRNA domain-containing protein 1B        |                                                |
| AAEL0073f phospholipase A2 inhibitor                                  | -0.100943406226978  | 0.631800521574138  | 0.902506916959539 | NA           | NA            | KXJ71826.1 hypothe                 | XP_021705057.1phospholipase A2 inhibitor                                         |                                                |
| AAEL0045f dual 3',5'-cyclic-AMP and -GMP phosphodiesterase 11         | -0.100834311661257  | 0.358945514129182  | 0.77388983997572  | NA           | aag01100; aag | XP_019525355.1 PRE                 | XP_021701355.1dual 3',5'-cyclic-AMP and -GMP phosphodiesterase 11 isoform X1     |                                                |
| AAEL0087f RNA polymerase II transcriptional coactivator               | -0.100832281701151  | 0.513536894141198  | 0.861309357197051 | NA           | NA            | ETN61999.1 p31A [A                 | XP_001653441.1RNA polymerase II transcriptional coactivator                      |                                                |
| AAEL0043f uncharacterized LOC5564560                                  | -0.100806451725471  | 0.69659142320373   | 0.916122517126697 | NA           | NA            | NA                                 | XP_001648906.1uncharacterized protein LOC5564560 isoform X1                      |                                                |
| AAEL0258f NA                                                          | -0.100796179423714  | 0.644058669184742  | 0.906332602788493 | NA           | NA            | NA                                 | XP_019561494.1 spatacsin                                                         |                                                |
| AAEL0211f NA                                                          | -0.100492417278089  | 0.410984727574243  | 0.805855841282375 | NA           | NA            | NA                                 | XP_021706028.1uncharacterized protein LOC5576007 isoform X1                      |                                                |
| AAEL0252f NA                                                          | -0.100378754159211  | 0.649784306144867  | 0.90663577761678  | NA           | NA            | NA                                 | XP_021696874.1LON peptidase N-terminal domain and RING finger protein 2          |                                                |
| AAEL0042f kinesin-like protein Klp10A                                 | -0.1002914499557    | 0.419554408942704  | 0.813550586736479 | NA           | NA            | XP_019530397.1 PRE                 | XP_021700191.1kinesin-like protein Klp10A isoform X5                             |                                                |
| AAEL0235f NA                                                          | -0.100278225899455  | 0.58461457273247   | 0.885175928718656 | NA           | NA            | NA                                 | XP_021699154.1phosphatase and actin regulator 4 isoform X7                       |                                                |
| AAEL0180f NA                                                          | -0.100119595799855  | 0.451823410223884  | 0.831369530269982 | NA           | NA            | NA                                 | XP_021709353.1ATP-binding cassette sub-family A member 13                        |                                                |
| AAEL0132f NA                                                          | -0.100093076534325  | 0.7924665147952    | 0.945793949302124 | NA           | NA            | NA                                 | XP_001663426.1high affinity copper uptake protein 1                              |                                                |
| AAEL0108f uncharacterized LOC5573992                                  | -0.100073274409922  | 0.739740960579758  | 0.928416888458789 | NA           | NA            | KXJ72540.1 hypothe                 | XP_001661077.1uncharacterized protein LOC5573992                                 |                                                |
| AAEL0062f glycogen-binding subunit 76A                                | -0.100030834507956  | 0.34890667725927   | 0.767244408961813 | NA           | NA            | NA                                 | XP_021696499.1glycogen-binding subunit 76A isoform X5                            |                                                |
| AAEL0097f endophilin-B1                                               | -0.099964326058342  | 0.484552844916311  | 0.847655581875201 | NA           | aag04144; aag | NA                                 | XP_021705286.1endophilin-B1 isoform X2                                           |                                                |
| AAEL0205f NA                                                          | -0.0998991476712027 | 0.363558259205117  | 0.778250660803901 | NA           | aag03013      | NA                                 | XP_021709475.1eukaryotic translation initiation factor 4 gamma 3-like isoform X4 |                                                |
| AAEL0087f pro-resilin                                                 | -0.0998719334744311 | 0.684848278580578  | 0.914629465876247 | NA           | NA            | KFB45925.1 cuticle p               | XP_019544304.1 pro-resilin                                                       |                                                |
| AAEL0033f NA                                                          | -0.0998376916485469 | 0.439630342560704  | 0.822753388701159 | NA           | NA            | KXJ70241.1 hypothe                 | XP_001656735.1zinc finger protein 622                                            |                                                |
| AAEL0013f coronin-6                                                   | -0.0997369774534289 | 0.37933169461743   | 0.785666748907449 | NA           | NA            | KXJ83210.1 hypothe                 | XP_001653160.1coronin-6 isoform X1                                               |                                                |
| AAEL0083f enhancer of mRNA-decapping protein 3                        | -0.0996412913881448 | 0.603690761650487  | 0.893543893953319 | NA           | aag03018      | KXJ75718.1 hypothe                 | XP_021705253.1enhancer of mRNA-decapping protein 3                               |                                                |
| AAEL0257f NA                                                          | -0.099586061558691  | 0.750508317089457  | 0.932554085844433 | NA           | NA            | NA                                 | XP_021702845.1toll-like receptor Tollo                                           |                                                |
| AAEL0096f pyridoxal kinase                                            | -0.0995520425424218 | 0.402917137918497  | 0.799923085895579 | 750          | aag01100; aag | NA                                 | XP_001653877.1pyridoxal kinase                                                   |                                                |
| AAEL0204f NA                                                          | -0.0995043217480593 | 0.514928089299737  | 0.861448202130317 | NA           | NA            | NA                                 | XP_021701841.1VWFA and cache domain-containing protein CG16868                   |                                                |
| AAEL0046f NA                                                          | -0.0994054458429719 | 0.569510669396627  | 0.880635379772131 | aag03010     | NA            | NA                                 | XP_021708202.128S ribosomal protein S10, mitochondrial                           |                                                |
| AAEL0006f toll-like receptor 6                                        | -0.0992444699178052 | 0.7252515907246845 | 0.923066120399097 | NA           | NA            | KXJ82551.1 hypothe                 | XP_021710321.1toll-like receptor 6                                               |                                                |
| AAEL0067f cytochrome c oxidase assembly protein COX11, mitochondrial  | -0.099235124355224  | 0.574550611507928  | 0.881197098233729 |              |               |                                    |                                                                                  |                                                |

|                                                                              |                      |                    |                   |                                    |               |                |                                               |                                       |                                                                      |
|------------------------------------------------------------------------------|----------------------|--------------------|-------------------|------------------------------------|---------------|----------------|-----------------------------------------------|---------------------------------------|----------------------------------------------------------------------|
| AAEL00881 NADH dehydrogenase [ubiquinone] 1 alpha subcomplex assembly factor | -0.0978060894976197  | 0.594954505791948  | 0.888948786307326 | NA                                 | NA            | KXJ75028.1     | hypothei                                      | XP_001659497.1                        | NADH dehydrogenase [ubiquinone] 1 alpha subcomplex assembly factor 3 |
| AAEL01395 zinc finger protein 624                                            | -0.0977954203853354  | 0.766702455316493  | 0.939190095024277 | NA                                 | NA            | NA             | NA                                            | XP_001657251.2                        | zinc finger protein 624                                              |
| AAEL0134C tetraspanin-2                                                      | -0.0977504792468353  | 0.645427622733441  | 0.906554905014882 | NA                                 | NA            | NA             | NA                                            | XP_001663594.1                        | tetraspanin-2 isoform X2                                             |
| AAEL01967 NA                                                                 | -0.0977289391296479  | 0.59292736564101   | 0.888529762455765 | NA                                 | aag03015      | NA             | NA                                            | XP_021706199.1                        | mRNA-capping enzyme                                                  |
| AAEL0010174 protein bric-a-brac 2                                            | -0.0977005910046566  | 0.710788951449078  | 0.918935795219545 | NA                                 | NA            | KXJ81889.1     | hypothei                                      | XP_001660260.2                        | protein bric-a-brac 2                                                |
| AAEL0197C NA                                                                 | -0.0976720010528652  | 0.659715452002438  | 0.909580313002131 | NA                                 | aag04150; aag | NA             | NA                                            | XP_019548561.1                        | frizzled-2-like                                                      |
| AAEL00186 glutamine synthetase 1, mitochondrial                              | -0.0975673885474836  | 0.435494517209625  | 0.820960220424486 | 00250; 00220; 00910; aag01100; aag | KXJ69239.1    | hypothei       | XP_001654185.1                                | glutamine synthetase 1, mitochondrial |                                                                      |
| AAEL01291 Golgi pH regulator                                                 | -0.0975625137444916  | 0.618961360876717  | 0.897318336565571 | NA                                 | NA            | NA             | NA                                            | XP_001663047.1                        | Golgi pH regulator                                                   |
| AAEL00991 rootletin                                                          | -0.0973538608091319  | 0.750774172077419  | 0.932554085844433 | NA                                 | NA            | NA             | NA                                            | XP_021713034.1                        | rootletin isoform X1                                                 |
| AAEL00181 eukaryotic translation initiation factor 4E-binding protein 1      | -0.0973239600273049  | 0.391134905997479  | 0.793285976044306 | NA                                 | aag03013; aag | XP_001846418.1 | Euk                                           | XP_001654151.1                        | eukaryotic translation initiation factor 4E-binding protein 1        |
| AAEL00391 peripheral plasma membrane protein CASK                            | -0.0972987588867502  | 0.590050803652905  | 0.887668474886052 | 230                                | NA            | XP_019933087.1 | PRE                                           | XP_021693237.1                        | peripheral plasma membrane protein CASK isoform X7                   |
| AAEL00231 chymotrypsin-2                                                     | -0.0972936714331453  | 0.721621418865942  | 0.921632240999916 | NA                                 | NA            | XP_019525841.1 | PRE                                           | XP_019525841.1                        | chymotrypsin-1-like                                                  |
| AAEL01005 small integral membrane protein 14                                 | -0.0972726201573925  | 0.359849682660653  | 0.774255626424296 | NA                                 | NA            | NA             | NA                                            | XP_001654241.1                        | small integral membrane protein 14                                   |
| AAEL0105C LDLR chaperone boca                                                | -0.0970895689741039  | 0.59262092859707   | 0.888529762455765 | NA                                 | NA            | NA             | NA                                            | XP_001660887.1                        | LDLR chaperone boca                                                  |
| AAEL00075 polyubiquitin-C                                                    | -0.0969742943942686  | 0.436362122928503  | 0.820960220424486 | NA                                 | NA            | XP_019543209.1 | PRE                                           | XP_019895692.1                        | polyubiquitin isoform X1                                             |
| AAEL0059C protein TANC2                                                      | -0.09696606703413674 | 0.556516168987332  | 0.876744014213565 | NA                                 | NA            | XP_019933121.1 | PRE                                           | XP_021708756.1                        | protein TANC2 isoform X1                                             |
| AAEL00765 dihydropyrimidinase                                                | -0.0969541604066386  | 0.4231096467949038 | 0.814192545906728 | NA                                 | aag01100; aag | XP_019537242.1 | PRE                                           | XP_001658524.2                        | dihydropyrimidinase isoform X2                                       |
| AAEL01211 probable 26S proteasome non-ATPase regulatory subunit 3            | -0.0969326466259763  | 0.399908406686987  | 0.798648539435638 | NA                                 | aag03050      | KXJ80696.1     | hypothei                                      | XP_001662261.1                        | probable 26S proteasome non-ATPase regulatory subunit 3              |
| AAEL00606 proteasome subunit alpha type-2                                    | -0.0967760234311244  | 0.43587310422919   | 0.820960220424486 | NA                                 | aag03050      | ETN63429.1     | proteaseX                                     | XP_001651784.1                        | proteasome subunit alpha type-2                                      |
| AAEL01495 rab5 GDP/GTP exchange factor                                       | -0.0967628826176754  | 0.566752778542149  | 0.880302387766415 | NA                                 | NA            | NA             | NA                                            | XP_021698848.1                        | rab5 GDP/GTP exchange factor                                         |
| AAEL00665 voltage-gated potassium channel subunit beta-1                     | -0.0966912808723193  | 0.556398293519243  | 0.876744014213565 | NA                                 | NA            | XP_019534862.1 | PRE                                           | XP_019541076.1                        | voltage-gated potassium channel subunit beta-2-like                  |
| AAEL01405 general odorant-binding protein lush                               | -0.0966057995724942  | 0.742277521291679  | 0.929911685600432 | NA                                 | NA            | NA             | NA                                            | XP_001648015.1                        | general odorant-binding protein lush                                 |
| AAEL02535 NA                                                                 | -0.0965932048420333  | 0.812509207733396  | 0.950268140513817 | NA                                 | NA            | NA             | NA                                            | NA                                    |                                                                      |
| AAEL0226f NA                                                                 | -0.0964973853137592  | 0.77160769621677   | 0.941147080542193 | NA                                 | NA            | NA             | NA                                            | XP_021701685.1                        | zinc finger protein 2                                                |
| AAEL0269f NA                                                                 | -0.0964967137467786  | 0.598175752493415  | 0.890537659673905 | NA                                 | NA            | NA             | NA                                            | XP_021700119.1                        | uncharacterized protein LOC5575905                                   |
| AAEL02555 NA                                                                 | -0.0964626425891588  | 0.508899547984098  | 0.86083070787677  | NA                                 | aag03010      | XP_001656254.2 | 60S ribosomal protein L15                     |                                       |                                                                      |
| AAEL00706 peptidyl-prolyl cis-trans isomerase-like 1                         | -0.096404692058494   | 0.641610651231606  | 0.905347513233564 | NA                                 | aag03040      | ETN59794.1     | cyclophi                                      | XP_001652536.1                        | peptidyl-prolyl cis-trans isomerase-like 1                           |
| AAEL00606 UPF0547 protein C16orf87 homolog                                   | -0.0963756901972634  | 0.738603521470729  | 0.92803598695205  | NA                                 | NA            | KF842182.1     | AGAP00                                        | XP_001657402.1                        | UPF0547 protein C16orf87 homolog                                     |
| AAEL0129f E3 ubiquitin-protein ligase MARCH5                                 | -0.09608942673315171 | 0.573733822850026  | 0.881197098237229 | NA                                 | NA            | XP_001656302.2 | E3 ubiquitin-protein ligase MARCH5            |                                       |                                                                      |
| AAEL02655 NA                                                                 | -0.0960754333469597  | 0.64591951486357   | 0.906554905014882 | NA                                 | NA            | NA             | NA                                            | XP_019933026.1                        | ankyrin-2-like                                                       |
| AAEL0232f NA                                                                 | -0.0959994052084939  | 0.713454810230996  | 0.919252089784076 | NA                                 | NA            | NA             | NA                                            | XP_021708035.1                        | sodium channel protein para isoform X4                               |
| AAEL02131 NA                                                                 | -0.0959334322210128  | 0.538787639065273  | 0.869670565558805 | NA                                 | NA            | NA             | NA                                            | XP_021694753.1                        | uncharacterized protein LOC110674772 isoform X2                      |
| AAEL02471 NA                                                                 | -0.0958602311719408  | 0.499369005551808  | 0.857312236770101 | NA                                 | NA            | NA             | NA                                            | XP_021697831.1                        | ankyrin repeat domain-containing protein 11                          |
| AAEL0100f GPN-loop GTPase 1                                                  | -0.0958379017825142  | 0.6048480926444    | 0.893547770777888 | NA                                 | NA            | XP_001660613.1 | GPN-loop GTPase 1                             |                                       |                                                                      |
| AAEL00981 myotubularin-related protein 10-B                                  | -0.0958114494024455  | 0.559346783233889  | 0.877581080322399 | NA                                 | NA            | XP_001660425.1 | myotubularin-related protein 10-B             |                                       |                                                                      |
| AAEL0169f ABC transporter F family member 4                                  | -0.095807110357015   | 0.43611421453493   | 0.820960220424486 | NA                                 | NA            | XP_011493091.2 | ABC transporter F family member 4             |                                       |                                                                      |
| AAEL0132f 60S ribosomal protein L10a                                         | -0.0957790247773255  | 0.529135181206563  | 0.866002245975191 | NA                                 | aag03010      | XP_001656504.1 | 60S ribosomal protein L10a isoform X1         |                                       |                                                                      |
| AAEL0091f extended synaptotagmin-2                                           | -0.0957555104409123  | 0.458324182406697  | 0.833283524364043 | NA                                 | NA            | XP_001659792.2 | extended synaptotagmin-2 isoform X3           |                                       |                                                                      |
| AAEL0104f calcineurin subunit B type 2                                       | -0.0956830371796423  | 0.402363724309357  | 0.799341786858961 | NA                                 | aag04310      | XP_001660865.1 | calcineurin subunit B type 2                  |                                       |                                                                      |
| AAEL0095f protein obstructor-E                                               | -0.0956308903164055  | 0.61836889804328   | 0.897318336565571 | NA                                 | NA            | XP_001660247.2 | protein obstructor-E isoform X2               |                                       |                                                                      |
| AAEL0084f b(0,+)-type amino acid transporter 1                               | -0.0955466604903046  | 0.554582464417802  | 0.875346112791185 | NA                                 | NA            | XP_001865021.1 | cati                                          | XP_001654593.1                        | b(0,+)-type amino acid transporter 1                                 |
| AAEL0127f NA                                                                 | -0.0955208859897017  | 0.432562860420105  | 0.820005280371151 | NA                                 | aag04391      | XP_019530798.1 | PRE                                           | XP_001662857.2                        | arginine-glutamic acid dipeptide repeats protein                     |
| AAEL0104f exocyst complex component 8                                        | -0.0955143269693683  | 0.57695198250936   | 0.881961491587822 | NA                                 | NA            | XP_001660822.1 | exocyst complex component 8                   |                                       |                                                                      |
| AAEL0117f putative aldehyde dehydrogenase family 7 member A1 homolog         | -0.0955002498158075  | 0.522715210260357  | 0.865112475686296 | NA                                 | aag01100; aag | KXJ73424.1     | hypothei                                      | XP_001655664.1                        | putative aldehyde dehydrogenase family 7 member A1 homolog           |
| AAEL0050f uncharacterized LOC5565844                                         | -0.0953135803645797  | 0.776837270701044  | 0.94219804680943  | NA                                 | NA            | XP_019530854.1 | PRE                                           | XP_019530854.1                        | gastrula zinc finger protein xFG20-1 isoform X1                      |
| AAEL0207f NA                                                                 | -0.0953098523267536  | 0.746136105235671  | 0.931365937538534 | NA                                 | NA            | NA             | NA                                            | NA                                    |                                                                      |
| AAEL0198f NA                                                                 | -0.0952391495437648  | 0.694622846300493  | 0.916122517126697 | NA                                 | NA            | XP_021693726.1 | uncharacterized protein LOC5575947 isoform X1 |                                       |                                                                      |
| AAEL0060f shootin-1                                                          | -0.095166035292979   | 0.558515261828668  | 0.877581080322399 | NA                                 | NA            | XP_001845443.1 | con                                           | XP_019561859.1                        | shootin-1-like                                                       |
| AAEL0096f chymotrypsin-2                                                     | -0.0951307830678982  | 0.554456522314083  | 0.875297464116348 | NA                                 | NA            | XP_019525646.1 | chymotrypsin-2-like                           |                                       |                                                                      |
| AAEL0085f TPPP family protein CG45057                                        | -0.0950720505972027  | 0.505401760848386  | 0.858744381072989 | NA                                 | NA            | XP_019554789.1 | PRE                                           | XP_001653296.1                        | TPPP family protein CG45057 isoform X1                               |
| AAEL0221f NA                                                                 | -0.0949620863868424  | 0.4649928400992972 | 0.838171228759516 | NA                                 | NA            | XP_021698137.1 | formin-binding protein 1-like isoform X1      |                                       |                                                                      |
| AAEL0171f ribonuclease H1                                                    | -0.0949171930748721  | 0.682471529313667  | 0.914629465876247 | NA                                 | aag03030      | XP_011493451.1 | ribonuclease H1                               |                                       |                                                                      |
| AAEL0222f NA                                                                 | -0.0948051000741168  | 0.446455517160591  | 0.828189271329869 | NA                                 | NA            | XP_001650683.2 | UPF0518 protein AAEL005291 isoform X2         |                                       |                                                                      |
| AAEL0136f transcription factor A, mitochondrial                              | -0.0947972767405003  | 0.534921945501098  | 0.866763821535675 | NA                                 | NA            | XP_021701535.1 | transcription factor A, mitochondrial         |                                       |                                                                      |
| AAEL0112f pre-mRNA-splicing factor RBM22                                     | -0.0947476370640034  | 0.705117645064556  | 0.917749125552377 | NA                                 | aag03040      | ETN65205.1     | RNA bin                                       | XP_001661533.1                        | pre-mRNA-splicing factor RBM22                                       |
| AAEL0129f methyltransferase-like protein 6                                   | -0.0947439685062294  | 0.469976925384227  | 0.840895910438588 | NA                                 | NA            | XP_001656312.1 | methyltransferase-like protein 6              |                                       |                                                                      |
| AAEL0084f alpha-amylase A                                                    | -0.0945545914307008  | 0.574828388399656  | 0.881197098233729 | 00500; 00500                       | aag01100; aag | XP_001846545.1 | alpi                                          | XP_001653283.2                        | alpha-amylase A                                                      |
| AAEL0040f hemicentin-1                                                       | -0.0944798086900841  | 0.37932106447942   | 0.785666748907449 | NA                                 | NA            | XP_019536295.1 | PRE                                           | XP_019536295.1                        | hemicentin-1-like isoform X1                                         |
| AAEL0004f monocarboxylate transporter 14                                     | -0.0944578463517988  | 0.422336371075006  |                   |                                    |               |                |                                               |                                       |                                                                      |

|                                                                        |                      |                   |                    |                         |               |                                          |                                                                                      |
|------------------------------------------------------------------------|----------------------|-------------------|--------------------|-------------------------|---------------|------------------------------------------|--------------------------------------------------------------------------------------|
| AAEL0253f NA                                                           | -0.0927573190075644  | 0.469640240533733 | 0.84065046043825   | NA                      | aag03010      | NA                                       | XP_001655466.160S ribosomal protein L10                                              |
| AAEL0004f beta-catenin-like protein 1                                  | -0.0927524336779924  | 0.604006946148401 | 0.893547770777888  | NA                      | aag03040      | KXJ76861.1 hypothei                      | XP_001656979.1beta-catenin-like protein 1                                            |
| AAEL0071f NA                                                           | -0.0927054190200699  | 0.440008779091389 | 0.822798752521693  | NA                      | NA            | XP_019526624.1 PRE                       | XP_001658216.2proton-coupled amino acid transporter-like protein pathetic isoform X2 |
| AAEL0033f nucleolar complex protein 4 homolog A                        | -0.092621025414176   | 0.538697559004905 | 0.869670565558805  | NA                      | NA            | KXJ68214.1 hypothei                      | XP_001656754.1nucleolar complex protein 4 homolog A                                  |
| AAEL0078f cytochrome b-c1 complex subunit 7                            | -0.0924518067808905  | 0.512318922049142 | 0.86117733830732   | NA                      | aag01100; aag | ETN66225.1 ubiquin                       | XP_001652964.1cytochrome b-c1 complex subunit 7                                      |
| AAEL0183f NA                                                           | -0.0923376355028786  | 0.702592599535929 | 0.917106722424789  | NA                      | NA            | NA                                       | XP_001650493.2uncharacterized protein LOC5566132                                     |
| AAEL0045f 40S ribosomal protein S21                                    | -0.09233171224689081 | 0.536160648840115 | 0.867854052880692  | NA                      | NA            | KXJ68578.1 hypothei                      | XP_001647949.140S ribosomal protein S21                                              |
| AAEL0122f ubiquitin carboxyl-terminal hydrolase 15                     | -0.0922862823608325  | 0.547550628246868 | 0.872025074615382  | NA                      | aag04144; aag | KXJ73186.1 hypothei                      | XP_021711514.1ubiquitin carboxyl-terminal hydrolase 15 isoform X2                    |
| AAEL0234f NA                                                           | -0.0922128327783405  | 0.45248017497156  | 0.832078850936909  | NA                      | NA            | NA                                       | XP_021706136.1uncharacterized protein LOC5572713 isoform X1                          |
| AAEL0040f ubiquitin-like modifier-activating enzyme 5                  | -0.0921886619824214  | 0.530268787742339 | 0.8660606412563369 | NA                      | NA            | KXJ71409.1 hypothei                      | XP_021703960.1ubiquitin-like modifier-activating enzyme 5                            |
| AAEL0083f leucine-rich repeat serine/threonine-protein kinase 1        | -0.092166693100831   | 0.573340207846356 | 0.881074915264223  | 04151; 05165; 04714; NA | NA            | XP_019538485.1 PRE                       | XP_021698550.1leucine-rich repeat serine/threonine-protein kinase 1 isoform X1       |
| AAEL0063f V-type proton ATPase 116 kDa subunit a                       | -0.0921166970840922  | 0.402704412955237 | 0.799845889923179  | NA                      | aag01100; aag | KXJ74452.1 hypothei                      | XP_001657753.1V-type proton ATPase 116 kDa subunit a                                 |
| AAEL0037f V-type proton ATPase 116 kDa subunit a                       | -0.0920810872504523  | 0.398195797407175 | 0.797605077871316  | NA                      | aag01100; aag | XP_019526360.1 PRE                       | XP_001657232.1V-type proton ATPase 116 kDa subunit a isoform X3                      |
| AAEL0212f NA                                                           | -0.0920376528970773  | 0.647870926045885 | 0.906554905014882  | NA                      | NA            | XP_021704142.1protein enabled isoform X6 | XP_021704142.1protein enabled isoform X6                                             |
| AAEL0098f uncharacterized LOC5572554                                   | -0.0920009191431578  | 0.573722383558815 | 0.881197098233729  | NA                      | NA            | NA                                       | XP_001654068.2uncharacterized protein LOC5572554 isoform X2                          |
| AAEL0096f membrane-associated protein Hem                              | -0.091901385385853   | 0.569452032023452 | 0.880635379772131  | NA                      | NA            | NA                                       | XP_021699423.1membrane-associated protein Hem                                        |
| AAEL0118f zinc finger protein 569                                      | -0.0918524078757356  | 0.801440093349172 | 0.946215055875588  | NA                      | NA            | KXJ72289.1 hypothei                      | XP_021706088.1zinc finger protein 569                                                |
| AAEL0028f nischarin                                                    | -0.0918481454957819  | 0.644109250804831 | 0.906332602788493  | NA                      | NA            | KXJ74360.1 hypothei                      | XP_001656019.1nischarin isoform X2                                                   |
| AAEL0244f NA                                                           | -0.0918246814053979  | 0.54117336716696  | 0.869735874782513  | NA                      | NA            | NA                                       | XP_021704810.160S ribosomal protein L13a-like                                        |
| AAEL0263f NA                                                           | -0.0918004693634867  | 0.688779203825647 | 0.916010156153545  | NA                      | NA            | NA                                       | XP_021709497.1AT-rich interactive domain-containing protein 5B                       |
| AAEL0101f peptidoglycan-recognition protein LB                         | -0.0917624329335141  | 0.462973749225413 | 0.8372649439413983 | NA                      | NA            | NA                                       | XP_001654275.2peptidoglycan-recognition protein LB isoform X2                        |
| AAEL0029f late secretory pathway protein AVL9 homolog                  | -0.0917445634875574  | 0.652121514164826 | 0.907272485895905  | NA                      | NA            | KXJ70507.1 hypothei                      | XP_021697338.1late secretory pathway protein AVL9 homolog                            |
| AAEL0039f calpain-A                                                    | -0.091714248272602   | 0.450718924059937 | 0.830259097859495  | NA                      | NA            | NA                                       | XP_021708585.1calpain-A isoform X3                                                   |
| AAEL0008f kinesin-like protein Klp68D                                  | -0.0916251206498684  | 0.607228941211247 | 0.893547770777888  | NA                      | NA            | XP_019537920.1 PRE                       | XP_001651285.1kinesin-like protein Klp68D                                            |
| AAEL0131f cactin                                                       | -0.0916104405397443  | 0.668003253829937 | 0.912418872165226  | NA                      | NA            | NA                                       | XP_019531299.1 cactin-like                                                           |
| AAEL0075f NA                                                           | -0.0916005440059666  | 0.579027304868263 | 0.882283691803025  | NA                      | NA            | NA                                       | XP_021707895.1transcription intermediary factor 1-alpha isoform X4                   |
| AAEL0044f cytochrome c-2                                               | -0.0915155004426436  | 0.527223966264189 | 0.865973876319045  | NA                      | aag04214; aag | ETN58438.1 Cytochr                       | XP_001649236.1cytochrome c-2                                                         |
| AAEL0108f zinc finger protein 420                                      | -0.0914345625910548  | 0.677694107429349 | 0.914481546552978  | NA                      | NA            | XP_019529612.1 PRE                       | XP_021704560.1zinc finger protein 26 isoform X1                                      |
| AAEL0117f uncharacterized LOC5575270                                   | -0.091432506025598   | 0.48217436847938  | 0.846941547268585  | NA                      | NA            | KXJ82316.1 hypothei                      | XP_001661875.1uncharacterized protein LOC5575270                                     |
| AAEL0039f serine/threonine-protein kinase MARK2                        | -0.0913669739106147  | 0.420986049524092 | 0.813840460658889  | 04151; 05165; 04714; NA | NA            | NA                                       | XP_021704652.1MAP/microtubule affinity-regulating kinase 3 isoform X4                |
| AAEL0003f NADH dehydrogenase [ubiquinone] 1 alpha subcomplex subunit 2 | -0.0910914194738998  | 0.498058426165396 | 0.856340365764943  | NA                      | aag01100; aag | ETN58785.1 NADH-u                        | XP_001662904.1NADH dehydrogenase [ubiquinone] 1 alpha subcomplex subunit 2           |
| AAEL0070f prolyl 4-hydroxylase subunit alpha-1                         | -0.091031291645098   | 0.451008126522523 | 0.851056134946781  | 330                     | aag01100; aag | XP_019552003.1 PRE                       | XP_001658091.2prolyl 4-hydroxylase subunit alpha-1                                   |
| AAEL0021f oocyte zinc finger protein XICOF6                            | -0.0909819549483697  | 0.59516291865151  | 0.889050526327724  | NA                      | NA            | KXJ72030.1 hypothei                      | XP_021693080.1oocyte zinc finger protein XICOF6                                      |
| AAEL0041f CDGSH iron-sulfur domain-containing protein 3, mitochondrial | -0.0909315542070602  | 0.553811355133471 | 0.874920236325033  | NA                      | NA            | KXJ67776.1 hypothei                      | XP_001648564.1CDGSH iron-sulfur domain-containing protein 3, mitochondrial           |
| AAEL0223f NA                                                           | -0.0909181556669369  | 0.62224933163385  | 0.898271200863489  | NA                      | aag04146      | NA                                       | XP_021712993.1peroxisomal membrane protein PEX16                                     |
| AAEL0206f NA                                                           | -0.0908957299369856  | 0.542944076890355 | 0.869900911343623  | NA                      | NA            | NA                                       | XP_019554124.1 ankyrin repeat domain-containing protein 50-like                      |
| AAEL0118f hsc70-interacting protein 1                                  | -0.0908479325733347  | 0.446231255693131 | 0.828189271329869  | NA                      | NA            | KXJ73379.1 hypothei                      | XP_001655769.1hsc70-interacting protein 1                                            |
| AAEL0020f ejaculatory bulb-specific protein 3                          | -0.09080008971360595 | 0.770130431795041 | 0.941147080452193  | NA                      | NA            | KXJ74363.1 hypothei                      | XP_001660785.1ejaculatory bulb-specific protein 3                                    |
| AAEL0040f translocator protein                                         | -0.0907580557877059  | 0.513968502614931 | 0.861448202130317  | NA                      | aag04214; aag | KF836810.1 AGAPO0                        | XP_001648359.1translocator protein                                                   |
| AAEL0075f peroxisomal N(1)-acetyl-spermine/spermidine oxidase          | -0.0906493650197049  | 0.650640712931095 | 0.906932039402093  | NA                      | NA            | KXJ69112.1 hypothei                      | XP_001652819.2peroxisomal N(1)-acetyl-spermine/spermidine oxidase                    |
| AAEL0199f NA                                                           | -0.0906052981816728  | 0.758466842872848 | 0.935439571457873  | NA                      | NA            | NA                                       | XP_021704383.1protein twenty-2 isoform X2                                            |
| AAEL0234f NA                                                           | -0.0905407091592298  | 0.767733660513678 | 0.939827742988808  | NA                      | NA            | NA                                       | NA                                                                                   |
| AAEL0114f threonylcarbamoyladenine tRNA methylthiotransferase          | -0.0905373094388895  | 0.574821267366804 | 0.881197098233729  | NA                      | NA            | XP_001842139.1 aq                        | XP_021699838.1threonylcarbamoyladenine tRNA methylthiotransferase                    |
| AAEL0097f zinc finger protein 366                                      | -0.0904715416399457  | 0.772283477990022 | 0.941147080452193  | NA                      | NA            | NA                                       | XP_021713125.1zinc finger protein 366                                                |
| AAEL0025f WW domain-binding protein 2                                  | -0.0903871685126066  | 0.510506378316949 | 0.860452247709668  | NA                      | NA            | ETN61711.1 WW dor                        | XP_001655696.1WW domain-binding protein 2                                            |
| AAEL0091f NA                                                           | -0.0903747944940315  | 0.422363161127655 | 0.814192545906728  | NA                      | NA            | NA                                       | XP_019557912.1 neurotrypsin-like isoform X1                                          |
| AAEL0214f NA                                                           | -0.0903303160666717  | 0.729373224661306 | 0.923905484505959  | 564                     | aag00564      | NA                                       | AAB35001.1acetylcholinesterase, Ace                                                  |
| AAEL0128f cytochrome b561                                              | -0.0902018677548318  | 0.684084560209508 | 0.914629465876247  | NA                      | NA            | NA                                       | XP_021712866.1cytochrome b561 isoform X2                                             |
| AAEL0108f cytochrome b-c1 complex subunit 6, mitochondrial             | -0.090067018166923   | 0.59508153792997  | 0.860083070787677  | NA                      | aag01100; aag | KF835239.1 hypothe                       | XP_001654917.1cytochrome b-c1 complex subunit 6, mitochondrial                       |
| AAEL0063f N-acetyl-D-glucosamine kinase                                | -0.0900553221450629  | 0.534500891880192 | 0.866700945213732  | 520                     | aag01100; aag | KXJ71477.1 hypothei                      | XP_001651965.2N-acetyl-D-glucosamine kinase                                          |
| AAEL0276f NA                                                           | -0.0900441509045463  | 0.571912529690953 | 0.880923047085115  | NA                      | NA            | NA                                       | XP_021696083.1mediator of RNA polymerase II transcription subunit 13 isoform X1      |
| AAEL0008f protein unzipped                                             | -0.0898442594868046  | 0.440888450340252 | 0.823099111387908  | NA                      | NA            | KXJ72309.1 hypothei                      | XP_001651602.1protein unzipped                                                       |
| AAEL0124f N-alpha-acetyltransferase 30                                 | -0.0898061938749364  | 0.588370802920868 | 0.8865544667755825 | NA                      | NA            | KXJ77568.1 hypothei                      | XP_001656034.2N-alpha-acetyltransferase 30                                           |
| AAEL0013f peptidylglycine alpha-hydroxylating monooxygenase            | -0.089783345499364   | 0.42586560379731  | 0.814192545906728  | NA                      | NA            | KXJ72445.1 hypothei                      | XP_001659177.2peptidylglycine alpha-hydroxylating monooxygenase                      |
| AAEL0018f carboxypeptidase B                                           | -0.0896795642165583  | 0.7820961258645   | 0.943962424451135  | NA                      | NA            | XP_019537524.1 PRE                       | XP_001654131.2carboxypeptidase B                                                     |
| AAEL0230f NA                                                           | -0.0896462754462141  | 0.476141763932089 | 0.844867278451347  | NA                      | NA            | NA                                       | XP_021709303.1potential E3 ubiquitin-protein ligase ariadne-1                        |
| AAEL0113f zinc finger protein 708                                      | -0.0892526071450706  | 0.677028762797883 | 0.914438668403053  | NA                      | NA            | XP_001847687.1 zinc                      | XP_021709503.1zinc finger protein 708                                                |
| AAEL0098f alanine aminotransferase 1                                   | -0.089244902781316   | 0.476557024002511 | 0.844867278451347  | NA                      | aag01100; aag | NA                                       | XP_001660470.2alanine aminotransferase 1                                             |
| AAEL0224f NA                                                           | -0.0892056918493937  | 0.720307765609754 | 0.921583569204186  | NA                      | NA            | NA                                       | XP_021705310.1uncharacterized protein LOC110677878                                   |
| AAEL0213f NA                                                           | -0.0890963345725738  | 0.420698782209626 | 0.                 |                         |               |                                          |                                                                                      |

|                                                                                       |                     |                   |                   |                         |                                    |                                                                                          |                                                                                          |
|---------------------------------------------------------------------------------------|---------------------|-------------------|-------------------|-------------------------|------------------------------------|------------------------------------------------------------------------------------------|------------------------------------------------------------------------------------------|
| AAEL0100 <sup>4</sup> protein PTC3 homolog, mitochondrial                             | -0.0874137694674428 | 0.544562272915775 | 0.870429396451444 | NA                      | NA                                 | NA                                                                                       | XP_001660592.2protein PTC3 homolog, mitochondrial                                        |
| AAEL01121 PQ-loop repeat-containing protein 3                                         | -0.0873891761801796 | 0.530752746349184 | 0.866691320214768 | NA                      | NA                                 | XP_001862340.1 con                                                                       | XP_001655189.2PQ-loop repeat-containing protein 3                                        |
| AAEL0104 <sup>1</sup> CSC1-like protein 1                                             | -0.0873835211335797 | 0.516541210222206 | 0.861530579862055 | NA                      | NA                                 | NA                                                                                       | XP_001654529.1CSC1-like protein 1                                                        |
| AAEL0016 <sup>1</sup> zinc transporter ZIP1                                           | -0.0872707384650283 | 0.617255969846792 | 0.897318336565571 | NA                      | NA                                 | KXJ74939.1 hypothei                                                                      | XP_001659748.2zinc transporter ZIP1                                                      |
| AAEL0197 <sup>1</sup> NA                                                              | -0.0872612884294496 | 0.445588748103927 | 0.82793174864877  | NA                      | aag01100 ; aag NA                  | XP_021696839.1succinyl-CoA:3-ketoacid coenzyme A transferase 1, mitochondrial isoform X2 | XP_021696839.1succinyl-CoA:3-ketoacid coenzyme A transferase 1, mitochondrial isoform X2 |
| AAEL0121 <sup>1</sup> 32 kDa beta-galactoside-binding lectin lec-3                    | -0.087233819665162  | 0.616685492340708 | 0.897164966965308 | NA                      | NA                                 | KXJ68925.1 hypothei                                                                      | XP_001655870.132 kDa beta-galactoside-binding lectin lec-3                               |
| AAEL0216 <sup>1</sup> NA                                                              | -0.087145111563537  | 0.513024828225165 | 0.861297436611866 | NA                      | NA                                 | XP_021697226.1uncharacterized protein LOC5572744                                         | XP_021697226.1uncharacterized protein LOC5572744                                         |
| AAEL0062 <sup>1</sup> superoxide dismutase [Cu-Zn], chloroplastic                     | -0.0870181876807264 | 0.438421385437861 | 0.821493298472653 | NA                      | aag04146 ; aag KXJ75688.1 hypothei | XP_021699793.1superoxide dismutase [Cu-Zn], chloroplastic                                | XP_021699793.1superoxide dismutase [Cu-Zn], chloroplastic                                |
| AAEL0210 <sup>1</sup> NA                                                              | -0.087009429647396  | 0.615165513628951 | 0.896845306401023 | NA                      | 230 aag01100 ; aag NA              | XP_021704103.1cAMP-specific 3',5'-cyclic phosphodiesterase isoform X4                    | XP_021704103.1cAMP-specific 3',5'-cyclic phosphodiesterase isoform X4                    |
| AAEL0017 <sup>1</sup> DNA polymerase epsilon subunit 3                                | -0.0869314252001451 | 0.689704991295105 | 0.916122517126697 | NA                      | aag03420 ; aag NA                  | XP_001653952.2DNA polymerase epsilon subunit 3                                           | XP_001653952.2DNA polymerase epsilon subunit 3                                           |
| AAEL0006 <sup>1</sup> protein flightless-1 homolog                                    | -0.0869195665082499 | 0.651712522002361 | 0.907172139858737 | NA                      | NA                                 | XP_019556937.1 PRE                                                                       | XP_001649779.2protein flightless-1 homolog                                               |
| AAEL0092 <sup>1</sup> putative mediator of RNA polymerase II transcription subunit 12 | -0.0869192857941176 | 0.64236197848817  | 0.905763856274616 | NA                      | NA                                 | XP_001659839.2putative mediator of RNA polymerase II transcription subunit 12 isoform X1 | XP_001659839.2putative mediator of RNA polymerase II transcription subunit 12 isoform X1 |
| AAEL0274 <sup>1</sup> NA                                                              | -0.0868840444021322 | 0.619161437408984 | 0.897318336565571 | NA                      | NA                                 | XP_021699004.1SURF1-like protein                                                         | XP_021699004.1SURF1-like protein                                                         |
| AAEL0106 <sup>1</sup> phospholipid scramblase 1                                       | -0.086832851409386  | 0.485196300422117 | 0.847655581875201 | NA                      | NA                                 | XP_001661000.2phospholipid scramblase 2 isoform X2                                       | XP_001661000.2phospholipid scramblase 2 isoform X2                                       |
| AAEL0274 <sup>1</sup> NA                                                              | -0.0867081648800748 | 0.802755003497583 | 0.94649029363412  | NA                      | NA                                 | XP_021713246.1ATP-binding cassette sub-family G member 5                                 | XP_021713246.1ATP-binding cassette sub-family G member 5                                 |
| AAEL0062 <sup>1</sup> uncharacterized LOC5567696                                      | -0.0866427799336881 | 0.70672396710185  | 0.91797784850989  | NA                      | aag01100 ; aag NA                  | XP_001651860.2uncharacterized protein LOC5567696                                         | XP_001651860.2uncharacterized protein LOC5567696                                         |
| AAEL0260 <sup>1</sup> NA                                                              | -0.0866312453132728 | 0.440579399909387 | 0.822798752521693 | NA                      | NA                                 | XP_021698471.1 protein FAM13A                                                            | XP_021698471.1 protein FAM13A                                                            |
| AAEL0092 <sup>1</sup> phosphatidylinositol 4-kinase beta                              | -0.0866176598089211 | 0.478619314727004 | 0.845416382162313 | NA                      | aag01100 ; aag NA                  | XP_021695754.1phosphatidylinositol 4-kinase beta isoform X2                              | XP_021695754.1phosphatidylinositol 4-kinase beta isoform X2                              |
| AAEL0195 <sup>1</sup> NA                                                              | -0.0865918385067747 | 0.469657034951167 | 0.84065046403825  | NA                      | NA                                 | XP_021711641.1uncharacterized protein LOC5568599 isoform X1                              | XP_021711641.1uncharacterized protein LOC5568599 isoform X1                              |
| AAEL0212 <sup>1</sup> NA                                                              | -0.0865280173862251 | 0.460018902218294 | 0.834169795839746 | NA                      | NA                                 | XP_021709445.1transmembrane protein S3-A isoform X1                                      | XP_021709445.1transmembrane protein S3-A isoform X1                                      |
| AAEL0132 <sup>1</sup> ubiquitin carboxyl-terminal hydrolase 64E                       | -0.0865097206580565 | 0.424890984607904 | 0.814623464645531 | NA                      | NA                                 | XP_001663387.2ubiquitin carboxyl-terminal hydrolase 64E isoform X1                       | XP_001663387.2ubiquitin carboxyl-terminal hydrolase 64E isoform X1                       |
| AAEL0049 <sup>1</sup> neuronal acetylcholine receptor subunit alpha-4                 | -0.086406836696979  | 0.524030871363137 | 0.865215478807089 | NA                      | NA                                 | XP_019529517.1 PRE                                                                       | XP_001650052.2neuronal acetylcholine receptor subunit alpha-4 isoform X1                 |
| AAEL0010 <sup>1</sup> cyclin-dependent kinase 7                                       | -0.0863951415340284 | 0.716675353929068 | 0.920939339038682 | NA                      | aag03420 ; aag KXJ74709.1 hypothei | XP_001657865.1cyclin-dependent kinase 7                                                  | XP_001657865.1cyclin-dependent kinase 7                                                  |
| AAEL0061 <sup>1</sup> uncharacterized LOC5567579                                      | -0.0863720530696558 | 0.661740349810832 | 0.909942423634082 | NA                      | NA                                 | XP_001843133.1 con                                                                       | XP_021707137.1uncharacterized protein LOC5567579                                         |
| AAEL0145 <sup>1</sup> homeobox protein PKNOX1                                         | -0.0863687516351433 | 0.876008717050619 | 0.969652664055335 | NA                      | NA                                 | XP_021696774.1homeobox protein PKNOX1                                                    | XP_021696774.1homeobox protein PKNOX1                                                    |
| AAEL0239 <sup>1</sup> NA                                                              | -0.0862997608375003 | 0.572004461778785 | 0.880923047085115 | NA                      | NA                                 | XP_021712810.1uncharacterized protein LOC110681377                                       | XP_021712810.1uncharacterized protein LOC110681377                                       |
| AAEL0066 <sup>1</sup> ELAV-like protein 4                                             | -0.0862506209648755 | 0.531197850112012 | 0.866691320214768 | NA                      | NA                                 | ETN58341.1 RNA-bin                                                                       | XP_021701569.1ELAV-like protein 3 isoform X1                                             |
| AAEL0142 <sup>1</sup> complex I intermediate-associated protein 30, mitochondrial     | -0.0862463082562853 | 0.58409043679801  | 0.885175928718656 | NA                      | NA                                 | XP_001648190.1complex I intermediate-associated protein 30, mitochondrial                | XP_001648190.1complex I intermediate-associated protein 30, mitochondrial                |
| AAEL0114 <sup>1</sup> perlucin-like protein                                           | -0.0862050299723759 | 0.641009423791941 | 0.905347513233564 | NA                      | NA                                 | XP_019541732.1 PRE                                                                       | XP_001661683.2perlucin-like protein                                                      |
| AAEL0027 <sup>1</sup> uncharacterized LOC5576103                                      | -0.0861661097033587 | 0.560054741978814 | 0.877810208770064 | NA                      | NA                                 | KXJ74749.1 hypothei                                                                      | ABF18360.1mitochondrial NADH-ubiquinone oxidoreductase 9 kDa subunit-like protein        |
| AAEL0006 <sup>1</sup> peptide methionine sulfoxide reductase                          | -0.0860645898932874 | 0.780531608241072 | 0.943817589886248 | NA                      | NA                                 | KXJ75616.1 hypothei                                                                      | XP_001649798.1peptide methionine sulfoxide reductase                                     |
| AAEL0072 <sup>1</sup> protein ROP                                                     | -0.0859951121080756 | 0.476701697999446 | 0.844867278451347 | NA                      | NA                                 | KXJ69336.1 hypothei                                                                      | XP_001652658.1protein ROP isoform X1                                                     |
| AAEL0107 <sup>1</sup> GRIP and coiled-coil domain-containing protein 1                | -0.0859546127888061 | 0.713320675640109 | 0.919252089784076 | NA                      | NA                                 | KXJ68920.1 hypothei                                                                      | XP_001654860.1GRIP and coiled-coil domain-containing protein 1                           |
| AAEL0252 <sup>1</sup> NA                                                              | -0.0858806819682744 | 0.818311993170559 | 0.952816276386497 | NA                      | NA                                 | XP_021695630.1uncharacterized protein LOC5575770 isoform X3                              | XP_021695630.1uncharacterized protein LOC5575770 isoform X3                              |
| AAEL0098 <sup>1</sup> E3 ubiquitin-protein ligase znrf2                               | -0.0857953486764537 | 0.453471497526569 | 0.832617462606238 | NA                      | NA                                 | XP_021698233.1E3 ubiquitin-protein ligase znrf2 isoform X1                               | XP_021698233.1E3 ubiquitin-protein ligase znrf2 isoform X1                               |
| AAEL0241 <sup>1</sup> NA                                                              | -0.0857873183912624 | 0.505738543069133 | 0.858744381072989 | 62 NA                   | NA                                 | XP_021693689.1elongation of very long chain fatty acids protein AAEL008004 isoform X1    | XP_021693689.1elongation of very long chain fatty acids protein AAEL008004 isoform X1    |
| AAEL0040 <sup>1</sup> flotillin-2                                                     | -0.0857458985172367 | 0.542912772072461 | 0.869900911343623 | NA                      | NA                                 | XP_019531613.1 PRE                                                                       | XP_021710660.1flotillin-2 isoform X2                                                     |
| AAEL0242 <sup>1</sup> NA                                                              | -0.0857077093956631 | 0.759034178422674 | 0.935439571457873 | NA                      | NA                                 | XP_021699408.1zinc finger protein Xfin-like                                              | XP_021699408.1zinc finger protein Xfin-like                                              |
| AAEL0053 <sup>1</sup> syntenin-1                                                      | -0.0856562650652933 | 0.478934875645384 | 0.845454613425911 | NA                      | NA                                 | XP_019528994.1 PRE                                                                       | ABF18402.1syndecan binding protein                                                       |
| AAEL0063 <sup>1</sup> microtubule-associated serine/threonine-protein kinase 3        | -0.0854683821511119 | 0.50820854872856  | 0.859730812447276 | 04151 ; 05165 ; 04714 ; | NA                                 | KXJ78329.1 hypothei                                                                      | XP_001651908.2microtubule-associated serine/threonine-protein kinase 3 isoform X1        |
| AAEL0017 <sup>1</sup> uncharacterized LOC5572286                                      | -0.0854674133025281 | 0.696274413374934 | 0.916122517126697 | NA                      | NA                                 | XP_001846575.1 con                                                                       | XP_019562499.1 pigment-dispersing hormone peptides-like                                  |
| AAEL0013 <sup>1</sup> serine/arginine repetitive matrix protein 2                     | -0.085465342992774  | 0.691424158005078 | 0.916122517126697 | NA                      | NA                                 | KXJ68339.1 hypothei                                                                      | XP_001653059.1serine/arginine repetitive matrix protein 2                                |
| AAEL0141 <sup>1</sup> Y+L amino acid transporter 2                                    | -0.0852607493248512 | 0.553475296171197 | 0.874648750707084 | NA                      | NA                                 | XP_021704627.1Y+L amino acid transporter 2                                               | XP_021704627.1Y+L amino acid transporter 2                                               |
| AAEL0104 <sup>1</sup> glutamate dehydrogenase, mitochondrial                          | -0.0851522547943358 | 0.443352960093152 | 0.82545872799161  | NA                      | aag01100 ; aag NA                  | XP_001660861.1glutamate dehydrogenase, mitochondrial isoform X2                          | XP_001660861.1glutamate dehydrogenase, mitochondrial isoform X2                          |
| AAEL0028 <sup>1</sup> Down syndrome critical region protein 3 homolog                 | -0.0850528810392037 | 0.818559200121903 | 0.952837221640997 | NA                      | KXJ74314.1 hypothei                | XP_001662458.2Down syndrome critical region protein 3 homolog isoform X1                 | XP_001662458.2Down syndrome critical region protein 3 homolog isoform X1                 |
| AAEL0145 <sup>1</sup> protein-serine O-palmitoleyltransferase porcupine               | -0.0849351514115688 | 0.817553221960679 | 0.952514760254484 | NA                      | aag04310 NA                        | XP_021699864.1protein-serine O-palmitoleyltransferase porcupine isoform X1               | XP_021699864.1protein-serine O-palmitoleyltransferase porcupine isoform X1               |
| AAEL0196 <sup>1</sup> NA                                                              | -0.0848885858897568 | 0.434449642828839 | 0.820960220424486 | NA                      | NA                                 | XP_021698211.1synaptic vesicle membrane protein VAT-1 homolog-like                       | XP_021698211.1synaptic vesicle membrane protein VAT-1 homolog-like                       |
| AAEL0100 <sup>1</sup> DNA replication licensing factor MCM4                           | -0.0848728949177591 | 0.672241650276048 | 0.912897695097964 | NA                      | aag03030 NA                        | XP_021699399.1DNA replication licensing factor MCM4                                      | XP_021699399.1DNA replication licensing factor MCM4                                      |
| AAEL0151 <sup>1</sup> glycosylphosphatidylinositol anchor biosynthesis protein 11     | -0.0847409069295279 | 0.803710997249384 | 0.94649029363412  | NA                      | aag01100 ; aag NA                  | XP_021697526.1glycosylphosphatidylinositol anchor biosynthesis protein 11                | XP_021697526.1glycosylphosphatidylinositol anchor biosynthesis protein 11                |
| AAEL0090 <sup>1</sup> autophagy protein 12-like                                       | -0.084714994586113  | 0.673999854935629 | 0.930834351035592 | NA                      | aag04140 ; aag ETN65795.1 autophag | XP_001659704.1autophagy protein 12-like                                                  | XP_001659704.1autophagy protein 12-like                                                  |
| AAEL0095 <sup>1</sup> DNA-binding protein Ets9D                                       | -0.0846898918576254 | 0.727051101134399 | 0.912813925547137 | NA                      | NA                                 | XP_021713207.1DNA-binding protein Ets9D                                                  | XP_021713207.1DNA-binding protein Ets9D                                                  |
| AAEL0050 <sup>1</sup> multidrug resistance-associated protein 1                       | -0.0846544736438254 | 0.833444843319269 | 0.959902797120062 | NA                      | NA                                 | XP_019535568.1 PRE                                                                       | XP_021703626.1multidrug resistance                                                       |

|                                                                          |                      |                   |                   |                         |                                                                                    |                                                                                                   |
|--------------------------------------------------------------------------|----------------------|-------------------|-------------------|-------------------------|------------------------------------------------------------------------------------|---------------------------------------------------------------------------------------------------|
| AAEL00241 39S ribosomal protein L27, mitochondrial                       | -0.0833247542164681  | 0.663511793461328 | 0.911560991852962 | NA                      | aag03010                                                                           | XP_001864516.1 mit XP_001655229.239S ribosomal protein L27, mitochondrial                         |
| AAEL00745 NA                                                             | -0.0831317890485956  | 0.782805614104174 | 0.943962424451135 | NA                      | aag04150                                                                           | XP_001851546.1 TBC XP_021713262.1TBC1 domain family member 7-like                                 |
| AAEL02197 NA                                                             | -0.0829747332382238  | 0.703678113981527 | 0.917303584765266 | NA                      | NA                                                                                 | NA                                                                                                |
| AAEL0066: substance-K receptor                                           | -0.0829696856499368  | 0.792870123302267 | 0.945793949302124 | NA                      | NA                                                                                 | XP_019557995.1 PRE XP_021707016.1substance-K receptor                                             |
| AAEL0066: uncharacterized LOC5568215                                     | -0.0828630056916935  | 0.698379418728473 | 0.916606967023218 | NA                      | NA                                                                                 | XP_001849101.1 chr XP_019553168.1 titin-like                                                      |
| AAEL0089: uncharacterized protein CG5902                                 | -0.0827345712637808  | 0.685070322426116 | 0.914629465876247 | NA                      | NA                                                                                 | KXJ73192.1 hypothei XP_001845343.1AMME syndrome candidate gene 1 protein                          |
| AAEL0075: uncharacterized LOC5569299                                     | -0.0826233140344708  | 0.834159605452574 | 0.959972072207927 | NA                      | NA                                                                                 | KXJ75908.1 hypothei XP_001658422.1uncharacterized protein LOC5569299                              |
| AAEL0135: transcription factor grauzone                                  | -0.0826144260446621  | 0.665728025737685 | 0.911964500946328 | NA                      | NA                                                                                 | XP_001663746.1transcription factor grauzone                                                       |
| AAEL0078: serine/arginine repetitive matrix protein 1                    | -0.082573437094314   | 0.714211077386002 | 0.919699179136019 | NA                      | NA                                                                                 | KXJ82080.1 hypothei XP_001658699.2serine/arginine repetitive matrix protein 1                     |
| AAEL0046: uncharacterized LOC5565231                                     | -0.0824814500842545  | 0.664129603482005 | 0.911592424421865 | NA                      | NA                                                                                 | XP_001649562.2uncharacterized protein LOC5565231                                                  |
| AAEL0114: FACT complex subunit Ssrp1                                     | -0.0824665808858099  | 0.515097500432867 | 0.861448202130317 | NA                      | NA                                                                                 | ETN63178.1 structun XP_001655339.1FACT complex subunit Ssrp1                                      |
| AAEL0013: uncharacterized LOC5569814                                     | -0.0824003364738131  | 0.662147787185371 | 0.91036664241443  | NA                      | NA                                                                                 | KXJ78770.1 hypothei ABF18016.1secreted protein                                                    |
| AAEL0212: NA                                                             | -0.082347749268484   | 0.880847687542884 | 0.969743049934758 | NA                      | NA                                                                                 | XP_021693031.1limulus clotting factor C isoform X2                                                |
| AAEL0202: NA                                                             | -0.0821677476184575  | 0.607882795627672 | 0.893547770777888 | NA                      | NA                                                                                 | XP_021694801.1E3 ubiquitin-protein ligase UBR3                                                    |
| AAEL0200: NA                                                             | -0.0819727171426211  | 0.505347987413228 | 0.858744381072989 | NA                      | aag04341                                                                           | XP_019528061.1 protein roadkill isoform X3                                                        |
| AAEL0075: U3 small nucleolar RNA-associated protein 18 homolog           | -0.0819440237132317  | 0.579433940804903 | 0.882283691803025 | NA                      | aag03008                                                                           | KXJ79024.1 hypothei XP_001658467.1U3 small nucleolar RNA-associated protein 18 homolog            |
| AAEL0088: uncharacterized LOC5571093                                     | -0.0818243823078653  | 0.45399645689093  | 0.832617462606238 | NA                      | NA                                                                                 | KXJ80598.1 hypothei XP_021706131.1uncharacterized protein LOC5571093                              |
| AAEL0128: uncharacterized LOC5576917                                     | -0.0818103402962905  | 0.504268002039788 | 0.858744381072989 | NA                      | NA                                                                                 | XP_001663014.2uncharacterized protein LOC5576917                                                  |
| AAEL0093: NA                                                             | -0.0817296832418796  | 0.502255113713549 | 0.858744381072989 | NA                      | NA                                                                                 | XP_021711085.1uncharacterized protein LOC5571896                                                  |
| AAEL0181: NA                                                             | -0.0816573221905228  | 0.586306554957655 | 0.885466509029968 | NA                      | NA                                                                                 | XP_021704185.1protein maelstrom homolog                                                           |
| AAEL0044: protein yellow                                                 | -0.0815591310072767  | 0.469567403692746 | 0.840650460430825 | NA                      | NA                                                                                 | ETN62427.1 hypothe XP_021704367.1protein yellow                                                   |
| AAEL0182: NA                                                             | -0.081548331442698   | 0.796759349030756 | 0.945890571556554 | NA                      | NA                                                                                 | XP_021699545.1BMP-binding endothelial regulator protein                                           |
| AAEL0113: TBC1 domain family member 22B                                  | -0.0815006672900108  | 0.661695012129701 | 0.909942423634082 | NA                      | NA                                                                                 | KXJ70100.1 hypothei XP_021713381.1TBC1 domain family member 22B                                   |
| AAEL0096: UPF0235 protein C15orf40 homolog                               | -0.0813812625629999  | 0.82902763079098  | 0.957779316828242 | NA                      | NA                                                                                 | XP_001653923.1UPF0235 protein C15orf40 homolog                                                    |
| AAEL0096: estradiol 17-beta-dehydrogenase 11                             | -0.0813764801360353  | 0.480011915297835 | 0.845454613425911 | NA                      | NA                                                                                 | XP_001660285.1estradiol 17-beta-dehydrogenase 11                                                  |
| AAEL0229: NA                                                             | -0.0813587048839827  | 0.519161537279399 | 0.863892308507238 | NA                      | aag02010                                                                           | XP_021697020.1 ATP-binding cassette sub-family B member 8, mitochondrial                          |
| AAEL0266: NA                                                             | -0.0812795767612067  | 0.706388190000259 | 0.917845823832587 | NA                      | NA                                                                                 | XP_021696849.1NFX1-type zinc finger-containing protein 1                                          |
| AAEL0101: sodium/potassium-transporting ATPase subunit beta-2            | -0.0812280248388617  | 0.50958192805199  | 0.860803070787677 | NA                      | NA                                                                                 | XP_011493072.1sodium/potassium-transporting ATPase subunit beta-2 isoform X1                      |
| AAEL0043: 60S ribosomal protein L5                                       | -0.0811671183224203  | 0.57262595807131  | 0.880923047085115 | NA                      | aag03010                                                                           | ETN65819.1 60S ribo XP_001648896.160S ribosomal protein L5                                        |
| AAEL0290: NA                                                             | -0.08115463745022    | 0.568174959351304 | 0.880422457819946 | 00790 ; 00730           | NA                                                                                 | XP_001663539.2uncharacterized protein LOC5577765                                                  |
| AAEL0195: NA                                                             | -0.0811071690538087  | 0.4702326211536   | 0.841189204342035 | 4070                    | aag04070                                                                           | XP_021696387.1inositol hexakisphosphate and diphosphoinositol-pentakisphosphate kinase isoform X8 |
| AAEL0078: 39S ribosomal protein L4, mitochondrial                        | -0.0810231001570431  | 0.646904227539961 | 0.906554905014882 | NA                      | aag03010                                                                           | KXJ73214.1 hypothei XP_001650271.239S ribosomal protein L4, mitochondrial                         |
| AAEL0071: trafficking protein particle complex subunit 4                 | -0.0809369669004278  | 0.651060068154997 | 0.906932039402093 | NA                      | NA                                                                                 | KFB49458.1 AGAP00 XP_021702147.1trafficking protein particle complex subunit 4                    |
| AAEL0002: probable cytosolic oligopeptidase A                            | -0.080917772815238   | 0.472286568438628 | 0.84283732647081  | NA                      | NA                                                                                 | KXJ77549.1 hypothei XP_001660130.1probable cytosolic oligopeptidase A                             |
| AAEL0173: vesicle transport through interaction with t-SNAREs homolog 1A | -0.0808982544902908  | 0.76826039904083  | 0.940223295572825 | NA                      | aag04130                                                                           | XP_011493488.1vesicle transport through interaction with t-SNAREs homolog 1A                      |
| AAEL0175: putative SERF-like protein                                     | -0.0807006669243263  | 0.486509575666207 | 0.848528684036191 | NA                      | NA                                                                                 | XP_011493374.1putative SERF-like protein                                                          |
| AAEL0062: uncharacterized LOC5567606                                     | -0.080594498513489   | 0.72598562483029  | 0.92317786750456  | 901                     | NA                                                                                 | KXJ69094.1 hypothei XP_001657583.2uncharacterized protein LOC5567606                              |
| AAEL0133: protein lethal(2)essential for life                            | -0.0803680303142567  | 0.631620708062269 | 0.902506916959539 | NA                      | aag04141 ; aag NA                                                                  | XP_001663495.1protein lethal(2)essential for life                                                 |
| AAEL0002: peptide deformylase, mitochondrial                             | -0.0802716538347654  | 0.701453711630327 | 0.916878235043446 | NA                      | NA                                                                                 | KXJ78959.1 hypothei XP_001654759.2peptide deformylase, mitochondrial                              |
| AAEL0137: transcription factor grauzone                                  | -0.0802622766750741  | 0.785287936450868 | 0.944372632355572 | NA                      | NA                                                                                 | XP_001663979.1transcription factor grauzone                                                       |
| AAEL0238: NA                                                             | -0.0801069484883485  | 0.516185484371285 | 0.861448202130317 | 00970 ; 00860 ; 00970   | aag01100 ; aag NA                                                                  | XP_021712876.1bifunctional glutamate/proline--tRNA ligase                                         |
| AAEL0238: NA                                                             | -0.0801017304684329  | 0.671270469482028 | 0.912812708172959 | NA                      | NA                                                                                 | XP_021698611.1uncharacterized protein LOC5570598                                                  |
| AAEL0120: uncharacterized LOC5575821                                     | -0.0800306537213064  | 0.784484129689086 | 0.944372632355572 | NA                      | NA                                                                                 | KXJ76206.1 hypothei XP_019562173.1 dual specificity protein kinase splA                           |
| AAEL0198: NA                                                             | -0.079883863039261   | 0.756040858670738 | 0.934121717033935 | NA                      | NA                                                                                 | XP_021699829.1ankyrin repeat domain-containing protein SOWAHA isoform X1                          |
| AAEL0061: coiled-coil domain-containing protein 134                      | -0.079657952524032   | 0.750397477628484 | 0.932554085844433 | NA                      | NA                                                                                 | KXJ80453.1 hypothei XP_001657522.1coiled-coil domain-containing protein 134                       |
| AAEL0104: probable ATP-dependent RNA helicase DDX43                      | -0.079653791692842   | 0.488617617338798 | 0.84884683445739  | NA                      | NA                                                                                 | XP_021693457.1probable ATP-dependent RNA helicase DDX43                                           |
| AAEL0034: uncharacterized LOC5578210                                     | -0.0796449444666459  | 0.603096458997897 | 0.892951506950708 | NA                      | NA                                                                                 | ABF18223.1hemolymph protein-like protein                                                          |
| AAEL0273: NA                                                             | -0.079620106628299   | 0.688835294341112 | 0.916010156153545 | NA                      | aag04140                                                                           | XP_021710559.1AFA/FMR2 family member 4 isoform X2                                                 |
| AAEL0276: NA                                                             | -0.079580006341484   | 0.846606582248501 | 0.963198678766584 | NA                      | NA                                                                                 | XP_021699374.1proteoglycan 4-like                                                                 |
| AAEL0290: NA                                                             | -0.0795516720038969  | 0.470775305639822 | 0.841342855408359 | 00650 ; 00071 ; 00627 ; | aag01100 ; aag NA                                                                  | XP_001655993.1hydroxyacyl-coenzyme A dehydrogenase, mitochondrial isoform X1                      |
| AAEL0066: putative oxidoreductase GLYR1 homolog                          | -0.0794228548838367  | 0.588949853071868 | 0.88684610505111  | NA                      | KXJ80367.1 hypothei XP_021701587.1putative oxidoreductase GLYR1 homolog isoform X1 |                                                                                                   |
| AAEL0136: thymosin beta                                                  | -0.0793885772398206  | 0.479208535237115 | 0.845454613425911 | NA                      | NA                                                                                 | XP_001663844.1thymosin beta                                                                       |
| AAEL0212: NA                                                             | -0.0793245465272039  | 0.538816231516414 | 0.869670565558805 | NA                      | NA                                                                                 | XP_021698892.1CKLF-like MARVEL transmembrane domain-containing protein 4                          |
| AAEL0011: fatty-acid amide hydrolase 2                                   | -0.0793006139274288  | 0.608699347229479 | 0.893547770777888 | 970                     | NA                                                                                 | KFB39538.1 AGAP00 XP_001658184.1fatty-acid amide hydrolase 2                                      |
| AAEL0010: transcription factor grauzone                                  | -0.0792767765009914  | 0.789629846447018 | 0.945746953924959 | NA                      | NA                                                                                 | KXJ71627.1 hypothei XP_001657707.1transcription factor grauzone                                   |
| AAEL0196: NA                                                             | -0.079255197553139   | 0.768565546138766 | 0.940470765368209 | NA                      | aag04144 ; aag NA                                                                  | XP_021706708.1G protein-coupled receptor kinase 1                                                 |
| AAEL0196: NA                                                             | -0.079217464820008   | 0.843856217003856 | 0.963198678766584 | NA                      | NA                                                                                 | XP_021699564.1uncharacterized protein LOC23687899 isoform X1                                      |
| AAEL0121: delta(24)-sterol reductase                                     | -0.0791758867755789  | 0.74562372966136  | 0.931365937538534 | 100                     | aag01100 ; aag XP_001842235.1 24- XP_001655874.2delta(24)-sterol reductase         |                                                                                                   |
| AAEL0016: probable ATP-dependent RNA helicase DDX23                      | -0.0791460629681583  | 0.61973633131139  | 0.897318336565571 | NA                      | aag03040                                                                           | KXJ78316.1 hypothei XP_021701189.1probable ATP-dependent RNA helicase DDX23                       |
| AAEL0022: zinc finger protein 665                                        | -0.0791386565186645  | 0.688102913126933 | 0.916010156153545 | NA                      | NA                                                                                 | KXJ70419.1 hypothei XP_021708028.1zinc finger protein 665                                         |
| AAEL0100: MICOS complex subunit Mic60                                    | -0.07906681800433659 | 0.510643780854206 | 0.860452247709668 | NA                      | NA                                                                                 | XP_001660551.2MICOS complex subunit Mic60 isoform X2                                              |
| AAEL0008: probable serine/threonine-protein kinase kinX                  | -0.0790344537971171  | 0.532020673238575 | 0.866700945213732 | NA                      | NA                                                                                 | XP_021708669.1probable serine/threonine-protein kinase kinX isoform X3                            |
| AAEL0057: hormone-sensitive lipase                                       | -0.0789429305757589  | 0.577977707294054 | 0.882161363828145 | NA                      | NA                                                                                 | KXJ82042.1 hypothei XP_021710981.1hormone-sensitive lipase                                        |
| AAEL0014: transmembrane protein 47                                       | -0.0789320957942904  | 0.47970462754399  | 0.845454613425911 | NA                      | NA                                                                                 | XP_019553392.1 PRE XP_001659307.2transmembrane protein 47 isoform X2                              |
| AAEL0122: cytoplasmic dynein 1 intermediate chain                        | -0.0788683115239988  | 0.512337641390096 | 0.861177338330732 | NA                      | aag04145                                                                           | XP_019563275.1 PRE XP_019563319.1 cytoplasmic dynein 1 intermediate chain-like isoform X10        |
| AAEL0098: 39S ribosomal protein L46, mitochondrial                       | -0.0788100843590861  | 0.660304856133373 | 0.909580313002131 | NA                      | NA                                                                                 | XP_001660444.239S ribosomal protein L46, mitochondrial                                            |
| AAEL0238: NA                                                             | -0.0787426745789837  | 0.487104073667883 | 0.84884683445739  | 04151 ; 05165 ; 04714 ; | aag04141 ; aag NA                                                                  | XP_021710632.1serine/threonine-protein kinase/endoribonuclease IRE1                               |
| AAEL0119: glutamate decarboxylase                                        | -0.0785892552859088  | 0.533887871983773 | 0.866700945213732 | NA                      | aag01100 ; aag KFB52927.1 AGAP00 XP_001655801.1glutamate decarboxylase             |                                                                                                   |
| AAEL0104: oxysterol-binding protein-related protein 8                    | -0.0785238621713662  | 0.485361580189137 | 0.847655581875201 | NA                      | NA                                                                                 | XP_021693597.1oxysterol-binding protein-related protein 8 isoform X3                              |
| AAEL0150: uncharacterized LOC5566075                                     | -0.0784531471745554  | 0.746641502482336 | 0.931365937538534 | NA                      | NA                                                                                 | XP_001650439.2uncharacterized protein LOC5566075                                                  |
| AAEL0149: uncharacterized LOC5565630                                     | -0.0783264657049487  | 0.551238309886166 | 0.874531710113044 | NA                      | NA                                                                                 | XP_001649986.2uncharacterized protein LOC5565630                                                  |
| AAEL0094: CCR4-NOT transcription complex subunit 7                       | -0.0783124658601513  | 0.506944337686989 | 0.859256178927183 | NA                      | aag03018                                                                           | XP_001660002.1CCR4-NOT transcription complex subunit 7 isoform X1                                 |
| AAEL0110: L-selectin                                                     | -0.0782797176700743  | 0.682756314657947 | 0.914629465876247 | NA                      | NA                                                                                 | KFB45679.1 AGAP01 XP_019550727.1 L-selectin                                                       |
| AAEL0022: palmitoyltransferase Z                                         |                      |                   |                   |                         |                                                                                    |                                                                                                   |

|                                                                           |                      |                    |                   |                         |                      |                                                                             |                                                                                          |
|---------------------------------------------------------------------------|----------------------|--------------------|-------------------|-------------------------|----------------------|-----------------------------------------------------------------------------|------------------------------------------------------------------------------------------|
| AAEL0199f NA                                                              | -0.0777637063563855  | 0.791749597136825  | 0.945793949302124 | NA                      | NA                   | NA                                                                          | XP_021699296.1zinc finger protein 431                                                    |
| AAEL0196f NA                                                              | -0.0777216178861191  | 0.52112109169831   | 0.86496325015846  | NA                      | NA                   | NA                                                                          | XP_019549401.2 titin-like                                                                |
| AAEL0127f ATP synthase lipid-binding protein, mitochondrial               | -0.077677236088231   | 0.617610047461961  | 0.897318336565571 | aag01100 ; aag          | ETN66401.1 mitocho   | XP_021695120.1ATP synthase lipid-binding protein, mitochondrial             |                                                                                          |
| AAEL0049f RNA-binding protein 5-A                                         | -0.077526045118396   | 0.573713122350263  | 0.881197098233729 | NA                      | NA                   | KXJ83217.1 hypothei                                                         | XP_021700881.1RNA-binding protein 5-A                                                    |
| AAEL0119f melanotransferrin                                               | -0.0774891852840751  | 0.538110760711348  | 0.869670565558805 | NA                      | NA                   | NA                                                                          | XP_021699710.1melanotransferrin isoform X2                                               |
| AAEL0002f probable RNA-binding protein 18                                 | -0.0774850566752272  | 0.774050723235535  | 0.941230906703049 | NA                      | NA                   | XP_019552667.1 PRE                                                          | XP_001654782.2probable RNA-binding protein 18 isoform X1                                 |
| AAEL0065f tropoin C                                                       | -0.0774567953443336  | 0.585766765819794  | 0.885239904594145 | NA                      | NA                   | XP_019553231.1 PRE                                                          | XP_001652068.1tropoin C isoform X3                                                       |
| AAEL0101f uncharacterized LOC5572959                                      | -0.0773170527756788  | 0.567599531858109  | 0.880302387766415 | NA                      | NA                   | NA                                                                          | XP_001654288.2uncharacterized protein LOC5572959 isoform X2                              |
| AAEL0010f mucin-6                                                         | -0.077149178496764   | 0.620086800928974  | 0.897385728224103 | NA                      | NA                   | NA                                                                          | XP_001657867.2mucin-6 isoform X2                                                         |
| AAEL0076f 60S ribosomal protein L9                                        | -0.07707728329208878 | 0.606341168403405  | 0.893547770777888 | aag03010                | AAV84245.1 ribosom   | XP_001652827.160S ribosomal protein L9                                      |                                                                                          |
| AAEL0073f 8-oxo-dGDP phosphatase NUDT18                                   | -0.0770295488276247  | 0.692847454459106  | 0.916122517126697 | NA                      | NA                   | ETN59927.1 Nudt18                                                           | XP_001658319.18-oxo-dGDP phosphatase NUDT18                                              |
| AAEL0086f uncharacterized LOC5570833                                      | -0.0769160127409731  | 0.6773171319309352 | 0.914481546525978 | NA                      | ETN64902.1 hypothe   | XP_001653341.1uncharacterized protein LOC5570833                            |                                                                                          |
| AAEL0241f NA                                                              | -0.076734655219075   | 0.480143147042576  | 0.845454613425911 | NA                      | NA                   | NA                                                                          | XP_021697761.1MOG interacting and ectopic P-granules protein 1 isoform X1                |
| AAEL0280f NA                                                              | -0.0767340298866929  | 0.52693282577448   | 0.865973876319045 | NA                      | NA                   | NA                                                                          | XP_021694803.1uncharacterized protein LOC5564091 isoform X1                              |
| AAEL0197f NA                                                              | -0.0767302175678739  | 0.50252516208677   | 0.858744381072989 | aag03015 ; aag          | NA                   | XP_021713312.1protein phosphatase PP2A 55 kDa regulatory subunit isoform X1 |                                                                                          |
| AAEL0104f protein THEM6                                                   | -0.0764763324197749  | 0.614805432895916  | 0.896845306410123 | NA                      | NA                   | NA                                                                          | XP_021693612.1protein THEM6                                                              |
| AAEL0019f NA                                                              | -0.0764619019722756  | 0.498965645355349  | 0.856939505134695 | NA                      | NA                   | NA                                                                          | XP_021703213.1uncharacterized protein LOC5573115 isoform X3                              |
| AAEL0006f putative uncharacterized protein DDB_G0282129                   | -0.076415601207411   | 0.608951596550333  | 0.893547770777888 | NA                      | NA                   | NA                                                                          | XP_021700939.1putative uncharacterized protein DDB_G0282129                              |
| AAEL0221f NA                                                              | -0.076310384463729   | 0.728639015562182  | 0.923566968708516 | NA                      | NA                   | NA                                                                          | XP_021694198.1homeotic protein antennapedia isoform X2                                   |
| AAEL0117f ARL14 effector protein                                          | -0.0762481441493362  | 0.853559885797843  | 0.964653958545747 | NA                      | NA                   | ETN65519.1 hypothe                                                          | XP_001655655.1ARL14 effector protein                                                     |
| AAEL0089f myosin regulatory light chain sqh                               | -0.0761984439486752  | 0.575701247230054  | 0.88173468538301  | NA                      | NA                   | XP_003437136.1 AG                                                           | XP_001653523.2myosin regulatory light chain sqh isoform X1                               |
| AAEL0218f NA                                                              | -0.076168977663898   | 0.835452352754482  | 0.961219373599242 | NA                      | NA                   | NA                                                                          | XP_021697346.1uncharacterized protein LOC5576646                                         |
| AAEL0075f serine protease snake                                           | -0.0760585068381865  | 0.479384376471686  | 0.845454613425911 | NA                      | NA                   | PRE                                                                         | XP_001658478.3serine protease snake isoform X1                                           |
| AAEL0147f pyrimidine-specific ribonucleoside hydrolase RiHa               | -0.0760238092621155  | 0.692827333560931  | 0.916122517126697 | NA                      | NA                   | AAR18422.1salivary purine nucleosidase                                      |                                                                                          |
| AAEL0202f NA                                                              | -0.075889932866305   | 0.6173703899890651 | 0.897318336565571 | NA                      | NA                   | XP_001658237.2protein phosphatase 1 regulatory subunit 21                   |                                                                                          |
| AAEL0024f LIM and senescent cell antigen-like-containing domain protein 1 | -0.0758884399727057  | 0.700081000579772  | 0.916629842461068 | NA                      | NA                   | XP_019554031.1 PRE                                                          | XP_021709512.1LIM and senescent cell antigen-like-containing domain protein 1 isoform X1 |
| AAEL0016f serine protease SP24D                                           | -0.0758353772874012  | 0.8615852577261242 | 0.96610329632302  | NA                      | NA                   | XP_019539612.1 PRE                                                          | XP_001659970.2serine protease SP24D                                                      |
| AAEL0117f actin-interacting protein 1                                     | -0.0757833016866653  | 0.572512153852159  | 0.880923047085115 | NA                      | NA                   | ETN60327.1 wd-repe                                                          | XP_001661907.1actin-interacting protein 1                                                |
| AAEL0059f uncharacterized LOC5579875                                      | -0.0756187049203488  | 0.628720933056726  | 0.90104585683245  | NA                      | NA                   | XP_021695533.1uncharacterized protein LOC5579875 isoform X2                 |                                                                                          |
| AAEL0031f neuroligin-4, X-linked                                          | -0.0755225841498933  | 0.637970016416759  | 0.903725383477066 | NA                      | NA                   | KXJ81478.1 hypothei                                                         | XP_001656324.2neuroligin-4, X-linked isoform X1                                          |
| AAEL0014f laminin subunit alpha-1                                         | -0.0754682407030433  | 0.761227007290571  | 0.936472047952049 | aag04512                | KFB44910.1 laminin ; | XP_021700675.1laminin subunit alpha-1 isoform X3                            |                                                                                          |
| AAEL0031f adenylosuccinate synthetase                                     | -0.0752996976283539  | 0.509421881867972  | 0.860083070787677 | 00230 ; 00250           | aag01100 ; aag       | XP_001845298.1 ade                                                          | XP_001656488.1adenylosuccinate synthetase                                                |
| AAEL0255f NA                                                              | -0.075269314017239   | 0.722275587833684  | 0.921934742632737 | NA                      | aag04120             | NA                                                                          | XP_021694075.1cell division cycle protein 16 homolog                                     |
| AAEL0021f sulfide:quinone oxidoreductase, mitochondrial                   | -0.075252349699774   | 0.564516759061862  | 0.88015642413293  | aag01100 ; aag          | KXJ80400.1 hypothei  | XP_001654715.2sulfide:quinone oxidoreductase, mitochondrial                 |                                                                                          |
| AAEL0233f NA                                                              | -0.074975325432019   | 0.522476454250826  | 0.865018698932415 | NA                      | NA                   | NA                                                                          | XP_021705248.1putative leucine-rich repeat-containing protein DDB_G0290503               |
| AAEL0126f uncharacterized LOC5576551                                      | -0.07480480949543049 | 0.7282391335532027 | 0.923566968708516 | NA                      | NA                   | NA                                                                          | XP_021697853.1uncharacterized protein LOC5576551                                         |
| AAEL0096f protein lingerer                                                | -0.0747527700047775  | 0.5414804949585277 | 0.869735874782513 | NA                      | NA                   | NA                                                                          | XP_021698801.1protein lingerer isoform X1                                                |
| AAEL0123f vitellogenin-1                                                  | -0.0747220492646217  | 0.519496572032829  | 0.86480021844267  | NA                      | NA                   | KXJ68117.1 hypothei                                                         | XP_019534645.1 vitellogenin-1-like                                                       |
| AAEL0121f bone morphogenetic protein receptor type-1B                     | -0.0746680005028414  | 0.644582969605598  | 0.906554905014882 | NA                      | NA                   | XP_019533279.1 PRE                                                          | XP_021702939.1bone morphogenetic protein receptor type-1B isoform X1                     |
| AAEL0137f F-actin-capping protein subunit alpha                           | -0.0746142337836621  | 0.524093792511049  | 0.865215478807089 | aag04144                | NA                   | XP_001657019.1F-actin-capping protein subunit alpha                         |                                                                                          |
| AAEL0088f uncharacterized LOC5571211                                      | -0.074603487842216   | 0.730522556075797  | 0.924658674141607 | NA                      | NA                   | KXJ75484.1 hypothei                                                         | XP_021708731.1uncharacterized protein LOC5571211                                         |
| AAEL0195f NA                                                              | -0.0745928634720641  | 0.512987651617879  | 0.861297436611866 | 00030 ; 00680 ; 00710 ; | NA                   | NA                                                                          | XP_021695290.1vacuolar protein sorting-associated protein 41 homolog                     |
| AAEL0171f probable 60S ribosomal protein L37-A                            | -0.0745278888355783  | 0.611233471778091  | 0.894664631231935 | aag03010                | NA                   | NA                                                                          | XP_011493218.1probable 60S ribosomal protein L37-A                                       |
| AAEL0073f uncharacterized LOC5569132                                      | -0.0744118177236992  | 0.649050130842301  | 0.906581557985861 | NA                      | NA                   | KXJ81144.1 hypothei                                                         | XP_019556612.1 orcokinin peptides type B-like                                            |
| AAEL0000f serine protease easter                                          | -0.0743922326566256  | 0.534280166923441  | 0.866700945213732 | NA                      | NA                   | KXJ68341.1 hypothei                                                         | XP_001647864.2serine protease easter                                                     |
| AAEL0075f carnitine O-palmitoyltransferase 2, mitochondrial               | -0.0743045471083358  | 0.642922018608325  | 0.905972350539329 | aag01212 ; aag          | KXJ74976.1 hypothei  | XP_021701616.1carnitine O-palmitoyltransferase 2, mitochondrial             |                                                                                          |
| AAEL0090f rho GTPase-activating protein 68F                               | -0.0742618093206388  | 0.52293281337425   | 0.858744381072989 | NA                      | KFB40302.1 rho/rac/  | XP_021695479.1rho GTPase-activating protein 68F                             |                                                                                          |
| AAEL0140f uncharacterized LOC5579199                                      | -0.0742302924371519  | 0.594327274855939  | 0.888690215018581 | NA                      | NA                   | NA                                                                          | KFB40169.1AGAP000669-like protein                                                        |
| AAEL0132f uncharacterized LOC5577555                                      | -0.0742120600409056  | 0.6942876239256    | 0.916122517126697 | NA                      | NA                   | NA                                                                          | XP_019549496.1 beta-1,4-galactosyltransferase galt-1-like                                |
| AAEL0194f NA                                                              | -0.074131724942119   | 0.522014476410209  | 0.865018698932415 | NA                      | NA                   | NA                                                                          | XP_011493090.2protein tamozhennic                                                        |
| AAEL0268f NA                                                              | -0.0741116470777641  | 0.665264291796133  | 0.911964500946328 |                         |                      |                                                                             |                                                                                          |

|                                                                                     |                      |                     |                   |                         |                     |                                                                      |                                                                                                             |
|-------------------------------------------------------------------------------------|----------------------|---------------------|-------------------|-------------------------|---------------------|----------------------------------------------------------------------|-------------------------------------------------------------------------------------------------------------|
| AAEL01004: calcitonin gene-related peptide type 1 receptor                          | -0.0720449903305556  | 0.72469425847737    | 0.92261158916834  | NA                      | aag04080            | NA                                                                   | XP_021703099.1calcitonin gene-related peptide type 1 receptor isoform X1                                    |
| AAEL00311: protein SMG8                                                             | -0.071842633083325   | 0.719997430356615   | 0.921583569204186 | NA                      | NA                  | KXJ68880.1 hypothei                                                  | XP_001656499.1protein SMG8                                                                                  |
| AAEL00095: uncharacterized LOC5567847                                               | -0.0716900879780318  | 0.526444976351677   | 0.865680248818465 | NA                      | NA                  | NA                                                                   | XP_001657708.2uncharacterized protein LOC5567847 isoform X7                                                 |
| AAEL00181: ski oncogene                                                             | -0.0714637179103123  | 0.760091260917131   | 0.935871383184374 | NA                      | NA                  | NA                                                                   | XP_021700818.1ski oncogene isoform X2                                                                       |
| AAEL01423: mitochondrial amidoxime-reducing component 1                             | -0.0714463554643103  | 0.634346070422862   | 0.902506916959539 | 790                     | NA                  | NA                                                                   | XP_001648335.2mitochondrial amidoxime-reducing component 1 isoform X2                                       |
| AAEL0244E: NA                                                                       | -0.0714392445897776  | 0.868918211607971   | 0.968652831735134 | NA                      | NA                  | NA                                                                   | CRL06716.1CLUMA_CG019625, isoform A                                                                         |
| AAEL0046E: chitooligosaccharidolytic beta-N-acetylglucosaminidase                   | -0.0713328890974892  | 0.546568691190384   | 0.871064270324484 | 00513 ; 00603 ; 00604 ; | aag01100 ; aag      | XP_001864406.1 chit                                                  | XP_021696980.1chitooligosaccharidolytic beta-N-acetylglucosaminidase isoform X2                             |
| AAEL00124: poly(rC)-binding protein 3                                               | -0.0711001083408126  | 0.74039633124493    | 0.928618984286445 | NA                      | NA                  | NA                                                                   | XP_021698537.1poly(rC)-binding protein 3 isoform X7                                                         |
| AAEL0213E: NA                                                                       | -0.0709875332689242  | 0.693406149597391   | 0.916122517126697 | 04660 ; 04151 ; 05165 ; | NA                  | NA                                                                   | XP_019537705.1 activated CDC42 kinase 1                                                                     |
| AAEL00784: protein wntless                                                          | -0.070894173395801   | 0.705811210291156   | 0.917749125552377 | NA                      | NA                  | KXJ75542.1 hypothei                                                  | XP_001658688.2protein wntless                                                                               |
| AAEL00883: kinase D-interacting substrate of 220 kDa                                | -0.070840813722345   | 0.526918692991325   | 0.865973876319045 | NA                      | NA                  | NA                                                                   | XP_021704252.1kinase D-interacting substrate of 220 kDa isoform X6                                          |
| AAEL00095: ARF GTPase-activating protein GIT2                                       | -0.07072779597415295 | 0.668324802627089   | 0.912587154440492 | aag04144                | NA                  | NA                                                                   | XP_001660508.1ARF GTPase-activating protein GIT2                                                            |
| AAEL0142E: putative ATP-dependent RNA helicase DHX33                                | -0.0706899462162743  | 0.680895039591484   | 0.914629465876247 | NA                      | NA                  | NA                                                                   | XP_001648316.1putative ATP-dependent RNA helicase DHX33                                                     |
| AAEL0042E: uncharacterized LOC5564403                                               | -0.0706409215654883  | 0.66895925169191    | 0.912812708172959 | aag04144                | NA                  | NA                                                                   | XP_001648746.2uncharacterized protein LOC5564403 isoform X5                                                 |
| AAEL0021E: putative hydroxypyruvate isomerase                                       | -0.070619632315566   | 0.755247488624216   | 0.934127170333935 | NA                      | aag01100 ; aag      | KXJ717101.1 hypothei                                                 | XP_001654840.2putative hydroxypyruvate isomerase                                                            |
| AAEL01994: NA                                                                       | -0.07046543720687    | 0.664979794205977   | 0.911808086169482 | NA                      | NA                  | NA                                                                   | XP_001658934.2uncharacterized protein LOC5570044 isoform X1                                                 |
| AAEL00091: glutactin                                                                | -0.0704444022090362  | 0.736390489213234   | 0.927923722242795 | NA                      | NA                  | XP_019524869.1 PRE                                                   | XP_001651646.3glutactin isoform X1                                                                          |
| AAEL0030E: focadhesin                                                               | -0.070430061467061   | 0.721316606570684   | 0.921583569204186 | NA                      | NA                  | KXJ83169.1 hypothei                                                  | XP_019554266.1 focadhesin-like isoform X1                                                                   |
| AAEL0024E: cytoplasmic polyadenylation element-binding protein 1                    | -0.070198380838132   | 0.59543773721862    | 0.889050526332724 | NA                      | aag04320            | XP_001851543.1 cyt                                                   | XP_021709672.1cytoplasmic polyadenylation element-binding protein 1                                         |
| AAEL0083E: 60S ribosomal protein L24                                                | -0.0699117925908975  | 0.625852330698049   | 0.89957186361051  | aag03010                | ACJ74462.1 ribosom: | XP_001659139.160S                                                    | ribosomal protein L24                                                                                       |
| AAEL0068E: insulin-like growth factor 2 mRNA-binding protein 1                      | -0.0697856801515173  | 0.765794242086548   | 0.939178856256477 | NA                      | NA                  | NA                                                                   | XP_001652287.1insulin-like growth factor 2 mRNA-binding protein 1 isoform X5                                |
| AAEL0225E: NA                                                                       | -0.0696761223490499  | 0.818640629677649   | 0.95283721640997  | aag03420 ; aag          | NA                  | NA                                                                   | XP_021693415.1DNA excision repair protein ERCC-1                                                            |
| AAEL0122E: microtubule-associated protein tau                                       | -0.0695735055722206  | 0.60444122016478    | 0.893545770777888 | NA                      | NA                  | NA                                                                   | XP_021708281.1microtubule-associated protein tau isoform X6                                                 |
| AAEL0098E: low-density lipoprotein receptor-related protein                         | -0.0694143759644101  | 0.720908952646889   | 0.921583569204186 | aag04150 ; aag          | NA                  | NA                                                                   | XP_021709286.1low-density lipoprotein receptor-related protein 6                                            |
| AAEL0033E: 60S ribosomal protein L32                                                | -0.0693800659801504  | 0.619187092060692   | 0.897318336565571 | aag03010                | ETN60962.1 60S ribo | XP_001656734.160S                                                    | ribosomal protein L32                                                                                       |
| AAEL0029E: protein Mo25                                                             | -0.0692808946719131  | 0.537588693173007   | 0.869400906774532 | NA                      | aag04150            | ETN61034.1 calcium                                                   | XP_019546170.1 protein Mo25                                                                                 |
| AAEL0146E: cytochrome c-type heme lyase                                             | -0.0692069157201878  | 0.533003428788782   | 0.866700945213732 | 860                     | aag00860            | NA                                                                   | XP_001649157.2cytochrome c-type heme lyase                                                                  |
| AAEL0107E: gamma-aminobutyric acid receptor subunit beta-like                       | -0.0690384335734276  | 0.879745328075011   | 0.96652646055335  | NA                      | aag04080            | XP_019559721.1 PRE                                                   | XP_021694936.1gamma-aminobutyric acid receptor subunit beta-like                                            |
| AAEL0112E: aminocyclase-1B                                                          | -0.0689730616014154  | 0.53850437832442    | 0.866700945213732 | 220                     | aag01100 ; aag      | KXJ751210.1 hypothei                                                 | XP_001655181.1aminocyclase-1B isoform X1                                                                    |
| AAEL0007E: ubiquitin-like modifier-activating enzyme 1                              | -0.068949470317875   | 0.539023068184697   | 0.869670565558805 | NA                      | aag04120            | KXJ68405.1 hypothei                                                  | XP_001650993.1 ubiquitin-like modifier-activating enzyme 1                                                  |
| AAEL0044E: venom allergen 5                                                         | -0.0689340150837965  | 0.63247796915734    | 0.902506916959539 | NA                      | NA                  | KXJ74537.1 hypothei                                                  | XP_001649072.2venom allergen 5                                                                              |
| AAEL0250E: NA                                                                       | -0.0689260518686356  | 0.800695414838381   | 0.946215055875588 | NA                      | NA                  | NA                                                                   | XP_021697716.1uncharacterized protein LOC110675945                                                          |
| AAEL0280E: NA                                                                       | -0.0688475172058958  | 0.528020626115576   | 0.865973876319045 | NA                      | NA                  | NA                                                                   | XP_021702518.1trafficking kinesin-binding protein milt isoform X5                                           |
| AAEL0048E: actin-related protein 6                                                  | -0.0688153965844082  | 0.859935857337694   | 0.965722450478577 | NA                      | KFB48552.1 AGAP00   | XP_001649905.1actin-related protein 6                                |                                                                                                             |
| AAEL0091E: protein CREBRF homolog                                                   | -0.0687768849408778  | 0.542738984539655   | 0.869900911343623 | NA                      | NA                  | XP_001843294.1 con                                                   | XP_001659791.1protein CREBRF homolog isoform X2                                                             |
| AAEL0130E: uncharacterized LOC5577109                                               | -0.0687586706506633  | 0.843149056173431   | 0.963198678766584 | NA                      | NA                  | NA                                                                   | XP_001663195.2uncharacterized protein LOC5577109                                                            |
| AAEL0194E: NA                                                                       | -0.068745840271582   | 0.676069835545077   | 0.914438668403353 | NA                      | NA                  | NA                                                                   | XP_021696570.1rab GTPase-activating protein 1-like isoform X1                                               |
| AAEL0039E: proton-coupled amino acid transporter-like protein pathetic              | -0.0686798382745086  | 0.62328424459518    | 0.898271200863489 | NA                      | NA                  | XP_001861307.1 am                                                    | XP_001648128.2proton-coupled amino acid transporter-like protein pathetic                                   |
| AAEL0079E: P protein                                                                | -0.0684997656538032  | 0.565541479109744   | 0.880302387766415 | NA                      | NA                  | XP_019551327.1 PRE                                                   | XP_021703426.1P protein                                                                                     |
| AAEL0086E: SAP30-binding protein                                                    | -0.0684680745984836  | 0.709517618813252   | 0.918410624324032 | NA                      | NA                  | KXJ82294.1 hypothei                                                  | XP_001659382.1SAP30-binding protein                                                                         |
| AAEL0002E: ubiquinone biosynthesis protein COQ9, mitochondrial                      | -0.0683941029674694  | 0.579302436430474   | 0.882783691803025 | NA                      | NA                  | XP_001688565.1 AG                                                    | XP_021699957.1ubiquinone biosynthesis protein COQ9, mitochondrial isoform X3                                |
| AAEL0105E: mesoderm induction early response protein 1                              | -0.0683866969726675  | 0.711521141158363   | 0.918935795219545 | NA                      | NA                  | XP_021701422.1mesoderm induction early response protein 1 isoform X1 |                                                                                                             |
| AAEL0070E: neutral ceramidase                                                       | -0.0683800914673916  | 0.656528935719693   | 0.909161665386398 | 600                     | aag01100 ; aag      | KXJ78038.1 hypothei                                                  | XP_001658093.2neutral ceramidase                                                                            |
| AAEL0094E: PHD finger protein 20-like protein 1                                     | -0.0683800425750408  | 0.686933168393892   | 0.916010156153545 | NA                      | NA                  | NA                                                                   | XP_021708662.1PHD finger protein 20-like protein 1                                                          |
| AAEL0103E: caprin homolog                                                           | -0.0683562062841616  | 0.54055562062841616 | 0.869735874782513 | NA                      | NA                  | NA                                                                   | XP_001654445.1caprin homolog                                                                                |
| AAEL0009E: protein pygopus                                                          | -0.0683374696560428  | 0.716475840781077   | 0.920811548445177 | NA                      | NA                  | KXJ69392.1 hypothei                                                  | XP_001657729.1protein pygopus isoform X1                                                                    |
| AAEL0182E: NA                                                                       | -0.0683243629960818  | 0.577550571798152   | 0.881961491587822 | NA                      | NA                  | NA                                                                   | XP_021709211.1microtubule-actin cross-linking factor 1, isoforms 1/2/3/5 isoform X20                        |
| AAEL0055E: succinate--CoA ligase [GDP-forming] subunit beta, mitochondrial          | -0.06832185642433005 | 0.557809885455011   | 0.877430182214874 | 00640 ; 00720 ; 00660 ; | aag01100 ; aag      | XP_001847263.1 suc                                                   | XP_001493288.2succinate--CoA ligase [GDP-forming] subunit beta, mitochondrial                               |
| AAEL0122E: uncharacterized LOC5576017                                               | -0.0683145621400096  | 0.6845528519215681  | 0.914629465876247 | NA                      | NA                  | XP_001847210.1 leu                                                   | XP_001653208.1leucine-rich repeat-containing protein 23                                                     |
| AAEL0043E: SWI/SNF-related matrix-associated actin-dependent regulator of chromatin | -0.0682482692450419  | 0.7609224615711362  | 0.936472047952049 | NA                      | NA                  | AGL76706.1 SWI/SNI                                                   | XP_021707148.1SWI/SNF-related matrix-associated actin-dependent regulator of chromatin subfamily B member 1 |
| AAEL0065E: protein turtle                                                           | -0.068207569592328   | 0.676885707500142   | 0.914438668403353 | NA                      | NA                  | XP_019532630.1 PRE                                                   | XP_021703968.1protein turtle isoform X1                                                                     |
| AAEL0060E: (E3-independent) E2 ubiquitin-conjugating enzyme UBE2O                   | -0.0680760094162042  | 0.762170734978676   | 0.937006693824152 | NA                      | aag04120            | KXJ69233.1 hypothei                                                  | XP_001657404.2[E3-independent] E2 ubiquitin-conjugating enzyme UBE2O                                        |
| AAEL0040E: protein stunted                                                          | -0.0677199491723621  | 0.600804785669161   | 0.892093596129407 | NA                      | aag01100 ; aag      | KXJ77977.1 hypothei                                                  | XP_001648383.1protein stunted                                                                               |
| AAEL0035E: 40S ribosomal protein S13                                                | -0.0675865541279183  | 0.653332062434207   | 0.907272485895905 | aag03010                | ETN60832.1 ribosom  | XP_001657049.140S                                                    | ribosomal protein S13                                                                                       |
| AAEL0205E: NA                                                                       | -0.0675390842899113  | 0.7016579           |                   |                         |                     |                                                                      |                                                                                                             |

|                                                                        |                      |                    |                   |                         |                     |                       |                                                                             |                     |
|------------------------------------------------------------------------|----------------------|--------------------|-------------------|-------------------------|---------------------|-----------------------|-----------------------------------------------------------------------------|---------------------|
| AAE0056f probable glutamate--tRNA ligase, mitochondrial                | -0.0655374204893683  | 0.746325371654886  | 0.931365937538534 | 00970 ; 00860           | aag01100 ; aag      | KXJ69212.1 hypothe    | XP_001651352.1probable glutamate--tRNA ligase, mitochondrial                |                     |
| AAE00084f AP-3 complex subunit delta                                   | -0.0654327602271749  | 0.671001230962183  | 0.912812708172959 | NA                      | aag04142            | KXJ73568.1 hypothe    | XP_001659245.1AP-3 complex subunit delta                                    |                     |
| AAE0187f NA                                                            | -0.0652776012525925  | 0.561349720147885  | 0.878642647525231 | NA                      | NA                  | NA                    | XP_019549463.1 serine/arginine repetitive matrix protein 1-like             |                     |
| AAE01377f trypsin 5G1-like                                             | -0.0652165822887397  | 0.593079212223371  | 0.888529762545765 | NA                      | aag04144            | NA                    | XP_021707950.1beta-arrestin-1 isoform X1                                    |                     |
| AAE0199f NA                                                            | -0.0652076194714393  | 0.657361584605218  | 0.909356780146906 | NA                      | NA                  | NA                    | XP_021708003.1 solute carrier family 26 member 10                           |                     |
| AAE0069f vacuolar protein sorting-associated protein 37A               | -0.065160983801886   | 0.807486577527882  | 0.948190794639012 | NA                      | aag04144            | KXJ69188.1 hypothe    | XP_001652330.2vacuolar protein sorting-associated protein 37A               |                     |
| AAE0235f NA                                                            | -0.06513011609611    | 0.786529032657094  | 0.944549897171207 | NA                      | NA                  | NA                    | XP_001651557.2activator of 90 kDa heat shock protein ATPase homolog 1       |                     |
| AAE0014f acylphosphatase-2                                             | -0.0650527994373573  | 0.678526902337049  | 0.914481546552978 | 00620 ; 00627           | aag01100 ; aag      | CRK94385.1 CLUMA_     | XP_019564776.1 acylphosphatase-2                                            |                     |
| AAE0005f regulator complex protein LAMTOR1                             | -0.065024797800721   | 0.684443879278359  | 0.914629465876247 | NA                      | aag04150            | ETN67883.1 hypothe    | XP_001647964.1regulator complex protein LAMTOR1                             |                     |
| AAE0089f serine/threonine-protein kinase RIO3                          | -0.064973391165727   | 0.640512677078859  | 0.904464102888003 | 04151 ; 05165 ; 04714 ; | NA                  | NA                    | XP_001660046.2serine/threonine-protein kinase RIO3                          |                     |
| AAE0004f uncharacterized LOC5577355                                    | -0.0649187316986894  | 0.574630755853509  | 0.881197098233729 | NA                      | NA                  | ETN58673.1 hypothe    | XP_001656432.1uncharacterized protein LOC5577355                            |                     |
| AAE0271f NA                                                            | -0.0648304736450219  | 0.738251697304595  | 0.928033958695205 | NA                      | aag03020            | NA                    | XP_021710745.1DNA-directed RNA polymerase III subunit RPC1                  |                     |
| AAE0084f mitochondrial import inner membrane translocase subunit TIM44 | -0.0647141968647798  | 0.68204731784092   | 0.914629465876247 | NA                      | NA                  | XP_001868783.1 mit    | XP_001653263.1mitochondrial import inner membrane translocase subunit TIM44 |                     |
| AAE0023f coiled-coil domain-containing protein 43                      | -0.0646305491570885  | 0.631891377908832  | 0.902506916959539 | NA                      | NA                  | ETN60628.1 NBP2 f     | XP_001655165.1coiled-coil domain-containing protein 43                      |                     |
| AAE0111f 39S ribosomal protein L38, mitochondrial                      | -0.0645216390167414  | 0.66573251843915   | 0.911964500946328 | NA                      | NA                  | KXJ80040.1 hypothe    | XP_001655173.139S ribosomal protein L38, mitochondrial                      |                     |
| AAE0202f NA                                                            | -0.0643980645682299  | 0.725696383662601  | 0.923177868750456 | NA                      | NA                  | NA                    | CRK89809.1CLUMA_                                                            | CG003479, isoform A |
| AAE0114f RNA polymerase-associated protein CTR9 homolog                | -0.0643886066781339  | 0.714780227958224  | 0.920089841424905 | NA                      | NA                  | KF835409.1 AGAP00     | XP_001655398.1RNA polymerase-associated protein CTR9 homolog                |                     |
| AAE0048f BTB/POZ domain-containing protein 10                          | -0.0641601830351666  | 0.705315033835084  | 0.917749125552377 | NA                      | NA                  | KXJ70013.1 hypothe    | XP_021697747.1BTB/POZ domain-containing protein 10 isoform X1               |                     |
| AAE0213f NA                                                            | -0.0641000190259125  | 0.564924866160423  | 0.880302387766415 | NA                      | NA                  | NA                    | XP_021697849.1nucleosome-remodeling factor subunit NURF301                  |                     |
| AAE0007f oligodendrocyte-myelin glycoprotein                           | -0.0640886949182112  | 0.844602859570324  | 0.963198678766584 | NA                      | NA                  | KXJ77298.1 hypothe    | XP_021705011.1oligodendrocyte-myelin glycoprotein                           |                     |
| AAE00076f F-box/WD repeat-containing protein 5                         | -0.0640660900955552  | 0.553211158940234  | 0.874531710113044 | NA                      | NA                  | NA                    | XP_021700478.1F-box/WD repeat-containing protein 5 isoform X3               |                     |
| AAE0136f zinc finger with UFM1-specific peptidase domain protein       | -0.0640356595954765  | 0.734893580417159  | 0.926618579210021 | NA                      | NA                  | NA                    | XP_021701539.1zinc finger with UFM1-specific peptidase domain protein       |                     |
| AAE0262f NA                                                            | -0.0640329258131352  | 0.851634188980164  | 0.964536838405106 | NA                      | NA                  | NA                    | XP_021710661.1neutralized-like protein 4                                    |                     |
| AAE0267f NA                                                            | -0.063850663856523   | 0.829649486244412  | 0.958094785081062 | NA                      | NA                  | NA                    | XP_021711287.1uncharacterized protein LOC110679832                          |                     |
| AAE0005f GTase Era, mitochondrial                                      | -0.0638432252187494  | 0.717750257908691  | 0.92129137591695  | NA                      | NA                  | KXJ83719.1 hypothe    | XP_001651093.2GTPase Era, mitochondrial                                     |                     |
| AAE0044f serine-rich adhesin for platelets                             | -0.0638223957342178  | 0.752972449192313  | 0.932927491234795 | NA                      | NA                  | XP_001849805.1 phc    | XP_019565607.1 probable tyrosine-protein phosphatase cdc-14 isoform X2      |                     |
| AAE0017f T-complex protein 1 subunit epsilon                           | -0.06380085194695576 | 0.572360119602948  | 0.880923047085115 | NA                      | NA                  | KXJ80468.1 hypothe    | XP_021703581.1T-complex protein 1 subunit epsilon                           |                     |
| AAE00072f putative fatty acyl-CoA reductase CG8306                     | -0.0637878752174086  | 0.720722470185439  | 0.921583569204186 | 73                      | aag04146            | CRK97583.1 CLUMA_     | XP_001652661.1putative fatty acyl-CoA reductase CG8306                      |                     |
| AAE0097f ethanolamine kinase                                           | -0.0637681349233446  | 0.677838510619544  | 0.914481546552978 | NA                      | aag01100 ; aag      | NA                    | XP_001660334.1ethanolamine kinase                                           |                     |
| AAE0020f mitochondrial-processing peptidase subunit alpha              | -0.0637470971005655  | 0.575050398699506  | 0.88120129372737  | NA                      | NA                  | ETN59954.1 mitocho    | XP_001654562.1mitochondrial-processing peptidase subunit alpha              |                     |
| AAE0105f tyrosine--tRNA ligase, mitochondrial                          | -0.0637162575991254  | 0.82527504291673   | 0.955377826472606 | 970                     | aag00970            | KXJ71001.1 hypothe    | XP_021703231.1tyrosine--tRNA ligase, mitochondrial                          |                     |
| AAE0001f uncharacterized LOC5568338                                    | -0.0636988799565626  | 0.5958088622609573 | 0.965722450478577 | NA                      | NA                  | XP_001865314.1 con    | XP_021710740.1uncharacterized protein LOC5568338                            |                     |
| AAE0243f NA                                                            | -0.063615131188028   | 0.717863590311378  | 0.921308334455412 | NA                      | NA                  | NA                    | XP_021699952.1F-actin-uncapping protein LRRRC16A isoform X7                 |                     |
| AAE0122f aminopeptidase N                                              | -0.063613728393554   | 0.682716886436415  | 0.914629465876247 | NA                      | aag01100 ; aag      | KF846929.1 AGAP00     | XP_001662326.1aminopeptidase N                                              |                     |
| AAE00079f eukaryotic translation initiation factor 3 subunit H         | -0.0635541426729236  | 0.628540807805168  | 0.901045385683245 | NA                      | aag03013            | XP_001846678.1 euk    | XP_001658759.1eukaryotic translation initiation factor 3 subunit H          |                     |
| AAE0180f NA                                                            | -0.0634854799984184  | 0.707148901343997  | 0.91797784850989  | NA                      | NA                  | NA                    | XP_021700941.1uncharacterized protein LOC5564837 isoform X1                 |                     |
| AAE0096f histone-lysine N-methyltransferase ash1                       | -0.0633161695469002  | 0.670636235767656  | 0.912812708172959 | 310                     | aag01100 ; aag      | NA                    | XP_021707226.1histone-lysine N-methyltransferase ash1 isoform X1            |                     |
| AAE00013f palmitoyltransferase app                                     | -0.0632766622295307  | 0.593544061053639  | 0.888529762455765 | NA                      | aag04391            | XP_003435719.1 AG_    | XP_021699465.1palmitoyltransferase app isoform X1                           |                     |
| AAE0125f NADH-ubiquinone oxidoreductase 75 kDa subunit, mitochondrial  | -0.063036555696185   | 0.633165080219456  | 0.902506916959539 | NA                      | aag01100 ; aag      | KXJ75707.1 hypothe    | XP_001662693.2NADH-ubiquinone oxidoreductase 75 kDa subunit, mitochondrial  |                     |
| AAE0211f NA                                                            | -0.0629461722800915  | 0.588172799933442  | 0.886401261871374 | NA                      | NA                  | ABF18368.1reverse     | transcriptase-like protein                                                  |                     |
| AAE0122f uncharacterized LOC5576016                                    | -0.0629430673083846  | 0.71927333843484   | 0.921583569204186 | NA                      | NA                  | KXJ77458.1 hypothe    | XP_021705482.1uncharacterized protein LOC5576016                            |                     |
| AAE0025f zinc finger C2HC domain-containing protein 1C                 | -0.062925909491353   | 0.710354598756664  | 0.918935795219545 | NA                      | NA                  | XP_021713403.1zinc    | finger C2HC domain-containing protein 1C isoform X3                         |                     |
| AAE0115f 60S ribosomal protein L27                                     | -0.0628157895460428  | 0.63640833756796   | 0.902624772241117 | aag03010                | ACF72873.1 60S ribo | XP_001661768.160S     | ribosomal protein L27                                                       |                     |
| AAE00021f NFU1 iron-sulfur cluster scaffold homolog, mitochondrial     | -0.0627954606416731  | 0.639753123334049  | 0.904449291387452 | NA                      | KF841827.1 AGAP00   | XP_001654807.1NFU1    | iron-sulfur cluster scaffold homolog, mitochondrial                         |                     |
| AAE00073f protein held out wings                                       | -0.0627729379981419  | 0.593275715988017  | 0.888529762455765 | NA                      | NA                  | XP_019539292.1 PRE    | XP_021701852.1protein held out wings                                        |                     |
| AAE0117f general odorant-binding protein 99a                           | -0.0626730560497315  | 0.737612978523075  | 0.927599209713406 | NA                      | KXJ77350.1 hypothe  | XP_001661864.2general | odorant-binding protein 99a                                                 |                     |
| AAE0012f zinc finger protein 706                                       | -0.0626719515075324  | 0.594292004769208  | 0.888690215018581 | NA                      | NA                  | XP_001843968.1 con    | XP_001652874.1zinc finger protein 706                                       |                     |
| AAE0045f uncharacterized LOC5564978                                    | -0.0626615487399033  | 0.579467167291664  | 0.882283691803025 | NA                      | NA                  | ETN62478.1 hypothe    | KF839321.1AGAP009181-like protein                                           |                     |
| AAE00014f post-GPI attachment to proteins factor 2-like                | -0.0626381709546678  | 0.734504657303778  | 0.926618579210021 | NA                      | NA                  | KXJ72134.1 hypothe    | XP_021694950.1post-GPI attachment to proteins factor 2-like isoform X1      |                     |
| AAE00059f transmembrane protein 131 homolog                            | -0.0625184629245453  | 0.623084959600169  | 0.898271200863489 | NA                      | NA                  | KXJ70860.1 hypothe    | XP_001651750.1transmembrane protein 131 homolog                             |                     |
| AAE00051f tetraspanin-11                                               | -0.0624107803456447  | 0.749189432005519  | 0.932554085844433 | NA                      | NA                  | KXJ72547.1 hypothe    | XP_019540209.1 tetraspanin-11-like                                          |                     |
| AAE0123f protein preli-like                                            | -0.0624087352668246  | 0.688415540807741  | 0.916010156153545 | NA                      | NA                  | KXJ80311.1 hypothe    | XP_001662433.1protein preli-like                                            |                     |
| AAE00062f ras-related protein Rab-3                                    | -0.0623736420129734  | 0.664930109302135  | 0.911808086169482 | NA                      | NA                  | XP_001853751.1 GTF    | XP_001651875.1ras-related protein Rab-3 isoform X2                          |                     |
| AAE00097f NA                                                           | -0.06234020598376666 | 0.784190205279345  | 0.944372632355572 | NA                      | NA                  | NA                    | XP_001660343.2inner centromere protein                                      |                     |
| AAE00059f probable fatty acid-binding protein                          | -0.0623208215225503  | 0.5856871264466    | 0.885239904594145 | NA                      | NA                  | KF848504.1 AGAP01     | XP_001657349.1probable fatty acid-binding protein                           |                     |
| AAE0111f U4/U6.U5 small nuclear ribonucleoprotein 27 kDa protein       | -0.0623162489804844  | 0.656528666546455  | 0.909161665386398 | NA                      | aag03040            | ETN63138.1 U4/U6.L    | XP_001661409.1U4/U6.U5 small nuclear ribonucleoprotein 27 kDa protein       |                     |
| AAE0123f calmodulin                                                    | -0.0622774567012364  | 0.588112495298394  | 0.886401261871374 | aag04070 ; aag          | ACT88125.1 AT1514:  | APA33948.1se          | menial fluid protein                                                        |                     |
| AAE0112f uridine-cytidine kinase-like 1                                | -0.0622600145081022  | 0.587016981968079  | 0.885965272768618 | 00983 ; 00240           | aag01100 ; aag      | KXJ75                 |                                                                             |                     |

|                                                                                |                      |                   |                   |                     |                    |                                                                            |                                                                                               |
|--------------------------------------------------------------------------------|----------------------|-------------------|-------------------|---------------------|--------------------|----------------------------------------------------------------------------|-----------------------------------------------------------------------------------------------|
| AAEL0035f protein eva-1                                                        | -0.0606234002968327  | 0.861029491047879 | 0.96610329632302  | NA                  | NA                 | KXJ72111.1 hypothei                                                        | XP_021704510.1protein eva-1                                                                   |
| AAEL0194f NA                                                                   | -0.0603263061948967  | 0.705583477684822 | 0.917749125552377 | NA                  | aag03040; aag NA   | XP_021707697.1heat shock 70 kDa protein cognate 4                          |                                                                                               |
| AAEL0091f mitochondrial 2-oxodicarboxylate carrier                             | -0.0602460252611716  | 0.801025300047723 | 0.946215055875588 | NA                  | ETN63783.1 mitocho | XP_001659718.2mitochondrial 2-oxodicarboxylate carrier                     |                                                                                               |
| AAEL0209f NA                                                                   | -0.0601769415791572  | 0.845819491207711 | 0.963198678766584 | NA                  | NA                 | NA                                                                         |                                                                                               |
| AAEL0068f DCN1-like protein 4                                                  | -0.0601498584062276  | 0.57174873857644  | 0.880923047085115 | NA                  | NA                 | ETN60321.1 hypothei                                                        | XP_001652247.1DCN1-like protein 4 isoform X1                                                  |
| AAEL0102x rRNA 2'-O-methyltransferase fibrillarin                              | -0.0601073648107099  | 0.636005371147356 | 0.902538767814767 | NA                  | aag03008           | NA                                                                         | XP_001654398.2rRNA 2'-O-methyltransferase fibrillarin                                         |
| AAEL0047f sorting nexin-13                                                     | -0.0600600403157563  | 0.749438991167275 | 0.932554085844433 | NA                  | XP_019532839.1 PRÉ | XP_001649816.2sorting nexin-13 isoform X1                                  |                                                                                               |
| AAEL0039f uncharacterized LOC5563773                                           | -0.0600225337512995  | 0.626062290232175 | 0.899738434283378 | NA                  | NA                 | KXJ74511.1 hypothei                                                        | ABF18510.1putative 16.8 kDa salivary secreted protein                                         |
| AAEL0008f dipeptidase 1                                                        | -0.0600014466952197  | 0.660381599840346 | 0.909580313002131 | NA                  | NA                 | KF837703.1 AGAP01                                                          | XP_001651295.1dipeptidase 1                                                                   |
| AAEL0048f ADP,ATP carrier protein 1                                            | -0.0598826333248457  | 0.670630991186661 | 0.912812708172959 | NA                  | NA                 | Q27238.2 RecName:                                                          | XP_001649911.1ADP,ATP carrier protein 1                                                       |
| AAEL0111f protein phosphatase 1 regulatory subunit 3A                          | -0.0597752331380931  | 0.600695482823026 | 0.892093596129407 | NA                  | NA                 | KXJ69696.1 hypothei                                                        | XP_001661490.1protein phosphatase 1 regulatory subunit 3A                                     |
| AAEL0067f 2-oxoglutarate dehydrogenase, mitochondrial                          | -0.0597260206224329  | 0.665522523442588 | 0.911964500946328 | 00020; 00310; 00380 | aag01100; aag      | XP_019557672.1 PRÉ                                                         | XP_001652168.12-oxoglutarate dehydrogenase, mitochondrial isoform X6                          |
| AAEL0141f uncharacterized LOC5563841                                           | -0.059702360900813   | 0.716226953251301 | 0.920748871726526 | NA                  | NA                 | NA                                                                         | XP_001648157.1uncharacterized protein LOC5563841                                              |
| AAEL0141f abl interactor 2                                                     | -0.0596231310710729  | 0.707227701162684 | 0.91797784850989  | NA                  | NA                 | NA                                                                         | XP_001648084.1abl interactor 2                                                                |
| AAEL0150f 60S ribosomal protein L23                                            | -0.059586986982586   | 0.734722782610679 | 0.926618579210021 | NA                  | aag03010           | NA                                                                         | XP_001663765.160S ribosomal protein L23                                                       |
| AAEL0031f NA                                                                   | -0.0594893797459643  | 0.845028682020944 | 0.963198678766584 | NA                  | NA                 | KXJ80175.1 hypothei                                                        | XP_001656347.1brestrophin-4 isoform X2                                                        |
| AAEL0146f uncharacterized LOC5565020                                           | -0.0594673991656438  | 0.702158914337773 | 0.916881840462067 | NA                  | NA                 | NA                                                                         | XP_001649360.1uncharacterized protein LOC5565020                                              |
| AAEL0077f ubiquitin thioesterase otubain-like                                  | -0.0594401183811341  | 0.677963459084569 | 0.914481546552978 | NA                  | NA                 | KF839861.1 AGAP00                                                          | XP_021704011.1ubiquitin thioesterase otubain-like                                             |
| AAEL0121f small subunit processome component 20 homolog                        | -0.0594196461005803  | 0.680764456540641 | 0.914629465876247 | NA                  | NA                 | XP_001850659.1 con                                                         | XP_021700127.1small subunit processome component 20 homolog                                   |
| AAEL0120f oxysterol-binding protein-related protein 2                          | -0.05934622205830021 | 0.694340894088375 | 0.916122517126697 | NA                  | NA                 | XP_019536421.1 PRÉ                                                         | XP_001655845.2oxysterol-binding protein-related protein 2 isoform X2                          |
| AAEL0129f leucine-rich repeat-containing protein let-4                         | -0.0592949040302501  | 0.659160882179252 | 0.909580313002131 | NA                  | NA                 | XP_001663048.2leucine-rich repeat-containing protein let-4 isoform X1      |                                                                                               |
| AAEL0054f equilibrative nucleoside transporter 1                               | -0.0592051165780444  | 0.636311485767259 | 0.902624727241117 | NA                  | NA                 | XP_001847898.1 eql                                                         | XP_021693095.1equilibrative nucleoside transporter 1                                          |
| AAEL0071f m-AAA protease-interacting protein 1, mitochondrial                  | -0.0590581956463461  | 0.671385978164688 | 0.912812708172959 | NA                  | NA                 | KXJ73528.1 hypothei                                                        | XP_001658212.1m-AAA protease-interacting protein 1, mitochondrial                             |
| AAEL0122f mitochondrial import inner membrane translocase subunit Tim16        | -0.0590065176266536  | 0.695762401772563 | 0.916122517126697 | NA                  | NA                 | KXJ80926.1 hypothei                                                        | XP_001662322.1mitochondrial import inner membrane translocase subunit Tim16                   |
| AAEL0147f alpha-aminoadipic semialdehyde synthase, mitochondrial               | -0.0589923856889205  | 0.634420827235799 | 0.902506916959539 | NA                  | aag01100; aag NA   | XP_001649464.1alpha-aminoadipic semialdehyde synthase, mitochondrial       |                                                                                               |
| AAEL0088f probable oligoribonuclease                                           | -0.0589256600548397  | 0.80376587140849  | 0.94649029363412  | NA                  | aag03008           | XP_019535121.1 PRÉ                                                         | XP_001653489.2oligoribonuclease isoform X1                                                    |
| AAEL0003f inositol monophosphatase 1                                           | -0.05880734383478275 | 0.650860177538788 | 0.906932039402093 | 04070; 00562; 00521 | aag01100; aag      | KXJ70076.1 hypothei                                                        | XP_021697915.1inositol monophosphatase 1                                                      |
| AAEL0078f la-related protein 7                                                 | -0.0588212657930306  | 0.855011909012973 | 0.964890728557884 | NA                  | NA                 | KXJ68225.1 hypothei                                                        | XP_001658707.2la-related protein 7                                                            |
| AAEL0183f NA                                                                   | -0.0587418009422444  | 0.732703378433106 | 0.925763626025187 | NA                  | NA                 | NA                                                                         | XP_021701119.1tyrosine-protein kinase receptor torso isoform X1                               |
| AAEL0120f putative glutathione-specific gamma-glutamylcyclotransferase 2       | -0.0587468969885842  | 0.609141995047286 | 0.893547770777888 | NA                  | 480 aag01100; aag  | ETN67555.1 hypothei                                                        | XP_001662226.1putative glutathione-specific gamma-glutamylcyclotransferase 2                  |
| AAEL0101f DNA methyltransferase 1-associated protein 1                         | -0.0587454510755564  | 0.806188602445615 | 0.947693857908092 | NA                  | NA                 | NA                                                                         | XP_001654230.1DNA methyltransferase 1-associated protein 1                                    |
| AAEL0034f spondin-1                                                            | -0.0584739393810546  | 0.596500197501677 | 0.889585230151692 | NA                  | NA                 | KXJ81428.1 hypothei                                                        | XP_019527642.1 spondin-1-like                                                                 |
| AAEL0219f NA                                                                   | -0.0583225597661303  | 0.889866022831807 | 0.972006599130629 | NA                  | NA                 | NA                                                                         | ---NA---                                                                                      |
| AAEL0004f probable isocitrate dehydrogenase [NAD] subunit alpha, mitochondrial | -0.0583121408326042  | 0.688797164836813 | 0.916010156153545 | NA                  | aag01100; aag      | XP_001656451.2 pro                                                         | XP_001656451.2probable isocitrate dehydrogenase [NAD] subunit alpha, mitochondrial isoform X1 |
| AAEL0122f SCY1-like protein 2                                                  | -0.0582894575739221  | 0.799019847558596 | 0.946215055875588 | NA                  | NA                 | KXJ70968.1 hypothei                                                        | XP_001662347.2SCY1-like protein 2                                                             |
| AAEL0041f bone morphogenetic protein receptor type-2                           | -0.0582025633105839  | 0.837316805994915 | 0.96281659643463  | NA                  | aag04350           | KXJ73300.1 hypothei                                                        | XP_021698350.1bone morphogenetic protein receptor type-2                                      |
| AAEL0018f protein-lysine N-methyltransferase CG9154                            | -0.0581316031831025  | 0.781318184646491 | 0.943962424451135 | NA                  | NA                 | KXJ70368.1 hypothei                                                        | XP_001654135.1protein-lysine N-methyltransferase CG9154                                       |
| AAEL0058f membrane alanyl aminopeptidase                                       | -0.0581025488624667  | 0.670127563414384 | 0.912812708172959 | NA                  | NA                 | XP_019561868.1 PRÉ                                                         | XP_021712899.1membrane alanyl aminopeptidase                                                  |
| AAEL0137f homeobox protein vnd                                                 | -0.0580075235576397  | 0.758690170025369 | 0.935439571457873 | NA                  | NA                 | NA                                                                         | XP_001663964.2homeobox protein vnd isoform X1                                                 |
| AAEL0040f uncharacterized LOC5564033                                           | -0.0579726197140483  | 0.652989004571224 | 0.907272485895905 | NA                  | NA                 | KXJ77145.1 hypothei                                                        | XP_001648388.2uncharacterized protein LOC5564033                                              |
| AAEL0070f peroxisomal multifunctional enzyme type 2                            | -0.0579665696343053  | 0.614863460768835 | 0.896845306410123 | NA                  | aag01100; aag      | KXJ80570.1 hypothei                                                        | XP_001652466.1peroxisomal multifunctional enzyme type 2 isoform X1                            |
| AAEL0025f protein yippee                                                       | -0.0576816991125682  | 0.698658239549934 | 0.916600697023218 | NA                  | NA                 | ETN59009.1 yippee f                                                        | XP_001655467.1protein yippee                                                                  |
| AAEL0062f methyltransferase-like protein 14 homolog                            | -0.0575866573144565  | 0.800138682425156 | 0.946215055875588 | NA                  | NA                 | KF849453.1 AGAP00                                                          | XP_021702143.1methyltransferase-like protein 14 homolog                                       |
| AAEL0126f NAD(P) transhydrogenase, mitochondrial                               | -0.0574369625229683  | 0.61662977293764  | 0.897164966965308 | 00250; 00430        | aag01100; aag      | KXJ72786.1 hypothei                                                        | XP_001662741.2NAD(P) transhydrogenase, mitochondrial                                          |
| AAEL0035f arf-GAP domain and FG repeat-containing protein 1                    | -0.0574081683873804  | 0.591707056978348 | 0.888387896109256 | NA                  | XP_019536557.1 PRÉ | XP_021700519.1arf-GAP domain and FG repeat-containing protein 1 isoform X4 |                                                                                               |
| AAEL0043f protein lunapark-B                                                   | -0.05740701478238    | 0.675867107250782 | 0.914438668430353 | NA                  | NA                 | KXJ62518.1 hypothei                                                        | XP_001648847.1protein lunapark-B                                                              |
| AAEL0043f eukaryotic translation initiation factor 3 subunit M                 | -0.0573661471793347  | 0.61114974993317  | 0.894646314231935 | NA                  | NA                 | KF849817.1 AGAP01                                                          | XP_001648944.1eukaryotic translation initiation factor 3 subunit M                            |
| AAEL0199f NA                                                                   | -0.0572640539902484  | 0.804453900427897 | 0.946758462778864 | NA                  | NA                 | XP_021698790.1potassium voltage-gated channel protein Shab isoform X3      |                                                                                               |
| AAEL0099f probable small nuclear ribonucleoprotein Sm D2                       | -0.0571947192105536  | 0.7259338817208   | 0.923177868750456 | NA                  | aag03040           | NA                                                                         | XP_001654090.1probable small nuclear ribonucleoprotein Sm D2                                  |
| AAEL0126f RNA-binding protein 34                                               | -0.0571570053025814  | 0.671577727829479 | 0.912812708172959 | NA                  | NA                 | KXJ72783.1 hypothei                                                        | XP_001662743.2RNA-binding protein 34                                                          |
| AAEL0236f NA                                                                   | -0.0571285110559272  | 0.87589020619925  | 0.969652664055335 | NA                  | NA                 | NA                                                                         | NA                                                                                            |
| AAEL0069f peritrophin-1-like                                                   | -0.0570352622598183  | 0.700744791408314 | 0.916629842641068 | NA                  | NA                 | KXJ79641.1 hypothei                                                        | XP_019533670.1 probable chitinase 3                                                           |
| AAEL0111f actin-5C                                                             | -0.0570016261        |                   |                   |                     |                    |                                                                            |                                                                                               |



|                                                                       |                      |                   |                   |               |                                                                                                              |                                                                                                 |                                                               |
|-----------------------------------------------------------------------|----------------------|-------------------|-------------------|---------------|--------------------------------------------------------------------------------------------------------------|-------------------------------------------------------------------------------------------------|---------------------------------------------------------------|
| AAEL01387 oxidoreductase-like domain-containing protein 1             | -0.0500408961091006  | 0.755588737744886 | 0.934127170333935 | NA            | NA                                                                                                           | NA                                                                                              | XP_001657184.1oxidoreductase-like domain-containing protein 1 |
| AAEL00975 NA                                                          | -0.0499433366593772  | 0.695349602871681 | 0.916122517126697 | NA            | aag04013 ; aag NA                                                                                            | XP_001660306.2ras-related protein Rac1                                                          |                                                               |
| AAEL01401 probable cytochrome P450 4ac1                               | -0.0499319685491121  | 0.779958457972283 | 0.943566949556407 | NA            | NA                                                                                                           | NA                                                                                              | XP_001664239.2probable cytochrome P450 4ac1 isoform X2        |
| AAEL00851 sphingosine kinase 2                                        | -0.0498678996898953  | 0.794148399419278 | 0.945793949302124 | NA            | aag01100 ; aag ETN59614.1 hect E3 ;                                                                          | XP_021697372.1sphingosine kinase 2                                                              |                                                               |
| AAEL00643 lon protease homolog, mitochondrial                         | -0.0498673137873035  | 0.70806840059767  | 0.91797784850989  | NA            | NA                                                                                                           | XP_019527474.1 PRÉ XP_001657828.1lon protease homolog, mitochondrial isoform X2                 |                                                               |
| AAEL00015 phytanoyl-CoA dioxygenase domain-containing protein 1       | -0.0498537030341156  | 0.66987427847813  | 0.912812708172959 | NA            | NA                                                                                                           | KXJ69214.1 hypotheI XP_001657669.2 phytanoyl-CoA dioxygenase domain-containing protein 1        |                                                               |
| AAEL00545 carnitine O-palmitoyltransferase 1, liver isoform           | -0.0497735193499521  | 0.665385507441679 | 0.911964500946328 | 71            | aag01212 ; aag XP_019538632.1 PRÉ XP_001650914.1carnitine O-palmitoyltransferase 1, liver isoform isoform X1 |                                                                                                 |                                                               |
| AAEL00165 proton-coupled folate transporter                           | -0.0497612122013419  | 0.80382760755821  | 0.94649029363412  | NA            | NA                                                                                                           | KXJ83554.1 hypotheI XP_001659953.1proton-coupled folate transporter                             |                                                               |
| AAEL00625 uncharacterized LOC5567603                                  | -0.0497395098608706  | 0.709187918010034 | 0.918371407476546 | NA            | NA                                                                                                           | XP_001657581.2uncharacterized protein LOC5567603                                                |                                                               |
| AAEL00804 probable ATP-dependent RNA helicase DHX34                   | -0.049738622383451   | 0.812306107309991 | 0.95026814053517  | NA            | NA                                                                                                           | KXJ80602.1 hypotheI XP_021710191.1GPI mannosyltransferase 2 isoform X3                          |                                                               |
| AAEL01141 dynein light chain 1, cytoplasmic                           | -0.0496674633176123  | 0.639741106934966 | 0.904449291387452 | NA            | NA                                                                                                           | XP_015836539.1 PRÉ XP_021709064.1dynein light chain 1, cytoplasmic isoform X1                   |                                                               |
| AAEL02002 NA                                                          | -0.0496052960155485  | 0.77175302976672  | 0.941147080452193 | NA            | NA                                                                                                           | XP_019541668.1 bestrophin-2                                                                     |                                                               |
| AAEL01375 basic-leucine zipper transcription factor A                 | -0.0494445037403733  | 0.885536051042854 | 0.970789723835142 | NA            | NA                                                                                                           | XP_021697271.1basic-leucine zipper transcription factor A isoform X1                            |                                                               |
| AAEL00985 proton-associated sugar transporter A                       | -0.0493988711266732  | 0.707859759815701 | 0.91797784850989  | NA            | NA                                                                                                           | KXJ71193.1 hypotheI XP_001661720.2proton-associated sugar transporter A isoform X2              |                                                               |
| AAEL00615 putative sodium-dependent multivitamin transporter          | -0.0493809362218584  | 0.67046064139454  | 0.912812708172959 | NA            | NA                                                                                                           | KXJ70994.1 hypotheI XP_021710706.1putative sodium-dependent multivitamin transporter            |                                                               |
| AAEL00985 proteasome subunit alpha type-6                             | -0.0493378471420465  | 0.719920378132278 | 0.921583569204186 | NA            | aag03050 NA                                                                                                  | XP_001654091.1proteasome subunit alpha type-6                                                   |                                                               |
| AAEL01205 DET1- and DDB1-associated protein 1                         | -0.049282450739212   | 0.680886859514328 | 0.914629465876247 | NA            | NA                                                                                                           | ETN61349.1 DET1- aI XP_001662161.1DET1- and DDB1-associated protein 1                           |                                                               |
| AAEL00355 FGFR1 oncogene partner 2 homolog                            | -0.0492776969867177  | 0.794965553211062 | 0.945793949302124 | NA            | NA                                                                                                           | KXJ82565.1 hypotheI XP_001656904.2FGFR1 oncogene partner 2 homolog                              |                                                               |
| AAEL02147 NA                                                          | -0.0490990883690177  | 0.793113352100786 | 0.945793949302124 | 04070 ; 00562 | aag01100 ; aag NA                                                                                            | XP_021694312.1type I inositol 3,4-bisphosphate 4-phosphatase isoform X2                         |                                                               |
| AAEL01285 periodic tryptophan protein 1 homolog                       | -0.0490666471946888  | 0.670890512925    | 0.912812708172959 | NA            | NA                                                                                                           | XP_001663005.2periodic tryptophan protein 1 homolog                                             |                                                               |
| AAEL00325 inhibitor of nuclear factor kappa-B kinase subunit beta2    | -0.0490588770780123  | 0.785337178335698 | 0.94437263255572  | NA            | aag04150 ; aag KXJ72408.1 hypotheI XP_001656614.2inhibitor of nuclear factor kappa-B kinase subunit beta2    |                                                                                                 |                                                               |
| AAEL01251 translation initiation factor elf-2B subunit delta          | -0.0490538612543936  | 0.734903455385899 | 0.926618579210021 | 270           | aag03013 KXJ74494.1 hypotheI XP_001656114.1translation initiation factor elf-2B subunit delta isoform X1     |                                                                                                 |                                                               |
| AAEL00465 actin-87E                                                   | -0.0489434898905438  | 0.727362024286553 | 0.923566968708516 | NA            | aag04145 ; aag AD848797.2 beta-actI XP_019563902.1 actin-87E-like                                            |                                                                                                 |                                                               |
| AAEL00741 protein FAM136A                                             | -0.0489294774046204  | 0.851510497549979 | 0.964536838405106 | NA            | NA                                                                                                           | XP_001861591.1 con XP_001658315.2protein FAM136A                                                |                                                               |
| AAEL00465 sorting nexin-12                                            | -0.0487622871063343  | 0.657177838173819 | 0.909239282344833 | NA            | aag04144 XP_001843163.1 sorI XP_021694009.1sorting nexin-12                                                  |                                                                                                 |                                                               |
| AAEL00545 uncharacterized LOC5566480                                  | -0.048642319616401   | 0.701600954192158 | 0.916878235043446 | NA            | NA                                                                                                           | KXJ68082.1 hypotheI XP_019560733.1 transmembrane and ubiquitin-like domain-containing protein 1 |                                                               |
| AAEL01395 RNA-binding protein lark                                    | -0.0484565370884256  | 0.716837758471195 | 0.92101941549866  | NA            | NA                                                                                                           | XP_001657237.1RNA-binding protein lark                                                          |                                                               |
| AAEL01987 NA                                                          | -0.0484416386966991  | 0.836447128219431 | 0.9615223577608   | NA            | aag03013 ; aag NA                                                                                            | XP_021695645.1ribonuclease P protein subunit p25-like protein                                   |                                                               |
| AAEL01505 protein SGT1 homolog                                        | -0.04829793155541783 | 0.727184399710458 | 0.923566968708516 | NA            | NA                                                                                                           | XP_001650442.1protein SGT1 homolog                                                              |                                                               |
| AAEL00365 protein homolog                                             | -0.0482316092672892  | 0.696471347942411 | 0.916122517126697 | NA            | NA                                                                                                           | KXJ84170.1 hypotheI XP_001657165.1la protein homolog                                            |                                                               |
| AAEL01255 sialin                                                      | -0.0481894197837797  | 0.841719160849444 | 0.963198678766584 | NA            | NA                                                                                                           | KXJ7387.1 hypotheI XP_019535572.1 sialin-like                                                   |                                                               |
| AAEL00455 protein rhomboid                                            | -0.0480450938100424  | 0.844339465833454 | 0.963198678766584 | NA            | NA                                                                                                           | KXJ83153.1 hypotheI XP_021703763.1protein rhomboid                                              |                                                               |
| AAEL00171 ATP-dependent RNA helicase DHX36                            | -0.0479458810635587  | 0.821494175093107 | 0.954280102887015 | NA            | aag03018 KXJ77478.1 hypotheI XP_001653827.1ATP-dependent RNA helicase DHX36                                  |                                                                                                 |                                                               |
| AAEL01387 CD63 antigen                                                | -0.047902168869284   | 0.790961964476892 | 0.945793949302124 | NA            | NA                                                                                                           | XP_021697876.1CD63 antigen isoform X1                                                           |                                                               |
| AAEL00705 NADH dehydrogenase [ubiquinone] 1 beta subcomplex subunit 3 | -0.0478909382916112  | 0.723679067518651 | 0.922102780092934 | NA            | aag01100 ; aag KFB49975.1 hypotheI XP_001652532.1NADH dehydrogenase [ubiquinone] 1 beta subcomplex subunit 3 |                                                                                                 |                                                               |
| AAEL01007 NA                                                          | -0.0478597440201218  | 0.875232602881778 | 0.969652664055335 | NA            | NA                                                                                                           | XP_001660617.1guanine nucleotide-binding protein subunit beta-5                                 |                                                               |
| AAEL01155 probable protein phosphatase 2C T23F11.1                    | -0.0478315974673322  | 0.697194362386309 | 0.916312126946326 | 04660 ; 04658 | NA                                                                                                           | KFB46822.1 hypotheI XP_001661751.1probable protein phosphatase 2C T23F11.1                      |                                                               |
| AAEL00571 protein mini spindles                                       | -0.0478277449421815  | 0.672615957593929 | 0.912968243848131 | NA            | NA                                                                                                           | XP_019541161.1 PRÉ XP_021706616.1protein mini spindles isoform X1                               |                                                               |
| AAEL01035 ATP-binding cassette sub-family F member 3                  | -0.0476071121900058  | 0.693245786425914 | 0.916122517126697 | NA            | NA                                                                                                           | XP_001654470.1ATP-binding cassette sub-family F member 3                                        |                                                               |
| AAEL01355 zinc finger Y-chromosomal protein 1                         | -0.0475951356300775  | 0.884273388067889 | 0.970521528629931 | NA            | NA                                                                                                           | XP_001663744.2zinc finger Y-chromosomal protein 1                                               |                                                               |
| AAEL02375 NA                                                          | -0.0474167860712057  | 0.798345566224348 | 0.946215055875588 | NA            | NA                                                                                                           | XP_021695288.1A disintegrin and metalloproteinase with thrombospondin motifs 7                  |                                                               |
| AAEL00875 protein DGCR14 homolog                                      | -0.0473549875042369  | 0.887698728353736 | 0.970996238637524 | NA            | NA                                                                                                           | KXJ74176.1 hypotheI XP_001659529.1protein DGCR14 homolog                                        |                                                               |
| AAEL00115 sodium-coupled monocarboxylate transporter 1                | -0.0472156234519093  | 0.724463929869066 | 0.92257363446653  | NA            | NA                                                                                                           | XP_001658302.1sodium-coupled monocarboxylate transporter 1                                      |                                                               |
| AAEL02335 NA                                                          | -0.0472063775149775  | 0.771127801530219 | 0.941147080452193 | NA            | NA                                                                                                           | XP_021694111.1neurochondrin homolog                                                             |                                                               |
| AAEL01945 NA                                                          | -0.0470979225005565  | 0.695232147563543 | 0.916122517126697 | 04660 ; 04658 | aag04310 NA                                                                                                  | XP_021707007.1serine/threonine-protein phosphatase 2B catalytic subunit 3                       |                                                               |
| AAEL02325 NA                                                          | -0.0470378155375961  | 0.860099318236069 | 0.965788154534265 | NA            | NA                                                                                                           | XP_021695341.1 neural-cadherin-like                                                             |                                                               |
| AAEL01205 uncharacterized LOC5575748                                  | -0.0468364067408134  | 0.782683731860425 | 0.94396424451135  | NA            | NA                                                                                                           | XP_021703199.1uncharacterized protein LOC5575748 isoform X1                                     |                                                               |
| AAEL01421 sister chromatid cohesion protein PD55 homolog B-B          | -0.046782609182752   | 0.712890970495835 | 0.919252089784076 | NA            | NA                                                                                                           | XP_001648205.1sister chromatid cohesion protein PD55 homolog B-B                                |                                                               |
| AAEL01954 NA                                                          | -0.0467573861354844  | 0.82220490194773  | 0.954452060294489 | NA            | NA                                                                                                           | XP_021703304.1voltage-dependent L-type calcium channel subunit beta-1 isoform X2                |                                                               |
| AAEL01435 26S proteasome non-ATPase regulatory subunit 12             | -0.0467442058861535  | 0.706077612057807 | 0.91774912552377  | NA            | aag03050 NA                                                                                                  | XP_001648476.126S proteasome non-ATPase regulatory subunit 12                                   |                                                               |
| AAEL00911 zinc finger FYVE domain-containing protein 9                | -0.0465957374396919  | 0.723893771287911 | 0.922102780092934 | NA            | aag04144 ; aag KXJ76108.1 hypotheI XP_021692970.1zinc finger FYVE domain-containing protein 9                |                                                                                                 |                                                               |
| AAEL02005 NA                                                          | -0.046554507345094   | 0.878768096615666 | 0.969652664055335 | NA            | NA                                                                                                           | XP_021703321.1ras-interacting protein RIP3 isoform X2                                           |                                                               |
| AAEL01505 spectrin alpha chain                                        | -0.0464824177183324  | 0.683705612261746 | 0.914629465876247 | NA            | NA                                                                                                           | XP_001650465.1spectrin alpha chain isoform X4                                                   |                                                               |
| AAEL01405 metal transporter CNM4                                      | -0.0464593848661307  | 0.750941918180588 | 0.932554085844433 | NA            | NA                                                                                                           | XP_001664301.1metal transporter CNM4                                                            |                                                               |
| AAEL01035 serine/arginine-rich splicing factor 2                      | -0.0464449102907829  | 0.671906505842178 | 0.912813925547137 | NA            | aag03040 NA                                                                                                  | XP_001654458.1serine/arginine-rich splicing factor 2                                            |                                                               |

|                                                                   |                      |                   |                   |               |                |                                                                                    |                                                                                    |
|-------------------------------------------------------------------|----------------------|-------------------|-------------------|---------------|----------------|------------------------------------------------------------------------------------|------------------------------------------------------------------------------------|
| AAEL0197f NA                                                      | -0.0444444972042446  | 0.838630334275114 | 0.962348963212321 | NA            | NA             | NA                                                                                 | XP_021700441.1uncharacterized protein LOC5571949 isoform X1                        |
| AAEL0055i uncharacterized LOC5579827                              | -0.044390049005268   | 0.8463013483636   | 0.963198678766584 | NA            | NA             | KXJ72329.1 hypothei                                                                | XP_001651058.1uncharacterized protein LOC5579827                                   |
| AAEL0004c calcyphosin-like protein                                | -0.044360026172501   | 0.763681775445787 | 0.937987145975992 | NA            | NA             | XP_019538032.1 PRE                                                                 | XP_001659255.1calcyphosin-like protein isoform X2                                  |
| AAEL0000i serine protease easter                                  | -0.0444069391881042  | 0.716332467241982 | 0.920755882603816 | NA            | NA             | KXJ72917.1 hypothei                                                                | XP_001647872.2serine protease easter                                               |
| AAEL0052i cyclin-dependent kinases regulatory subunit             | -0.044372743375411   | 0.891017547146519 | 0.972336404299425 | NA            | NA             | KXJ83642.1 hypothei                                                                | XP_001650539.1cyclin-dependent kinases regulatory subunit                          |
| AAEL0132i proteasome subunit beta type-5                          | -0.0441079431417478  | 0.739747079567468 | 0.928416888458789 | NA            | aag03050       | NA                                                                                 | XP_001663403.2proteasome subunit beta type-5                                       |
| AAEL0020i RING finger protein 141                                 | -0.0440513720232783  | 0.801077973275278 | 0.946215055875588 | NA            | NA             | KFB36805.1 AGAPO0                                                                  | XP_001654584.1RING finger protein 141                                              |
| AAEL0009f sorting nexin-8                                         | -0.0440104871960238  | 0.785679767842087 | 0.944372632355572 | NA            | NA             | XP_019539822.1 PRE                                                                 | XP_001657470.1sorting nexin-8 isoform X3                                           |
| AAEL0244c NA                                                      | -0.0439489032142082  | 0.770308115770694 | 0.941147080452193 | NA            | NA             | NA                                                                                 | XP_021697042.1uncharacterized protein LOC110675699                                 |
| AAEL0119i fumarylacetoacetase                                     | -0.04394307213117695 | 0.739741930438733 | 0.928416888458789 | 00643 ; 00350 | aag01100 ; aag | KXJ77662.1 hypothei                                                                | XP_019543619.1 fumarylacetoacetase-like                                            |
| AAEL0073f ferritin subunit                                        | -0.04387518534515174 | 0.720484673822222 | 0.921583569204186 | NA            | NA             | P41822.2 RecName: I                                                                | XP_001652731.2ferritin subunit isoform X2                                          |
| AAEL0016i protein shuttle craft                                   | -0.0438346435220246  | 0.687661672131148 | 0.916010156153545 | NA            | NA             | KXJ80724.1 hypothei                                                                | XP_001653734.1protein shuttle craft                                                |
| AAEL0183c NA                                                      | -0.0437857199763688  | 0.701510279596753 | 0.916878235043446 | NA            | NA             | NA                                                                                 | XP_021708223.1oxysterol-binding protein 1 isoform X4                               |
| AAEL0230c NA                                                      | -0.0436302640314151  | 0.875967216166725 | 0.969652664055335 | NA            | NA             | NA                                                                                 | KFB40758.1AGAPO01925-like protein                                                  |
| AAEL0221c NA                                                      | -0.0435608584900855  | 0.78302251428024  | 0.94397254618785  | NA            | NA             | NA                                                                                 | NA                                                                                 |
| AAEL0017f E3 ubiquitin-protein ligase LRSAM1                      | -0.0434497088267543  | 0.768814541199179 | 0.940525313495725 | NA            | NA             | KXJ71849.1 hypothei                                                                | XP_001653956.2E3 ubiquitin-protein ligase LRSAM1                                   |
| AAEL0264c NA                                                      | -0.0434393030104141  | 0.755231958660409 | 0.934127170333935 | NA            | aag04013       | NA                                                                                 | XP_021700055.1uncharacterized protein LOC5564083 isoform X1                        |
| AAEL0039f dehydrogenase/reductase SDR family member 7             | -0.0433253166289238  | 0.873598442436272 | 0.969470919838227 | NA            | NA             | KXJ79971.1 hypothei                                                                | XP_001648135.2dehydrogenase/reductase SDR family member 7                          |
| AAEL0074f uncharacterized aarF domain-containing protein kinase 5 | -0.0431446759586249  | 0.847866873203491 | 0.963435772275933 | NA            | NA             | KXJ79918.1 hypothei                                                                | XP_001658384.1uncharacterized aarF domain-containing protein kinase 5              |
| AAEL0111f inactive hydroxysteroid dehydrogenase-like protein 1    | -0.0430632149527347  | 0.782405929565225 | 0.943962424451135 | NA            | NA             | XP_001850197.1 stei                                                                | XP_021701876.1inactive hydroxysteroid dehydrogenase-like protein 1                 |
| AAEL0109i ATP-binding cassette sub-family F member 2              | -0.0429956872539838  | 0.746074754160607 | 0.931365937538534 | NA            | NA             | ETN65975.1 hypothe                                                                 | XP_001661220.1ATP-binding cassette sub-family F member 2                           |
| AAEL0129f pescadillo homolog                                      | -0.0428793747657423  | 0.700574622147021 | 0.916629842461068 | NA            | NA             | NA                                                                                 | XP_001656318.2pescadillo homolog                                                   |
| AAEL0007f glycogen phosphorylase                                  | -0.0427634904877454  | 0.79237317083991  | 0.945793949302124 | 500           | aag01100 ; aag | KFB39704.1 hypothe                                                                 | XP_001650265.1glycogen phosphorylase                                               |
| AAEL0084f uncharacterized protein C18orf8                         | -0.0426412130065618  | 0.802498114108213 | 0.94649029363412  | NA            | NA             | KXJ71556.1 hypothei                                                                | XP_001659265.1uncharacterized protein C18orf8                                      |
| AAEL0031i uncharacterized LOC5577285                              | -0.042578883245711   | 0.834004774617535 | 0.959935536312959 | NA            | NA             | KXJ00112.1 hypothei                                                                | XP_019558256.1 zinc finger protein 84-like                                         |
| AAEL0239f NA                                                      | -0.042492868424762   | 0.775631443896273 | 0.941847042163971 | NA            | aag03010       | NA                                                                                 | XP_019531418.1 40S ribosomal protein S4                                            |
| AAEL0012i diacylglycerol O-acyltransferase 1                      | -0.0424084562511738  | 0.699299947048794 | 0.916629842461068 | 00561 ; 00073 | aag01100 ; aag | KXJ76146.1 hypothei                                                                | XP_021703032.1diacylglycerol O-acyltransferase 1                                   |
| AAEL0051c liprin-beta-2                                           | -0.0423065747840309  | 0.74416428352764  | 0.930913504217149 | NA            | NA             | NA                                                                                 | XP_021711268.1liprin-beta-2 isoform X8                                             |
| AAEL0069f syntaxin-binding protein 5                              | -0.0421664098237585  | 0.738937170862831 | 0.92803958695205  | NA            | NA             | XP_019534132.1 PRE                                                                 | XP_021707650.1syntaxin-binding protein 5 isoform X4                                |
| AAEL0169f transforming acidic coiled-coil-containing protein 1    | -0.0420968062868617  | 0.70946216913357  | 0.918410624324032 | NA            | NA             | NA                                                                                 | XP_021713132.1transforming acidic coiled-coil-containing protein 2 isoform X3      |
| AAEL0104f ataxin-10                                               | -0.042072709043245   | 0.76798447586771  | 0.940009729573645 | NA            | NA             | NA                                                                                 | XP_019562355.1 ataxin-10                                                           |
| AAEL0031i zinc finger protein 93                                  | -0.0418742452777239  | 0.839867111137136 | 0.963047620770582 | NA            | NA             | KFB36177.1 AGAPO0                                                                  | XP_001656328.1zinc finger protein 93                                               |
| AAEL0116f corepressor interacting with RBPJ 1                     | -0.0417725072144629  | 0.838041502521917 | 0.962348963212321 | NA            | aag04330       | KFB48459.1 AGAPO0                                                                  | XP_001661842.1corepressor interacting with RBPJ 1                                  |
| AAEL0087i myosin-10                                               | -0.0416040595241032  | 0.766453392441091 | 0.939178856256477 | NA            | NA             | KXJ72317.1 hypothei                                                                | XP_019532934.1 transcriptional regulator ATRX homolog isoform X3                   |
| AAEL0102f E3 ubiquitin-protein ligase SMURF2                      | -0.041562579752337   | 0.707640588258238 | 0.91977784850989  | NA            | aag04144 ; aag | NA                                                                                 | XP_021709006.1E3 ubiquitin-protein ligase SMURF2                                   |
| AAEL0135i tissue inhibitor of metalloproteases                    | -0.0415396844491112  | 0.752353953876227 | 0.932695238282356 | NA            | NA             | XP_001663710.1tissue inhibitor of metalloproteases                                 | XP_001663710.1tissue inhibitor of metalloproteases                                 |
| AAEL0048f protein lin-7 homolog C                                 | -0.0414346474639352  | 0.795013714176475 | 0.945793949302124 | NA            | NA             | KFB48553.1 AGAPO0                                                                  | XP_001649906.1protein lin-7 homolog C                                              |
| AAEL0183i NA                                                      | -0.0412743135257317  | 0.897166275915993 | 0.973750254467651 | NA            | NA             | XP_021710370.1voltage-dependent calcium channel type A subunit alpha-1 isoform X14 | XP_021710370.1voltage-dependent calcium channel type A subunit alpha-1 isoform X14 |
| AAEL0108f protein SET                                             | -0.0412478593110863  | 0.742734173483891 | 0.930112144847571 | NA            | NA             | KFB37348.1 SET, put.                                                               | XP_001655006.1protein SET                                                          |
| AAEL0087i uncharacterized protein CG7065                          | -0.0412394855485314  | 0.790410307937579 | 0.945793949302124 | NA            | NA             | XP_021710338.1uncharacterized protein CG7065 isoform X2                            | XP_021710338.1uncharacterized protein CG7065 isoform X2                            |
| AAEL0006f gonadal protein gdl                                     | -0.04111127169692319 | 0.871757497410498 | 0.969029518523332 | NA            | NA             | XP_001847521.1 gon                                                                 | XP_021710495.1gonadal protein gdl                                                  |
| AAEL0024i transcription factor IIIB 90 kDa subunit                | -0.0410502117659373  | 0.88081765126612  | 0.969743049934758 | NA            | NA             | XP_019554049.1 PRE                                                                 | XP_001655206.2transcription factor IIIB 90 kDa subunit                             |
| AAEL0226f NA                                                      | -0.0409807332298642  | 0.860626498626758 | 0.966023193669005 | NA            | NA             | NA                                                                                 | XP_021713286.1uncharacterized protein LOC5574046                                   |
| AAEL0212f NA                                                      | -0.0408734274367108  | 0.792573675210499 | 0.945793949302124 | NA            | NA             | NA                                                                                 | XP_021710307.1zinc finger protein Xfin                                             |
| AAEL0101i carbohydrate sulfotransferase 11                        | -0.0408257765352357  | 0.880654880866273 | 0.969743049934758 | NA            | NA             | XP_021702733.1carbohydrate sulfotransferase 11                                     | XP_021702733.1carbohydrate sulfotransferase 11                                     |
| AAEL0280i NA                                                      | -0.0407869963668235  | 0.910495850892956 | 0.97691422813284  | NA            | NA             | NA                                                                                 | NA                                                                                 |
| AAEL0134i NA                                                      | -0.0406610233881958  | 0.808386586546417 | 0.948581148865102 | NA            | NA             | XP_001663604.2uncharacterized protein LOC5577934                                   | XP_001663604.2uncharacterized protein LOC5577934                                   |
| AAEL0005f C-type lectin 37Da                                      | -0.0405924685531664  | 0.877511252601258 | 0.969652664055335 | NA            | NA             | KXJ70118.1 hypothei                                                                | XP_001647954.2C-type lectin 37Da                                                   |
| AAEL0039i tRNA (guanine[10]-N2)-methyltransferase homolog         | -0.0405639109052482  | 0.84714212333874  | 0.963198678766584 | NA            | NA             | XP_001847378.1 con                                                                 | XP_001647995.2tRNA (guanine[10]-N2)-methyltransferase homolog                      |
| AAEL0070f facilitated trehalose transporter Tret1                 | -0.0405358882866155  | 0.843036619691284 | 0.963198678766584 | NA            | NA             | ETN66996.1 sugar tri                                                               | XP_001652519.1facilitated trehalose transporter Tret1                              |
| AAEL0087f protein suppressor of white apricot                     | -0.040530684880993   | 0.837652312380809 | 0.962348963212321 | NA            | NA             | KXJ77860.1 hypothei                                                                | XP_001659442.2protein suppressor of white apricot                                  |
| AAEL0088f RING finger protein 10                                  | -0.0403904135227329  | 0.722654680291116 | 0.921934742632737 | NA            | NA             | KXJ72061.1 hypothei                                                                | XP_001653450.2RING finger protein 10                                               |
| AAEL0085f SRSF protein kinase 3                                   | -0.0403523515280611  | 0.745202600890243 | 0.931365937538534 | NA            | NA             | CRL00473.1 CLUMA_                                                                  | XP_021697362.1SRSF protein kinase 3                                                |
| AAEL0097f uncharacterized LOC5572322                              | -0.0403521323339281  | 0.912159402599613 | 0.977296280428831 | NA            | NA             | NA                                                                                 | XP_001653998.1uncharacterized protein LOC5572322                                   |
| AAEL0060f uncharacterized LOC567384                               | -0.0403029780214765  | 0.867216632162845 | 0.96822706250455  | NA            | NA             | XP_001848991.1 bet                                                                 | XP_001651785.2uncharacterized protein LOC5567384                                   |
| AAEL0050i uncharacterized LOC5                                    |                      |                   |                   |               |                |                                                                                    |                                                                                    |

|                                                                          |                      |                   |                   |                         |                    |                                                                            |                                                                                         |
|--------------------------------------------------------------------------|----------------------|-------------------|-------------------|-------------------------|--------------------|----------------------------------------------------------------------------|-----------------------------------------------------------------------------------------|
| AAEL00497 protein transport protein Sec24C                               | -0.0389332191787352  | 0.72279400569162  | 0.921934742632737 | NA                      | aag04141           | KXJ83215.1 hypotheI                                                        | XP_001650130.2protein transport protein Sec24C                                          |
| AAEL00306 NA                                                             | -0.0388629884156604  | 0.816219331096653 | 0.952319314767154 | NA                      | NA                 | NA                                                                         | AAK72504.1putative chymotrypsin-like protein                                            |
| AAEL0171f cleavage and polyadenylation specificity factor subunit CG7185 | -0.0387224634361009  | 0.808352351020908 | 0.948581148865102 | NA                      | aag03015           | NA                                                                         | XP_011493066.2cleavage and polyadenylation specificity factor subunit CG7185 isoform X2 |
| AAEL0215f NA                                                             | -0.0387223722982453  | 0.736026047008733 | 0.927161080221186 | NA                      | NA                 | NA                                                                         | XP_021697717.1uncharacterized protein LOC5574982 isoform X1                             |
| AAEL0060f nuclear protein localization protein 4 homolog                 | -0.038665387581787   | 0.79652825752884  | 0.945890571556554 | NA                      | aag04141           | XP_019528200.1 PRE                                                         | XP_021704785.1nuclear protein localization protein 4 homolog isoform X1                 |
| AAEL0049f geranylgeranyl pyrophosphate synthase                          | -0.038584117506974   | 0.84667095425196  | 0.963198678766584 | NA                      | aag01100 ; aag     | ETN62676.1 quema                                                           | XP_001650014.1geranylgeranyl pyrophosphate synthase                                     |
| AAEL0006f COP9 signalosome complex subunit 7b                            | -0.0385614932708643  | 0.743341791973276 | 0.930390529072101 | NA                      | NA                 | XP_019557026.1 PRE                                                         | XP_001649790.1COP9 signalosome complex subunit 7b isoform X2                            |
| AAEL0100f spermidine synthase-like                                       | -0.0385518313182305  | 0.805874785783985 | 0.947456393630119 | 00410 ; 00270 ; 00330 ; | aag01100 ; aag     | NA                                                                         | XP_001660614.1spermidine synthase isoform X1                                            |
| AAEL0054f ABC transporter G family member 20                             | -0.0382622394032914  | 0.830756933999155 | 0.958693918567873 | NA                      | NA                 | XP_019540395.1 PRE                                                         | XP_001650952.2ABC transporter G family member 20 isoform X1                             |
| AAEL0102f uncharacterized LOC5575726                                     | -0.0382301980682756  | 0.918990808221795 | 0.979901902347272 | NA                      | NA                 | KXJ78342.1 hypotheI                                                        | XP_001662163.1uncharacterized protein LOC5575726 isoform X1                             |
| AAEL0207f NA                                                             | -0.0381876164459087  | 0.795467545623083 | 0.945890571556554 | NA                      | NA                 | NA                                                                         | NA                                                                                      |
| AAEL0068f sorting nexin-17                                               | -0.0381709308266778  | 0.841021339833924 | 0.963198678766584 | NA                      | NA                 | KXJ84570.1 hypotheI                                                        | XP_001652281.1sorting nexin-17                                                          |
| AAEL0062f uncharacterized LOC5567640                                     | -0.0381608240918616  | 0.924287572879198 | 0.981795480276391 | NA                      | NA                 | KXJ77715.1 hypotheI                                                        | CAD27928.1putative G-protein coupled receptor                                           |
| AAEL0088f RAC serine/threonine-protein kinase                            | -0.038127650796382   | 0.789887628037133 | 0.945793949302124 | 04151 ; 05165 ; 04714 ; | aag04150 ; aag     | XP_001849257.1 rac                                                         | XP_001659505.1RAC serine/threonine-protein kinase                                       |
| AAEL0015f zinc finger protein 665                                        | -0.0381162440763719  | 0.786345984560329 | 0.944549897171207 | NA                      | NA                 | NA                                                                         | XP_021711477.1zinc finger protein 665 isoform X6                                        |
| AAEL0278f NA                                                             | -0.0379852537779448  | 0.895834914147141 | 0.97325535773105  | NA                      | NA                 | NA                                                                         | XP_021693924.1transcription factor grauzone                                             |
| AAEL0063f 26S proteasome non-ATPase regulatory subunit 2                 | -0.03794103555043675 | 0.752004184937614 | 0.932629041660887 | NA                      | aag03050           | ETN59915.1 26S prot                                                        | XP_001651894.126S proteasome non-ATPase regulatory subunit 2                            |
| AAEL0020f phosphorylated adapter RNA export protein                      | -0.0379232799087193  | 0.804308859570721 | 0.946758462778864 | NA                      | aag03013           | KXJ74362.1 hypotheI                                                        | XP_021703269.1phosphorylated adapter RNA export protein isoform X2                      |
| AAEL0063f 39S ribosomal protein L39, mitochondrial                       | -0.0379049399651304  | 0.779385480525962 | 0.943566949556407 | NA                      | NA                 | KXJ69955.1 hypotheI                                                        | XP_001657756.239S ribosomal protein L39, mitochondrial                                  |
| AAEL0043f 39S ribosomal protein L19, mitochondrial                       | -0.0378512073171623  | 0.800540304981258 | 0.946215055875588 | NA                      | aag03010           | KXJ69143.1 hypotheI                                                        | XP_001648902.139S ribosomal protein L19, mitochondrial                                  |
| AAEL0015f mucollipin-3                                                   | -0.0378099611502919  | 0.782095459933584 | 0.943962424451135 | NA                      | NA                 | KXJ77966.1 hypotheI                                                        | XP_021695946.1mucollipin-3 isoform X1                                                   |
| AAEL0038f ryanodine receptor                                             | -0.037734602002014   | 0.744509016690338 | 0.931218155713536 | NA                      | NA                 | NA                                                                         | XP_021707515.1ryanodine receptor isoform X3                                             |
| AAEL0023f UPF0428 protein CG16865                                        | -0.0377188105125872  | 0.857754559053501 | 0.964980728557884 | NA                      | NA                 | XP_001841725.1 con                                                         | XP_001655133.2UPF0428 protein CG16865                                                   |
| AAEL0049f peroxisomal biogenesis factor 19                               | -0.0376848278381508  | 0.729628203239782 | 0.924035057282201 | NA                      | aag04146           | XP_001850749.1 per                                                         | XP_001650131.1peroxisomal biogenesis factor 19                                          |
| AAEL0119f alpha-mannosidase 2                                            | -0.0376617634476052  | 0.794882255066626 | 0.945793949302124 | 00513 ; 00510           | aag01100 ; aag     | KXJ72595.1 hypotheI                                                        | XP_021693765.1alpha-mannosidase 2 isoform X2                                            |
| AAEL0100f cytochrome b5                                                  | -0.0375163043991512  | 0.729425488473788 | 0.923905845405959 | NA                      | NA                 | NA                                                                         | XP_001660580.2cytochrome b5                                                             |
| AAEL0064f 37 kDa salivary gland allergen Aed a 2-like                    | -0.037464346518231   | 0.833620174666218 | 0.959902797120062 | NA                      | NA                 | AAV90665.1 long for                                                        | XP_001657778.137 kDa salivary gland allergen Aed a 2-like                               |
| AAEL0019f peroxiredoxin-5, mitochondrial                                 | -0.0373155028079964  | 0.743800483865428 | 0.930716461861527 | 480                     | aag04146           | KXJ73433.1 hypotheI                                                        | XP_001658149.1peroxiredoxin-5, mitochondrial                                            |
| AAEL0009f 60S ribosomal protein L8                                       | -0.0372688310740903  | 0.809086334738348 | 0.948933370455872 | NA                      | aag03010           | ETN58771.1 60S ribo                                                        | XP_001657711.160S ribosomal protein L8                                                  |
| AAEL0243f NA                                                             | -0.0372634782729965  | 0.850034426422298 | 0.96443951617769  | NA                      | NA                 | NA                                                                         | NA                                                                                      |
| AAEL0058f negative elongation factor A                                   | -0.0372019314916118  | 0.82439754150494  | 0.954996283354524 | NA                      | NA                 | KXJ71978.1 hypotheI                                                        | XP_021712857.1negative elongation factor A                                              |
| AAEL0117f eukaryotic peptide chain release factor subunit 1              | -0.0371675364368491  | 0.751610224089225 | 0.932629041660887 | NA                      | aag03015           | ETN68111.1 eukaryo                                                         | XP_001661879.1eukaryotic peptide chain release factor subunit 1                         |
| AAEL0067f endoribonuclease Dicer                                         | -0.036998995908619   | 0.766986907790825 | 0.939413486868563 | NA                      | NA                 | AEX31247.1 Dicer 2 i                                                       | XP_001652212.1endoribonuclease Dicer                                                    |
| AAEL0030f glutamate-gated chloride channel                               | -0.0369807119661119  | 0.824543085334894 | 0.954996283354524 | NA                      | NA                 | XP_019548992.1 PRE                                                         | XP_001662897.2glutamate-gated chloride channel isoform X9                               |
| AAEL0120f regulator of gene activity                                     | -0.0368997121444117  | 0.766364632972825 | 0.939178856256477 | NA                      | aag03018           | XP_019563593.1 PRE                                                         | XP_001655826.2regulator of gene activity isoform X1                                     |
| AAEL0098f protein kinase C-binding protein 1                             | -0.0367056055977927  | 0.783464763226663 | 0.94413865259452  | NA                      | NA                 | XP_021708614.1protein kinase C-binding protein 1                           | XP_001651901.1isoform X1                                                                |
| AAEL0123f NA                                                             | -0.0367035749205401  | 0.898567209120305 | 0.973780616635202 | NA                      | NA                 | KFB42793.1 AGAP00                                                          | XP_021706790.1lachesin                                                                  |
| AAEL0030f chitinase-3-like protein 1                                     | -0.0365113748414785  | 0.785711461998941 | 0.944372632355572 | 520                     | NA                 | XP_001841679.1 chit                                                        | XP_001663099.2chitinase-3-like protein 1                                                |
| AAEL0267f NA                                                             | -0.036488354740352   | 0.759076821653001 | 0.935439571457873 | NA                      | NA                 | NA                                                                         | NA                                                                                      |
| AAEL0275f NA                                                             | -0.0363913579597187  | 0.871959590284984 | 0.969029518523332 | NA                      | NA                 | NA                                                                         | XP_021703450.1zinc finger protein 585A                                                  |
| AAEL0230f NA                                                             | -0.0362420329392137  | 0.918571529215868 | 0.979722358282524 | NA                      | NA                 | NA                                                                         | XP_021693789.1transcription factor grauzone                                             |
| AAEL0074f uncharacterized LOC5569178                                     | -0.0362410225086187  | 0.74970601467263  | 0.932554085844433 | NA                      | NA                 | NA                                                                         | XP_001652757.1uncharacterized protein LOC5569178 isoform X7                             |
| AAEL0077f E3 ubiquitin-protein ligase HECTD1                             | -0.0361790884328287  | 0.739698108662434 | 0.928416888487898 | NA                      | NA                 | KXJ76966.1 hypotheI                                                        | XP_021704014.1E3 ubiquitin-protein ligase HECTD1 isoform X1                             |
| AAEL0046f RING-box protein 1A                                            | -0.0361685459472146  | 0.781514128821393 | 0.943962424451135 | aag04141 ; aag          | ETN65005.1 hypothe | XP_001649597.1RING-box protein 1A isoform X2                               |                                                                                         |
| AAEL0061f solute carrier family 12 member 1                              | -0.0360211461882089  | 0.823457878102849 | 0.954580422562662 | NA                      | NA                 | XP_019546027.1 PRE                                                         | XP_021709422.1solute carrier family 12 member 1 isoform X1                              |
| AAEL0069f endothelial lipase                                             | -0.0359720779181121  | 0.788412163412932 | 0.945232821987723 | NA                      | NA                 | XP_019561736.1 PRE                                                         | XP_001493040.1endothelial lipase isoform X2                                             |
| AAEL0105f probable lysine-specific demethylase 4A                        | -0.0358204509326608  | 0.854449064888805 | 0.964859528176068 | NA                      | NA                 | XP_021696026.1probable lysine-specific demethylase 4A                      |                                                                                         |
| AAEL0084f NADH dehydrogenase [ubiquinone] 1 beta subcomplex subunit 7    | -0.0357576158630409  | 0.796737542411645 | 0.945890571556554 | NA                      | aag01100 ; aag     | KFB36547.1 AGAP00                                                          | XP_021695784.1NADH dehydrogenase [ubiquinone] 1 beta subcomplex subunit 7 isoform X2    |
| AAEL0235f NA                                                             | -0.0356988366083087  | 0.879795922556768 | 0.969652664055335 | NA                      | NA                 | XP_021698055.1uncharacterized protein LOC110676020 isoform X2              |                                                                                         |
| AAEL0049f uncharacterized LOC5565651                                     | -0.0356466687539867  | 0.772908911234024 | 0.941230906670349 | NA                      | NA                 | KXJ70232.1 hypotheI                                                        | XP_019525207.1 monocarboxylate transporter 9-like                                       |
| AAEL0206f NA                                                             | -0.0356016163985536  | 0.907630406766221 | 0.976056966800435 | NA                      | NA                 | XP_021694824.1uncharacterized protein LOC5564702                           |                                                                                         |
| AAEL0035f probable RNA methyltransferase bin3                            | -0.0353984511290626  | 0.833064946275111 | 0.959902797120062 | NA                      | NA                 | XP_001842602.1 bicr                                                        | XP_001656911.2probable RNA methyltransferase bin3                                       |
| AAEL0092f DNA-directed RNA polymerase III subunit RPC7                   | -0.0353941926884983  | 0.876593125460597 | 0.969652664055335 | NA                      | aag03020           | NA                                                                         | XP_001659808.1DNA-directed RNA polymerase III subunit RPC7                              |
| AAEL0064f piezo-type mechanosensitive ion channel component              | -0.0353544332207768  | 0.770172240988009 | 0.941147080452193 | NA                      | NA                 | XP_021703544.1piezo-type mechanosensitive ion channel component isoform X4 |                                                                                         |
| AAEL0123f dyslexia-associated protein KIAA0319-like protein              | -0.0352609873530582  | 0.846243035777386 | 0.963198678766584 | NA                      | NA                 | KXJ75399.1 hypotheI                                                        | XP_021701542.1dyslexia-associated protein KIAA0319-like protein                         |
| AAEL0006f MAPK regulated corepressor interacting protein 2               | -0.0352122685444383  | 0.804825482059948 | 0.94691992227708  | NA                      | NA                 | ETN67                                                                      |                                                                                         |

|                                                                                    |                      |                    |                   |                         |                                                                                                        |                                                                                                      |
|------------------------------------------------------------------------------------|----------------------|--------------------|-------------------|-------------------------|--------------------------------------------------------------------------------------------------------|------------------------------------------------------------------------------------------------------|
| AAEL0004 <sup>‡</sup> uncharacterized LOC5577375                                   | -0.0334474214763943  | 0.885937973500121  | 0.9709344693273   | NA                      | NA                                                                                                     | KXJ81286.1 hypothe! XP_001656458.2.uncharacterized protein LOC5577375                                |
| AAEL00591 mitochondrial import inner membrane translocase subunit TIM14            | -0.033445262873331   | 0.830690664069123  | 0.958693918567873 | NA                      | NA                                                                                                     | CRLO5696.1 CLUMA_ XP_001651592.1.mitochondrial import inner membrane translocase subunit TIM14       |
| AAEL0151 <sup>‡</sup> lysosomal acid phosphatase                                   | -0.033273817523406   | 0.78600945159391   | 0.944840654958483 | NA                      | aag01100 ; aag NA                                                                                      | XP_021713013.1.lysosomal acid phosphatase                                                            |
| AAEL0106 <sup>‡</sup> SUMO-activating enzyme subunit 2                             | -0.0331432599888711  | 0.819823355614266  | 0.953369710395865 | NA                      | aag04120                                                                                               | KXJ77119.1 hypothe! XP_021700868.1SUMO-activating enzyme subunit 2                                   |
| AAEL0084 <sup>‡</sup> uncharacterized LOC5570603                                   | -0.0331303005114276  | 0.914126767425525  | 0.977828474226146 | NA                      | XP_001846553.1 con XP_019564121.1 zinc finger protein 26-like isoform X1                               |                                                                                                      |
| AAEL0044 <sup>‡</sup> PRADC1-like protein                                          | -0.032999887027825   | 0.846801862459674  | 0.963198678766584 | NA                      | NA                                                                                                     | XP_001864704.1 PA_ XP_001649070.1PRADC1-like protein                                                 |
| AAEL0060 <sup>‡</sup> dihydroorotate dehydrogenase (quinone), mitochondrial        | -0.0329456632331167  | 0.857702295178606  | 0.964980728557884 | 240                     | aag01100 ; aag XP_001843565.1 diH_ XP_001657386.1dihydroorotate dehydrogenase (quinone), mitochondrial |                                                                                                      |
| AAEL0118 <sup>‡</sup> protein arginine N-methyltransferase 7                       | -0.0329001456055627  | 0.882699047129847  | 0.970357617045106 | NA                      | NA                                                                                                     | XP_019541694.1 PRÉ XP_001662010.2.protein arginine N-methyltransferase 7 isoform X1                  |
| AAEL00141 <sup>‡</sup> yrdC domain-containing protein, mitochondrial               | -0.0327974698515935  | 0.930892710102811  | 0.98347583693566  | NA                      | NA                                                                                                     | ETN61266.1 ischemic XP_021696425.1.yrdC domain-containing protein, mitochondrial                     |
| AAEL0064 <sup>‡</sup> alcohol dehydrogenase class-3                                | -0.0327391042994144  | 0.800431439169778  | 0.946215055875588 | 00626 ; 00260 ; 00592 ; | aag01100 ; aag                                                                                         | KXJ76169.1 hypothe! XP_021705167.1.alcohol dehydrogenase class-3                                     |
| AAEL0058 <sup>‡</sup> mediator of RNA polymerase II transcription subunit 12       | -0.0327378816226698  | 0.758232325971356  | 0.935439571457873 | NA                      | NA                                                                                                     | KXJ75245.1 hypothe! XP_001651515.2.mediator of RNA polymerase II transcription subunit 12 isoform X1 |
| AAEL0105 <sup>‡</sup> uncharacterized LOC5573481                                   | -0.032572722430716   | 0.717130304827363  | 0.941147080452193 | 00564 ; 00591 ; 00565 ; | NA                                                                                                     | XP_021696025.1.uncharacterized protein LOC5573481                                                    |
| AAEL0201 <sup>‡</sup> NA                                                           | -0.0324840520903655  | 0.845044693918794  | 0.963198678766584 | NA                      | NA                                                                                                     | XP_019524901.1 FK506-binding protein 5-like                                                          |
| AAEL0119 <sup>‡</sup> ER membrane protein complex subunit 7 homolog                | -0.0323994727297957  | 0.803692743984493  | 0.94649029363412  | NA                      | NA                                                                                                     | KXJ68818.1 hypothe! XP_001655787.1.ER membrane protein complex subunit 7 homolog                     |
| AAEL0256 <sup>‡</sup> NA                                                           | -0.0322251534683268  | 0.914283437539857  | 0.977828474226146 | NA                      | NA                                                                                                     | XP_019562153.1 dentin sialophosphoprotein-like                                                       |
| AAEL0197 <sup>‡</sup> NA                                                           | -0.0320613219883906  | 0.786833751271699  | 0.944549897171207 | aag03013                | NA                                                                                                     | XP_021710520.1.nucleoprotein TPR isoform X2                                                          |
| AAEL0205 <sup>‡</sup> NA                                                           | -0.0320477254970625  | 0.781125831030499  | 0.943915941844077 | NA                      | NA                                                                                                     | XP_021694927.1.protein lava lamp isoform X1                                                          |
| AAEL0173 <sup>‡</sup> CREB-binding protein                                         | -0.0320364425869381  | 0.814830005726223  | 0.952015623780574 | NA                      | aag04310 ; aag NA                                                                                      | XP_011493407.2.CREB-binding protein                                                                  |
| AAEL0062 <sup>‡</sup> uncharacterized LOC5567702                                   | -0.0320078560028501  | 0.875029568514496  | 0.969652664055335 | NA                      | NA                                                                                                     | KXJ80547.1 hypothe! XP_001651868.2.uncharacterized protein LOC5567702                                |
| AAEL0124 <sup>‡</sup> cytokine receptor                                            | -0.0318752966968871  | 0.81127218999283   | 0.95010454605765  | NA                      | NA                                                                                                     | KXJ75591.1 hypothe! XP_001662596.2.cytokine receptor                                                 |
| AAEL0113 <sup>‡</sup> calcium uptake protein 3, mitochondrial                      | -0.0318727135679989  | 0.853352151808545  | 0.964653958545747 | NA                      | NA                                                                                                     | ETN62282.1 hypothe XP_021711097.1.calcium uptake protein 3, mitochondrial                            |
| AAEL0009 <sup>‡</sup> organic cation transporter protein                           | -0.0318238590405631  | 0.796796533282226  | 0.945890571556554 | NA                      | NA                                                                                                     | KFB47260.1 AGAP01_ XP_001651636.1.organic cation transporter protein                                 |
| AAEL0064 <sup>‡</sup> dmX-like protein 2                                           | -0.031682893410782   | 0.785580277124042  | 0.944372632355572 | NA                      | XP_019527390.1 PRÉ XP_021711001.1dmX-like protein 2 isoform X2                                         |                                                                                                      |
| AAEL0195 <sup>‡</sup> NA                                                           | -0.0316502362252036  | 0.816570268736952  | 0.952319314767154 | NA                      | NA                                                                                                     | XP_021693883.1.growth/differentiation factor 8                                                       |
| AAEL0143 <sup>‡</sup> uncharacterized LOC5564282                                   | -0.0315592407294313  | 0.772176684358961  | 0.941147080452193 | NA                      | NA                                                                                                     | XP_019560966.1 intracellular protein transport protein USO1-like                                     |
| AAEL0113 <sup>‡</sup> guanine nucleotide-binding protein subunit gamma-1           | -0.0315452397457926  | 0.775917695505476  | 0.941848282418248 | NA                      | NA                                                                                                     | CRK89209.1 CLUMA_ XP_019537662.1 guanine nucleotide-binding protein subunit gamma-1                  |
| AAEL0135 <sup>‡</sup> leukocyte receptor cluster member 1 homolog                  | -0.0314670420981979  | 0.92908637031292   | 0.983153242837943 | NA                      | NA                                                                                                     | XP_001663683.2.leukocyte receptor cluster member 1 homolog                                           |
| AAEL0139 <sup>‡</sup> trafficking protein particle complex subunit 12              | -0.0312488093944548  | 0.892096127171212  | 0.97252322736992  | NA                      | NA                                                                                                     | XP_001664113.2.trafficking protein particle complex subunit 12                                       |
| AAEL0017 <sup>‡</sup> WASH complex subunit 3                                       | -0.03121155000523693 | 0.886586181910204  | 0.9709344693273   | NA                      | aag04144                                                                                               | XP_001845661.1 coil XP_001653954.1WASH complex subunit 3                                             |
| AAEL0077 <sup>‡</sup> transmembrane protein 205                                    | -0.0312047635155531  | 0.846229196453807  | 0.963198678766584 | NA                      | NA                                                                                                     | KXJ73238.1 hypothe! XP_001658641.1.transmembrane protein 205                                         |
| AAEL0135 <sup>‡</sup> steroid hormone receptor ERR2                                | -0.0311901278983784  | 0.878836315026149  | 0.969652664055335 | NA                      | NA                                                                                                     | XP_021712961.1.steroid hormone receptor ERR2 isoform X1                                              |
| AAEL0235 <sup>‡</sup> NA                                                           | -0.031132784087368   | 0.886630877513905  | 0.9709344693273   | NA                      | aag01100 ; aag NA                                                                                      | XP_021693399.1.cGMP-specific 3',5'-cyclic phosphodiesterase isoform X4                               |
| AAEL0214 <sup>‡</sup> NA                                                           | -0.0309650401166997  | 0.788144533726793  | 0.945198227466955 | NA                      | NA                                                                                                     | XP_021694948.1.histone deacetylase 6 isoform X1                                                      |
| AAEL00581 <sup>‡</sup> 60S ribosomal protein L26                                   | -0.0309556794372603  | 0.840860900708859  | 0.963198678766584 | aag03010                | XP_001845703.1 60S XP_001651456.1.60S ribosomal protein L26                                            |                                                                                                      |
| AAEL0085 <sup>‡</sup> probable helicase with zinc finger domain                    | -0.0309500678914637  | 0.879948559928169  | 0.969652664055335 | NA                      | NA                                                                                                     | KXJ79514.1 hypothe! XP_021709050.1.probable helicase with zinc finger domain                         |
| AAEL0066 <sup>‡</sup> probable splicing factor 3B subunit 5                        | -0.030891317425279   | 0.874018860681975  | 0.969652664055335 | aag03040                | ETN67735.1 splicing! XP_001657963.1.probable splicing factor 3B subunit 5                              |                                                                                                      |
| AAEL0113 <sup>‡</sup> juvenile hormone epoxide hydrolase 1                         | -0.030836339926712   | 0.813784169946755  | 0.951275651911844 | NA                      | aag00981                                                                                               | XP_001842662.1 juv. XP_001661591.1.juvenile hormone epoxide hydrolase 1                              |
| AAEL0093 <sup>‡</sup> 3-hydroxyacyl-CoA dehydrogenase type-2                       | -0.0308168474932354  | 0.879066646152863  | 0.969652664055335 | aag01100 ; aag NA       | XP_001659937.32-hydroxyacyl-CoA dehydrogenase type-2 isoform X2                                        |                                                                                                      |
| AAEL0258 <sup>‡</sup> NA                                                           | -0.030795780270068   | 0.943509500269492  | 0.987236796207886 | NA                      | NA                                                                                                     | NA                                                                                                   |
| AAEL0043 <sup>‡</sup> transient receptor potential cation channel protein painless | -0.0307486211837403  | 0.8301298145770993 | 0.958428949419039 | NA                      | NA                                                                                                     | KXJ73830.1 hypothe! XP_001649039.2.transient receptor potential cation channel protein painless      |
| AAEL0136 <sup>‡</sup> uncharacterized LOC5578378                                   | -0.0307341989640779  | 0.790314246439659  | 0.945793949302124 | NA                      | NA                                                                                                     | XP_021695131.1.uncharacterized protein LOC5578378                                                    |
| AAEL0072 <sup>‡</sup> GTPase-activating protein CdgAPr                             | -0.0306857073632136  | 0.838478352286908  | 0.962348963212321 | NA                      | NA                                                                                                     | XP_019538075.1 PRÉ XP_021703195.1.GTPase-activating protein CdgAPr isoform X1                        |
| AAEL0119 <sup>‡</sup> venom protease                                               | -0.0305446269053832  | 0.8883514144848536 | 0.970996238637524 | NA                      | NA                                                                                                     | XP_019538334.1 PRÉ XP_001655815.2.venom protease isoform X2                                          |
| AAEL0241 <sup>‡</sup> NA                                                           | -0.0304818018640446  | 0.809700624009425  | 0.949044272688315 | NA                      | NA                                                                                                     | XP_001660916.2.sterol regulatory element-binding protein 1                                           |
| AAEL0099 <sup>‡</sup> battenin                                                     | -0.0304171159787538  | 0.846715891275152  | 0.963198678766584 | aag04142                | XP_019527975.1 battenin-like                                                                           |                                                                                                      |
| AAEL0199 <sup>‡</sup> NA                                                           | -0.0303704169376809  | 0.86422200300845   | 0.967308506393142 | aag03040                | XP_021704111.1.pre-mRNA-splicing factor ATP-dependent RNA helicase PRP16 isoform X2                    |                                                                                                      |
| AAEL0161 <sup>‡</sup> probable RNA-binding protein CG14230                         | -0.030286376825087   | 0.871281118545332  | 0.969029518523332 | NA                      | NA                                                                                                     | KXJ75936.1 hypothe! XP_021709386.1.probable RNA-binding protein CG14230                              |
| AAEL0140 <sup>‡</sup> NIF3-like protein 1                                          | -0.0302612716266911  | 0.878252063483352  | 0.969652664055335 | NA                      | NA                                                                                                     | XP_001657324.1.NIF3-like protein 1                                                                   |
| AAEL0085 <sup>‡</sup> protein maelstrom homolog                                    | -0.0302513978499297  | 0.879441925950088  | 0.969652664055335 | NA                      | NA                                                                                                     | KXJ71798.1 hypothe! XP_001653339.1.protein maelstrom homolog                                         |
| AAEL0024 <sup>‡</sup> cytochrome b561 domain-containing protein 2                  | -0.030233966694875   | 0.869105570321999  | 0.968652831735134 | NA                      | NA                                                                                                     | KXJ71716.1 hypothe! XP_001655155.1.cytochrome b561 domain-containing protein 2                       |
| AAEL0031 <sup>‡</sup> inorganic pyrophosphatase                                    | -0.0301223545793344  | 0.799293543644722  | 0.946215055875588 | 190                     | aag00190                                                                                               | XP_019931214.1 PRÉ XP_001656514.2.inorganic pyrophosphatase isoform X2                               |
| AAEL0194 <sup>‡</sup> NA                                                           | -0.0300994755804231  | 0.800059521812095  | 0.946215055875588 | NA                      | NA                                                                                                     | XP_021705248.1.putative leucine-rich repeat-containing protein DDB_G0290503                          |
| AAEL0197 <sup>‡</sup> NA                                                           | -0.0300876173002131  | 0.809375514978023  | 0.948933730455872 | NA                      | NA                                                                                                     | XP_021700107.1.heterogeneous nuclear ribonucleoprotein U                                             |
| AAEL0198 <sup>‡</sup> NA                                                           | -0.0300181029635397  | 0.879940284598033  | 0.969652664055335 | NA                      | NA                                                                                                     | XP_021694481.1.protein spitZ                                                                         |
| AAEL0210 <sup>‡</sup> NA                                                           | -0.0299092398478202  | 0.910102265918713  | 0.97691422813284  | NA                      | NA                                                                                                     | XP_019553323.1 uncharacterized threonine-rich GPI-anchored glycoprotein PJ4664.02-like               |
| AAEL0138 <sup>‡</sup> 23 kDa integral membrane protein                             | -0.0297939710591727  | 0.797415750572     |                   |                         |                                                                                                        |                                                                                                      |

|                                                                 |                      |                    |                   |                                           |                                                       |                                                                                         |
|-----------------------------------------------------------------|----------------------|--------------------|-------------------|-------------------------------------------|-------------------------------------------------------|-----------------------------------------------------------------------------------------|
| AAEL0093: carbonic anhydrase                                    | -0.02785545025996    | 0.868724740550854  | 0.968652831735134 | 910                                       | aag01100 ; aag NA                                     | XP_001659934.2carbonic anhydrase                                                        |
| AAEL0181: NA                                                    | -0.0278446694130408  | 0.897654461034872  | 0.973750254467651 | NA                                        | NA NA                                                 | XP_021699795.1uncharacterized protein LOC5567692 isoform X2                             |
| AAEL0010: proton-coupled folate transporter                     | -0.04221845756271398 | 0.842218457524109  | 0.963198678766584 | NA                                        | NA                                                    | KXJ69387.1 hypothei XP_001657891.1proton-coupled folate transporter                     |
| AAEL0078: ran GTPase-activating protein                         | -0.0278071644673011  | 0.864107543417326  | 0.967038506393142 | NA                                        | aag03013                                              | KXJ75540.1 hypothei XP_001658696.2ran GTPase-activating protein                         |
| AAEL0078: ras-related protein Rab-5B                            | -0.0277828544714191  | 0.798426943437301  | 0.946215058575588 | NA                                        | aag04144 ; aag                                        | ETN59321.1 rab5 [Ar XP_001658691.1ras-related protein Rab-5B                            |
| AAEL0195: NA                                                    | -0.0277419840303866  | 0.840426753560133  | 0.963198678766584 | NA                                        | NA NA                                                 | XP_021712987.1uncharacterized protein LOC5578982                                        |
| AAEL0107: probable cysteine desulfurase, mitochondrial          | -0.0276804146744707  | 0.793426018892387  | 0.945793949302124 | 730                                       | aag01100 ; aag                                        | KXJ76410.1 hypothei XP_021702976.1probable cysteine desulfurase, mitochondrial          |
| AAEL0078: cytochrome P450 4d2                                   | -0.0276709600950058  | 0.829714732690423  | 0.958094785081062 | NA                                        | NA                                                    | XP_019529141.1 PRE XP_001652925.2cytochrome P450 4d2 isoform X1                         |
| AAEL0104: probable histone-lysine N-methyltransferase Mes-4     | -0.0275574121537643  | 0.890512277011682  | 0.972299099940304 | 310                                       | aag01100 ; aag NA                                     | XP_001654536.2probable histone-lysine N-methyltransferase Mes-4 isoform X2              |
| AAEL0066: uncharacterized LOC5568173                            | -0.0273837077918068  | 0.847896509689378  | 0.96343572275933  | 901                                       | NA                                                    | KXJ69933.1 hypothei XP_001652109.1uncharacterized protein LOC5568173                    |
| AAEL0232: NA                                                    | -0.0272897756864684  | 0.874400497624693  | 0.969652664055335 | NA                                        | NA NA                                                 | XP_021698769.1muscle-specific protein 20                                                |
| AAEL0054: annexin B10                                           | -0.0272809073702063  | 0.874583876793728  | 0.969652664055335 | NA                                        | NA                                                    | KXJ70191.1 hypothei XP_001650849.1annexin B10 isoform X1                                |
| AAEL0017: transmembrane 7 superfamily member 3                  | -0.027264660853444   | 0.86441789129878   | 0.967038506393142 | NA                                        | NA                                                    | KXJ82648.1 hypothei XP_001653967.3transmembrane 7 superfamily member 3                  |
| AAEL0130: adenyllyl cyclase-associated protein 1                | -0.027102122782627   | 0.810335109148404  | 0.949535677369618 | NA                                        | NA NA                                                 | XP_021700501.1microtubule-associated protein futsch isoform X1                          |
| AAEL0069: NA                                                    | -0.0271339935850066  | 0.909622728717732  | 0.97691422813284  | 970                                       | aag00970                                              | KXJ78887.1 hypothei XP_001652351.2serine--tRNA synthetase-like protein Slimp            |
| AAEL0032: zinc finger FYVE domain-containing protein 26 homolog | -0.0271095820611756  | 0.821966430040594  | 0.954414522300763 | NA                                        | NA                                                    | XP_001843658.1 con XP_021693882.1zinc finger FYVE domain-containing protein 26 homolog  |
| AAEL0052: tyrosine-protein phosphatase Lar                      | -0.0270293064614257  | 0.861420106505889  | 0.96610329632302  | NA                                        | NA NA                                                 | XP_021700966.1tyrosine-protein phosphatase Lar isoform X2                               |
| AAEL0225: NA                                                    | -0.026725700821632   | 0.822641530229041  | 0.954452060294489 | NA                                        | NA NA                                                 | XP_021711033.1serine protease easter                                                    |
| AAEL0018: NA                                                    | -0.0266067359650152  | 0.857859342193171  | 0.964980728557884 | NA                                        | NA                                                    | KXJ78456.1 hypothei XP_019546847.1 protein CNPPD1-like                                  |
| AAEL0089: cysteine-rich hydrophobic domain-containing protein 2 | -0.0265532377498877  | 0.809750157245585  | 0.949044272688315 | NA                                        | NA                                                    | KXJ80109.1 hypothei XP_001653537.1cysteine-rich hydrophobic domain-containing protein 2 |
| AAEL0080: uncharacterized LOC5569932                            | -0.0265292430935472  | 0.811218737535502  | 0.95010454605765  | NA                                        | NA                                                    | KXJ74252.1 hypothei XP_001868638.1monocarboxylate transporter                           |
| AAEL0084: structure-specific endonuclease subunit SLX4          | -0.0264353223254034  | 0.888307941435225  | 0.970996238637524 | NA                                        | NA                                                    | KXJ82508.1 hypothei XP_001659271.2structure-specific endonuclease subunit SLX4          |
| AAEL0267: NA                                                    | -0.0263918160742069  | 0.806835517967965  | 0.948040966581563 | NA                                        | NA NA                                                 | XP_021700598.1protein ref(2)P                                                           |
| AAEL0066: tachykinins                                           | -0.0263607516619039  | 0.900379980056249  | 0.974065297962641 | NA                                        | NA                                                    | XP_019534849.1 PRE XP_001652135.2tachykinins isoform X1                                 |
| AAEL0231: NA                                                    | -0.02632698090828789 | 0.948354836076227  | 0.987881609350457 | NA                                        | NA NA                                                 | XP_021701669.1protein turtle homolog A                                                  |
| AAEL0183: NA                                                    | -0.0262561145153799  | 0.853806960077737  | 0.964653958545747 | NA                                        | NA NA                                                 | XP_019534720.1 ATP-dependent DNA helicase Q5                                            |
| AAEL0194: NA                                                    | -0.0261853484725853  | 0.831316864540533  | 0.958742264774772 | NA                                        | NA NA                                                 | XP_019538909.1 ras-related protein Rap-2a                                               |
| AAEL0021: transcription initiation factor IIA subunit 2         | -0.0261567594485015  | 0.853847695322225  | 0.964653958545747 | NA                                        | aag03022                                              | XP_001848846.1 tra: XP_001654851.1transcription initiation factor IIA subunit 2         |
| AAEL0109: ecdysone 20-monooxygenase                             | -0.0261461913547622  | 0.947026699656139  | 0.987707093985696 | NA                                        | aag00981                                              | XP_021712285.1ecdysone 20-monooxygenase                                                 |
| AAEL0210: NA                                                    | -0.0260444609000764  | 0.869434505100424  | 0.968652831735134 | NA                                        | NA NA                                                 | NA                                                                                      |
| AAEL0103: uncharacterized LOC5573210                            | -0.025967171351557   | 0.822838010390993  | 0.954452060294489 | NA                                        | NA NA                                                 | XP_001654430.2uncharacterized protein LOC5573210 isoform X2                             |
| AAEL0028: thioredoxin reductase 1, mitochondrial                | -0.0259326967409105  | 0.8122250202041409 | 0.950268140513817 | 450                                       | aag00450                                              | XP_019531873.1 PRE XP_001662666.1thioredoxin reductase 1, mitochondrial isoform X2      |
| AAEL0119: oxysterol-binding protein-related protein 9           | -0.0258905353470486  | 0.842871848122647  | 0.963198678766584 | NA                                        | NA                                                    | KF843298.1 hypothe XP_021699693.1oxysterol-binding protein-related protein 9 isoform X1 |
| AAEL0023: NA                                                    | -0.0258685985576786  | 0.866001494943349  | 0.967927335900485 | NA                                        | NA                                                    | XP_019551005.1 PRE XP_001655138.2zooeyc zinc finger protein XICOF6 isoform X2           |
| AAEL0073: C2 domain-containing protein 5                        | -0.0258395197730564  | 0.898797997107023  | 0.973780616635202 | NA                                        | NA                                                    | XP_019546213.1 PRE XP_021704770.1C2 domain-containing protein 5                         |
| AAEL0094: uncharacterized LOC5572004                            | -0.0257637328765551  | 0.912955591735483  | 0.977561298149576 | NA                                        | NA                                                    | XP_001660110.2uncharacterized protein LOC5572004 isoform X1                             |
| AAEL0054: melanization protease 1                               | -0.0257212897087965  | 0.876394536372094  | 0.969652664055335 | NA                                        | NA                                                    | KXJ72527.1 hypothei XP_001650899.2melanization protease 1                               |
| AAEL0051: esterase B1                                           | -0.0256768494191357  | 0.91352565706533   | 0.977731438769662 | NA                                        | NA NA                                                 | XP_021698893.1esterase B1 isoform X4                                                    |
| AAEL0042: glycogen [starch] synthase                            | -0.0255828324528868  | 0.872506532684875  | 0.969029518523332 | 500                                       | aag01100 ; aag                                        | ETN67493.1 glycogor XP_001648704.1glycogen [starch] synthase                            |
| AAEL0043: rab proteins geranylgeranyltransferase component A    | -0.025534272355101   | 0.867186974588511  | 0.96822706250455  | NA                                        | NA                                                    | XP_001855828.1 rab XP_021704602.1rab proteins geranylgeranyltransferase component A     |
| AAEL0144: cytochrome c oxidase protein 20 homolog               | -0.0255166376283254  | 0.865043278703439  | 0.967527624717057 | NA                                        | NA NA                                                 | XP_001648865.1cytochrome c oxidase protein 20 homolog                                   |
| AAEL0199: NA                                                    | -0.0254930231072573  | 0.827756456876655  | 0.956671052019465 | NA                                        | aag04512                                              | XP_021699177.1uncharacterized protein LOC5577287 isoform X1                             |
| AAEL0058: structural maintenance of chromosomes protein 1A      | -0.0254752915652597  | 0.857070906960091  | 0.964980728557884 | NA                                        | NA                                                    | CAD59403.1 SMC1 p XP_001651465.2structural maintenance of chromosomes protein 1A        |
| AAEL0000: uncharacterized LOC5563641                            | -0.025472603165731   | 0.909906436710582  | 0.97691422813284  | NA                                        | NA                                                    | KXJ82836.1 hypothei XP_001647895.2uncharacterized protein LOC5563641                    |
| AAEL0142: probable sulfite oxidase, mitochondrial               | -0.0254097174764965  | 0.893132349380332  | 0.972739913152176 | aag01100 ; aag NA                         | XP_021706109.1probable sulfite oxidase, mitochondrial |                                                                                         |
| AAEL0244: NA                                                    | -0.025338459376685   | 0.933223373981601  | 0.98347583693566  | NA                                        | NA NA                                                 | XP_021711737.1uncharacterized protein LOC110680029                                      |
| AAEL0121: caspase                                               | -0.0251406075724245  | 0.921565562068164  | 0.977354318220583 | aag04214 ; aag                            | KXJ84059.1 hypothei XP_019563286.1 caspase-like       |                                                                                         |
| AAEL0016: uncharacterized LOC5571835                            | -0.0249912671323413  | 0.89487682468168   | 0.97290365567205  | NA                                        | NA NA                                                 | XP_001659966.1uncharacterized protein LOC5571835 isoform X3                             |
| AAEL0099: probable elongation factor 1-beta                     | -0.0249653130044203  | 0.869684677168178  | 0.968652831735134 | NA                                        | NA                                                    | KXJ68189.1 hypothei XP_001657499.1probable elongation factor 1-beta                     |
| AAEL0096: glyoxylate reductase/hydroxyypyruvate reductase       | -0.02494841431271207 | 0.846408493004475  | 0.963198678766584 | NA                                        | aag01100 ; aag NA                                     | XP_001653924.1glyoxylate reductase/hydroxyypyruvate reductase                           |
| AAEL0136: N-chimaerin                                           | -0.0248739055127542  | 0.94416509368866   | 0.987296271832165 | NA                                        | NA NA                                                 | XP_019545658.1 beta-chimaerin-like                                                      |
| AAEL0181: NA                                                    | -0.0248330364570063  | 0.881034075522842  | 0.969743049934758 | NA                                        | NA NA                                                 | XP_019562558.1 mucin-5AC isoform X4                                                     |
| AAEL0003: RNA-binding protein 45                                | -0.0247998231081152  | 0.880641142108553  | 0.969743049934758 | NA                                        | NA                                                    | KXJ76011.1 hypothei XP_001656064.1RNA-binding protein 45                                |
| AAEL0282: NA                                                    | -0.0247830244469234  | 0.854148207065892  | 0.964756573145985 | NA                                        | NA NA                                                 | XP_021704122.1mediator of RNA polymerase II transcription subunit 1                     |
| AAEL0198: NA                                                    | -0.0247143021525096  | 0.918323949098633  | 0.979657756188216 | NA                                        | NA NA                                                 | XP_021702049.1receptor-type tyrosine-protein phosphatase kappa isoform X2               |
| AAEL0259: NA                                                    | -0.0247034706378647  | 0.89331088778957   | 0.972739913152176 | 00980 ; 00982 ; 00983 ; aag01100 ; aag NA | XP_021694972.1glutathione S-transferase theta-1       |                                                                                         |
| AAEL0100: protein tramtrack, beta isoform                       | -0.0245413340003782  | 0.859883407466176  | 0.965722450478577 | NA                                        | NA NA                                                 | XP_021711703.1sex determination protein fruitless isoform X1                            |
| AAEL0084: pyrroline-5-carboxylate reductase                     | -0.0244846775502534  | 0.865547022236653  | 0.9678896219008   | 330                                       | aag01100 ; aag                                        | XP_001653270.2pyrroline-5-carboxylate reductase                                         |
| AAEL0085: uncharacterized LOC5570785                            | -0.024448913289747   | 0.917277105878546  | 0.97              |                                           |                                                       |                                                                                         |

|                                                                      |                      |                    |                   |               |                                                                                            |                                                                                             |
|----------------------------------------------------------------------|----------------------|--------------------|-------------------|---------------|--------------------------------------------------------------------------------------------|---------------------------------------------------------------------------------------------|
| AAEL0069: repressor of RNA polymerase III transcription MAF1 homolog | -0.0225590469729649  | 0.872725470279068  | 0.969029518523332 | NA            | NA                                                                                         | ETN60775.1 repress XP_021702789.1repressor of RNA polymerase III transcription MAF1 homolog |
| AAEL0065: acetylcholine receptor subunit alpha-like 1                | -0.0225036621015253  | 0.867982230571587  | 0.96863134437578  | NA            | NA                                                                                         | XP_019533063.1 PRE XP_001652011.2acetylcholine receptor subunit alpha-like 1                |
| AAEL0031: uncharacterized LOC577495                                  | -0.0224946497100414  | 0.913729832937815  | 0.977804619455027 | NA            | NA                                                                                         | KXJ77113.1 hypothei AAL76022.1putative serpin                                               |
| AAEL0101: uncharacterized LOC5572962                                 | -0.0224370359335184  | 0.892231585107831  | 0.972555679479065 | NA            | NA                                                                                         | KFB37108.1AGAP003775-like protein                                                           |
| AAEL0183: NA                                                         | -0.022358159942567   | 0.886856082856659  | 0.9709344693273   | NA            | aag03013                                                                                   | XP_021701093.1protein rigor mortis                                                          |
| AAEL0023: plexin-A2                                                  | -0.0223388812720581  | 0.84443378995978   | 0.963198678766584 | NA            | NA                                                                                         | XP_001848140.1 plexi XP_019562811.1 plexin-A2-like                                          |
| AAEL0081: arrestin domain-containing protein 17                      | -0.022292160143316   | 0.852960253171148  | 0.964653958545747 | NA            | NA                                                                                         | KXJ74731.1 hypothei XP_001659007.1arrestin domain-containing protein 17                     |
| AAEL0242: NA                                                         | -0.0222846430029996  | 0.847204602235309  | 0.963198678766584 | NA            | NA                                                                                         | NA XP_021696487.1italin-2 isoform X5                                                        |
| AAEL0045: contactin-associated protein-like 4                        | -0.0222531770442237  | 0.842181757224151  | 0.963198678766584 | NA            | NA                                                                                         | KXJ82550.1 hypothei XP_021696168.1contactin-associated protein-like 4 isoform X3            |
| AAEL0081: putative GTP-binding protein 6                             | -0.022035550298983   | 0.875965270423627  | 0.969652664055335 | NA            | NA                                                                                         | KXJ76584.1 hypothei XP_021709430.1putative GTP-binding protein 6                            |
| AAEL0129: probable ATP-dependent RNA helicase DDX52                  | -0.0221238414096231  | 0.918301719380351  | 0.979657756188126 | NA            | NA                                                                                         | XP_001663141.2probable ATP-dependent RNA helicase DDX52                                     |
| AAEL0196: NA                                                         | -0.0220706386721853  | 0.89448781846013   | 0.972739913152176 | NA            | NA                                                                                         | XP_001658864.2myosin light chain kinase, smooth muscle isoform X1                           |
| AAEL0060: N-alpha-acetyltransferase 15, NatA auxiliary subunit       | -0.0220338860419623  | 0.846269538934842  | 0.963198678766584 | NA            | NA                                                                                         | ETN66349.1 NMDA r XP_021710553.1N-alpha-acetyltransferase 15, NatA auxiliary subunit        |
| AAEL0050: maelectin-A                                                | -0.0219525809975875  | 0.90179934326177   | 0.974443113819573 | NA            | NA                                                                                         | KXJ71843.1 hypothei XP_019546378.1 maelectin-A-like                                         |
| AAEL0135: ribosome biogenesis protein NSA2 homolog                   | -0.0217524676165453  | 0.884720398966213  | 0.970521528629931 | NA            | NA                                                                                         | XP_019555035.1 ribosome biogenesis protein NSA2 homolog                                     |
| AAEL0100: protein TBRG4                                              | -0.0217315934486484  | 0.846854643306274  | 0.963198678766584 | NA            | NA                                                                                         | XP_001654178.2protein TBRG4 isoform X1                                                      |
| AAEL0279: NA                                                         | -0.0216968715265128  | 0.927801676422398  | 0.982649508778163 | NA            | NA                                                                                         | XP_021713418.1sodium-coupled monocarboxylate transporter 1 isoform X2                       |
| AAEL0133: uncharacterized LOC5577691                                 | -0.0216939569439124  | 0.844972615486994  | 0.963198678766584 | NA            | NA                                                                                         | XP_021705925.1uncharacterized protein LOC5577691                                            |
| AAEL0028: tubulin beta-1 chain                                       | -0.0214711281094789  | 0.852680857662961  | 0.964653958545747 | NA            | aag04145                                                                                   | NP_523795.2 beta-Ti XP_001656025.1tubulin beta-1 chain                                      |
| AAEL0146: protein C19orf12 homolog                                   | -0.0214073454137266  | 0.884881072071845  | 0.970521528629931 | NA            | NA                                                                                         | XP_001649261.1protein C19orf12 homolog                                                      |
| AAEL0048: gastrula zinc finger protein 5-1                           | -0.0213786859489691  | 0.906927651596007  | 0.975993693196454 | NA            | NA                                                                                         | KXJ81212.1 hypothei XP_001649967.2gastrula zinc finger protein 5-1                          |
| AAEL0104: NA                                                         | -0.0212292557658406  | 0.954855325266958  | 0.989303184592491 | NA            | NA                                                                                         | XP_001660841.2muscle M-line assembly protein unc-89                                         |
| AAEL0196: NA                                                         | -0.0211991490419345  | 0.911426024852     | 0.976991789015945 | NA            | NA                                                                                         | XP_021703567.1dual specificity tyrosine-phosphorylation-regulated kinase 2 isoform X1       |
| AAEL0112: mitochondrial glutamate carrier 1                          | -0.0211785462381137  | 0.846353566650888  | 0.963198678766584 | NA            | NA                                                                                         | ETN66666.1 mitochxo XP_001661549.2mitochondrial glutamate carrier 1                         |
| AAEL0101: protein fem-1 homolog B                                    | -0.0211509274999473  | 0.862462863084574  | 0.966468488016169 | NA            | NA                                                                                         | XP_001654238.1protein fem-1 homolog B isoform X1                                            |
| AAEL0101: 40S ribosomal protein S2                                   | -0.0210865109380269  | 0.892615731273477  | 0.972739913152176 | NA            | aag03010                                                                                   | XP_001654299.140S ribosomal protein S2                                                      |
| AAEL0078: probable cytochrome P450 4d14                              | -0.0210236737912112  | 0.940163374371404  | 0.985798796572901 | NA            | NA                                                                                         | KXJ70416.1 hypothei XP_001658673.2probable cytochrome P450 4d14 isoform X2                  |
| AAEL0205: NA                                                         | -0.02100150198346004 | 0.9102810740161972 | 0.97691422813284  | NA            | NA                                                                                         | XP_021707848.1transmembrane protein 222                                                     |
| AAEL0036: heterogeneous nuclear ribonucleoprotein M                  | -0.0209321017277165  | 0.842118244620127  | 0.963198678766584 | NA            | NA                                                                                         | CAH05070.1 Hrp59 p XP_001657115.1heterogeneous nuclear ribonucleoprotein M isoform X2       |
| AAEL0007: PRKR-interacting protein 1 homolog                         | -0.0208150561632676  | 0.937539702417099  | 0.984619988774498 | NA            | NA                                                                                         | KXJ77956.1 hypothei XP_001651008.2PRKR-interacting protein 1 homolog                        |
| AAEL0123: membrane-bound transcription factor site-2 protease        | -0.0206641947775317  | 0.925599857261577  | 0.982258702730868 | NA            | aag04141                                                                                   | XP_019552037.1 PRE XP_001662422.2membrane-bound transcription factor site-2 protease        |
| AAEL0107: sphingosine-1-phosphate phosphatase 1                      | -0.0205199135087553  | 0.919629943035653  | 0.97252322736992  | NA            | aag01100; aag                                                                              | KXJ84052.1 hypothei XP_001661054.1sphingosine-1-phosphate phosphatase 1                     |
| AAEL0033: b(0, +)-type amino acid transporter 1                      | -0.0204555942775265  | 0.871146624293415  | 0.969029518523332 | NA            | NA                                                                                         | XP_019527793.1 PRE XP_001656755.2b(0, +)-type amino acid transporter 1 isoform X1           |
| AAEL0016: UDP-N-acetylhexosamine pyrophosphorylase                   | -0.0203687775463882  | 0.89755891719702   | 0.973750254467651 | NA            | aag01100; aag                                                                              | KXJ77610.1 hypothei XP_001659746.2UDP-N-acetylhexosamine pyrophosphorylase                  |
| AAEL0094: uncharacterized LOC5571928                                 | -0.020360380666106   | 0.868467353925553  | 0.96863134437578  | NA            | NA                                                                                         | XP_019539683.1 28S ribosomal protein S27, mitochondrial-like                                |
| AAEL0043: zinc finger MYM-type protein 4                             | -0.0203230810615031  | 0.861639834049448  | 0.96610329632302  | NA            | NA                                                                                         | KXJ69144.1 hypothei XP_001648900.1zinc finger MYM-type protein 4                            |
| AAEL0039: neurotrimin                                                | -0.0201577654214821  | 0.91048915197927   | 0.97691422813284  | NA            | NA                                                                                         | KXJ77644.1 hypothei XP_019552617.1 neurotrimin-like                                         |
| AAEL0195: NA                                                         | -0.0201271560167808  | 0.896224044013877  | 0.973419069671699 | NA            | NA                                                                                         | XP_021703832.1uncharacterized protein LOC5565895 isoform X4                                 |
| AAEL0137: PR domain zinc finger protein 1                            | -0.0198794000194111  | 0.939751758434553  | 0.985798796572901 | NA            | NA                                                                                         | XP_021697776.1PR domain zinc finger protein 1 isoform X1                                    |
| AAEL0038: translationally-controlled tumor protein homolog           | -0.0198647558699906  | 0.890963529869734  | 0.972336404299425 | NA            | NA                                                                                         | ETN66077.1 translati XP_001664282.1translationally-controlled tumor protein homolog         |
| AAEL0111: tRNA:m(4)X modification enzyme TRM13 homolog               | -0.0198267648730309  | 0.919940294656636  | 0.980340877547081 | NA            | NA                                                                                         | KXJ75118.1 hypothei XP_001655179.1tRNA:m(4)X modification enzyme TRM13 homolog              |
| AAEL0057: lysosomal alpha-mannosidase                                | -0.0197842152932425  | 0.86259570659387   | 0.966468488016169 | 511           | aag04142; aag                                                                              | XP_019932137.1 PRE XP_021703511.1lysosomal alpha-mannosidase isoform X2                     |
| AAEL0008: dnal homolog subfamily C member 3                          | -0.0197710076751246  | 0.857584715460535  | 0.964980728578456 | NA            | aag04141                                                                                   | KXJ8782.1 hypothei XP_001651257.2dnal homolog subfamily C member 3                          |
| AAEL0010: solute carrier family 25 member 51                         | -0.0196607675959504  | 0.900767783240199  | 0.974252903274646 | NA            | NA                                                                                         | KFB46839.1 AGAP00 XP_001657866.1solute carrier family 25 member 51                          |
| AAEL0217: NA                                                         | -0.01962976658608    | 0.888268689778689  | 0.970996236837524 | NA            | NA                                                                                         | XP_021700536.1 rho GTPase-activating protein conundrum                                      |
| AAEL0041: phagocyte signaling-impaired protein                       | -0.0196010821162619  | 0.904119026785015  | 0.9756893731061   | NA            | NA                                                                                         | Q17DK2.2 RecName: XP_021709566.1phagocyte signaling-impaired protein                        |
| AAEL0062: dehydrogenase/reductase SDR family member 4                | -0.0195895727036815  | 0.886643804445478  | 0.9709344693273   | aag01100; aag | KXJ81809.1 hypothei XP_001657588.2dehydrogenase/reductase SDR family member 4              |                                                                                             |
| AAEL0107: zinc finger protein 664                                    | -0.0195654054035618  | 0.932100531828731  | 0.98347583693566  | NA            | NA                                                                                         | KXJ76411.1 hypothei XP_021702977.1zinc finger protein 664                                   |
| AAEL0036: inhibitor of growth protein 1                              | -0.0194966510832606  | 0.922277293629489  | 0.981343310857761 | NA            | NA                                                                                         | KXJ73146.1 hypothei XP_021705140.1inhibitor of growth protein 1                             |
| AAEL0096: probable 28S ribosomal protein S16, mitochondrial          | -0.0194806931951457  | 0.899575129665013  | 0.97393667311859  | NA            | aag03010                                                                                   | XP_001653853.2probable 28S ribosomal protein S16, mitochondrial isoform X1                  |
| AAEL0014: ubiquinone biosynthesis monooxygenase COQ6, mitochondrial  | -0.0194204202107657  | 0.903823274714912  | 0.975599035064706 | aag01100; aag | XP_019541459.1 PRE XP_021694709.1ubiquinone biosynthesis monooxygenase COQ6, mitochondrial |                                                                                             |
| AAEL0009: ER membrane protein complex subunit 4                      | -0.0194094703955414  | 0.899637222506848  | 0.97393667311859  | NA            | NA                                                                                         | XP_001847576.1 tra; XP_001657468.1ER membrane protein complex subunit 4 isoform X2          |
| AAEL0027: anaphase-promoting complex subunit 5                       | -0.0192573193582784  | 0.949874082860946  | 0.98806088919239  | NA            | aag04120                                                                                   | KXJ70237.1 hypothei XP_021697300.1anaphase-promoting complex subunit 5                      |
| AAEL0123: uncharacterized LOC5576178                                 | -0.0192393270901434  | 0.961093014260681  | 0.989923653148286 | NA            | NA                                                                                         | KXJ71885.1 hypothei XP_001655981.1uncharacterized protein LOC5576178                        |
| AAEL0087: conserved oligomeric Golgi complex subunit 8               | -0.0192171516149048  | 0.905336233142823  | 0.975993693196454 | NA            | NA                                                                                         | KXJ73537.1 hypothei XP_001653443.2conserved oligomeric Golgi complex subunit 8              |
| AAEL0070: mRNA export factor                                         | -0.0190146775298015  | 0.915363808853822  | 0.978301715339473 | NA            | aag03013                                                                                   | KFB49976.1 hypothe XP_001652531.1mRNA export factor                                         |
| AAEL0051: adenylate cyclase type 2                                   | -0.0190118921311308  | 0.9204678528588    |                   |               |                                                                                            |                                                                                             |

|                        |                                                                   |                     |                   |                   |                         |                |                                                                                                           |
|------------------------|-------------------------------------------------------------------|---------------------|-------------------|-------------------|-------------------------|----------------|-----------------------------------------------------------------------------------------------------------|
| AAEL0130 <sup>4</sup>  | uncharacterized LOC5577164                                        | -0.0175733341409574 | 0.954799069754688 | 0.989303184592491 | NA                      | NA             | XP_001663251.1uncharacterized protein LOC5577164                                                          |
| AAEL00081 <sup>c</sup> | protein purity of essence                                         | -0.0175702296928853 | 0.879335963172982 | 0.969652664055335 | NA                      | NA             | KXJ72043.1 hypothei XP_021706331.1protein purity of essence                                               |
| AAEL0069 <sup>c</sup>  | NA                                                                | -0.0175065071515051 | 0.902201533420929 | 0.974554188590838 | NA                      | NA             | KXJ73726.1 hypothei XP_001658076.1uncharacterized protein LOC5568497                                      |
| AAEL0063 <sup>c</sup>  | serine protease HTRA2, mitochondrial                              | -0.0174998461541586 | 0.935349669610493 | 0.984004534098063 | NA                      | aag04214 ; aag | KXJ71478.1 hypothei XP_001651967.2serine protease HTRA2, mitochondrial                                    |
| AAEL0019 <sup>c</sup>  | sorting nexin-16                                                  | -0.0174396167180114 | 0.912464128322124 | 0.977354318220583 | NA                      | NA             | KXJ71947.1 hypothei XP_001654339.2sorting nexin-16                                                        |
| AAEL0015 <sup>c</sup>  | kinesin-like protein KIF13A                                       | -0.0173675925546616 | 0.919954785048762 | 0.980340877547081 | NA                      | NA             | XP_019537630.1 PRE XP_021695842.1kinesin-like protein KIF13A isoform X2                                   |
| AAEL0130 <sup>c</sup>  | mediator of RNA polymerase II transcription subunit 16            | -0.0173626401374676 | 0.951504863957341 | 0.988479552477666 | NA                      | NA             | XP_001663311.2mediator of RNA polymerase II transcription subunit 16                                      |
| AAEL0057 <sup>c</sup>  | probable N-acetyltransferase san                                  | -0.0173130704994013 | 0.874293558562772 | 0.969652664055335 | NA                      | NA             | KXJ69210.1 hypothei XP_001651349.2 probable N-acetyltransferase san                                       |
| AAEL0109 <sup>c</sup>  | queuine tRNA-ribosyltransferase accessory subunit 2               | -0.0172766365427025 | 0.93931912290652  | 0.985701285093602 | NA                      | NA             | KXJ82951.1 hypothei XP_001655069.1queuine tRNA-ribosyltransferase accessory subunit 2                     |
| AAEL0132 <sup>c</sup>  | cysteine proteinase inhibitor 1                                   | -0.017102972812072  | 0.926088565671563 | 0.982258702730868 | NA                      | NA             | XP_021694027.1cysteine proteinase inhibitor 1                                                             |
| AAEL0043 <sup>c</sup>  | short coiled-coil protein homolog                                 | -0.0170319116242591 | 0.905198195283907 | 0.975993693196454 | NA                      | NA             | ETN59713.1 short co XP_001648899.1short coiled-coil protein homolog                                       |
| AAEL02201 <sup>c</sup> | NA                                                                | -0.0169858622142178 | 0.916002547767643 | 0.978630706287391 | NA                      | NA             | NA                                                                                                        |
| AAEL0156 <sup>c</sup>  | mono [ADP-ribose] polymerase PARP16                               | -0.0169366705047833 | 0.950926386182512 | 0.988386462829441 | NA                      | NA             | XP_001647568.1mono [ADP-ribose] polymerase PARP16                                                         |
| AAEL0149 <sup>c</sup>  | cytochrome c oxidase subunit 5A, mitochondrial                    | -0.0168081226498501 | 0.98902577754301  | 0.973750254467651 | NA                      | aag01100 ; aag | XP_001650058.1cytochrome c oxidase subunit 5A, mitochondrial                                              |
| AAEL0057 <sup>c</sup>  | NA                                                                | -0.01680234894292   | 0.91421698963581  | 0.977828474226146 | NA                      | NA             | KXJ80705.1 hypothei XP_001651441.2uncharacterized protein LOC5567042                                      |
| AAEL0198 <sup>c</sup>  | NA                                                                | -0.0167894384158937 | 0.94007003221799  | 0.985798796572901 | NA                      | NA             | XP_019548739.1 double-stranded RNA-binding protein Staufen homolog 2                                      |
| AAEL0054 <sup>c</sup>  | uncharacterized LOC5566544                                        | -0.0167202318324686 | 0.879982022393852 | 0.969652664055335 | NA                      | NA             | KFB40414.1 AGAP01 KFB40414.1AGAP011317-like protein                                                       |
| AAEL0229 <sup>c</sup>  | NA                                                                | -0.0166717886750706 | 0.958940152115388 | 0.989441920233345 | NA                      | NA             | NA                                                                                                        |
| AAEL00181 <sup>c</sup> | uncharacterized LOC5572454                                        | -0.0166382205177557 | 0.900391156756164 | 0.974065297962641 | NA                      | NA             | KXJ72738.1 hypothei XP_019550432.1 tyrosine-protein phosphatase non-receptor type 13-like isoform X2      |
| AAEL0114 <sup>c</sup>  | general transcription factor IIE subunit 2                        | -0.0166075134640474 | 0.942563346688587 | 0.986630408149377 | NA                      | aag03022       | KXJ75165.1 hypothei XP_001661672.2general transcription factor IIE subunit 2                              |
| AAEL0228 <sup>c</sup>  | NA                                                                | -0.0164095397969155 | 0.879587866240916 | 0.969652664055335 | 00561 ; 00564           | aag01100 ; aag | XP_021698645.11-acyl-sn-glycerol-3-phosphate acyltransferase delta                                        |
| AAEL0062 <sup>c</sup>  | UDP-glucuronic acid decarboxylase 1                               | -0.0163489750290265 | 0.927160074938275 | 0.982472473084084 | NA                      | aag01100 ; aag | KFB51950.1 AGAP00 XP_021705060.1UDP-glucuronic acid decarboxylase 1                                       |
| AAEL0135 <sup>c</sup>  | cullin-1                                                          | -0.016182789552666  | 0.884746813818067 | 0.970521528629931 | NA                      | aag04141 ; aag | XP_019565215.1 cullin-1-like                                                                              |
| AAEL0124 <sup>c</sup>  | RING finger protein unkempt                                       | -0.0161184745055556 | 0.909343985382735 | 0.97691422813284  | NA                      | NA             | XP_019551932.1 PRE XP_021702704.1RING finger protein unkempt isoform X4                                   |
| AAEL0123 <sup>c</sup>  | lipase 3                                                          | -0.0161064001595671 | 0.9962434231062   | 0.999035469616496 | NA                      | NA             | KXJ71264.1 hypothei XP_001662497.2lipase 3                                                                |
| AAEL0205 <sup>c</sup>  | NA                                                                | -0.0160729476444296 | 0.957215732087386 | 0.989441920233345 | NA                      | NA             | XP_021699670.1origin recognition complex subunit 2                                                        |
| AAEL0046 <sup>c</sup>  | succinate-semialdehyde dehydrogenase [NADP(+)] GabD               | -0.0160321054750326 | 0.891198295739694 | 0.972336404299425 | NA                      | aag01100 ; aag | KXJ81994.1 hypothei XP_001649617.2uncharacterized protein LOC5565255                                      |
| AAEL0044 <sup>c</sup>  | tubulin-specific chaperone cofactor E-like protein                | -0.0159709520470192 | 0.888121943110281 | 0.970996238637524 | NA                      | NA             | KXJ82969.1 hypothei XP_021707615.1tubulin-specific chaperone cofactor E-like protein isoform X1           |
| AAEL0105 <sup>c</sup>  | ELAV-like protein 2                                               | -0.0159546613110367 | 0.9147768943537   | 0.977901601050505 | NA                      | NA             | ETN63955.1 ELAV pri XP_019526635.1 ELAV-like protein 2                                                    |
| AAEL0194 <sup>c</sup>  | NA                                                                | -0.0158649188122563 | 0.909550306598076 | 0.97691422813284  | NA                      | aag04140 ; aag | XP_021710693.1protein similar isoform X2                                                                  |
| AAEL0250 <sup>c</sup>  | NA                                                                | -0.0158139869819184 | 0.884134332663659 | 0.970521528629931 | NA                      | aag04130       | XP_021695759.1syntaxin-1A isoform X1                                                                      |
| AAEL0013 <sup>c</sup>  | transmembrane protein 256 homolog                                 | -0.015778762064894  | 0.90354516537468  | 0.975494447471861 | NA                      | NA             | XP_001238550.1 AG_ XP_001653054.1transmembrane protein 256 homolog                                        |
| AAEL0054 <sup>c</sup>  | polycomb protein Sfmfbt                                           | -0.0157144430658931 | 0.918609487857163 | 0.979722358282524 | NA                      | NA             | KFB48142.1 AGAP01 XP_021701152.1polycomb protein Sfmfbt                                                   |
| AAEL0079 <sup>c</sup>  | zinc finger protein 791                                           | -0.0156121449542309 | 0.943306134537332 | 0.98718333334758  | NA                      | NA             | KXJ71222.1 hypothei XP_021703442.1zinc finger protein 791                                                 |
| AAEL0044 <sup>c</sup>  | 1-phosphatidylinositol 4,5-bisphosphate phosphodiesterase gamma-1 | -0.0156028281445501 | 0.91305518355785  | 0.977561298149576 | 00562 ; 04070           | aag01100 ; aag | XP_001849443.1 1-p XP_021710614.11-phosphatidylinositol 4,5-bisphosphate phosphodiesterase gamma-1        |
| AAEL0068 <sup>c</sup>  | ras-related protein Rab-32                                        | -0.0155713393016639 | 0.905480454486208 | 0.975993693196454 | NA                      | NA             | ETN63559.1 hypothei XP_011493357.2serine-rich adhesin for platelets isoform X1                            |
| AAEL0136 <sup>c</sup>  | zinc finger protein 436                                           | -0.0155498300233663 | 0.952982810027412 | 0.989291842952044 | NA                      | NA             | XP_001663856.2zinc finger protein 436                                                                     |
| AAEL0088 <sup>c</sup>  | xaa-Pro dipeptidase                                               | -0.0155365005172302 | 0.900197398104356 | 0.974065297962641 | NA                      | NA             | XP_001865452.1 xaa XP_021708173.1xaa dipeptidase                                                          |
| AAEL0136 <sup>c</sup>  | eukaryotic translation initiation factor 2 subunit 1              | -0.0154770987830304 | 0.88837397664522  | 0.970996238637524 | NA                      | aag03013 ; aag | XP_001663853.2eukaryotic translation initiation factor 2 subunit 1                                        |
| AAEL0012 <sup>c</sup>  | uncharacterized LOC5580229                                        | -0.0154113786177522 | 0.904404946277667 | 0.97576960286471  | NA                      | NA             | XP_001863665.1 con XP_021708204.1uncharacterized protein LOC5580229                                       |
| AAEL0046 <sup>c</sup>  | actin                                                             | -0.0153707016803383 | 0.971968563099895 | 0.992802528468446 | NA                      | NA             | KXJ82456.1 hypothei XP_019532457.1 actin-like                                                             |
| AAEL0069 <sup>c</sup>  | uncharacterized protein T28D9.3                                   | -0.0153448143077841 | 0.917737472840313 | 0.979587080973985 | NA                      | NA             | XP_019559027.1 PRE XP_021700321.1putative phosphatidate phosphatase isoform X1                            |
| AAEL0197 <sup>c</sup>  | NA                                                                | -0.015335794533804  | 0.958101416005025 | 0.989441920233345 | NA                      | aag04150 ; aag | XP_019558143.1 frizzled-like                                                                              |
| AAEL0022 <sup>c</sup>  | leucine-rich repeat neuronal protein 3                            | -0.0153195575229205 | 0.896913247715384 | 0.973750254467651 | NA                      | NA             | KXJ81202.1 hypothei XP_001661261.1leucine-rich repeat neuronal protein 3                                  |
| AAEL00041 <sup>c</sup> | iron-sulfur cluster assembly 1 homolog, mitochondrial             | -0.0152921314689132 | 0.905594891289655 | 0.975993693196454 | NA                      | NA             | ETN63311.1 hypothei XP_001656446.1iron-sulfur cluster assembly 1 homolog, mitochondrial                   |
| AAEL0084 <sup>c</sup>  | isochorismatase domain-containing protein 1                       | -0.0152765549519533 | 0.924102704446585 | 0.981740109661555 | NA                      | NA             | KFB41223.1 AGAP00 XP_001653279.1isochorismatase domain-containing protein 1                               |
| AAEL0003 <sup>c</sup>  | mitochondrial inner membrane protease ATP23 homolog               | -0.0152740005326764 | 0.943968198806655 | 0.987296271832165 | NA                      | NA             | KXJ72748.1 hypothei XP_001655524.2mitochondrial inner membrane protease ATP23 homolog                     |
| AAEL0020 <sup>c</sup>  | ubiquitin thioesterase trabid                                     | -0.0152461017321289 | 0.906329455468783 | 0.975993693196454 | NA                      | NA             | XP_019560493.1 PRE XP_021711487.1ubiquitin thioesterase trabid isoform X1                                 |
| AAEL0033 <sup>c</sup>  | chaoptin                                                          | -0.015111507016817  | 0.964480004400084 | 0.991092399652587 | NA                      | NA             | KXJ76711.1 hypothei XP_019558700.1 insulin-like growth factor-binding protein complex acid labile subunit |
| AAEL0105 <sup>c</sup>  | amphiphysin                                                       | -0.0150711161949635 | 0.911894813128468 | 0.977278855888727 | NA                      | aag04144       | XP_021697186.1amphiphysin isoform X3                                                                      |
| AAEL0037 <sup>c</sup>  | NA                                                                | -0.0150526721829571 | 0.933923429157899 | 0.98347583693566  | NA                      | NA             | KXJ8853.1 hypothei XP_001664181.2uncharacterized protein LOC5579002                                       |
| AAEL0027 <sup>c</sup>  | 28S ribosomal protein S22, mitochondrial                          | -0.0150306907816009 | 0.907052604239956 | 0.975993693196454 | NA                      | NA             | KXJ68747.1 hypothei XP_001662176.128S ribosomal protein S22, mitochondrial                                |
| AAEL0045 <sup>c</sup>  | beta-galactosidase                                                | -0.014921568129489  | 0.93420749700255  | 0.98347583693566  | 00531 ; 00600 ; 00604 ; | aag01100 ; aag | XP_019541280.1 PRE XP_001649402.2beta-galactosidase isoform X1                                            |
| AAEL0186 <sup>c</sup>  | NA                                                                | -0.0                |                   |                   |                         |                |                                                                                                           |

|                                                                                                         |                      |                    |                   |                     |               |                                                                   |                                                                                                             |                                                        |
|---------------------------------------------------------------------------------------------------------|----------------------|--------------------|-------------------|---------------------|---------------|-------------------------------------------------------------------|-------------------------------------------------------------------------------------------------------------|--------------------------------------------------------|
| AAEL0094: protein peste                                                                                 | -0.013330886929196   | 0.904848970717734  | 0.975993693196454 | NA                  | NA            | NA                                                                | XP_001660042.3protein peste                                                                                 |                                                        |
| AAEL0202: NA                                                                                            | -0.0132497867322856  | 0.930907488475868  | 0.98347583693566  | NA                  | aag03010      | NA                                                                | XP_001653087.240S ribosomal protein 5A                                                                      |                                                        |
| AAEL0216: NA                                                                                            | -0.0132176708386301  | 0.925729310015305  | 0.982258702730868 | NA                  | NA            | NA                                                                | XP_021693310.1saccharopine dehydrogenase-like oxidoreductase                                                |                                                        |
| AAEL0181: NA                                                                                            | -0.01318785753650892 | 0.9043675352323224 | 0.97576960286471  | NA                  | NA            | NA                                                                | AAAX20152.1AMPK-gamma subunit                                                                               |                                                        |
| AAEL0263: NA                                                                                            | -0.0130406774367836  | 0.930718790076459  | 0.98347583693566  | NA                  | NA            | NA                                                                | XP_021706289.1host cell factor isoform X2                                                                   |                                                        |
| AAEL0068: RNA polymerase II degradation factor 1                                                        | -0.0130130098912722  | 0.922115459079536  | 0.980608390982715 | NA                  | NA            | KXJ73954.1 hypothei                                               | XP_001652307.1RNA polymerase II degradation factor 1 isoform X2                                             |                                                        |
| AAEL0003: O-acetyl-ADP-ribose deacetylase 1                                                             | -0.0129936802091378  | 0.95467230814264   | 0.989303184592491 | NA                  | NA            | XP_019528773.1 PRE                                                | XP_021697898.1O-acetyl-ADP-ribose deacetylase 1 isoform X1                                                  |                                                        |
| AAEL0101: calcium uptake protein 1 homolog, mitochondrial                                               | -0.0128116681015231  | 0.92017426566712   | 0.980340877547081 | NA                  | NA            | NA                                                                | XP_001660642.1calcium uptake protein 1 homolog, mitochondrial isoform X2                                    |                                                        |
| AAEL0279: NA                                                                                            | -0.0128006097184295  | 0.973463653411974  | 0.993357763885677 | NA                  | NA            | NA                                                                | XP_021703439.1zinc finger protein 432-like                                                                  |                                                        |
| AAEL0004: mitochondrial proton/calcium exchanger protein                                                | -0.0126400857011062  | 0.910668360022115  | 0.9769142813284   | NA                  | NA            | XP_019532118.1 PRE                                                | XP_001656963.1mitochondrial proton/calcium exchanger protein isoform X1                                     |                                                        |
| AAEL0044: importin-9                                                                                    | -0.0126121047345961  | 0.923151770554363  | 0.981343310857761 | NA                  | NA            | XP_019541175.1 PRE                                                | XP_001649140.1importin-9 isoform X2                                                                         |                                                        |
| AAEL0278: NA                                                                                            | -0.012497830241662   | 0.93153627236162   | 0.98347583693566  | NA                  | NA            | NA                                                                | XP_019529228.1 serine-rich adhesin for platelets-like isoform X3                                            |                                                        |
| AAEL0002: protein stoned-A                                                                              | -0.0124454958973816  | 0.956870653823086  | 0.989441920233345 | NA                  | NA            | KXJ77547.1 hypothei                                               | XP_001660127.1protein stoned-A                                                                              |                                                        |
| AAEL0264: NA                                                                                            | -0.0123441411019024  | 0.924729729690665  | 0.982151774309037 | NA                  | NA            | NA                                                                | NA                                                                                                          |                                                        |
| AAEL0205: NA                                                                                            | -0.0122757703985189  | 0.9485068989334032 | 0.987907336259396 | NA                  | NA            | NA                                                                | NA                                                                                                          |                                                        |
| AAEL0049: ATP-dependent RNA helicase vasa                                                               | -0.0122224455998216  | 0.915832620895114  | 0.978575450241157 | NA                  | NA            | NA                                                                | KXJ83213.1 hypothei                                                                                         | XP_001650127.1ATP-dependent RNA helicase vasa          |
| AAEL0109: SWI/SNF-related matrix-associated actin-dependent regulator of chromatin subfamily E member 1 | -0.0121501298604535  | 0.947587380415425  | 0.987743607411212 | NA                  | NA            | KXJ75138.1 hypothei                                               | XP_001661139.1SWI/SNF-related matrix-associated actin-dependent regulator of chromatin subfamily E member 1 |                                                        |
| AAEL0086: 39S ribosomal protein L28, mitochondrial                                                      | -0.0121002277529296  | 0.936238278607133  | 0.98424319806035  | NA                  | aag03010      | NA                                                                | KXJ68532.1 hypothei                                                                                         | XP_001653335.139S ribosomal protein L28, mitochondrial |
| AAEL0065: NA                                                                                            | -0.0120115897826252  | 0.930929663572128  | 0.98347583693566  | NA                  | NA            | XP_019553295.1 PRE                                                | XP_001652075.2venom protease                                                                                |                                                        |
| AAEL0078: putative Dol-P-Glc:Glc(2)Man(9)GlcNAc(2)-PP-Dol alpha-1,2-glucosyltransferase                 | -0.0115720482832392  | 0.951956726152693  | 0.988479552477666 | 510                 | aag01100; aag | KXJ78683.1 hypothei                                               | XP_001652924.1putative DolGlc:Glc(2)Man(9)GlcNAc(2)-Dol alpha-1,2-glucosyltransferase                       |                                                        |
| AAEL0072: splicing factor 45                                                                            | -0.0115718285714302  | 0.950753997884959  | 0.988345943124042 | NA                  | aag03040      | KF845880.1 AGAP00                                                 | XP_001658243.1splicing factor 45                                                                            |                                                        |
| AAEL0015: glycerol-3-phosphate dehydrogenase [NAD(+)], cytoplasmic                                      | -0.0114964101953994  | 0.944999919797062  | 0.987398325447749 | 00564; 00564        | aag00564      | XP_001653595.1 glyx                                               | XP_001653595.1glycerol-3-phosphate dehydrogenase [NAD(+)], cytoplasmic isoform X3                           |                                                        |
| AAEL0116: uncharacterized LOC5575079                                                                    | -0.0113756337260398  | 0.959326395126588  | 0.989441920233345 | NA                  | NA            | KXJ68119.1 hypothei                                               | XP_001661807.2uncharacterized protein LOC5575079                                                            |                                                        |
| AAEL0136: calcium and integrin-binding family member 2                                                  | -0.0113555357734327  | 0.930040448623584  | 0.98347583693566  | NA                  | NA            | XP_021697643.1calcium and integrin-binding family member 2        | XP_021697643.1calcium and integrin-binding family member 2                                                  |                                                        |
| AAEL0247: NA                                                                                            | -0.0113431661939817  | 0.931217172923036  | 0.98347583693566  | NA                  | aag03008; aag | NA                                                                | XP_021712980.15'-3' exoribonuclease 2 homolog                                                               |                                                        |
| AAEL0236: NA                                                                                            | -0.0112939298756286  | 0.931961001545188  | 0.98347583693566  | 00670; 00720        | aag01100; aag | NA                                                                | XP_019525707.1 methylenetetrahydrofolate reductase-like                                                     |                                                        |
| AAEL0169: uncharacterized LOC23687380                                                                   | -0.0112251555035099  | 0.954005084470974  | 0.989303184592491 | NA                  | NA            | XP_001844120.1elongation factor 1-alpha                           | XP_001844120.1elongation factor 1-alpha                                                                     |                                                        |
| AAEL0022: sugar transporter ERD6-like 1                                                                 | -0.0111310119372817  | 0.959346666487     | 0.989441920233345 | NA                  | NA            | KXJ70121.1 hypothei                                               | XP_001661245.1sugar transporter ERD6-like 1                                                                 |                                                        |
| AAEL0122: protein max                                                                                   | -0.0110274488839907  | 0.919564683891459  | 0.980340877547081 | NA                  | NA            | ETN66963.1 bhlhzip 1                                              | XP_001662341.2protein max                                                                                   |                                                        |
| AAEL0046: cell growth regulator with RING finger domain protein 1                                       | -0.0109781858752441  | 0.944157301893298  | 0.987296271832165 | NA                  | NA            | XP_019549511.1 PRE                                                | XP_021707898.1cell growth regulator with RING finger domain protein 1 isoform X1                            |                                                        |
| AAEL0071: facilitated trehalose transporter Tret1                                                       | -0.0109587869728339  | 0.929266580831965  | 0.983225373900855 | NA                  | NA            | XP_019533127.1 PRE                                                | XP_001658148.2facilitated trehalose transporter Tret1                                                       |                                                        |
| AAEL0099: apyrase-like                                                                                  | -0.0108466671913612  | 0.959450796200167  | 0.989441920233345 | NA                  | NA            | XP_019547523.1 apyrase                                            | XP_019547523.1 apyrase                                                                                      |                                                        |
| AAEL0116: 39S ribosomal protein L41, mitochondrial                                                      | -0.0105820675193601  | 0.957137681048369  | 0.989441920233345 | NA                  | NA            | ETN59694.1 39S ribo                                               | XP_001661823.139S ribosomal protein L41, mitochondrial                                                      |                                                        |
| AAEL0148: putative tyrosine-protein kinase Wsck                                                         | -0.0105430717388735  | 0.983530076917832  | 0.995648379295697 | NA                  | NA            | XP_001649753.1putative tyrosine-protein kinase Wsck               | XP_001649753.1putative tyrosine-protein kinase Wsck                                                         |                                                        |
| AAEL0039: translation factor GUF1 homolog, mitochondrial                                                | -0.0105340181975618  | 0.963539869983882  | 0.990998530286399 | NA                  | NA            | KXJ75822.1 hypothei                                               | XP_001648056.1translation factor GUF1 homolog, mitochondrial                                                |                                                        |
| AAEL0117: diacylglycerol kinase epsilon                                                                 | -0.0105317507884976  | 0.962102155511147  | 0.990224178616807 | 00564; 04070; 00561 | aag01100; aag | KXJ82264.1 hypothei                                               | XP_021697543.1diacylglycerol kinase epsilon                                                                 |                                                        |
| AAEL0050: RNA-binding protein 39                                                                        | -0.0104630752232042  | 0.936319085039199  | 0.98424319806035  | NA                  | NA            | XP_001869868.1 spli                                               | XP_021703642.1RNA-binding protein 39                                                                        |                                                        |
| AAEL0047: dipeptidyl aminopeptidase-like protein 6                                                      | -0.0104244597616566  | 0.957977475938185  | 0.989441920233345 | NA                  | NA            | XP_021712707.1dipeptidyl aminopeptidase-like protein 6 isoform X4 | XP_021712707.1dipeptidyl aminopeptidase-like protein 6 isoform X4                                           |                                                        |
| AAEL0120: muskelin                                                                                      | -0.0104092999274963  | 0.955420318568369  | 0.989441920233345 | NA                  | NA            | XP_019541671.1 PRE                                                | XP_001662154.1muskelin isoform X3                                                                           |                                                        |
| AAEL0110: uncharacterized LOC5574236                                                                    | -0.010357079462614   | 0.964362487752957  | 0.991092399652587 | NA                  | NA            | XP_001849205.1 con                                                | EAT36959.1AAEL011004                                                                                        |                                                        |
| AAEL0096: serine-aspartate repeat-containing protein C                                                  | -0.0103129817623917  | 0.928642759340345  | 0.98291452348119  | NA                  | NA            | XP_019525870.1 protein starmarker isoform X1                      | XP_019525870.1 protein starmarker isoform X1                                                                |                                                        |
| AAEL0116: 40S ribosomal protein S15                                                                     | -0.0103070787587085  | 0.943075074703145  | 0.987053780416098 | NA                  | aag03010      | KXJ82298.1 hypothei                                               | XP_001661827.140S ribosomal protein S15                                                                     |                                                        |
| AAEL0044: transketolase-like protein 2                                                                  | -0.0102750184785527  | 0.93356116368116   | 0.98347583693566  | 00900; 00730        | aag01100; aag | ETN59360.1 transket                                               | XP_001649141.1transketolase-like protein 2                                                                  |                                                        |
| AAEL0224: NA                                                                                            | -0.0102624188940011  | 0.950053769965574  | 0.98806088919239  | NA                  | NA            | XP_021703658.1transcription factor YY2-like                       | XP_021703658.1transcription factor YY2-like                                                                 |                                                        |
| AAEL0031: 39S ribosomal protein L21, mitochondrial                                                      | -0.0101957266793751  | 0.945306778466983  | 0.987398325447749 | NA                  | aag03010      | KXJ68599.1 hypothei                                               | XP_001656350.239S ribosomal protein L21, mitochondrial                                                      |                                                        |
| AAEL0020: tetratricopeptide repeat protein 19 homolog, mitochondrial                                    | -0.0101128374672279  | 0.956308645633598  | 0.989441920233345 | NA                  | NA            | KXJ82916.1 hypothei                                               | XP_001660810.2tetratricopeptide repeat protein 19 homolog, mitochondrial                                    |                                                        |
| AAEL0241: NA                                                                                            | -0.00997451623820332 | 0.951898538244393  | 0.988479552477666 | NA                  | NA            | XP_021697221.1protein FAM46C isoform X3                           | XP_021697221.1protein FAM46C isoform X3                                                                     |                                                        |
| AAEL0245: NA                                                                                            | -0.00997337049454303 | 0.930233813142392  | 0.98347583693566  | NA                  | NA            | ---NA---                                                          | ---NA---                                                                                                    |                                                        |
| AAEL0050: 60S ribosomal protein L13                                                                     | -0.00996524925447106 | 0.940839304982462  | 0.986042559017697 | NA                  | aag03010      | CRJ03320.1 CLUMA_                                                 | XP_021705544.160S ribosomal protein L13                                                                     |                                                        |
| AAEL0042: protein drumstick                                                                             | -0.00994804826321629 | 0.971939231015396  | 0.992802528468446 | NA                  | NA            | KXJ80325.1 hypothei                                               | XP_01955922.1 protein drumstick-like                                                                        |                                                        |
| AAEL0112: elongation factor 1-gamma                                                                     | -0.00994246825039335 | 0.941204647962574  | 0.986042559017697 | NA                  | NA            | KXJ69323.1 hypothei                                               | XP_001661570.1elongation factor 1-gamma                                                                     |                                                        |
| AAEL0029: 26S proteasome non-ATPase regulatory subunit 1                                                | -0.00989931697309596 | 0.936345531384613  | 0.98424319806035  | NA                  | aag03050      | KXJ67908.1 hypothei                                               | XP_001662672.226S proteasome non-ATPase regulatory subunit 1                                                |                                                        |
| AAEL0023: UPF0389 protein CG9231                                                                        | -0.00986462408517295 | 0.933809575340806  | 0.98347583693566  | NA                  | NA            | XP_001845741.1 gro                                                | XP_021698908.1UPF0389 protein CG9231                                                                        |                                                        |
| AAEL0110: lysophospholipid acyltransferase 1                                                            | -0.00980276109261756 | 0.927940477306833  | 0.982649508778163 | NA                  | NA            | XP_019549480.1 PRE                                                | XP_021696709.1lysophospholipid acyltransferase 1 isoform X1                                                 |                                                        |
| AAEL0068: 14-3-3 protein zeta                                                                           | -0.00968923877967733 | 0.93732598202982   | 0.984619988774498 | NA                  | aag04013; aag | AHJ25930.1 14-3-3 zeta                                            | XP_001652301.114-3-3 protein zeta isoform X1                                                                |                                                        |
| AAEL0044: poly(U)-binding-splicing factor half pint                                                     | -0.00957197767642286 | 0.950106412952697  | 0.98806088919239  | NA                  | aag03040      | XP_019542113.1 PRE                                                | XP_001649078.2poly(U)-binding-splicing factor half pint isoform X1                                          |                                                        |
| AAEL0002: scavenger receptor class B member 1                                                           | -0.00954753972507401 | 0.93               |                   |                     |               |                                                                   |                                                                                                             |                                                        |

|                                                                         |                       |                   |                   |               |                                                                                        |                                                                                               |
|-------------------------------------------------------------------------|-----------------------|-------------------|-------------------|---------------|----------------------------------------------------------------------------------------|-----------------------------------------------------------------------------------------------|
| AAEL0080f integrator complex subunit 3 homolog                          | -0.00764135113780706  | 0.954181879179771 | 0.989303184592491 | NA            | NA                                                                                     | XP_015031969.2 intg XP_021700011.integrator complex subunit 3 homolog                         |
| AAEL0001f RUN domain-containing protein 1                               | -0.00761941629440588  | 0.985682889851758 | 0.995754644700487 | NA            | NA                                                                                     | KXJ83438.1 hypothei XP_001657703.1RUN domain-containing protein 1                             |
| AAEL0039f RNA polymerase-associated protein Rtf1                        | -0.00749423708662974  | 0.945428640888416 | 0.987398325447749 | NA            | NA                                                                                     | KXJ77757.1 hypothei XP_001648109.1RNA polymerase-associated protein Rtf1                      |
| AAEL0061f acyl-CoA-binding domain-containing protein 5                  | -0.00733846849837678  | 0.953489387781241 | 0.989303184592491 | NA            | NA                                                                                     | KXJ82281.1 hypothei XP_001657570.1acyl-CoA-binding domain-containing protein 5                |
| AAEL0253f NA                                                            | -0.00731968768720162  | 0.953061528773079 | 0.989291842952044 | NA            | NA                                                                                     | XP_021694729.1NADPH--cytochrome P450 reductase isoform X1                                     |
| AAEL0199f NA                                                            | -0.0072682047465344   | 0.966629477982344 | 0.991210985301503 | NA            | NA                                                                                     | XP_019530132.1 uncharacterized threonine-rich GPI-anchored glycoprotein PJ4664.02-like        |
| AAEL0058f synaptic vesicle glycoprotein 2C                              | -0.007266135112280156 | 0.959454583044755 | 0.989441920233345 | NA            | aag04512                                                                               | ETN67247.1 synaptic XP_001651533.1synaptic vesicle glycoprotein 2C                            |
| AAEL0019f uncharacterized LOC5573003                                    | -0.00724506580107927  | 0.993196385731787 | 0.999035469616496 | NA            | NA                                                                                     | XP_001862863.1 con XP_001654330.2uncharacterized protein LOC5573003                           |
| AAEL0002f serine protease snake                                         | -0.0071867897099004   | 0.97580391691292  | 0.994190331004269 | NA            | NA                                                                                     | XP_001660122.1serine protease snake                                                           |
| AAEL0149f GDP-mannose 4,6 dehydratase                                   | -0.00717135956797725  | 0.977796896330195 | 0.994190331004269 | 00051 ; 00520 | aag01100 ; aag NA                                                                      | XP_001650108.2GDP-mannose 4,6 dehydratase                                                     |
| AAEL0056f serine incorporator 1                                         | -0.00717059374789836  | 0.945538260476332 | 0.987398325447749 | NA            | NA                                                                                     | ETN58148.1 membra XP_001651350.1serine incorporator 1 isoform X2                              |
| AAEL0056f RING finger and CHY zinc finger domain-containing protein 1   | -0.00714884254560107  | 0.966966454322624 | 0.991210985301503 | NA            | aag04120                                                                               | ETN61932.1 vitellog XP_001651215.1RING finger and CHY zinc finger domain-containing protein 1 |
| AAEL0109f long-chain-fatty-acid--CoA ligase 4                           | -0.00713370840973309  | 0.950610637921414 | 0.988345943124042 | NA            | aag01100 ; aag NA                                                                      | XP_019539970.1 PRE XP_001661275.2long-chain-fatty-acid--CoA ligase 4 isoform X2               |
| AAEL0049f HEAT repeat-containing protein 3                              | -0.00711576424663382  | 0.946608438967348 | 0.987646532539731 | NA            | NA                                                                                     | KXJ81823.1 hypothei XP_021700574.1HEAT repeat-containing protein 3                            |
| AAEL0043f chorion peroxidase                                            | -0.00706817021672985  | 0.960705027908544 | 0.989923653148286 | 940           | KXJ75130.1 hypothei XP_001649030.2chorion peroxidase                                   |                                                                                               |
| AAEL0197f NA                                                            | -0.00703110775980618  | 0.949908774857945 | 0.98806088919239  | NA            | NA                                                                                     | XP_021710944.1single-stranded DNA-binding protein 3 isoform X3                                |
| AAEL0090f superkiller viralicidic activity 2-like 2                     | -0.00693667459211292  | 0.963644300043762 | 0.990989530286399 | NA            | aag03018                                                                               | KXJ75949.1 hypothei XP_021700747.1superkiller viralicidic activity 2-like 2                   |
| AAEL0254f NA                                                            | -0.0067698065467393   | 0.953663237721408 | 0.989303184592491 | NA            | aag00564                                                                               | XP_021704521.1neuropathy target esterase sws isoform X2                                       |
| AAEL0038f transcription factor Sp4                                      | -0.00669881623717042  | 0.964787092706755 | 0.991092399652587 | NA            | NA                                                                                     | XP_019533368.1 PRE XP_021710246.1transcription factor Sp4 isoform X2                          |
| AAEL0070f mucin-5B                                                      | -0.0066032587912646   | 0.969031247541212 | 0.99153193073849  | NA            | NA                                                                                     | XP_021704230.1mucin-5B                                                                        |
| AAEL0120f NA                                                            | -0.00659906011194417  | 0.975298103325095 | 0.994190331004269 | NA            | aag04120                                                                               | ETN61969.1 nedd8-c XP_001662144.1NEDD8-conjugating enzyme UBE2F                               |
| AAEL0060f histidine protein methyltransferase 1 homolog                 | -0.00659604668832377  | 0.975759822672811 | 0.994190331004269 | NA            | NA                                                                                     | KXJ79129.1 hypothei XP_001651773.1histidine protein methyltransferase 1 homolog               |
| AAEL0091f probable cytochrome P450 6a14                                 | -0.00656104914187262  | 0.971609761589053 | 0.992802528468446 | NA            | NA                                                                                     | AEB77680.1 cytochrc XP_001653682.1probable cytochrome P450 6a14                               |
| AAEL0243f NA                                                            | -0.0065096877985447   | 0.982082456243901 | 0.995058661347322 | NA            | NA                                                                                     | XP_021697531.1transmembrane protein 209                                                       |
| AAEL0195f NA                                                            | -0.00648463691446795  | 0.951660775190973 | 0.988479524777666 | NA            | NA                                                                                     | XP_021703279.1protein kinase C and casein kinase II substrate protein 3 isoform X2            |
| AAEL0090f NA                                                            | -0.00641689006453421  | 0.954639866852316 | 0.989303184592491 | NA            | NA                                                                                     | KXJ84045.1 hypothei XP_021693885.1la-related protein 1 isoform X1                             |
| AAEL0094f protein RMD5 homolog A                                        | -0.00639993977840806  | 0.959550064786173 | 0.989441920233345 | NA            | NA                                                                                     | XP_001660018.1protein RMD5 homolog A isoform X2                                               |
| AAEL0030f epimerase family protein SDR39U1                              | -0.00634627437225356  | 0.95749521672967  | 0.989441920233345 | NA            | NA                                                                                     | KXJ82099.1 hypothei XP_021703495.1epimerase family protein SDR39U1 isoform X1                 |
| AAEL0129f uncharacterized LOC5577042                                    | -0.00626153669638279  | 0.954163736376586 | 0.989303184592491 | NA            | NA                                                                                     | XP_019533647.1 double-stranded RNA-specific edlase B2-like isoform X4                         |
| AAEL0220f NA                                                            | -0.00622777991196906  | 0.962066304067506 | 0.990224178616807 | NA            | NA                                                                                     | XP_019556378.1 unconventional myosin -Ixb-like isoform X5                                     |
| AAEL0059f multidrug resistance-associated protein 4                     | -0.00613804360418076  | 0.965762418405741 | 0.991210985301503 | NA            | NA                                                                                     | XP_001861842.1 mu XP_001651693.2multidrug resistance-associated protein 4                     |
| AAEL0137f electron transfer flavoprotein subunit alpha, mitochondrial   | -0.00613046966250065  | 0.954900117968975 | 0.989303184592491 | NA            | NA                                                                                     | XP_001663924.1electron transfer flavoprotein subunit alpha, mitochondrial                     |
| AAEL0103f polycomb protein Asx                                          | -0.0060268907396167   | 0.972322264313956 | 0.992802528468446 | NA            | NA                                                                                     | XP_021706586.1polycomb protein Asx                                                            |
| AAEL0106f 5-formyltetrahydrofolate cyclo-ligase                         | -0.00595770124865292  | 0.968188161846353 | 0.991220636062002 | NA            | aag01100 ; aag KXJ75227.1 hypothei XP_001654754.15-formyltetrahydrofolate cyclo-ligase |                                                                                               |
| AAEL0061f proteasome subunit beta type-3                                | -0.00595289115352187  | 0.960551800171856 | 0.989920222329647 | NA            | aag03050                                                                               | KFB35883.1 hypothe XP_001651824.1proteasome subunit beta type-3                               |
| AAEL0013f cleavage and polyadenylation specificity factor subunit 5     | -0.00581116110729195  | 0.975596785764348 | 0.994190331004269 | NA            | aag03015                                                                               | XP_019533445.1 PRE XP_001653167.1cleavage and polyadenylation specificity factor subunit 5    |
| AAEL0111f NA                                                            | -0.00575710229593473  | 0.960841068972243 | 0.989923653148286 | NA            | NA                                                                                     | XP_019535613.1 PRE XP_001661417.2protein hu-li tai shao isoform X2                            |
| AAEL0076f solute carrier organic anion transporter family member 3A1    | -0.00569561233994675  | 0.967923073294095 | 0.991220636062002 | NA            | NA                                                                                     | KXJ84223.1 hypothei XP_021700473.1solute carrier organic anion transporter family member 3A1  |
| AAEL0281f NA                                                            | -0.0055546668349942   | 0.977776187671245 | 0.994190331004269 | NA            | NA                                                                                     | XP_021697568.1serine/arginine repetitive matrix protein 1-like                                |
| AAEL0123f general odorant-binding protein 72                            | -0.00539952348199195  | 0.972411344173669 | 0.992802528468446 | NA            | NA                                                                                     | AGI04325.1 obp55 f XP_001655977.1general odorant-binding protein 72                           |
| AAEL0073f uncharacterized LOC5569107                                    | -0.00539778158182452  | 0.965458842695695 | 0.991092399652587 | NA            | NA                                                                                     | XP_021700167.1uncharacterized protein LOC5569107                                              |
| AAEL0061f eIf-2-alpha kinase activator GCN1                             | -0.00532462489895584  | 0.9666836871679   | 0.991210985301503 | NA            | NA                                                                                     | KXJ70533.1 hypothei XP_001651826.2eIf-2-alpha kinase activator GCN1                           |
| AAEL0092f ubiquitin-conjugating enzyme E2 variant 1                     | -0.00513404113535078  | 0.961372476941386 | 0.989989876098325 | NA            | aag04624                                                                               | CRK92682.1 CLUMA_XP_021699132.1ubiquitin-conjugating enzyme E2 variant 1                      |
| AAEL0092f coronin-7                                                     | -0.00513345228029073  | 0.979624166290473 | 0.994485178621519 | NA            | NA                                                                                     | XP_021695075.1coronin-7 isoform X1                                                            |
| AAEL0194f NA                                                            | -0.00500856049963806  | 0.976494830851177 | 0.994190331004269 | NA            | aag04391 ; aag NA                                                                      | XP_021701909.1protein mothers against dpp isoform X1                                          |
| AAEL0110f protein tumorous imaginal discs, mitochondrial                | -0.00498096449112565  | 0.962963199090121 | 0.99071558930292  | NA            | NA                                                                                     | XP_019549477.1 PRE XP_001661333.1protein tumorous imaginal discs, mitochondrial isoform X2    |
| AAEL0129f rab GDP dissociation inhibitor alpha                          | -0.00497011495037185  | 0.965231456117519 | 0.991092399652587 | NA            | NA                                                                                     | XP_001663045.1rab GDP dissociation inhibitor alpha                                            |
| AAEL0128f mitochondrial import inner membrane translocase subunit TIM44 | -0.00492102582817754  | 0.972214141346211 | 0.992802528468446 | NA            | NA                                                                                     | XP_001662961.1mitochondrial import inner membrane translocase subunit TIM44                   |
| AAEL0182f NA                                                            | -0.00491497400895602  | 0.965144415248579 | 0.991092399652587 | NA            | aag02010                                                                               | XP_021697387.1probable multidrug resistance-associated protein lethal(2)03659                 |
| AAEL0181f UPF0668 protein C10orf76 homolog                              | -0.00490041079017108  | 0.973999390305766 | 0.993431876479014 | NA            | NA                                                                                     | NP_649841.1 CG837f XP_001661944.2UPF0668 protein C10orf76 homolog                             |
| AAEL0039f Wd repeat-containing protein 43                               | -0.00479293169631576  | 0.972329376175354 | 0.992802528468446 | NA            | aag03008                                                                               | KXJ69536.1 hypothei XP_001648132.1WD repeat-containing protein 43                             |
| AAEL0269f NA                                                            | -0.00469306750063125  | 0.976128032236521 | 0.994190331004269 | NA            | aag03018                                                                               | XP_021696919.1PAB-dependent poly(A)-specific ribonuclease subunit PAN3                        |
| AAEL0040f anaphase-promoting complex subunit 1                          | -0.00461738622722161  | 0.98253899306167  | 0.995302049114211 | NA            | aag04120                                                                               | KXJ77493.1 hypothei XP_021703880.1anaphase-promoting complex subunit 1                        |
| AAEL0026f probable cytochrome P450 9f2                                  | -0.0045970601102084   | 0.96636733331388  | 0.991210985301503 | NA            | NA                                                                                     | KXJ83348.1 hypothei XP_001661969.1probable cytochrome P450 9f2                                |
| AAEL0070f probable cytochrome P450 28a5                                 | -0.00453866672198026  | 0.978294464380392 | 0.994190331004269 | NA            | NA                                                                                     | XP_001652488.1probable cytochrome P450 28a5                                                   |
| AAEL0181f NA                                                            | -0.00452412284051796  | 0.980244929290238 | 0.99449893454789  | NA            | NA                                                                                     | XP_021707578.1Icaldin-D isoform X1                                                            |
| AAEL0050f uncharacterized protein C14orf119                             | -0.00436500486217327  | 0.98              |                   |               |                                                                                        |                                                                                               |

|                                                                                    |                        |                    |                   |                         |                     |                                                                                             |                                                                                         |
|------------------------------------------------------------------------------------|------------------------|--------------------|-------------------|-------------------------|---------------------|---------------------------------------------------------------------------------------------|-----------------------------------------------------------------------------------------|
| AAEL0128f transmembrane protein 94                                                 | -0.0026554208197207    | 0.985907473143462  | 0.995754644700487 | NA                      | NA                  | NA                                                                                          | XP_021695162.1transmembrane protein 94 isoform X3                                       |
| AAEL0035f F-box-like/WD repeat-containing protein TBL1XR1                          | -0.00259954462998335   | 0.988845521099541  | 0.997058916995799 | NA                      | aag04013 ; aag      | ETN64525.1 wd-repe                                                                          | XP_001656940.1F-box-like/WD repeat-containing protein TBL1XR1                           |
| AAEL0057f lysosomal alpha-mannosidase                                              | -0.00250542672948277   | 0.984900748720582  | 0.995717914606134 | 511                     | aag04142 ; aag      | KXJ74904.1 hypothe                                                                          | XP_001651410.1lysosomal alpha-mannosidase                                               |
| AAEL0008f 60S ribosomal protein L35a                                               | -0.00247663275977734   | 0.986147829773397  | 0.995888095870807 | NA                      | aag03010            | ETN62742.1 60S ribo                                                                         | XP_001651256.160S ribosomal protein L35a                                                |
| AAEL0021f transcriptional adapter 2B                                               | -0.00241009538576599   | 0.986829040417092  | 0.996195840265819 | NA                      | NA                  | KXJ72032.1 hypothe                                                                          | XP_021694314.1transcriptional adapter 2B                                                |
| AAEL0026f non-specific lipid-transfer protein                                      | -0.00237935875602781   | 0.984407156189283  | 0.995692124835154 | NA                      | aag01100 ; aag      | XP_001846129.1 nor                                                                          | XP_001662127.2non-specific lipid-transfer protein                                       |
| AAEL0004f SAM50-like protein CG7639                                                | -0.00237646795516606   | 0.98887428427759   | 0.997058916995799 | NA                      | NA                  | KXJ68887.1 hypothe                                                                          | XP_021706269.1SAM50-like protein CG7639                                                 |
| AAEL0104f ras-related protein Rab-48                                               | -0.00230433827226745   | 0.985669027848074  | 0.995754644700487 | NA                      | NA                  | NA                                                                                          | XP_001660824.1ras-related protein Rab-48                                                |
| AAEL0134f cingulin                                                                 | -0.00223348116893258   | 0.995892429980456  | 0.999035469616496 | NA                      | NA                  | NA                                                                                          | XP_019541225.1 cingulin-like                                                            |
| AAEL0090f putative serine protease F56F10.1                                        | -0.00220426936252968   | 0.986470423438427  | 0.996104557937057 | NA                      | NA                  | KXJ70163.1 hypothe                                                                          | XP_021697410.1putative serine protease F56F10.1                                         |
| AAEL0108f NA                                                                       | -0.00218444178524043   | 0.984018921342045  | 0.995692124835154 | NA                      | NA                  | NA                                                                                          | XP_021707119.1probable WRKY transcription factor protein 1 isoform X2                   |
| AAEL0022f 5'-AMP-activated protein kinase subunit beta-1                           | -0.00215071415692497   | 0.984905489734892  | 0.995717914606134 | aag0406f ; aag          | KXJ74955.1 hypothe  | XP_001654986.25'-AMP-activated protein kinase subunit beta-1                                |                                                                                         |
| AAEL0067f protein TSSC1                                                            | -0.00193830105650049   | 0.993773310032545  | 0.999035469616496 | NA                      | NA                  | ETN64279.1 TSSC1 [f                                                                         | XP_001652176.1protein TSSC1                                                             |
| AAEL0085f G patch domain-containing protein 1 homolog                              | -0.00174537813329475   | 0.99360281378227   | 0.999035469616496 | NA                      | NA                  | KXJ76573.1 hypothe                                                                          | XP_021709306.1G patch domain-containing protein 1 homolog                               |
| AAEL0035f E3 UFM1-protein ligase 1 homolog                                         | -0.00168931197189074   | 0.992013317766098  | 0.99841480368409  | NA                      | NA                  | KXJ80505.1 hypothe                                                                          | XP_001656941.2E3 UFM1-protein ligase 1 homolog                                          |
| AAEL0001f probable cleavage and polyadenylation specificity factor subunit 2       | -0.00148448634368302   | 0.993024357052312  | 0.999035469616496 | NA                      | aag03015            | ETN63991.1 cleavage                                                                         | XP_021712246.1probable cleavage and polyadenylation specificity factor subunit 2        |
| AAEL0078f NA                                                                       | -0.0013897607502762    | 0.989742109502109  | 0.997058916995799 | NA                      | NA                  | XP_019563402.1 PRE                                                                          | XP_001653981.2upstream-binding protein 1 isoform X2                                     |
| AAEL0195f NA                                                                       | -0.00133831813669957   | 0.994344400905005  | 0.999035469616496 | NA                      | NA                  | NA                                                                                          | XP_019549514.1 sex determination protein fox-1-like isoform X3                          |
| AAEL0205f NA                                                                       | -0.0011734199343098    | 0.99521643249109   | 0.999035469616496 | NA                      | NA                  | NA                                                                                          | XP_021709692.1furin-like protease 1                                                     |
| AAEL0194f NA                                                                       | -0.00102214862329923   | 0.996928741539372  | 0.999035469616496 | NA                      | NA                  | NA                                                                                          | XP_021701621.1uncharacterized protein LOC5564190                                        |
| AAEL0011f adenosine kinase                                                         | -0.00101380315814318   | 0.994300417659903  | 0.999035469616496 | 230                     | aag01100 ; aag      | KXJ73934.1 hypothe                                                                          | XP_001652432.1adenosine kinase                                                          |
| AAEL0114f 60S ribosomal protein L14                                                | -0.000982954150194059  | 0.994860502101803  | 0.999035469616496 | NA                      | aag03010            | KXJ71484.1 hypothe                                                                          | XP_021696259.160S ribosomal protein L14                                                 |
| AAEL0007f synaptotagmin 1                                                          | -0.000858787050888284  | 0.995086755554019  | 0.999035469616496 | NA                      | NA                  | XP_019561055.1 PRE                                                                          | XP_021703825.1synaptotagmin 1 isoform X3                                                |
| AAEL0132f protein aubergine                                                        | -0.000767280942188293  | 0.994570094371416  | 0.999035469616496 | NA                      | NA                  | NA                                                                                          | XP_021707306.1protein aubergine                                                         |
| AAEL0034f proteasome subunit beta-type-7                                           | -0.00069230734824844   | 0.995601024686739  | 0.999035469616496 | aag03050                | KXJ82808.1 hypothe  | XP_001656819.1proteasome subunit beta-type-7                                                |                                                                                         |
| AAEL0236f NA                                                                       | -0.000664882190236232  | 0.998048946567567  | 0.999569700295467 | NA                      | NA                  | NA                                                                                          | XP_021697301.1WD repeat, SAM and U-box domain-containing protein 1-like isoform X1      |
| AAEL0019f 28 kDa heat- and acid-stable phosphoprotein                              | -0.000630849341971169  | 0.995396568101201  | 0.999035469616496 | NA                      | NA                  | KXJ78704.1 hypothe                                                                          | XP_001654319.128 kDa heat- and acid-stable phosphoprotein                               |
| AAEL0281f NA                                                                       | -0.000604097804172751  | 0.996372697249881  | 0.999035469616496 | NA                      | NA                  | NA                                                                                          | XP_021696446.1uncharacterized protein LOC5570533                                        |
| AAEL0180f NA                                                                       | -0.000581786589832851  | 0.995852303192755  | 0.999035469616496 | NA                      | NA                  | NA                                                                                          | XP_021700278.1uncharacterized protein KIAA1109 isoform X5                               |
| AAEL0024f V-type proton ATPase subunit F                                           | -0.000579367928374839  | 0.996423517544035  | 0.999035469616496 | NA                      | aag01100 ; aag      | ETN63992.1 vacuola                                                                          | XP_001655376.1V-type proton ATPase subunit F                                            |
| AAEL0027f homeotic protein ocellless                                               | -0.000576316429726534  | 0.998994218389153  | 0.999716365318826 | NA                      | NA                  | XP_019542132.1 PRE                                                                          | XP_021703670.1homeotic protein ocellless isoform X2                                     |
| AAEL0025f sodium- and chloride-dependent glycine transporter 2                     | -0.000536824338819758  | 0.999035044578142  | 0.999716365318826 | NA                      | NA                  | KXJ81836.1 hypothe                                                                          | XP_001654776.2sodium- and chloride-dependent glycine transporter 2                      |
| AAEL0030f myotubularin-related protein 8                                           | -0.000471579003782502  | 0.996923312823311  | 0.999035469616496 | 04070 ; 00562           | aag01100 ; aag      | XP_019543592.1 PRE                                                                          | XP_001663101.2myotubularin-related protein 8 isoform X2                                 |
| AAEL0035f serine--pyruvate aminotransferase                                        | -0.0004694098694434    | 0.9972679428850478 | 0.999124090292425 | 440                     | KXJ69417.1 hypothe  | XP_001656924.2serine--pyruvate aminotransferase                                             |                                                                                         |
| AAEL0135f NA                                                                       | -0.000375661609598647  | 0.998604886028378  | 0.999716365318826 | NA                      | NA                  | NA                                                                                          | XP_021697046.1calcium uniporter protein, mitochondrial                                  |
| AAEL0119f zinc finger protein 620                                                  | -0.000318606584781329  | 0.999103231954955  | 0.999716365318826 | NA                      | NA                  | KXJ71669.1 hypothe                                                                          | XP_021705370.1zinc finger protein 620                                                   |
| AAEL0000f histone H4 transcription factor                                          | -0.000310018561613669  | 0.999173150300396  | 0.999716365318826 | NA                      | NA                  | XP_001867230.1 con                                                                          | XP_021705403.1histone H4 transcription factor                                           |
| AAEL0234f NA                                                                       | -0.0002885769400037485 | 0.998458810466999  | 0.999716365318826 | NA                      | NA                  | NA                                                                                          | XP_021698152.1zinc finger protein 2 isoform X4                                          |
| AAEL0098f nucleolar GTP-binding protein 1                                          | -0.00024630783343243   | 0.998614126798524  | 0.999716365318826 | NA                      | aag03008            | NA                                                                                          | XP_001654061.2nucleolar GTP-binding protein 1                                           |
| AAEL0044f NA                                                                       | -0.000175677893161601  | 0.998738255770886  | 0.999716365318826 | NA                      | aag04214 ; aag      | KXJ70328.1 hypothe                                                                          | XP_001649226.2transmembrane GTPase Marf isoform X2                                      |
| AAEL0145f protein-glucosylgalactosylhydroxylsine glucosidase                       | -0.0001118335955956    | 0.999991536502291  | 0.999991536502291 | NA                      | NA                  | NA                                                                                          | XP_021701920.1protein-glucosylgalactosylhydroxylsine glucosidase isoform X1             |
| AAEL0249f NA                                                                       | -0.04E+09              | 0.999586378764374  | 0.999864905417492 | NA                      | aag04144 ; aag      | NA                                                                                          | XP_021697527.1E3 ubiquitin-protein ligase Nedd-4 isoform X1                             |
| AAEL0126f probable ribosome biogenesis protein RLP24                               | -5.92E+09              | 0.999647590723856  | 0.999864905417492 | NA                      | aag03010            | ETN58510.1 ribosom                                                                          | XP_001656187.1probable ribosome biogenesis protein RLP24                                |
| AAEL0147f lysine--tRNA ligase                                                      | -5.04E+08              | 0.999640867540021  | 0.999864905417492 | 970                     | aag00970            | NA                                                                                          | XP_021697661.1lysine--tRNA ligase isoform X2                                            |
| AAEL0117f actin-related protein 2                                                  | -1.99E+09              | 0.999916291332243  | 0.999991536502291 | NA                      | NA                  | KFB38107.1 AGAP00                                                                           | XP_001655658.1actin-related protein 2 isoform X2                                        |
| AAEL0028f uncharacterized LOC5576238                                               | 0.000218966939829601   | 0.999103297244426  | 0.999716365318826 | NA                      | NA                  | KXJ78077.1 hypothe                                                                          | XP_001656016.2uncharacterized protein LOC5576238                                        |
| AAEL0182f NA                                                                       | 0.000432807238803698   | 0.997278283996514  | 0.999124090292425 | NA                      | NA                  | NA                                                                                          | XP_021702294.1cysteine/serine-rich nuclear protein 1                                    |
| AAEL0004f T-complex protein 1 subunit eta                                          | 0.000488321734141861   | 0.99668359656437   | 0.999035469616496 | NA                      | NA                  | KFB42366.1 AGAP00                                                                           | XP_001656981.1T-complex protein 1 subunit eta                                           |
| AAEL0139f 39S ribosomal protein L20, mitochondrial                                 | 0.000528986663016912   | 0.996972692619896  | 0.999035469616496 | aag03010                | NA                  | XP_001664205.139S ribosomal protein L20, mitochondrial                                      |                                                                                         |
| AAEL0014f E3 ubiquitin-protein ligase SHPRH                                        | 0.000566250683759593   | 0.997865370501861  | 0.999494627120728 | NA                      | NA                  | KXJ78401.1 hypothe                                                                          | XP_001659181.2E3 ubiquitin-protein ligase SHPRH                                         |
| AAEL0196f NA                                                                       | 0.000586849235467373   | 0.99687523705175   | 0.999035469616496 | NA                      | NA                  | NA                                                                                          | XP_021702392.1leucine-rich repeats and immunoglobulin-like domains protein 3 isoform X2 |
| AAEL0217f NA                                                                       | 0.000597869732993917   | 0.996052735676297  | 0.999035469616496 | NA                      | NA                  | NA                                                                                          | XP_021699402.1COP9 signalosome complex subunit 1b                                       |
| AAEL0091f mitochondrial inner membrane protein COX18                               | 0.000599394120606812   | 0.996489653774687  | 0.999035469616496 | NA                      | NA                  | KXJ84165.1 hypothe                                                                          | XP_021697327.1mitochondrial inner membrane protein COX18                                |
| AAEL0004f GRAM domain-containing protein 2B                                        | 0.000638811538350162   | 0.995892224388066  | 0.999035469616496 | NA                      | NA                  | XP_021707269.1GRAM domain-containing protein 2B isoform X2                                  |                                                                                         |
| AAEL0182f NA                                                                       | 0.0006652051457217218  | 0.99779896513338   | 0.999494627120728 | NA                      | NA                  | NA                                                                                          | XP_001661437.2ubiquitin carboxyl-terminal hydrolase 45                                  |
| AAEL0073f methyltransferase-like protein 9                                         | 0.000936782936848571   | 0.996179870121142  | 0.999035469616496 | NA                      | XP_011179493.1 PRE  | XP_021704304.1methyltransferase-like protein 9 isoform X2                                   |                                                                                         |
| AAEL0214f NA                                                                       | 0.000974544698338818   | 0.996087323500232  | 0.999035469616496 | aag04320                | NA                  | XP_021702165.1protein spire isoform X4                                                      |                                                                                         |
| AAEL0258f NA                                                                       | 0.00104186250624161    | 0.995195589612063  | 0.999035469616496 | NA                      | NA                  | XP_021701706.1uncharacterized protein LOC5577187                                            |                                                                                         |
| AAEL0101f sodium/potassium-transporting ATPase subunit beta-2                      | 0.00104708884499844    | 0.992696925859977  | 0.998884320586497 | NA                      | NA                  | XP_001654264.1sodium/potassium-transporting ATPase subunit beta-2                           |                                                                                         |
| AAEL0111f serine/threonine-protein kinase rio2                                     | 0.00112887406600171    | 0.994879866181454  | 0.999035469616496 | 04151 ; 05165 ; 04714 ; | aag03008            | KXJ69732.1 hypothe                                                                          | XP_001655107.1serine/threonine-protein kinase rio2                                      |
| AAEL0059f single-pass membrane and coiled-coil domain-containing protein 4 homolog | 0.00113013101808182    | 0.994919301513595  | 0.999035469616496 | NA                      | NA                  | KFB4831.1 AGAP00                                                                            | XP_001651591.1single-pass membrane and coiled-coil domain-containing protein 4 homolog  |
| AAEL0047f methionine aminopeptidase 2                                              | 0.00120612300280942    | 0.990879292868898  | 0.997774694479122 | NA                      | NA                  | KFB45569.1 hypothe                                                                          | XP_001649726.1methionine aminopeptidase 2                                               |
| AAEL0123f IDLSRF-like peptide                                                      | 0.00125769487199304    | 0.994382185537601  | 0.999035469616496 | NA                      | NA                  | ETN67141.1 Prohorn                                                                          | XP_001662506.1IDLSRF-like peptide                                                       |
| AAEL0134f nucleolar protein 10                                                     | 0.00134416936182029    | 0.994309402891074  | 0.999035469616496 | NA                      | NA                  | NA                                                                                          | XP_001656717.2nucleolar protein 10                                                      |
| AAEL0117f GPN-loop GTPase 2                                                        | 0.00142716473678266    | 0.996224509970815  | 0.999035469616496 | NA                      | NA                  | KFB35001.1 AGAP00                                                                           | XP_001661906.1GPN-loop GTPase 2                                                         |
| AAEL0125f 60S ribosomal protein L7                                                 | 0.00153579822636968    | 0.991028769248146  | 0.997774694479122 | aag03010                | ETN65433.1 60S ribo | XP_001656140.160S ribosomal protein L7                                                      |                                                                                         |
| AAEL0119f myosin-IB                                                                | 0.00154117440296022    | 0.989674750291224  | 0.997058916995799 | NA                      | XP_019538866.1 PRE  | XP_021708644.1myosin-IB isoform X2                                                          |                                                                                         |
| AAEL0079f CWF19-like protein 2                                                     | 0.00159669380183972    | 0.99475205723503   | 0.999035469616496 | NA                      | NA                  | KXJ74146.1 hypothe                                                                          | XP_001658727.1CWF19-like protein 2                                                      |
| AAEL0041f 60S ribosomal protein L29                                                | 0.00168176184494209    | 0.991160452318371  | 0.997774694479122 | aag03010                | XP_001846341.1 60S  | XP_001648594.160S ribosomal protein L29                                                     |                                                                                         |
| AAEL0074f F-box/LRR-repeat protein 20                                              | 0.0016957193953415     | 0.99113294051929   | 0.997774694479122 | NA                      | NA                  | KXJ70748.1 hypothe                                                                          | XP_021701053.1F-box/LRR-repeat protein 20                                               |
| AAEL0269f NA                                                                       | 0.00180620854124927    | 0.987280064693696  | 0.996375409940227 | NA                      | NA                  | XP_021707478.1c-myc promoter-binding protein isoform X2                                     |                                                                                         |
| AAEL0135f WD repeat-containing protein 7                                           | 0.00183738022629587    | 0.987053055435807  | 0.996255590292575 | NA                      | NA                  | XP_021700396.1WD repeat-containing protein 7 isoform X3                                     |                                                                                         |
| AAEL0097f homeobox protein abdominal-A homolog                                     | 0.00189965260272232    | 0.991351423274513  | 0.99785777696041  | NA                      | NA                  | NP_001345961.1homeobox protein abdominal-A homolog                                          |                                                                                         |
| AAEL0014f hydroxysteroid dehydrogenase-like protein 2                              | 0.00196676249876799    | 0.994728499042757  | 0.999035469616496 | NA                      | NA                  | KXJ71511.1 hypothe                                                                          | XP_001659208.2hydroxysteroid dehydrogenase-like protein 2                               |
| AAEL0143f adrenodoxin                                                              | 0.00201366193617407    | 0.985368376958256  | 0.995754644700487 | NA                      | NA                  | NA                                                                                          | XP_019560972.1 adrenodoxin-like                                                         |
| AAEL0105f valacyclovir hydrolase                                                   | 0.00202910311717163    | 0.993096116633404  | 0.999035469616496 | NA                      | NA                  | KXJ76479.1 hypothe                                                                          | XP_021693961.1valacyclovir hydrolase                                                    |
| AAEL0102f BUD13 homolog                                                            | 0.00211490691498165    | 0.995238177132998  | 0.999035469616496 | NA                      | NA                  | XP_001654397.1BUD13 homolog                                                                 |                                                                                         |
| AAEL0005f myotubularin-related protein 3                                           | 0.00213985275767056    | 0.984438921076965  | 0.995692124835154 | aag01100 ; aag          | NA                  | XP_001648676.2myotubularin-related protein 3 isoform X4                                     |                                                                                         |
| AAEL0217f NA                                                                       | 0.00232412353914873    | 0.987446715907952  | 0.99643433268834  | NA                      | NA                  | XP_021700330.1peptidylprolyl isomerase domain and WD repeat-containing protein 1 isoform X1 |                                                                                         |
| AAEL0245f NA                                                                       | 0.00249949387049112    | 0.988956621596363  | 0.997058916995799 | NA                      | NA                  | XP_021699069.1G-protein coupled receptor Mth2                                               |                                                                                         |
| AAEL0120f TM2 domain-containing protein CG10795                                    | 0.00254940163848975    | 0.992551748441878  | 0.998847461631908 | NA                      | XP_001865009.1 TM   | XP_001655841.2 TM2 domain-containing protein CG10795                                        |                                                                                         |
| AAEL0066f ankryn repeat domain-containing protein 13C                              | 0.0026240632555394     | 0.985099792534568  | 0.995717914606134 | NA                      | NA                  | XP_019535751.1 PRE                                                                          | XP_021701564.1ankryn repeat domain-containing protein 13C isoform X1                    |

|                                                                                   |                      |                   |                    |               |                   |                                                                              |                                                                                       |
|-----------------------------------------------------------------------------------|----------------------|-------------------|--------------------|---------------|-------------------|------------------------------------------------------------------------------|---------------------------------------------------------------------------------------|
| AAEL0120f sodium/potassium-transporting ATPase subunit alpha                      | 0.00265977855009475  | 0.983346155207112 | 0.995614477295785  | NA            | NA                | NA                                                                           | XP_021693479.1sodium/potassium-transporting ATPase subunit alpha isoform X1           |
| AAEL0209f NA                                                                      | 0.00266115808231567  | 0.980355557750158 | 0.99449893454789   | NA            | NA                | NA                                                                           | XP_019553800.1 transcription factor HIVEP3 isoform X2                                 |
| AAEL0108f ADP,ATP carrier protein 2                                               | 0.00271466250149621  | 0.986842187578808 | 0.996195840265819  | NA            | NA                | KFB38207.1 hypothe                                                           | XP_021713281.1ADP,ATP carrier protein 2                                               |
| AAEL0015f: protein yippee-like CG15309                                            | 0.002747200685636    | 0.981775742582571 | 0.994967005260002  | NA            | NA                | ETN65289.1 fad nad                                                           | XP_001659550.1protein yippee-like CG15309 isoform X1                                  |
| AAEL0269f NA                                                                      | 0.00276197346871288  | 0.980249993501983 | 0.99449893454789   | NA            | aag04142 ; aag NA | XP_019553531.1 beta-mannosidase-like                                         |                                                                                       |
| AAEL0029f probable cytosolic iron-sulfur protein assembly protein C1ao1           | 0.0028886660064997   | 0.985879643487411 | 0.995754644700487  | NA            | NA                | KXJ78870.1 hypothei                                                          | XP_001662680.2probable cytosolic iron-sulfur protein assembly protein C1ao1           |
| AAEL0022f decaprenyl-diphosphate synthase subunit 1                               | 0.00293831988651996  | 0.980831274813004 | 0.994557508631324  | NA            | aag00900          | KFB39644.1 AGAP00                                                            | XP_021694884.1decaprenyl-diphosphate synthase subunit 1                               |
| AAEL0042f IgLON family member 5                                                   | 0.00298624784579021  | 0.980449286483205 | 0.99449893454789   | NA            | NA                | XP_019542861.1 PRÉ                                                           | XP_021708440.1protein amalgam isoform X1                                              |
| AAEL0004f: ATP-binding cassette sub-family B member 10, mitochondrial             | 0.00298953254098459  | 0.984086658781631 | 0.995692124835154  | NA            | aag02010          | KXJ80823.1 hypothei                                                          | XP_001656464.2ATP-binding cassette sub-family B member 10, mitochondrial              |
| AAEL0246f NA                                                                      | 0.00301518806688066  | 0.98979930523278  | 0.997058916995799  | NA            | NA                | NA                                                                           | XP_021713205.1uncharacterized protein LOC23687519                                     |
| AAEL0119f: lipase maturation factor 2                                             | 0.00311059310175944  | 0.983243210965065 | 0.995614477295785  | NA            | NA                | KXJ79463.1 hypothei                                                          | XP_021705363.1lipase maturation factor 2                                              |
| AAEL0237f NA                                                                      | 0.00317903789064673  | 0.9911053783849   | 0.997774694479122  | NA            | NA                | NA                                                                           |                                                                                       |
| AAEL0194f NA                                                                      | 0.00320917948190008  | 0.977660871733377 | 0.994190331004269  | NA            | NA                | XP_021702806.1growth hormone-inducible transmembrane protein                 |                                                                                       |
| AAEL0049f phosphoglycerate kinase                                                 | 0.00324689641651191  | 0.984223936520111 | 0.995692124835154  | 00010 ; 00710 | aag01100 ; aag XP | XP_019544436.1 PRÉ                                                           | XP_001650133.1phosphoglycerate kinase                                                 |
| AAEL0228f NA                                                                      | 0.00328158482680195  | 0.976935568821109 | 0.994190331004269  | NA            | aag04144 ; aag NA | XP_021710115.1clathrin heavy chain isoform X1                                |                                                                                       |
| AAEL0260f NA                                                                      | 0.00345170202520938  | 0.989621613492473 | 0.997058916995799  | NA            | NA                | NA                                                                           |                                                                                       |
| AAEL0125f wiskott-Aldrich syndrome protein family member 2                        | 0.00357845669428536  | 0.984565355619014 | 0.995710561864619  | NA            | NA                | KXJ78584.1 hypothei                                                          | XP_001662630.2wiskott-Aldrich syndrome protein family member 2                        |
| AAEL0049f: uncharacterized LOC5565742                                             | 0.00364905425095885  | 0.989780997662054 | 0.997058916995799  | NA            | NA                | KXJ67934.1 hypothei                                                          | XP_001650082.2uncharacterized protein LOC5565742                                      |
| AAEL0195f NA                                                                      | 0.00368045344914498  | 0.983388392104041 | 0.995614477295785  | NA            | NA                | NA                                                                           | XP_021701531.1histone demethylase UTY isoform X1                                      |
| AAEL0109f: Importin subunit alpha-f                                               | 0.00376362426906002  | 0.973602876818617 | 0.993357763885677  | NA            | NA                | KFB47017.1 AGAP00                                                            | XP_021697593.1importin subunit alpha-f                                                |
| AAEL0021f tRNA-dihydrouridine(16/17) synthase [NAD(P)(+)]-like                    | 0.0037990216894872   | 0.977215941283596 | 0.994190331004269  | NA            | NA                | KXJ69942.1 hypothei                                                          | XP_021703402.1tRNA-dihydrouridine(16/17) synthase [NAD(P)(+)]-like                    |
| AAEL0280f NA                                                                      | 0.00385115047009707  | 0.978283733311589 | 0.994190331004269  | NA            | aag03010          | NA                                                                           | XP_021696321.160S ribosomal protein L28                                               |
| AAEL0010f: nuclear RNA export factor 1                                            | 0.00389651276038365  | 0.974353777740678 | 0.993573078764375  | NA            | aag03013 ; aag    | KXJ71205.1 hypothei                                                          | XP_001657723.1nuclear RNA export factor 1                                             |
| AAEL0217f NA                                                                      | 0.00390964828717691  | 0.974157197974745 | 0.993482714813655  | NA            | NA                | NA                                                                           | XP_021699637.1 dnaI homolog subfamily C member 13                                     |
| AAEL0195f NA                                                                      | 0.00397037179659423  | 0.979787288565821 | 0.994485178621519  | 4660          | aag04013          | NA                                                                           | XP_021710428.1tyrosine-protein kinase shark isoform X2                                |
| AAEL0120f: V-type proton ATPase subunit E                                         | 0.00399206033141462  | 0.972850155140492 | 0.993140351409231  | NA            | aag01100 ; aag    | ETN59925.1 vacuolar                                                          | XP_001655825.1V-type proton ATPase subunit E                                          |
| AAEL0047f: very long-chain specific acyl-CoA dehydrogenase, mitochondrial         | 0.00410282644719244  | 0.970040076221191 | 0.992008473067494  | NA            | aag01100 ; aag    | KXJ72282.1 hypothei                                                          | XP_021701024.1very long-chain specific acyl-CoA dehydrogenase, mitochondrial          |
| AAEL0217f NA                                                                      | 0.00416444206193503  | 0.975679771024678 | 0.994190331004269  | NA            | aag04141 ; aag NA | XP_001648070.2eukaryotic translation initiation factor 2-alpha kinase        |                                                                                       |
| AAEL0198f NA                                                                      | 0.00419265890362725  | 0.970124347873764 | 0.992008473067494  | NA            | NA                | NA                                                                           | XP_021702265.1leupaxin isoform X3                                                     |
| AAEL0154f: zinc finger imprinted 3                                                | 0.00421035668534849  | 0.986885598768007 | 0.996195840265819  | NA            | NA                | NA                                                                           | XP_001656484.2zinc finger imprinted 3                                                 |
| AAEL0043f: alpha-mannosidase 2                                                    | 0.00425403286787102  | 0.977945637222698 | 0.994190331004269  | NA            | aag00511          | XP_001845213.1 ma                                                            | XP_021693010.1alpha-mannosidase 2                                                     |
| AAEL0091f: fasciclin-2                                                            | 0.00439391440845858  | 0.978566656808592 | 0.99423231307571   | NA            | NA                | NA                                                                           | XP_001659793.2fasciclin-2 isoform X6                                                  |
| AAEL0076f: casein kinase I                                                        | 0.0044209656083957   | 0.967120689897006 | 0.991210985301503  | NA            | aag04310 ; aag    | ETN65174.1 casein k                                                          | XP_001658552.1casein kinase I                                                         |
| AAEL0196f NA                                                                      | 0.00444618481628745  | 0.968288709338803 | 0.991220636062002  | NA            | NA                | XP_021703463.1von Willebrand factor D and EGF domain-containing protein-like |                                                                                       |
| AAEL0149f: F-box only protein 9                                                   | 0.00446541675305607  | 0.967352886071841 | 0.991210985301503  | NA            | NA                | NA                                                                           | XP_021697723.1F-box only protein 9                                                    |
| AAEL0209f NA                                                                      | 0.00447388746351599  | 0.969335062918025 | 0.991531930743849  | NA            | aag01100 ; aag NA | XP_021696749.1carbonic anhydrase 1                                           |                                                                                       |
| AAEL0009f: mitochondrial import inner membrane translocase subunit Tim8           | 0.0045358260877523   | 0.966857754162266 | 0.991210985301503  | NA            | NA                | KXJ69528.1 hypothei                                                          | XP_001657489.1mitochondrial import inner membrane translocase subunit Tim8            |
| AAEL0124f: integrin beta-P5                                                       | 0.00455570001560663  | 0.968839890116019 | 0.9914662655337    | NA            | aag04145 ; aag    | XP_021695415.1integrin beta isoform X1                                       |                                                                                       |
| AAEL0140f NA                                                                      | 0.004611102032725663 | 0.984673789875844 | 0.995710792795332  | NA            | NA                | NA                                                                           | NP_001345960.1homeotic protein ultrathorax                                            |
| AAEL0145f: sideroflexin-1                                                         | 0.00461317853877669  | 0.966183839282131 | 0.991210985301503  | NA            | NA                | NA                                                                           | XP_019541044.1 sideroflexin-1-like                                                    |
| AAEL0115f: angiogenic factor with G patch and FHA domains 1                       | 0.00463939124728251  | 0.980372658582947 | 0.99449893454789   | NA            | NA                | XP_019544102.1 PRÉ                                                           | XP_021697033.1angiogenic factor with G patch and FHA domains 1 isoform X2             |
| AAEL0043f: eukaryotic translation initiation factor 1A, X-chromosomal             | 0.0047159935252017   | 0.967880518257725 | 0.991220636062002  | NA            | aag03013          | ETN59410.1 eukaryo                                                           | XP_001649007.1eukaryotic translation initiation factor 1A, X-chromosomal              |
| AAEL0068f: protein FRG1 homolog                                                   | 0.00472586231899729  | 0.987175411629963 | 0.994967005260002  | NA            | NA                | KXJ73901.1 hypothei                                                          | XP_001652245.1protein FRG1 homolog                                                    |
| AAEL0018f: uncharacterized LOC5572647                                             | 0.00475770212457071  | 0.967282662447493 | 0.991210985301503  | NA            | NA                | KXJ79697.1 hypothei                                                          | XP_001654146.2uncharacterized protein LOC5572647                                      |
| AAEL0086f: G protein alpha subunit 2                                              | 0.00477381091213734  | 0.97310485164315  | 0.993357763885677  | NA            | NA                | CRLO6717.1 CLUMA_                                                            | KFB50440.1GTP-binding protein (o) alpha subunit, gnao                                 |
| AAEL0131f: uncharacterized LOC5577253                                             | 0.00483229068698094  | 0.979716592336403 | 0.994485178621519  | NA            | NA                | NA                                                                           | XP_021704983.1uncharacterized protein LOC5577253 isoform X3                           |
| AAEL0197f NA                                                                      | 0.00489020131366591  | 0.989656960977885 | 0.997058916995799  | NA            | NA                | NA                                                                           | XP_021707464.1UPF0769 protein CG18675                                                 |
| AAEL0132f: 60S ribosomal protein L37a                                             | 0.00494740383389647  | 0.973240555303271 | 0.993357763885677  | NA            | aag03010          | NA                                                                           | XP_001663436.160S ribosomal protein L37a                                              |
| AAEL0009f: clathrin light chain                                                   | 0.00495433437075437  | 0.967462393222662 | 0.991210985301503  | NA            | NA                | NA                                                                           | XP_001657495.2clathrin light chain isoform X2                                         |
| AAEL0224f NA                                                                      | 0.00501196091261296  | 0.96531913666126  | 0.991092399652587  | NA            | NA                | NA                                                                           | XP_021708342.1transcription factor E2f1                                               |
| AAEL0227f NA                                                                      | 0.00501715108532141  | 0.971682259146447 | 0.992802528468446  | NA            | aag04120          | NA                                                                           | XP_001648569.1ubiquitin-conjugating enzyme E2-22 kDa                                  |
| AAEL0001f: histone deacetylase complex subunit SAP30 homolog                      | 0.00507963428429211  | 0.981558561978577 | 0.9949660659410318 | NA            | NA                | ETN65024.1 sap30 [r                                                          | XP_001657686.1histone deacetylase complex subunit SAP30 homolog                       |
| AAEL0121f: tRNA-dihydrouridine(20) synthase [NAD(P)+]-like                        | 0.00510128659943747  | 0.981458836880502 | 0.9949660659410318 | NA            | NA                | KXJ68617.1 hypothei                                                          | XP_001655871.1tRNA-dihydrouridine(20) synthase [NAD(P)+]-like                         |
| AAEL0116f: exopolyphosphatase PRUNE1                                              | 0.00510180080489774  | 0.98328935961507  | 0.995614477295785  | 190           | aag01100 ; aag    | KXJ69594.1 hypothei                                                          | XP_001655485.2exopolyphosphatase PRUNE1                                               |
| AAEL0001f: omega-amidase NIT2                                                     | 0.00539572592231726  | 0.962138054880773 | 0.990224178616807  | NA            | aag01100 ; aag XP | XP_001864905.1 hyc                                                           | XP_001657671.1omega-amidase NIT2                                                      |
| AAEL0139f: ATP-dependent Clp protease ATP-binding subunit clpX-like, mitochondria | 0.00540543800458054  | 0.96387278297566  | 0.99101283120624   | NA            | NA                | NA                                                                           | XP_001664208.1ATP-dependent Clp protease ATP-binding subunit clpX-like, mitochondrial |
| AAEL027                                                                           |                      |                   |                    |               |                   |                                                                              |                                                                                       |

|                                                                                 |                     |                    |                   |              |               |                                                                   |                                                                                            |
|---------------------------------------------------------------------------------|---------------------|--------------------|-------------------|--------------|---------------|-------------------------------------------------------------------|--------------------------------------------------------------------------------------------|
| AAEL0095f mucin-SAC                                                             | 0.00652817877659705 | 0.976628562155591  | 0.994190331004269 | NA           | NA            | NA                                                                | XP_019544286.1 mucin-3A-like                                                               |
| AAEL0201E NA                                                                    | 0.00665797580567334 | 0.964784118798122  | 0.991092399652587 | NA           | aag04068      | NA                                                                | XP_021701521.1G2/mitotic-specific cyclin-B3 isoform X1                                     |
| AAEL0145f 60S ribosomal protein L12                                             | 0.00666562902118053 | 0.961962846326498  | 0.990224178616807 | NA           | aag03010      | NA                                                                | XP_001647834.160S ribosomal protein L12                                                    |
| AAEL0019f eukaryotic translation initiation factor 4E                           | 0.00674437788737496 | 0.950157662297702  | 0.98806088919239  | NA           | aag03013; aag | KXJ84244.1 hypothei                                               | XP_001654344.1eukaryotic translation initiation factor 4E isoform X2                       |
| AAEL0103f ruvB-like helicase 2                                                  | 0.00706525490212344 | 0.9609068616854121 | 0.989923653148286 | NA           | NA            | NA                                                                | XP_001654452.1ruvB-like helicase 2                                                         |
| AAEL0045f unc-112-related protein                                               | 0.0071230070507094  | 0.946821512381953  | 0.987707093985696 | NA           | NA            | KF836913.1 AGAP00                                                 | XP_001649404.1unc-112-related protein                                                      |
| AAEL0094f zinc finger protein on ecydson puffs                                  | 0.00714884470104581 | 0.949166209872839  | 0.98806088919239  | NA           | NA            | NA                                                                | XP_021698458.1zinc finger protein on ecydson puffs isoform X1                              |
| AAEL0236f NA                                                                    | 0.00715442511890487 | 0.983200781561203  | 0.995614477295785 | NA           | NA            | NA                                                                | NA                                                                                         |
| AAEL0005f uncharacterized LOC5578440                                            | 0.00730637816584804 | 0.9550442671020976 | 0.989341139916873 | NA           | NA            | XP_312940.5 AGAP00                                                | XP_001656957.2uncharacterized protein LOC5578440                                           |
| AAEL0037f exportin-6-A                                                          | 0.00731194737873369 | 0.955547067824749  | 0.989441920233345 | NA           | NA            | XP_019525741.1 PRE                                                | XP_021696427.1exportin-6-A isoform X2                                                      |
| AAEL0077f tuberin                                                               | 0.00737600677595891 | 0.960333237147154  | 0.989916707542076 | NA           | aag04150; aag | XP_019565128.1 PRE                                                | XP_001652850.2tuberin isoform X1                                                           |
| AAEL0017f fatty acyl-CoA reductase wat                                          | 0.00739258274327161 | 0.967582987440637  | 0.991210985031503 | 73           | NA            | KXJ76239.1 hypothei                                               | XP_001660265.2fatty acyl-CoA reductase wat                                                 |
| AAEL0091f vacuolar fusion protein MON1 homolog A                                | 0.00747161820283038 | 0.970293057332315  | 0.99207704595244  | NA           | NA            | KXJ72052.1 hypothei                                               | XP_001659778.1vacuolar fusion protein MON1 homolog A                                       |
| AAEL0147f NA                                                                    | 0.00747509611421148 | 0.9536724204707724 | 0.989303184592491 | NA           | aag01100; aag | NA                                                                | XP_001649622.2glutaryl-CoA dehydrogenase, mitochondrial                                    |
| AAEL0052f uncharacterized LOC5566220                                            | 0.00748313322331382 | 0.958750999741161  | 0.989441920233345 | NA           | NA            | KXJ79965.1 hypothei                                               | ABF18352.1farnesoic acid O-methyl transferase-like protein                                 |
| AAEL0086f acylglycerol kinase, mitochondrial                                    | 0.00750073876781471 | 0.964425914727556  | 0.991092399652587 | NA           | aag01100; aag | KXJ72072.1 hypothei                                               | XP_001653417.2acylglycerol kinase, mitochondrial                                           |
| AAEL0073f uncharacterized LOC5569024                                            | 0.00750531530242893 | 0.993337360407771  | 0.999035469616496 | NA           | NA            | KXJ79670.1 hypothei                                               | XP_001658277.1uncharacterized protein LOC5569024                                           |
| AAEL0083f 2-oxoisovalerate dehydrogenase subunit alpha, mitochondrial           | 0.00770418819341739 | 0.969804979956678  | 0.991902348067284 | 00640; 00280 | aag01100; aag | KXJ75720.1 hypothei                                               | XP_001653215.12-oxoisovalerate dehydrogenase subunit alpha, mitochondrial                  |
| AAEL0023f leucine-rich repeat neuronal protein 3                                | 0.00770586985881564 | 0.980631884829606  | 0.994557508631324 | NA           | NA            | XP_019563352.1 PRE                                                | XP_001661262.1leucine-rich repeat neuronal protein 3 isoform X2                            |
| AAEL0290f NA                                                                    | 0.00772567101980761 | 0.945458920383637  | 0.987398325447749 | NA           | NA            | NA                                                                | XP_001655529.2elongation factor Ts, mitochondrial isoform X1                               |
| AAEL0217f NA                                                                    | 0.00781791255463211 | 0.961792683272085  | 0.990224178616807 | NA           | NA            | NA                                                                | XP_021694959.1probable alpha-aspartyl dipeptidase                                          |
| AAEL0266f NA                                                                    | 0.007829808242964   | 0.945283850970751  | 0.987398325447749 | NA           | aag03018      | NA                                                                | XP_021701553.1mediator of RNA polymerase II transcription subunit 13 isoform X4            |
| AAEL0034f carboxy-terminal domain RNA polymerase II polypeptide A small phospho | 0.00794000939867426 | 0.956406493961579  | 0.989441920233345 | 04660; 04658 | NA            | XP_001849639.1 nuc                                                | XP_021711079.1 carboxy-terminal domain RNA polymerase II polypeptide A small phosphatase 1 |
| AAEL0108f mitogen-activated protein kinase kinase kinase 11                     | 0.00796260929362697 | 0.963609953592665  | 0.990998530286399 | NA           | NA            | XP_019531551.1 PRE                                                | XP_021698005.1mitogen-activated protein kinase kinase kinase 11 isoform X1                 |
| AAEL0025f polyadenylate-binding protein-interacting protein 2                   | 0.00797205014714224 | 0.947488311817901  | 0.987743607411212 | NA           | NA            | ETN58296.1 hypothe                                                | XP_001655603.1polyadenylate-binding protein-interacting protein 2                          |
| AAEL0270f NA                                                                    | 0.00815319362298021 | 0.967620982499827  | 0.991210985301503 | NA           | NA            | NA                                                                | XP_021703913.1guanine nucleotide exchange factor MSS4 homolog                              |
| AAEL009f uncharacterized LOC5568624                                             | 0.00823196379844079 | 0.940376204772541  | 0.985798796572901 | NA           | NA            | KXJ77168.1 hypothei                                               | XP_001652458.1uncharacterized protein LOC5568624                                           |
| AAEL0001f protein NipSnap                                                       | 0.00833562149816465 | 0.94542844819487   | 0.987398325447749 | NA           | NA            | XP_001864008.1 con                                                | XP_001658894.2protein NipSnap                                                              |
| AAEL0109f queuine tRNA-ribosyltransferase catalytic subunit                     | 0.00842243071069315 | 0.964922859317248  | 0.991092399652587 | NA           | NA            | KXJ84342.1 hypothei                                               | XP_001661277.2queuine tRNA-ribosyltransferase catalytic subunit                            |
| AAEL0002f uncharacterized protein C12orf31 homolog                              | 0.00849529164065419 | 0.946646643881811  | 0.987646532539731 | NA           | NA            | ETN59585.1 hypothe                                                | XP_019525229.1 protein LLP homolog                                                         |
| AAEL0122f uncharacterized LOC5575970                                            | 0.00868841914185726 | 0.969317088953114  | 0.991531930743849 | NA           | NA            | KXJ73188.1 hypothei                                               | XP_001662323.1uncharacterized protein LOC5575970                                           |
| AAEL0054f uncharacterized protein CG10915                                       | 0.00885248253176655 | 0.979639259849307  | 0.994485178621519 | NA           | NA            | NA                                                                | XP_001650934.2uncharacterized protein CG10915 isoform X4                                   |
| AAEL0134f catalase                                                              | 0.00889769210723746 | 0.939765114301796  | 0.985798796572901 | 00630; 00380 | aag01100; aag | NA                                                                | XP_001663600.1catalase isoform X1                                                          |
| AAEL0147f uncharacterized protein G6orf106 homolog                              | 0.0088990136205933  | 0.947320371811578  | 0.987743607411212 | NA           | NA            | XP_021706928.1uncharacterized protein G6orf106 homolog isoform X1 |                                                                                            |
| AAEL0040f aladin                                                                | 0.00890889278558169 | 0.968236059198298  | 0.991220636062002 | NA           | aag03013      | KXJ74668.1 hypothei                                               | XP_019558903.1 aladin-like                                                                 |
| AAEL0174f chorion peroxidase                                                    | 0.00898060416836106 | 0.964623239766836  | 0.991092399652587 | NA           | NA            | XP_021708476.1chorion peroxidase                                  | XP_021708476.1chorion peroxidase                                                           |
| AAEL0132f coatomer subunit delta                                                | 0.0090165793777128  | 0.937263671619404  | 0.984619988774498 | NA           | NA            | NA                                                                | XP_001663404.1coatomer subunit delta                                                       |
| AAEL0215f NA                                                                    | 0.00915804669416559 | 0.949472132755931  | 0.98806088919239  | NA           | NA            | NA                                                                | NA                                                                                         |
| AAEL0019f ejaculatory bulb-specific protein 3                                   | 0.00929439168823261 | 0.976859308125911  | 0.994190331004269 | NA           | NA            | KXJ81669.1 hypothei                                               | XP_001660753.1ejaculatory bulb-specific protein 3                                          |
| AAEL0235f NA                                                                    | 0.00931716433692701 | 0.95839314643167   | 0.989441920233345 | NA           | NA            | XP_001653285.1solute carrier family 35 member F5                  | XP_001653285.1solute carrier family 35 member F5                                           |
| AAEL0101f kelch domain-containing protein 4                                     | 0.0093208334119749  | 0.956578676021135  | 0.989441920233345 | NA           | NA            | NA                                                                | XP_001660646.2kelch domain-containing protein 4                                            |
| AAEL0122f platelet-activating factor acetylhydrolase IB subunit beta homolog    | 0.00932867685802534 | 0.965436934829985  | 0.991092399652587 | NA           | aag01100; aag | XP_001861941.1 pla                                                | XP_001662362.1platelet-activating factor acetylhydrolase IB subunit beta homolog           |
| AAEL0015f bcl-2-related ovarian killer protein                                  | 0.00934579042947632 | 0.965129947076321  | 0.987398325447749 | NA           | aag04214; aag | BAV03492.1 proapo                                                 | XP_001659566.1bcl-2-related ovarian killer protein                                         |
| AAEL0137f uncharacterized LOC5578565                                            | 0.0095899099997449  | 0.977060520366544  | 0.994190331004269 | NA           | NA            | NA                                                                | XP_001663955.2uncharacterized protein LOC5578565 isoform X1                                |
| AAEL0270f NA                                                                    | 0.00963221280976158 | 0.961234059136193  | 0.98958121115976  | NA           | NA            | NA                                                                | NA                                                                                         |
| AAEL0140f histone acetyltransferase Tip60                                       | 0.00965303541347569 | 0.973767255454139  | 0.993377986871678 | NA           | NA            | XP_021706851.1histone acetyltransferase Tip60                     | XP_021706851.1histone acetyltransferase Tip60                                              |
| AAEL0275f NA                                                                    | 0.00966648561278523 | 0.977676838934034  | 0.994190331004269 | NA           | aag04150; aag | NA                                                                | XP_021700021.1protein L5T8 homolog                                                         |
| AAEL0082f mediator of RNA polymerase II transcription subunit 12                | 0.00971181678887956 | 0.940133148039672  | 0.985798796572901 | NA           | NA            | KF842818.1 AGAP00                                                 | XP_021708637.1mediator of RNA polymerase II transcription subunit 12                       |
| AAEL0061f CDC42 small effector protein homolog                                  | 0.010011388705434   | 0.958612873977682  | 0.989441920233345 | NA           | NA            | ETN63571.1 CDC42 s                                                | XP_021705766.1CDC42 small effector protein homolog                                         |
| AAEL0048f cyclin G                                                              | 0.0100185940522381  | 0.931844278985248  | 0.98347583693566  | NA           | aag04068      | KXJ81212.1 hypothei                                               | XP_001649965.1cyclin G                                                                     |
| AAEL0006f mpv17-like protein 2                                                  | 0.01021430082919994 | 0.95754431201323   | 0.989441920233345 | NA           | aag04146      | NA                                                                | XP_001649766.2mpv17-like protein 2 isoform X1                                              |
| AAEL0219f NA                                                                    | 0.0102445555633395  | 0.947640797879904  | 0.987743607411212 | NA           | NA            | NA                                                                | XP_021713230.1uncharacterized protein LOC5574629                                           |
| AAEL0103f facilitated trehalose transporter Tret1-2 homolog                     | 0.010343244632884   | 0.933834213922123  | 0.98347583693566  | NA           | NA            | NA                                                                | XP_021702905.1facilitated trehalose transporter Tret1-2 homolog isoform X1                 |
| AAEL0262f NA                                                                    | 0.0104064464268637  | 0.9340240210141886 | 0.98347583693566  | NA           | aag04120      | NA                                                                | XP_021699270.1F-box/WD repeat-containing protein 7 isoform X1                              |
| AAEL0031f solute carrier family 22 member 21                                    | 0.01047677540693402 | 0.936259575289469  | 0.98424319806035  | NA           | NA            | KXJ76913.1 hypothei                                               | XP_021711550.1solute carrier family 22 member 21 isoform X1                                |
| AAEL0197f NA                                                                    | 0.0105345145417025  | 0.942027434009224  | 0.986293827255989 | NA           | NA            | NA                                                                | XP_021696112.1uncharacterized protein LOC5574095 isoform X1                                |
| AAEL0096f brahma-associated protein of 60 kDa                                   | 0.0105450417736427  | 0.95424768333406   | 0.989303184592491 | NA           | NA            | NA                                                                |                                                                                            |

|                                                                                               |                     |                    |                   |                                                 |                                |                             |                                                                                             |                                                                        |
|-----------------------------------------------------------------------------------------------|---------------------|--------------------|-------------------|-------------------------------------------------|--------------------------------|-----------------------------|---------------------------------------------------------------------------------------------|------------------------------------------------------------------------|
| AAEL02205 <sup>1</sup> NA                                                                     | 0.0124557291266357  | 0.917228504157907  | 0.979322882967209 | NA                                              | NA                             | NA                          | NA                                                                                          |                                                                        |
| AAEL00197 <sup>1</sup> WW domain-binding protein 11                                           | 0.0126537398713978  | 0.962614429061954  | 0.990492896816292 | NA                                              | aag03040                       | KXJ81252.1                  | hypothei XP_001660809.2.WW domain-binding protein 11                                        |                                                                        |
| AAEL01737 <sup>1</sup> farnesol dehydrogenase                                                 | 0.0127275586403084  | 0.932109334524716  | 0.98347583693566  | NA                                              | aag00981 <sup>1</sup> ; aag NA | NA                          | XP_011492954.2.farnesol dehydrogenase                                                       |                                                                        |
| AAEL00967 <sup>1</sup> uncharacterized LOC5572227                                             | 0.0128857821008683  | 0.944352806596136  | 0.987380357493199 | NA                                              | NA                             | NA                          | XP_001660297.2.uncharacterized protein LOC5572227                                           |                                                                        |
| AAEL01111 <sup>1</sup> polymerase delta-interacting protein 2                                 | 0.0130350896335426  | 0.903953369363168  | 0.975625018165596 | NA                                              | NA                             | KXJ70796.1                  | hypothei XP_001655117.1.polymerase delta-interacting protein 2                              |                                                                        |
| AAEL01827 <sup>1</sup> NA                                                                     | 0.0130628491363971  | 0.938188672584238  | 0.984997888194084 | NA                                              | NA                             | NA                          | XP_001648755.2.mitotic spindle assembly checkpoint protein MAD1                             |                                                                        |
| AAEL00194 <sup>1</sup> NA                                                                     | 0.0131667509153091  | 0.9335149277396306 | 0.98347583693566  | NA                                              | NA                             | NA                          | XP_001654332.2.uncharacterized protein LOC5573004                                           |                                                                        |
| AAEL02037 <sup>1</sup> NA                                                                     | 0.0133083795375091  | 0.9328462003068    | 0.98347583693566  | NA                                              | NA                             | NA                          | XP_021702619.1.BTB/POZ domain-containing protein KCTD5                                      |                                                                        |
| AAEL01295 <sup>1</sup> rho GDP-dissociation inhibitor 1                                       | 0.0135168268624173  | 0.905586617411861  | 0.975993693196454 | NA                                              | NA                             | NA                          | XP_001663181.1rho GDP-dissociation inhibitor 1 isoform X2                                   |                                                                        |
| AAEL00552 <sup>1</sup> 60S ribosomal protein L30                                              | 0.0135989025889113  | 0.927167024153682  | 0.982472473084084 | NA                                              | aag03010                       | CRK98941.1                  | CLUMA_ XP_001650291.160S ribosomal protein L30                                              |                                                                        |
| AAEL00675 <sup>1</sup> probable serine/threonine-protein kinase DDB_G0282963                  | 0.0136045737336417  | 0.897919338186192  | 0.973750254466751 | NA                                              | NA                             | XP_001862122.1              | con XP_001652180.1.probable serine/threonine-protein kinase DDB_G0282963                    |                                                                        |
| AAEL01133 <sup>1</sup> MOXD1 homolog 2                                                        | 0.0136779640348068  | 0.948885497328668  | 0.9880608919239   | NA                                              | NA                             | XP_001846760.1              | doq XP_021710974.1.MOXD1 homolog 2                                                          |                                                                        |
| AAEL01075 <sup>1</sup> WW domain-containing adapter protein with coiled-coil homolog          | 0.013725421848199   | 0.913077522016475  | 0.977561298149576 | NA                                              | NA                             | XP_019529255.1              | PRE XP_021707250.1.WW domain-containing adapter protein with coiled-coil homolog isoform X2 |                                                                        |
| AAEL00821 <sup>1</sup> myb-like protein AA                                                    | 0.0138108136584467  | 0.914415226068703  | 0.977855771096363 | NA                                              | NA                             | KXJ79411.1                  | hypothei XP_001659034.2.myb-like protein AA isoform X1                                      |                                                                        |
| AAEL02085 <sup>1</sup> NA                                                                     | 0.0138237368045926  | 0.90992642031271   | 0.97691422813284  | NA                                              | NA                             | NA                          | XP_021705657.1.MAP kinase-interacting serine/threonine-protein kinase 1                     |                                                                        |
| AAEL00555 <sup>1</sup> putative uncharacterized zinc finger protein 814                       | 0.0138524897178987  | 0.941646696812507  | 0.986119597595162 | NA                                              | NA                             | NA                          | XP_001651125.2.putative uncharacterized zinc finger protein 814                             |                                                                        |
| AAEL00211 <sup>1</sup> ero1-like protein                                                      | 0.0139421411594986  | 0.925509837606988  | 0.982258702730868 | NA                                              | aag04141                       | KXJ78916.1                  | hypothei XP_021704945.1.ero1-like protein                                                   |                                                                        |
| AAEL00801 <sup>1</sup> midnolin homolog                                                       | 0.0139788196988355  | 0.916286658783347  | 0.978701629893685 | NA                                              | NA                             | XP_001862643.1              | con XP_001658824.2.midnolin homolog                                                         |                                                                        |
| AAEL02525 <sup>1</sup> NA                                                                     | 0.014024267013818   | 0.957957784537643  | 0.989441920233345 | NA                                              | NA                             | NA                          | XP_021704562.1.uncharacterized protein LOC110677715 isoform X1                              |                                                                        |
| AAEL02383 <sup>1</sup> NA                                                                     | 0.0142236979052433  | 0.917700888935081  | 0.979587080973985 | NA                                              | NA                             | NA                          | XP_021694921.1.protein retinal degeneration B isoform X4                                    |                                                                        |
| AAEL00125 <sup>1</sup> proline-rich protein 2                                                 | 0.0143578826572022  | 0.940301494929176  | 0.985798796572901 | NA                                              | NA                             | XP_019535984.1              | PRE XP_021698467.1.proline-rich protein 2 isoform X2                                        |                                                                        |
| AAEL00411 <sup>1</sup> phosphatidylinositol transfer protein alpha isoform                    | 0.0144471393836978  | 0.894620504782315  | 0.972739913152176 | NA                                              | NA                             | XP_001851402.1              | phc XP_001648499.1.phosphatidylinositol transfer protein alpha isoform isoform X1           |                                                                        |
| AAEL02244 <sup>1</sup> NA                                                                     | 0.0145587230381399  | 0.945445891927191  | 0.987398323447749 | NA                                              | NA                             | NA                          | XP_019525045.1.proteoglycan 4                                                               |                                                                        |
| AAEL00341 <sup>1</sup> NA                                                                     | 0.0146429166589248  | 0.90971904962584   | 0.97691422813284  | NA                                              | aag04214                       | XP_001851487.1              | lam XP_021710074.1.lamin Dm0                                                                |                                                                        |
| AAEL01385 <sup>1</sup> alpha-1,3-mannosyl-glycoprotein 4-beta-N-acetylglucosaminyltransferase | 0.0146641933025702  | 0.930127142157109  | 0.98347583693566  | NA                                              | aag01100 <sup>1</sup> ; aag NA | XP_001664101.2              | alpha-1,3-mannosyl-glycoprotein 4-beta-N-acetylglucosaminyltransferase B                    |                                                                        |
| AAEL02805 <sup>1</sup> NA                                                                     | 0.014680604934022   | 0.911964087754456  | 0.977278855888727 | NA                                              | NA                             | NA                          | XP_021693078.1.fibroblast growth factor receptor homolog 1 isoform X2                       |                                                                        |
| AAEL01987 <sup>1</sup> NA                                                                     | 0.0147232172807157  | 0.9746776712024    | 0.993683129891922 | NA                                              | 230                            | NA                          | NA                                                                                          |                                                                        |
| AAEL01365 <sup>1</sup> acyl-CoA dehydrogenase family member 9, mitochondrial                  | 0.01473717770879413 | 0.931087543594413  | 0.98347583693566  | NA                                              | NA                             | NA                          | XP_001663840.2.acyl-CoA dehydrogenase family member 9, mitochondrial                        |                                                                        |
| AAEL01476 <sup>1</sup> NA                                                                     | 0.0147327708581352  | 0.956883769244559  | 0.989441920233345 | NA                                              | NA                             | NA                          | XP_001649580.2.uncharacterized protein LOC5565239                                           |                                                                        |
| AAEL00025 <sup>1</sup> protein crossbronx homolog                                             | 0.0147958521295842  | 0.936432210282369  | 0.98424319806035  | NA                                              | NA                             | KXJ81839.1                  | hypothei XP_001654780.2.protein crossbronx homolog                                          |                                                                        |
| AAEL02215 <sup>1</sup> NA                                                                     | 0.0148670446588493  | 0.9320015580080935 | 0.98347583693566  | NA                                              | aag03010                       | NA                          | XP_021705245.1.39S ribosomal protein L35, mitochondrial                                     |                                                                        |
| AAEL00485 <sup>1</sup> uncharacterized LOC5565610                                             | 0.0148785934221415  | 0.966527709013635  | 0.991210985301503 | NA                                              | NA                             | XP_001867639.1              | ada XP_021693782.1.uncharacterized protein LOC5565610                                       |                                                                        |
| AAEL01981 <sup>1</sup> NA                                                                     | 0.0149025302137077  | 0.920410704261639  | 0.980340877547081 | NA                                              | NA                             | NA                          | XP_021700487.1.probable phospholipid-transporting ATPase VD isoform X1                      |                                                                        |
| AAEL01165 <sup>1</sup> uncharacterized LOC5575101                                             | 0.0150483236195519  | 0.896299806494921  | 0.973419069671699 | NA                                              | aag03015                       | KXJ76008.1                  | hypothei XP_021705928.1.uncharacterized protein LOC5575101 isoform X2                       |                                                                        |
| AAEL01955 <sup>1</sup> NA                                                                     | 0.01521232385103638 | 0.900285661898286  | 0.974065297962641 | NA                                              | NA                             | NA                          | XP_021693430.1.glutamyl aminopeptidase isoform X2                                           |                                                                        |
| AAEL01305 <sup>1</sup> serine/threonine-protein phosphatase PP2A                              | 0.0152318462847442  | 0.889932144933226  | 0.972006599130629 | 04660 <sup>1</sup> ; 04658                      | aag04013 <sup>1</sup> ; aag NA | XP_001663281.1              | serine/threonine-protein phosphatase PP2A                                                   |                                                                        |
| AAEL00411 <sup>1</sup> tubulin alpha-8 chain                                                  | 0.0153102465637831  | 0.953552200834388  | 0.989303184592491 | NA                                              | NA                             | KXJ77464.1                  | hypothei XP_021698338.1.tubulin alpha-8 chain                                               |                                                                        |
| AAEL01705 <sup>1</sup> tyrosine 3-monoxygenase                                                | 0.0153413986867828  | 0.887960963865328  | 0.970996238637524 | 00350 <sup>1</sup> ; 00950 <sup>1</sup> ; 00790 | aag01100 <sup>1</sup> ; aag NA | XP_011493493.2              | tyrosine 3-monoxygenase isoform X1                                                          |                                                                        |
| AAEL02415 <sup>1</sup> NA                                                                     | 0.0154069958753802  | 0.941465977345086  | 0.986042559017697 | NA                                              | NA                             | NA                          | XP_021702255.1.thiamine transporter 1-like                                                  |                                                                        |
| AAEL02275 <sup>1</sup> NA                                                                     | 0.0154280405222678  | 0.951832963529483  | 0.988479552477666 | NA                                              | NA                             | NA                          | XP_001649156.2.uncharacterized protein LOC5564808                                           |                                                                        |
| AAEL00945 <sup>1</sup> coactosin-like protein                                                 | 0.0154996203180068  | 0.925687821613243  | 0.982258702730868 | NA                                              | NA                             | NA                          | XP_001660081.1.coactosin-like protein                                                       |                                                                        |
| AAEL00815 <sup>1</sup> ribosomal protein S6 kinase delta-1                                    | 0.015528527146072   | 0.953628758033952  | 0.989303184592491 | NA                                              | NA                             | KXJ77460.1                  | hypothei XP_021710073.1.ribosomal protein S6 kinase delta-1                                 |                                                                        |
| AAEL00441 <sup>1</sup> putative pre-mRNA-splicing factor ATP-dependent RNA helicase PRP1      | 0.0156982192371071  | 0.884860610943521  | 0.970521528629931 | NA                                              | aag03040                       | ETN60552.1                  | ATP-dep XP_001649136.1.putative pre-mRNA-splicing factor ATP-dependent RNA helicase PRP1    |                                                                        |
| AAEL00145 <sup>1</sup> 39S ribosomal protein L22, mitochondrial                               | 0.0158344736093546  | 0.922567582233514  | 0.981343310857761 | NA                                              | aag03010                       | KXJ69404.1                  | hypothei XP_001659205.1.39S ribosomal protein L22, mitochondrial                            |                                                                        |
| AAEL01177 <sup>1</sup> RYamide neuropeptides                                                  | 0.0158649672562709  | 0.9561546098636    | 0.989441920233345 | NA                                              | NA                             | XP_001850615.1              | con XP_001655654.1.RYamide neuropeptides                                                    |                                                                        |
| AAEL00405 <sup>1</sup> importin-11                                                            | 0.0158765795017456  | 0.923215224070738  | 0.981343310857761 | NA                                              | NA                             | KXJ72128.1                  | hypothei XP_019531657.1.importin-11-like                                                    |                                                                        |
| AAEL00045 <sup>1</sup> SPRY domain-containing protein 7                                       | 0.0160006118969413  | 0.940198811393057  | 0.985798796572901 | NA                                              | NA                             | KXJ82402.1                  | hypothei XP_001656971.1.SPRY domain-containing protein 7                                    |                                                                        |
| AAEL00861 <sup>1</sup> stress-activated protein kinase JNK                                    | 0.0160191044748461  | 0.882589319352336  | 0.970357617045106 | NA                                              | 4150                           | aag04141 <sup>1</sup> ; aag | KXJ81744.1                                                                                  | hypothei XP_021703776.1.stress-activated protein kinase JNK isoform X1 |
| AAEL00121 <sup>1</sup> bromodomain-containing protein 3                                       | 0.0160269986588696  | 0.88769555572744   | 0.970996238637524 | NA                                              | NA                             | XP_001654740.2              | homeotic protein female sterile isoform X1                                                  |                                                                        |
| AAEL00921 <sup>1</sup> 28S ribosomal protein S35, mitochondrial                               | 0.016046696578123   | 0.912246472870579  | 0.97729628048831  | NA                                              | NA                             | NA                          | XP_001659845.2.28S ribosomal protein S35, mitochondrial                                     |                                                                        |
| AAEL01177 <sup>1</sup> NA                                                                     | 0.0161131335891216  | 0.911942027741369  | 0.977278855888727 | NA                                              | aag01100 <sup>1</sup> ; aag    | XP_001688291.2              | AG_ XP_021694851.1.mannosyl-oligosaccharide alpha-1,2-mannosidase IA isoform X1             |                                                                        |
| AAEL00041 <sup>1</sup> mucin-17                                                               | 0.0161422638175239  | 0.94805850547657   | 0.987881609350457 | NA                                              | NA                             | KXJ84209.1                  | hypothei XP_019558266.1.mucin-17-like isoform X1                                            |                                                                        |
| AAEL00875 <sup>1</sup> transmembrane protein 164                                              | 0.0162038006022266  | 0.92681013867498   | 0.982472473084084 | NA                                              | NA                             | ETN66894.1                  | transme XP_001659460.1.transmembrane protein 164                                            |                                                                        |
| AAEL00905 <sup>1</sup> importin-7                                                             | 0.0162623397916212  | 0.9289287          |                   |                                                 |                                |                             |                                                                                             |                                                                        |

|                                                                                   |                     |                    |                   |                     |               |                      |                                                                                                     |                                                              |
|-----------------------------------------------------------------------------------|---------------------|--------------------|-------------------|---------------------|---------------|----------------------|-----------------------------------------------------------------------------------------------------|--------------------------------------------------------------|
| AAEL02715 NA                                                                      | 0.0175316376726673  | 0.87965270880171   | 0.969652664055335 | NA                  | NA            | NA                   | XP_021694695.1solute carrier family 35 member E1 homolog                                            |                                                              |
| AAEL01321 histone-lysine N-methyltransferase E(z)                                 | 0.017638431340194   | 0.933758350875177  | 0.98347583693566  |                     | 310           | aag01100; aag NA     | XP_001663394.2histone-lysine N-methyltransferase E(z) isoform X2                                    |                                                              |
| AAEL00351 bromodomain-containing protein DDB_G0270170                             | 0.0176845668069143  | 0.910812061379495  | 0.976946997335368 | NA                  | NA            | KXJ68806.1 hypothe   | XP_021711621.1bromodomain-containing protein DDB_G0270170                                           |                                                              |
| AAEL01261 ATP-binding cassette sub-family A member 3                              | 0.0177312932102936  | 0.89858134937992   | 0.973780616635202 | NA                  | NA            | KXJ71644.1 hypothe   | XP_021697250.1ATP-binding cassette sub-family A member 3                                            |                                                              |
| AAEL00701 mitochondrial import receptor subunit TOM40 homolog 1                   | 0.0177487556851487  | 0.886700491616068  | 0.9709344693273   | NA                  | NA            | ETN59300.1 mitocho   | XP_021705463.1mitochondrial import receptor subunit TOM40 homolog 1                                 |                                                              |
| AAEL00231 protein FRA10AC1 homolog                                                | 0.0177654777351553  | 0.959010996897101  | 0.989441920233345 | NA                  | NA            | KXJ68064.1 hypothe   | XP_021708031.1protein FRA10AC1 homolog                                                              |                                                              |
| AAEL00781 mitosis initiation protein fs1(y)a                                      | 0.0177818023255514  | 0.910363054425336  | 0.97691422813284  | NA                  | NA            | KXJ69055.1 hypothe   | XP_001652912.1mitosis initiation protein fs1(y)a                                                    |                                                              |
| AAEL00771 uncharacterized LOC5569577                                              | 0.0178347740907666  | 0.890622594337468  | 0.972290999904304 | NA                  | NA            | KFB40964.1 hypothe   | XP_001658640.1uncharacterized protein LOC5569577                                                    |                                                              |
| AAEL01981 NA                                                                      | 0.0178852354102987  | 0.883606875745376  | 0.970521528629931 | NA                  | aag03018      | NA                   | XP_021708017.1non-canonical poly(A) RNA polymerase protein Trf4-1 isoform X1                        |                                                              |
| AAEL01339 chromatin assembly factor 1 subunit B                                   | 0.0179442486754582  | 0.959470521107241  | 0.989441920233345 | NA                  | NA            | NA                   | XP_001664137.1chromatin assembly factor 1 subunit B                                                 |                                                              |
| AAEL00391 ubiquitin-like protein 4A-8                                             | 0.0179564834389075  | 0.905257227400665  | 0.975993693196454 | NA                  | NA            | KXJ73366.1 hypothe   | XP_001648001.1ubiquitin-like protein 4A-8                                                           |                                                              |
| AAEL02411 NA                                                                      | 0.0179623380921456  | 0.923348717477082  | 0.981343310857761 | NA                  | NA            | NA                   | XP_021697895.1acyl-coenzyme A thioesterase 13-like                                                  |                                                              |
| AAEL01981 NA                                                                      | 0.0179883483623354  | 0.898725690774843  | 0.973780616635202 | NA                  | aag04150      | NA                   | XP_021702015.1 restin homolog                                                                       |                                                              |
| AAEL01971 NA                                                                      | 0.0180178123086702  | 0.891290759646343  | 0.972336404299425 | NA                  | NA            | NA                   | XP_021708169.1phosphate carrier protein, mitochondrial                                              |                                                              |
| AAEL00961 receptor expression-enhancing protein 5                                 | 0.018195922786386   | 0.869344162917209  | 0.968652831735134 | NA                  | NA            | NA                   | XP_011493497.1receptor expression-enhancing protein 5 isoform X2                                    |                                                              |
| AAEL00031 B-cell receptor-associated protein 31                                   | 0.0182630315825236  | 0.865118158679846  | 0.967527624717057 | NA                  | aag04141      | NA                   | XP_001656332.2B-cell receptor-associated protein 31 isoform X3                                      |                                                              |
| AAEL01471 ras-related protein Ral-a                                               | 0.0182836126678072  | 0.894192448664316  | 0.972739913152176 | NA                  | NA            | NA                   | XP_019558957.1 ras-related protein Ral-a-like isoform X2                                            |                                                              |
| AAEL01951 NA                                                                      | 0.0184312126875651  | 0.926111335024235  | 0.982258702730868 | NA                  | NA            | NA                   | XP_021704743.1protein timeless homolog                                                              |                                                              |
| AAEL00541 putative uncharacterized protein DDB_G0285119                           | 0.0184599052661654  | 0.978310322878755  | 0.994190331004269 | NA                  | NA            | NA                   | XP_021696155.1putative uncharacterized protein DDB_G0293878 isoform X4                              |                                                              |
| AAEL01381 acyl-CoA-binding protein                                                | 0.01847773340590835 | 0.87348280318859   | 0.969652664055335 | NA                  | NA            | NA                   | XP_021694733.1acyl-CoA-binding protein                                                              |                                                              |
| AAEL01131 116 kDa US small nuclear ribonucleoprotein component                    | 0.0184945282480106  | 0.922876769929856  | 0.981343310857761 | NA                  | aag03040      | KFB37716.1 hypothe   | XP_001655314.1116 kDa US small nuclear ribonucleoprotein component                                  |                                                              |
| AAEL01001 uncharacterized LOC5572850                                              | 0.018807759235547   | 0.934357292856979  | 0.98347583693566  |                     | NA            | NA                   | XP_021705523.1uncharacterized protein LOC5572850                                                    |                                                              |
| AAEL01171 succinate-CoA ligase [ADP-forming] subunit beta, mitochondrial          | 0.0188426162422308  | 0.883451249040914  | 0.970521528629931 | 00640; 00720; 00660 | aag01100; aag | XP_001661866.1 suc   | XP_001661866.1succinate-CoA ligase [ADP-forming] subunit beta, mitochondrial isoform X2             |                                                              |
| AAEL00281 uncharacterized protein KIAA1683 homolog                                | 0.0188505861148897  | 0.882067201946736  | 0.970357617045106 | NA                  | NA            | ETN67463.1 hypothe   | EAT45974.1AAEL002817                                                                                |                                                              |
| AAEL01311 group XV phospholipase A2                                               | 0.0188662781920644  | 0.890409754629324  | 0.972290999904304 | NA                  | aag04142; aag | NA                   | XP_001663352.2group XV phospholipase A2                                                             |                                                              |
| AAEL00241 endoplasmic reticulum metalloproteinase 1                               | 0.0189300529631585  | 0.927651024663702  | 0.982649508778163 | NA                  | NA            | KXJ82850.1 hypothe   | XP_001655226.2endoplasmic reticulum metalloproteinase 1                                             |                                                              |
| AAEL00851 protein spaetzle 3                                                      | 0.0189372266645705  | 0.889694148215971  | 0.97177389514825  | NA                  | NA            | KXJ75686.1 hypothe   | XP_021702207.1protein spaetzle 3                                                                    |                                                              |
| AAEL00011 eukaryotic translation initiation factor 5                              | 0.0189540388353492  | 0.86831295811267   | 0.96863134437578  | NA                  | aag03013; aag | KFB44785.1 AGAP01    | XP_001658942.1eukaryotic translation initiation factor 5                                            |                                                              |
| AAEL00751 electron transfer flavoprotein-ubiquinone oxidoreductase, mitochondrial | 0.0190302911612374  | 0.857332607894857  | 0.964980728557884 | NA                  | NA            | KXJ77724.1 hypothe   | XP_021699682.1electron transfer flavoprotein-ubiquinone oxidoreductase, mitochondrial               |                                                              |
| AAEL00831 peptidyl-prolyl cis-trans isomerase FKBP2                               | 0.0191806365305047  | 0.880190035085222  | 0.969652664055335 | NA                  | NA            | ETN61115.1 FK506-b   | XP_001653210.1peptidyl-prolyl cis-trans isomerase FKBP2                                             |                                                              |
| AAEL01411 melanization protease 1                                                 | 0.0191885945634133  | 0.911165348112893  | 0.976991789015945 | NA                  | NA            | NA                   | XP_001648090.1melanization protease 1                                                               |                                                              |
| AAEL00931 synaptic functional regulator FMR1                                      | 0.0193474960412249  | 0.866558560797657  | 0.968074250389273 | NA                  | aag03013      | NA                   | XP_021709946.1synaptic functional regulator FMR1 isoform X5                                         |                                                              |
| AAEL02581 NA                                                                      | 0.0193566468936258  | 0.85747712167818   | 0.964980728557884 | NA                  | NA            | NA                   | XP_019552691.1 lysozyme-like                                                                        |                                                              |
| AAEL01171 alpha-soluble NSF attachment protein                                    | 0.0194774998492652  | 0.955901855083855  | 0.964980728557884 | NA                  | NA            | KFB35002.1 AGAP00    | XP_001661903.1alpha-soluble NSF attachment protein                                                  |                                                              |
| AAEL00211 ribonuclease P protein subunit p40                                      | 0.0196663617290289  | 0.878326875654576  | 0.969652664055335 | NA                  | aag03013; aag | KXJ69691.1 hypothe   | XP_001654809.1ribonuclease P protein subunit p40 isoform X2                                         |                                                              |
| AAEL02221 NA                                                                      | 0.0197558518093921  | 0.951587105641683  | 0.988479552477666 | NA                  | aag04142      | NA                   | XP_021713253.1sulfatase-modifying factor 1 isoform X1                                               |                                                              |
| AAEL00341 cullin-4A                                                               | 0.0198533399434377  | 0.854841178385688  | 0.964980728557884 | NA                  | aag04120; aag | ETN61630.1 cullin [A | XP_019539059.1 cullin-4A                                                                            |                                                              |
| AAEL00491 probable cytochrome P450 6g2                                            | 0.0200194394548203  | 0.857801413493762  | 0.964980728557884 | NA                  | NA            | KXJ70812.1 hypothe   | XP_001650095.3probable cytochrome P450 6g2 isoform X2                                               |                                                              |
| AAEL01971 NA                                                                      | 0.0200976316330512  | 0.926933007931972  | 0.982472473084084 | 00562; 04070        | aag01100; aag | NA                   | XP_021702740.11-phosphatidylinositol 4,5-bisphosphate phosphodiesterase classes I and II isoform X1 |                                                              |
| AAEL00401 28S ribosomal protein S14, mitochondrial                                | 0.0201154601000072  | 0.869266148694336  | 0.968652831735134 | NA                  | aag03010      | KFB35490.1 AGAP00    | XP_001648358.128S ribosomal protein S14, mitochondrial                                              |                                                              |
| AAEL01061 dymeclin                                                                | 0.0201459450353179  | 0.872549339053397  | 0.969029518523332 | NA                  | NA            | KXJ73999.1 hypothe   | XP_001661020.1dymeclin isoform X2                                                                   |                                                              |
| AAEL02531 NA                                                                      | 0.020190183097368   | 0.907641758847134  | 0.976056966800435 |                     | NA            | NA                   | NA                                                                                                  |                                                              |
| AAEL00981 PP2C-like domain-containing protein CG9801                              | 0.0202223823280896  | 0.907250184737345  | 0.976056966800435 | 04660; 04658        | NA            | NA                   | XP_001660435.1PP2C-like domain-containing protein CG9801                                            |                                                              |
| AAEL01161 probable asparagine-tRNA ligase, mitochondrial                          | 0.0202704798080724  | 0.9441122980948316 | 0.986042559017697 |                     | 970           | aag00970             | KXJ71003.1 hypothe                                                                                  | XP_001661824.1probable asparagine-tRNA ligase, mitochondrial |
| AAEL01371 DNA-directed RNA polymerase II subunit RPB11                            | 0.0202831390006236  | 0.910911240723479  | 0.976946997335368 | NA                  | aag03020      | NA                   | XP_019547096.1 DNA-directed RNA polymerase II subunit RPB11                                         |                                                              |
| AAEL00151 protein FAM91A1                                                         | 0.020319239272703   | 0.887951926091645  | 0.970996238637524 | NA                  | NA            | KXJ74219.1 hypothe   | XP_001653556.1protein FAM91A1                                                                       |                                                              |
| AAEL00761 histidine-rich glycoprotein                                             | 0.0204593166388603  | 0.850778532777888  | 0.964536838405106 | NA                  | aag04350      | KFB3886.1 AGAP00     | XP_001658559.1histidine-rich glycoprotein                                                           |                                                              |
| AAEL00821 segment polarity protein dishevelled                                    | 0.0205798045748295  | 0.906721200620858  | 0.975993693196454 | NA                  | aag04150; aag | XP_019545266.1 PRE   | XP_021709135.1segment polarity protein dishevelled isoform X4                                       |                                                              |
| AAEL02081 NA                                                                      | 0.0205805626283664  | 0.84958665556956   | 0.96410141039032  | NA                  | NA            | NA                   | XP_021707527.1E3 ubiquitin-protein ligase UBR1                                                      |                                                              |
| AAEL00441 probable ATP-dependent RNA helicase DDX56                               | 0.0206469695053776  | 0.848111900208511  | 0.963435772275933 | NA                  | NA            | CRK92134.1 CLUMA     | XP_021704882.1probable ATP-dependent RNA helicase DDX56                                             |                                                              |
| AAEL00591 adenine phosphoribosyltransferase                                       | 0.0206684699068881  | 0.864033042679083  | 0.967038506393142 |                     | 230           | aag01100; aag        | KXJ83185.1 hypothe                                                                                  | XP_001664324.1adenine phosphoribosyltransferase              |
| AAEL00161 dual specificity mitogen-activated protein kinase kinase 3              | 0.0207729111251911  | 0.869478528922037  | 0.968652831735134 | NA                  | aag04013; aag | XP_019563137.1 PRE   | XP_001659756.2dual specificity mitogen-activated protein kinase kinase 3 isoform X1                 |                                                              |
| AAEL00261 general odorant-binding protein 56d                                     | 0.0207938225165663  | 0.942502068052677  | 0.986630408149377 | NA                  | NA            | XP_001863133.1 odc   | XP_001655721.2general odorant-binding protein 56d                                                   |                                                              |
| AAEL00361 gastrula zinc finger protein XICGF26.1                                  | 0.0210241037567567  | 0.959010996937038  | 0.989441920233345 | NA                  | NA            |                      |                                                                                                     |                                                              |

|                                                                                   |                     |                    |                   |                       |                           |                                                                                                                                        |
|-----------------------------------------------------------------------------------|---------------------|--------------------|-------------------|-----------------------|---------------------------|----------------------------------------------------------------------------------------------------------------------------------------|
| AAEL0027f dihydrolipoyllysine-residue succinyltransferase component of 2-oxogluta | 0.02290022468224779 | 0.854123158933053  | 0.964756573145985 | 00310 ; 00020 ; 00380 | aag01100 ; aag_KXJ77740.1 | hypotheI_XP_011493660.2dihydrolipoyllysine-residue succinyltransferase component of 2-oxoglutarate dehydrogenase complex mitochondrial |
| AAEL0050f 5-phase kinase-associated protein 2                                     | 0.0229309082342036  | 0.89542042181945   | 0.973074772918953 | NA                    | aag04120 ; aag_KXJ83935.1 | hypotheI_XP_001650323.15-phase kinase-associated protein 2                                                                             |
| AAEL0077f cytochrome c oxidase subunit 7A, mitochondrial                          | 0.0229340333909732  | 0.848687427051424  | 0.963483240428003 | NA                    | aag01100 ; aag_KFB49000.1 | AGAP00_XP_001658629.1cytochrome c oxidase subunit 7A, mitochondrial                                                                    |
| AAEL0025f glutamate receptor ionotropic, kainate 2                                | 0.0229854441195125  | 0.847099719115806  | 0.963198678766584 | NA                    | NA                        | XP_019526260.1 PRE_XP_001655464.2glutamate receptor ionotropic, kainate 2                                                              |
| AAEL0072f zinc finger protein 2 homolog                                           | 0.0230321723474647  | 0.925592863233139  | 0.98258702730868  | NA                    | NA                        | KXJ76944.1 hypotheI_XP_001652629.1zinc finger protein 2 homolog                                                                        |
| AAEL0094f protein peste                                                           | 0.0230755921813219  | 0.90098868532653   | 0.974252903247646 | NA                    | NA                        | XP_001660043.1protein peste                                                                                                            |
| AAEL0199f NA                                                                      | 0.0231591950456089  | 0.899475087571332  | 0.97393667311859  | NA                    | NA                        | XP_019564505.1 homeotic protein female sterile                                                                                         |
| AAEL0136f ras-related protein Rab-35                                              | 0.0232361687868635  | 0.8760776070845    | 0.969652664055335 | NA                    | NA                        | XP_001656883.2ras-related protein Rab-35 isoform X1                                                                                    |
| AAEL0066f 60S ribosomal protein L31                                               | 0.023237244933903   | 0.872930974091448  | 0.969029518523332 | NA                    | aag03010                  | AAV90720.1 60S ribc_XP_001657955.160S ribosomal protein L31                                                                            |
| AAEL0121f aminopeptidase N                                                        | 0.02325874482541    | 0.841527382450045  | 0.963198678766584 | NA                    | NA                        | KXJ78002.1 hypotheI_XP_001655856.2aminopeptidase N isoform X1                                                                          |
| AAEL0044f zinc finger CCHC domain-containing protein 4                            | 0.0232694580141983  | 0.93666081050784   | 0.984371034524114 | NA                    | NA                        | XP_005186567.1 PRE_XP_001649112.1zinc finger CCHC domain-containing protein 4                                                          |
| AAEL0075f dual oxidase maturation factor 1                                        | 0.0233322339612165  | 0.908933766425247  | 0.97687556954581  | NA                    | NA                        | ETN58938.1 moladie_XP_001658405.1dual oxidase maturation factor 1                                                                      |
| AAEL0272f NA                                                                      | 0.0234277600768474  | 0.934522334555257  | 0.98347583693566  | NA                    | NA                        | XP_021694845.1alpha-ketoglutarate-dependent dioxygenase alkB homolog 7, mitochondrial                                                  |
| AAEL0034f leucine-rich repeat neuronal protein 2                                  | 0.023437515303133   | 0.946930456176613  | 0.987707093985696 | NA                    | NA                        | KXJ69248.1 hypotheI_XP_021711247.1leucine-rich repeat neuronal protein 2                                                               |
| AAEL0028f B-cell CLL/lymphoma 7 protein family member B-B                         | 0.0234956240318785  | 0.857519791349169  | 0.964980728557884 | NA                    | NA                        | KFB36773.1 AGAP00_XP_021700479.1B-cell CLL/lymphoma 7 protein family member B-B                                                        |
| AAEL0113f 39S ribosomal protein L9, mitochondrial                                 | 0.0235742032827274  | 0.871326496954978  | 0.969029518523332 | NA                    | aag03010                  | KXJ71322.1 hypotheI_XP_001655318.139S ribosomal protein L9, mitochondrial                                                              |
| AAEL0275f NA                                                                      | 0.0240417333879983  | 0.83349000747389   | 0.959902797120062 | 62                    | aag01100 ; aag_NA         | XP_021706249.1very-long-chain (3R)-3-hydroxyacyl-CoA dehydratase 2 isoform X2                                                          |
| AAEL0015f cytosolic non-specific dipeptidase                                      | 0.0240421716349907  | 0.846975720651098  | 0.963198678766584 | NA                    | aag01100 ; aag_ETN61410.1 | glutama_XP_001653563.1cytosolic non-specific dipeptidase                                                                               |
| AAEL0121f glutaminy-peptide cyclotransferase                                      | 0.0240544230511349  | 0.886685784286906  | 0.9709344693273   | NA                    | NA                        | KXJ76435.1 hypotheI_XP_001662292.2glutaminy-peptide cyclotransferase                                                                   |
| AAEL0025f zinc finger protein 62                                                  | 0.0241564861370458  | 0.921824526485273  | 0.981104475215994 | NA                    | NA                        | KXJ70567.1 hypotheI_XP_021697749.1zinc finger protein 62                                                                               |
| AAEL0170f NA                                                                      | 0.0241806216568195  | 0.9139192171038789 | 0.97782847426146  | NA                    | NA                        | XP_021701735.1zinc finger protein X1 isoform X1                                                                                        |
| AAEL0117f NF-kappa-B-repressing factor                                            | 0.0243419359245824  | 0.884723529728128  | 0.970521528629931 | NA                    | NA                        | KXJ72931.1 hypotheI_XP_001661884.1NF-kappa-B-repressing factor                                                                         |
| AAEL0094f protein split ends                                                      | 0.0244544020407161  | 0.859648363373082  | 0.965722450478577 | NA                    | NA                        | XP_021700435.1protein split ends isoform X6                                                                                            |
| AAEL0194f NA                                                                      | 0.024471929721428   | 0.94613268933297   | 0.987558190476633 | NA                    | NA                        | XP_021697076.1breast cancer anti-estrogen resistance protein 1 isoform X2                                                              |
| AAEL0024f endoplasmic reticulum metalloptidase 1                                  | 0.0245066174869611  | 0.835856949077433  | 0.962348963212321 | NA                    | NA                        | XP_001864515.1 con_XP_001655228.2endoplasmic reticulum metalloptidase 1                                                                |
| AAEL0081f biogenesis of lysosome-related organelles complex 1 subunit 1           | 0.0245092662264071  | 0.926824961771956  | 0.982472734084084 | NA                    | NA                        | ETN58392.1 RT14 pri_XP_001658991.1biogenesis of lysosome-related organelles complex 1 subunit 1                                        |
| AAEL0083f tudor domain-containing protein 3                                       | 0.0245514785461037  | 0.877423468011749  | 0.969652664055335 | NA                    | NA                        | KXJ75960.1 hypotheI_XP_021704717.1tudor domain-containing protein 3                                                                    |
| AAEL0053f NA                                                                      | 0.0246019128170274  | 0.817818054304281  | 0.952514760254484 | NA                    | NA                        | ETN58760.1 hypothe_XP_021696745.1uncharacterized protein LOC5566341                                                                    |
| AAEL0237f NA                                                                      | 0.0246106580932731  | 0.932937063590419  | 0.98347583693566  | NA                    | NA                        | XP_021703189.1leucine-rich repeat-containing protein 40-like                                                                           |
| AAEL0083f serine protease inhibitor 88Ea                                          | 0.0247210876980765  | 0.830319015949639  | 0.958428949419039 | NA                    | NA                        | KXJ75722.1 hypotheI_XP_021704939.1serine protease inhibitor 88Ea isoform X1                                                            |
| AAEL0013f coiled-coil domain-containing protein 6                                 | 0.0247243554039563  | 0.840547120713899  | 0.963198678766584 | NA                    | NA                        | XP_001843899.1 con_XP_001653153.1coiled-coil domain-containing protein 6                                                               |
| AAEL0106f ribonucleoside-diphosphate reductase subunit M2                         | 0.0248023442725     |                    |                   |                       |                           |                                                                                                                                        |

|                                                                                 |                    |                    |                   |                         |                    |                                                                      |                                                                                     |
|---------------------------------------------------------------------------------|--------------------|--------------------|-------------------|-------------------------|--------------------|----------------------------------------------------------------------|-------------------------------------------------------------------------------------|
| AAEL02141 NA                                                                    | 0.0281322541094555 | 0.956662532278838  | 0.989441920233345 | NA                      | NA                 | NA                                                                   | XP_021692952.1tail-anchored protein insertion receptor WRB                          |
| AAEL0071: protein PET117 homolog, mitochondrial                                 | 0.0281758504237563 | 0.885495098178884  | 0.97078973835142  | NA                      | NA                 | XP_001849747.1 PET r                                                 | XP_001658150.2protein PET117 homolog, mitochondrial                                 |
| AAEL1404: probable tRNA (uracil-O(2))-methyltransferase                         | 0.0282141999766504 | 0.940689675340187  | 0.986015080587812 | NA                      | NA                 | NA                                                                   | XP_021697833.1probable tRNA (uracil-O(2))-methyltransferase                         |
| AAEL0025: uncharacterized LOC5580174                                            | 0.0282219357202599 | 0.870217775791867  | 0.968756831942506 | NA                      | NA                 | KXJ72380.1 hypothei                                                  | XP_001655579.2uncharacterized protein LOC5580174                                    |
| AAEL0081: fumarate hydratase, mitochondrial                                     | 0.0282552011256005 | 0.825130415423104  | 0.955377826472606 | 00020 ; 00720 ; 00620   | aag01100 ; aag     | KXJ84062.1 hypothei                                                  | XP_001658987.1fumarate hydratase, mitochondrial isoform X1                          |
| AAEL0222: NA                                                                    | 0.0282859957635009 | 0.939945322382211  | 0.985798796572901 | NA                      | NA                 | NA                                                                   | XP_021694015.1uncharacterized protein LOC5565165                                    |
| AAEL0113: mitochondrial cardiolipin hydrolase                                   | 0.0283375004162446 | 0.929829965206945  | 0.98347583693566  | NA                      | NA                 | KXJ79673.1 hypothei                                                  | XP_021708813.1mitochondrial cardiolipin hydrolase                                   |
| AAEL0088: carbonic anhydrase 2                                                  | 0.0284279703985021 | 0.870015940029942  | 0.968652831735134 | NA                      | aag01100 ; aag     | KFB39570.1 AGAP00                                                    | XP_001659576.1carbonic anhydrase 2                                                  |
| AAEL0276: NA                                                                    | 0.0285007890324877 | 0.8727289573894066 | 0.969652664055335 | NA                      | NA                 | NA                                                                   | XP_001659733.2zinc finger CCHC domain-containing protein 8 homolog                  |
| AAEL0039: ubiquitin conjugation factor E4 A                                     | 0.0286874428085578 | 0.822790530683396  | 0.954452060294489 | NA                      | aag04120           | KXJ80153.1 hypothei                                                  | XP_021693240.1ubiquitin conjugation factor E4 A                                     |
| AAEL0147: zinc transporter ZIP13 homolog                                        | 0.0287584351256577 | 0.813222273792987  | 0.950739596422699 | NA                      | NA                 | NA                                                                   | XP_021713167.1zinc transporter ZIP13 homolog                                        |
| AAEL0072: dynamin                                                               | 0.0287863920216287 | 0.81293563649456   | 0.950525134284999 | NA                      | aag04144           | XP_019546242.1 PRE                                                   | XP_001652669.1dynamin isoform X2                                                    |
| AAEL0059: splicing factor 3B subunit 6-like protein                             | 0.0288195255457596 | 0.890564893987172  | 0.972299099904304 | NA                      | aag03040           | ETN67867.1 pre-mRf                                                   | XP_001651583.1splicing factor 3B subunit 6-like protein                             |
| AAEL0030: uncharacterized LOC576894                                             | 0.0288901998194057 | 0.811329290544954  | 0.95010454605765  | NA                      | aag04142           | XP_001864689.1 sap                                                   | XP_021703285.1uncharacterized protein LOC5576894                                    |
| AAEL0020: chitinase-like protein Idgf4                                          | 0.0288915045140711 | 0.800575891728655  | 0.946215055875588 | NA                      | NA                 | XP_001844673.1 ima                                                   | XP_001660748.2chitinase-like protein Idgf4                                          |
| AAEL0092: longitudinals lacking protein, isoforms A/B/D/L                       | 0.0290440576877935 | 0.803255270277697  | 0.94649029363412  | NA                      | NA                 | NA                                                                   | XP_001659825.1longitudinals lacking protein, isoforms H/M/V isoform X12             |
| AAEL0014: uncharacterized protein PB18E9.04c                                    | 0.0290447402981128 | 0.937083811118422  | 0.984590686219652 | NA                      | NA                 | KXJ70366.1 hypothei                                                  | XP_001653389.1uncharacterized protein PB18E9.04c                                    |
| AAEL0252: NA                                                                    | 0.0290991704676896 | 0.919994505566599  | 0.980340877547081 | NA                      | NA                 | NA                                                                   | XP_021693241.1leucine-rich repeat-containing protein 24                             |
| AAEL0106: trifunctional purine biosynthetic protein adenosine-3                 | 0.0291167770096504 | 0.850557470381841  | 0.964536838405106 | 00230 ; 00970 ; 00670 ; | aag01100 ; aag     | KXJ68564.1 hypothei                                                  | XP_001660978.1trifunctional purine biosynthetic protein adenosine-3                 |
| AAEL0266: NA                                                                    | 0.0291288315547699 | 0.853447680805618  | 0.964653958545747 | NA                      | NA                 | NA                                                                   | XP_021705129.1brimodomain adjacent to zinc finger domain protein 1A                 |
| AAEL0110: uncharacterized LOC5574380                                            | 0.0291973737565185 | 0.87987242744517   | 0.969652664055335 | NA                      | NA                 | KFB37508.1 AGAP00                                                    | KFB37508.1AGAP004466-like protein                                                   |
| AAEL0033: small G protein signaling modulator 3 homolog                         | 0.0292181946136445 | 0.905213163795421  | 0.975993693196454 | NA                      | NA                 | KXJ68704.1 hypothei                                                  | XP_001656725.1small G protein signaling modulator 3 homolog                         |
| AAEL0056: ethanolamine-phosphate cytidylyltransferase                           | 0.0292413527058645 | 0.799400331730097  | 0.946215055875588 | aag01100 ; aag          | XP_019530276.1 PRE | XP_001651208.1ethanolamine-phosphate cytidylyltransferase isoform X3 | XP_001651208.1ethanolamine-phosphate cytidylyltransferase isoform X3                |
| AAEL0096: exportin-7                                                            | 0.0294098416643921 | 0.80274365822174   | 0.94649029363412  | NA                      | NA                 | NA                                                                   | XP_021713348.1exportin-7 isoform X1                                                 |
| AAEL0170: elongation factor 1-alpha                                             | 0.0294360636064276 | 0.848453090138382  | 0.963483240428003 | NA                      | aag03013           | NA                                                                   | XP_011493435.1elongation factor 1-alpha                                             |
| AAEL0197: NA                                                                    | 0.0295857467192005 | 0.785977533141262  | 0.944484065495843 | NA                      | aag03013           | NA                                                                   | XP_021698824.1eukaryotic translation initiation factor 5B isoform X2                |
| AAEL0039: uncharacterized LOC5579183                                            | 0.0297346252103871 | 0.803487645789533  | 0.94649029363412  | NA                      | NA                 | KXJ82112.1 hypothei                                                  | XP_021709131.1uncharacterized protein LOC5579183                                    |
| AAEL0049: zinc finger protein 729                                               | 0.0297477253815464 | 0.896302953415378  | 0.973419066971699 | NA                      | NA                 | KXJ67823.1 hypothei                                                  | XP_021705323.1zinc finger protein 729                                               |
| AAEL0102: mediator of RNA polymerase II transcription subunit 29                | 0.0297919812510753 | 0.883640029712406  | 0.970521528629931 | NA                      | NA                 | NA                                                                   | XP_001654364.1mediator of RNA polymerase II transcription subunit 29 isoform X1     |
| AAEL0054: sorting nexin-27                                                      | 0.0297999769786216 | 0.879629135822296  | 0.969652664055335 | NA                      | NA                 | ETN58601.1 sorting r                                                 | XP_001650959.1sorting nexin-27 isoform X1                                           |
| AAEL0123: uncharacterized LOC5576199                                            | 0.0298548420375052 | 0.823099344777823  | 0.954452060294489 | NA                      | NA                 | KXJ72121.1 hypothei                                                  | XP_001662538.1uncharacterized protein LOC5576199                                    |
| AAEL0027: 39S ribosomal protein L37, mitochondrial                              | 0.0298868706598587 | 0.88239549190285   | 0.970357617045106 | NA                      | NA                 | KXJ7324.1 hypothei                                                   | XP_001662478.239S ribosomal protein L37, mitochondrial                              |
| AAEL0241: NA                                                                    | 0.0299179417949598 | 0.931731081081132  | 0.98347583693566  | NA                      | NA                 | NA                                                                   | XP_021709834.1WSCD family member AAEL009094                                         |
| AAEL0108: sodium-independent sulfate anion transporter                          | 0.0299367228391765 | 0.871301452181311  | 0.969040657231335 | 04151 ; 05165 ; 04714 ; | aag04068 ; aag     | NA                                                                   | XP_001654997.1sodium-independent sulfate anion transporter                          |
| AAEL0149: serine/threonine-protein kinase ATM                                   | 0.0299933674051451 | 0.883588880696762  | 0.970521528629931 | 04151 ; 05165 ; 04714 ; | aag04068 ; aag     | NA                                                                   | XP_021700538.1serine/threonine-protein kinase ATM isoform X1                        |
| AAEL0120: probable phospholipid hydroperoxide glutathione peroxidase            | 0.0300693493045122 | 0.784178325386442  | 0.944372632355572 | NA                      | aag01100 ; aag     | KXJ76355.1 hypothei                                                  | XP_021705458.1probable phospholipid hydroperoxide glutathione peroxidase isoform X2 |
| AAEL0109: probable 18S rRNA (guanine-N(7))-methyltransferase                    | 0.0301295276668879 | 0.881488514980702  | 0.970037947243772 | NA                      | NA                 | ETN60614.1 williams                                                  | XP_001661209.1probable 18S rRNA (guanine-N(7))-methyltransferase                    |
| AAEL0073: lipopolysaccharide-induced tumor necrosis factor-alpha factor homolog | 0.0301374191970826 | 0.805145817546505  | 0.947029572155807 | NA                      | NA                 | KFB42948.1 AGAP00                                                    | XP_001652694.2lipopolysaccharide-induced tumor necrosis factor-alpha factor homolog |
| AAEL0205: NA                                                                    | 0.0301470191705995 | 0.794034117038549  | 0.945793949302124 | NA                      | aag04933           | NA                                                                   | XP_021695034.1signal transducer and transcription activator isoform X5              |
| AAEL0080: ammonium transporter Rh type A                                        | 0.0302387916677674 | 0.87574393920107   | 0.969652664055335 | NA                      | NA                 | KXJ71166.1 hypothei                                                  | XP_001658851.2ammonium transporter Rh type A isoform X3                             |
| AAEL0144: serine-rich adhesin for platelets                                     | 0.0302681269230722 | 0.906164228350722  | 0.975993693196454 | NA                      | NA                 | NA                                                                   | XP_021708027.1uncharacterized protein LOC5564417 isoform X1                         |
| AAEL0067: ubiquitin-conjugating enzyme E2 C                                     | 0.0302775978051461 | 0.792205428616044  | 0.945793949302124 | NA                      | aag04120           | ETN64278.1 ubiquiti                                                  | XP_001652173.1ubiquitin-conjugating enzyme E2 C                                     |
| AAEL0017: protein tyrosine phosphatase type IVA 1                               | 0.0303308255056834 | 0.788671899617905  | 0.945232821987723 | NA                      | NA                 | KXJ74397.1 hypothei                                                  | XP_001660410.1protein tyrosine phosphatase type IVA 1 isoform X1                    |
| AAEL0068: transport and Golgi organization protein 6                            | 0.0303833856784483 | 0.908014490461068  | 0.976343694931    |                         |                    |                                                                      |                                                                                     |

|                                                                 |                     |                   |                   |                       |                     |                               |                                                                            |
|-----------------------------------------------------------------|---------------------|-------------------|-------------------|-----------------------|---------------------|-------------------------------|----------------------------------------------------------------------------|
| AAEL0079f serine protease snake                                 | 0.0327903208598067  | 0.882814759881772 | 0.970357617045106 | NA                    | NA                  | KXJ71168.1 hypothe            | XP_001658781.1serine protease snake                                        |
| AAEL10105f cysteine protease ATG4D                              | 0.0328762614499509  | 0.896637474610465 | 0.973667458268291 | NA                    | aag04140 ; aag      | NA                            | XP_001660889.2cysteine protease ATG4D isoform X1                           |
| AAEL0256f NA                                                    | 0.032992601126843   | 0.882454157638126 | 0.970357617045106 | 511                   | aag00511            | NA                            | XP_021713331.1cytosolic endo-beta-N-acetylglucosaminidase isoform X2       |
| AAEL0007f reticulon-1-A                                         | 0.03299927885324    | 0.776072925540573 | 0.941891725247211 | NA                    | NA                  | XP_019561060.1 PRE            | XP_001650264.1reticulon-1 isoform X1                                       |
| AAEL0038f DPH3 homolog                                          | 0.033034815887853   | 0.819059421034442 | 0.952969210637171 | NA                    | NA                  | KXJ76070.1 hypothe            | XP_021705727.1DPH3 homolog                                                 |
| AAEL0025f probable transcriptional regulatory protein TTE1135   | 0.0333453180676676  | 0.831527623232935 | 0.958742264774772 | NA                    | NA                  | KXJ81472.1 hypothe            | XP_001655587.1uncharacterized protein LOC5580162                           |
| AAEL0079f gustatory receptor 20                                 | 0.0334400612934335  | 0.937696624274759 | 0.984672410883981 | NA                    | NA                  | XP_019558163.1 PRE            | NP_001345205.1gustatory receptor 20 isoform h                              |
| AAEL0122f armadillo repeat-containing protein 6 homolog         | 0.0334638962249475  | 0.878885358832083 | 0.969652664055335 | NA                    | NA                  | KXJ84516.1 hypothe            | XP_021698308.1armadillo repeat-containing protein 6 homolog                |
| AAEL1048f dynactin subunit 6                                    | 0.0334687475300104  | 0.915299740189951 | 0.978301715339473 | NA                    | NA                  | NA                            | XP_001663785.1dynactin subunit 6                                           |
| AAEL0209f NA                                                    | 0.0334805715514178  | 0.770924575303173 | 0.941147080452193 | NA                    | NA                  | NA                            | XP_021694639.1zinc carboxypeptidase                                        |
| AAEL0042f CDGSH iron-sulfur domain-containing protein 2 homolog | 0.0335366513880369  | 0.748927981409121 | 0.932554085844433 | NA                    | NA                  | ETN58699.1 CDGSH i            | XP_001648745.1CDGSH iron-sulfur domain-containing protein 2 homolog        |
| AAEL0035f sprouty-related, EVH1 domain-containing protein 1     | 0.0335707606525779  | 0.850811422733331 | 0.964536838405106 | NA                    | NA                  | XP_019552712.1 PRE            | XP_021710765.1sprouty-related, EVH1 domain-containing protein 1 isoform X2 |
| AAEL0196f NA                                                    | 0.0335744747093924  | 0.848608992473057 | 0.963483240428003 | NA                    | NA                  | NA                            | XP_021710908.1graves disease carrier protein homolog isoform X2            |
| AAEL0079f disks large homolog 5                                 | 0.0336046092672845  | 0.823139703793981 | 0.954452060294489 | NA                    | NA                  | KXJ82599.1 hypothe            | XP_021704088.1disks large homolog 5 isoform X1                             |
| AAEL0120f zinc finger protein 510                               | 0.0336559592647498  | 0.900944116367557 | 0.974252903274646 | NA                    | NA                  | KXJ72265.1 hypothe            | XP_001662156.2zinc finger protein 510                                      |
| AAEL0009f DPH4 homolog                                          | 0.0336745431882181  | 0.900184393558197 | 0.974065297962641 | NA                    | NA                  | KXJ70074.1 hypothe            | XP_001657497.1DPH4 homolog                                                 |
| AAEL0014f protoheme IX farnesyltransferase, mitochondrial       | 0.0337184689984813  | 0.756344909118705 | 0.934127170333935 | 860                   | aag01100 ; aag      | KXJ80973.1 hypothe            | XP_001653393.1protoheme IX farnesyltransferase, mitochondrial              |
| AAEL0016f WD repeat-containing protein 81                       | 0.0337388306010313  | 0.816819081227326 | 0.952403596737691 | NA                    | NA                  | KXJ81394.1 hypothe            | XP_021701168.1WD repeat-containing protein 81                              |
| AAEL0085f 28S ribosomal protein S2, mitochondrial               | 0.0337392230366747  | 0.797433663451733 | 0.945982283238732 | NA                    | aag03010            | KXJ68945.1 hypothe            | XP_001653316.228S ribosomal protein S2, mitochondrial                      |
| AAEL0207f NA                                                    | 0.0337518710298418  | 0.846668859270518 | 0.963198678766584 | NA                    | NA                  | NA                            | XP_021704551.1ribosome biogenesis ATPase RIX7-like                         |
| AAEL0277f NA                                                    | 0.0337797444823058  | 0.866414029220594 | 0.968074250389273 | NA                    | NA                  | NA                            | XP_021694545.1microtubule-associated protein futsch isoform X1             |
| AAEL0274f NA                                                    | 0.0337944659423361  | 0.766106515851462 | 0.939178856256477 | NA                    | NA                  | NA                            | XP_021699558.1helicase domino isoform X3                                   |
| AAEL0023f eukaryotic translation initiation factor 3 subunit E  | 0.0338251696227568  | 0.778665015797494 | 0.943047575068247 | aag03013              | ETN66627.1 eukaryo  | XP_001661371.1eukaryo         | XP_001661371.1eukaryotic translation initiation factor 3 subunit E         |
| AAEL0230f NA                                                    | 0.0338543059459856  | 0.760005807735981 | 0.935871383184374 | aag03050              | NA                  | XP_001649429.1265             | XP_001649429.1265 proteasome regulatory subunit 8                          |
| AAEL0239f NA                                                    | 0.0338602534718245  | 0.922842020036399 | 0.981343310857761 | NA                    | NA                  | XP_021708214.1zinc            | XP_021708214.1zinc finger protein OZF                                      |
| AAEL0217f NA                                                    | 0.0338845330096029  | 0.846503149352225 | 0.963198678766584 | NA                    | NA                  | XP_019559588.1                | XP_019559588.1enhancer of rudimentary homolog                              |
| AAEL0218f NA                                                    | 0.0338868503239067  | 0.771478161194443 | 0.941147080452193 | NA                    | NA                  | NA                            | NA                                                                         |
| AAEL0198f NA                                                    | 0.0340447658184724  | 0.779989122666957 | 0.943566949556407 | NA                    | aag04120            | NA                            | XP_021697450.1probable E3 ubiquitin-protein ligase HERC4 isoform X2        |
| AAEL0000f secretory carrier-associated membrane protein 2       | 0.034076957581215   | 0.756377024616621 | 0.934127170333935 | NA                    | NA                  | XP_019544927.1 PRE            | XP_001647933.1secretory carrier-associated membrane protein 2 isoform X3   |
| AAEL0195f NA                                                    | 0.0340937815806263  | 0.822251721079721 | 0.954452060294489 | 270                   | aag01100 ; aag      | NA                            | XP_021703760.15-adenosylmethionine synthase isoform X2                     |
| AAEL0044f N-acetylglucosamine-6-sulfatase                       | 0.0340977438181322  | 0.765530083852604 | 0.939129160326845 | 531                   | aag01100 ; aag      | KXJ76976.1 hypothe            | XP_001649229.1N-acetylglucosamine-6-sulfatase isoform X1                   |
| AAEL0075f actin-related protein 2/3 complex subunit 1A          | 0.0342571890266096  | 0.77670984113804  | 0.942167671738845 | NA                    | aag04144            | KXJ74977.1 hypothe            | XP_001658440.2actin-related protein 2/3 complex subunit 1A                 |
| AAEL0290f NA                                                    | 0.0342856063291452  | 0.778599044907601 | 0.943047575068247 | NA                    | NA                  | XP_001653504.1cytochrome c    | XP_001653504.1cytochrome c oxidase subunit 6B1 isoform X2                  |
| AAEL0195f NA                                                    | 0.034440908145233   | 0.848728009879308 | 0.963483240428003 | 04151 ; 05165 ; 04714 | aag04392            | NA                            | XP_021708527.1serine/threonine-protein kinase PAK 1 isoform X4             |
| AAEL0092f protein KTI12 homolog                                 | 0.0344878267834317  | 0.863129143542312 | 0.966713045140744 | NA                    | NA                  | NA                            | XP_001653777.1protein KTI12 homolog                                        |
| AAEL0109f kelch-like protein diablo                             | 0.0345184478193415  | 0.751847385388689 | 0.932629041660887 | NA                    | NA                  | BOWWPP2.2 RecName             | XP_001661146.1kelch-like protein diablo                                    |
| AAEL0015f sodium/hydrogen exchanger 3                           | 0.0345217136385835  | 0.769585020058815 | 0.941147080452193 | NA                    | NA                  | XP_021700615.1sodium/hydrogen | XP_021700615.1sodium/hydrogen exchanger 3 isoform X7                       |
| AAEL0064f programmed cell death protein 10                      | 0.03456069573447432 | 0.748761243306271 | 0.932554085844433 | NA                    | ETN58348.1 prograrr | XP_001657782.1programmed      | XP_001657782.1programmed cell death protein 10                             |
| AAEL0102f x                                                     |                     |                   |                   |                       |                     |                               |                                                                            |

|                    |                                                         |                    |                    |                   |          |                   |                                                              |                                                                                           |                                   |
|--------------------|---------------------------------------------------------|--------------------|--------------------|-------------------|----------|-------------------|--------------------------------------------------------------|-------------------------------------------------------------------------------------------|-----------------------------------|
| AAEL01501          | protein artichoke                                       | 0.0368758769827609 | 0.852146577680438  | 0.964626990751063 | NA       | NA                | NA                                                           | XP_021698717.1protein artichoke                                                           |                                   |
| AAEL01363          | uncharacterized LOC5578310                              | 0.0368811416048337 | 0.827228171106333  | 0.956432333168643 | NA       | NA                | NA                                                           | XP_001656894.2uncharacterized protein LOC5578310                                          |                                   |
| 0.0369191140832602 | transcription factor BTF3 homolog 4                     | 0.764773292698699  | 0.764773292698699  | 0.938701325785438 | NA       | aag04214          | NA                                                           | XP_001662369.1transcription factor BTF3 homolog 4                                         |                                   |
| AAEL01944          | NA                                                      | 0.0369388653595439 | 0.807744798867117  | 0.948190794639012 | NA       | aag03040          | NA                                                           | XP_021693013.1intron-binding protein aquarius                                             |                                   |
| AAEL00823          | F-box/LRR-repeat protein 14                             | 0.0369850821015885 | 0.83961306543875   | 0.962916323585959 | NA       | NA                | KFB45523.1 Dsec(GA                                           | XP_021700181.1F-box/LRR-repeat protein 14                                                 |                                   |
| AAEL00613          | general odorant-binding protein 83a                     | 0.0369905435498304 | 0.833376000638219  | 0.959902797120062 | NA       | NA                | KXJ68133.1 hypothe                                           | XP_001651827.2general odorant-binding protein 83a                                         |                                   |
| AAEL01267          | D-aspartate oxidase                                     | 0.0370843799409442 | 0.87922549883216   | 0.969652664055335 | NA       | aag01100          | ; aag                                                        | XP_001851437.1 d-a                                                                        | XP_001662804.1D-aspartate oxidase |
| AAEL00253          | DNA topoisomerase I, mitochondrial                      | 0.0371649451234842 | 0.753250844594744  | 0.933081420650645 | NA       | NA                | KXJ80888.1 hypothe                                           | XP_021713406.1DNA topoisomerase I, mitochondrial                                          |                                   |
| AAEL01163          | UPF0598 protein CG30010                                 | 0.0372959176503799 | 0.871656200727105  | 0.969029518523332 | NA       | NA                | XP_001845840.1 con                                           | XP_001661806.2UPF0598 protein CG30010                                                     |                                   |
| AAEL01943          | NA                                                      | 0.037486509413638  | 0.817220955133013  | 0.952514760254484 | NA       | aag00534          | NA                                                           | XP_001656973.2heparan-sulfate 6-O-sulfotransferase 2                                      |                                   |
| AAEL00847          | 27 kDa hemolymph protein                                | 0.0375289117513519 | 0.774257326051801  | 0.94123090670349  | NA       | NA                | KXJ83464.1 hypothe                                           | XP_001659256.227 kDa hemolymph protein                                                    |                                   |
| AAEL01252          | YEATS domain-containing protein 4                       | 0.0375719201062449 | 0.926522145321598  | 0.98246793976139  | NA       | NA                | KXJ78581.1 hypothe                                           | XP_001662633.1YEATS domain-containing protein 4                                           |                                   |
| AAEL00693          | PITH domain-containing protein GA19395                  | 0.0375849436385132 | 0.826736167434996  | 0.956332647735617 | NA       | NA                | XP_001845469.1 thic                                          | XP_001658071.1PITH domain-containing protein GA19395                                      |                                   |
| AAEL01404          | thioredoxin domain-containing protein 17                | 0.0376489701310563 | 0.742816143499761  | 0.930112144847571 | NA       | NA                | XP_001664307.1thioredoxin domain-containing protein 17       |                                                                                           |                                   |
| AAEL01181          | ER membrane protein complex subunit 2                   | 0.0376933613587735 | 0.771887318828948  | 0.941147080452193 | NA       | NA                | KXJ80243.1 hypothe                                           | XP_001661937.2ER membrane protein complex subunit 2                                       |                                   |
| AAEL00973          | chitinase-like protein 3                                | 0.0376937551658602 | 0.80105252200503   | 0.946215055875588 | 520      | aag01100          | ; aag                                                        | XP_001654045.2chitinase-like protein 3                                                    |                                   |
| AAEL00753          | protein valois                                          | 0.0377037234959295 | 0.853509193200095  | 0.964653958545747 | NA       | NA                | KXJ78546.1 hypothe                                           | XP_001658432.1protein valois                                                              |                                   |
| AAEL01983          | NA                                                      | 0.0377142528967253 | 0.737321379465262  | 0.927599209713406 | NA       | NA                | NA                                                           | XP_019550247.1 putative mediator of RNA polymerase II transcription subunit 24 isoform X3 |                                   |
| AAEL01073          | WD repeat domain phosphoinositide-interacting protein 3 | 0.0377292737308959 | 0.770364541762654  | 0.941147080452193 | NA       | NA                | ETN67399.1 Autophz                                           | XP_001654902.2WD repeat domain phosphoinositide-interacting protein 3                     |                                   |
| AAEL02212          | NA                                                      | 0.0377976629379731 | 0.721248916697581  | 0.921583569204186 | NA       | NA                | NA                                                           | XP_021701614.1 vacular protein sorting-associated protein 13D                             |                                   |
| AAEL00583          | exosome complex exonuclease RRP42                       | 0.0378049162812706 | 0.865845830260682  | 0.967927335900485 | aag03018 | ETN62123.1 exosom | XP_001651510.2exosome complex exonuclease RRP42              |                                                                                           |                                   |
| AAEL01163          | serine protease snake                                   | 0.0378214572306879 | 0.805211842267663  | 0.947029572155807 | NA       | NA                | XP_019551449.1 PRE                                           | XP_001661794.2serine protease snake isoform X2                                            |                                   |
| AAEL00233          | uncharacterized LOC5574475                              | 0.0378592299356494 | 0.791685738232871  | 0.945793949302124 | NA       | NA                | KXJ81911.1 hypothe                                           | XP_021699621.1uncharacterized protein LOC5574475                                          |                                   |
| AAEL01441          | probable cytochrome P450 304a1                          | 0.0379070681280865 | 0.745463461142271  | 0.931365937538534 | NA       | NA                | XP_001648725.1probable cytochrome P450 304a1                 |                                                                                           |                                   |
| AAEL01193          | tRNA selenocysteine 1-associated protein 1              | 0.0380061824630712 | 0.815142820490977  | 0.952015623780574 | NA       | NA                | KXJ75050.1 hypothe                                           | XP_001655804.1tRNA selenocysteine 1-associated protein 1                                  |                                   |
| AAEL00473          | metallo-beta-lactamase domain-containing protein 1      | 0.0380783485746467 | 0.791919338276131  | 0.945793949302124 | NA       | NA                | XP_011554239.1 PRE                                           | XP_021701015.1metallo-beta-lactamase domain-containing protein 1                          |                                   |
| AAEL01333          | trafficking protein particle complex subunit 1          | 0.0381009525694963 | 0.8528114179640873 | 0.964653958545747 | NA       | NA                | XP_001663510.1trafficking protein particle complex subunit 1 |                                                                                           |                                   |
| AAEL01293          | uncharacterized LOC5577021                              | 0.0381483388826369 | 0.857677982882026  | 0.964980728557884 | NA       | NA                | XP_001656307.2uncharacterized protein LOC5577021 isoform X1  |                                                                                           |                                   |
| AAEL01943          | NA                                                      | 0.0381721635704131 | 0.811467119872938  | 0.950136205251403 | aag04214 | NA                | XP_021710216.1ecdysone receptor isoform X1                   |                                                                                           |                                   |
| AAEL00427          | 17-beta-hydroxysteroid dehydrogenase 13                 | 0.0382144345134118 | 0.870722500002709  | 0.968967038943636 | NA       | NA                | XP_001866722.1 sho                                           | XP_001648844.117-beta-hydroxysteroid dehydrogenase 13                                     |                                   |
| AAEL00863          | ATP-binding cassette sub-family G member 4              | 0.0382425660168291 | 0.828221397707704  | 0.954452060294489 | NA       | NA                | XP_001863367.1 ATF                                           | XP_001653359.2ATP-binding cassette sub-family G member 4                                  |                                   |
| AAEL01953          | NA                                                      | 0.0382769661493009 |                    |                   |          |                   |                                                              |                                                                                           |                                   |









|                                                                       |                     |                    |                    |                     |               |                      |                                                                                         |
|-----------------------------------------------------------------------|---------------------|--------------------|--------------------|---------------------|---------------|----------------------|-----------------------------------------------------------------------------------------|
| AAEL0024: symplekin                                                   | 0.0610213739629957  | 0.72175035888731   | 0.921668998401475  | NA                  | aag03015      | KXJ75644.1 hypothe   | XP_019932162.1 symplekin-like                                                           |
| AAEL0020: sin3 histone deacetylase corepressor complex component SD53 | 0.0610941209427167  | 0.775377115588648  | 0.941792531368366  | NA                  | NA            | KXJ79250.1 hypothe   | XP_021712942.1sin3 histone deacetylase corepressor complex component SD53               |
| AAEL0040: iron-sulfur cluster assembly scaffold protein lscU          | 0.0611343574370317  | 0.60740616680144   | 0.893547770777888  | NA                  | NA            | ETN66548.1 nitrogen  | KFB48253.1AGAP005813-like protein                                                       |
| AAEL0198: NA                                                          | 0.0611498066208076  | 0.832243885402582  | 0.95920694307046   | NA                  | NA            | NA                   | XP_021697345.1protein dead ringer isoform X5                                            |
| AAEL0280: NA                                                          | 0.061174639047014   | 0.655563335520918  | 0.908328180248866  | NA                  | NA            | NA                   | NA                                                                                      |
| AAEL0061: 39S ribosomal protein L55, mitochondrial                    | 0.0612825278790215  | 0.743683677698271  | 0.930691853961579  | NA                  | NA            | KXJ62435.1 hypothe   | XP_001651805.139S ribosomal protein L55, mitochondrial                                  |
| AAEL0056: serine protease inhibitor 27A                               | 0.0612926025914304  | 0.654494395880863  | 0.9078470652541    | NA                  | NA            | KXJ74881.1 hypothe   | XP_001651232.2serine protease inhibitor 27A                                             |
| AAEL0045: coatomer subunit beta                                       | 0.0613024355949972  | 0.582901717836115  | 0.884917975521096  | NA                  | NA            | KFB52575.1 AGAP00    | XP_001649392.1coatomer subunit beta                                                     |
| AAEL0272: NA                                                          | 0.0613091737240268  | 0.60835511027528   | 0.893547770777888  | NA                  | NA            | NA                   | NA                                                                                      |
| AAEL0155: NA                                                          | 0.061551758276291   | 0.76765337593585   | 0.939827742988808  | NA                  | NA            | NA                   | XP_001647648.2succinate--hydroxymethylglutarate CoA-transferase                         |
| AAEL0113: uncharacterized LOC5574726                                  | 0.0615747025820528  | 0.75571238842231   | 0.9341271710333935 | NA                  | NA            | KXJ82632.1 hypothe   | XP_021698639.1uncharacterized protein LOC5574726                                        |
| AAEL0021: soma ferritin                                               | 0.0615970110654767  | 0.584776026931307  | 0.885175928718656  | NA                  | NA            | KXJ69687.1 hypothe   | XP_001654814.1soma ferritin                                                             |
| AAEL0074: mediator of RNA polymerase II transcription subunit 27      | 0.0616090856749583  | 0.817519433826638  | 0.952514760254484  | NA                  | NA            | KFB46004.1 AGAP00    | XP_001652785.1mediator of RNA polymerase II transcription subunit 27                    |
| AAEL0238: NA                                                          | 0.0616958897607948  | 0.7716917885042    | 0.941147080452193  | NA                  | NA            | NA                   | XP_019528973.1 cadherin-87A-like                                                        |
| AAEL0060: uncharacterized LOC5567400                                  | 0.0617786175681182  | 0.775502769073264  | 0.941820836876359  | NA                  | NA            | NA                   | XP_021704781.1uncharacterized protein LOC5567400 isoform X1                             |
| AAEL0109: ataxin-1                                                    | 0.0618066412397684  | 0.755566330818675  | 0.934127170333935  | NA                  | aag04330      | KXJ71232.1 hypothe   | XP_019558787.1 ataxin-1                                                                 |
| AAEL0076: protein Tube                                                | 0.0619342424431263  | 0.784219155049108  | 0.944372632355572  | NA                  | aag04624      | KXJ82023.1 hypothe   | XP_001658540.2protein Tube                                                              |
| AAEL0101: solute carrier family 35 member G1                          | 0.0619543143129194  | 0.8783602765069    | 0.969652664055335  | NA                  | NA            | NA                   | XP_001654273.2solute carrier family 35 member G1                                        |
| AAEL0256: NA                                                          | 0.0620018960195337  | 0.640534751224342  | 0.904464102888003  | NA                  | NA            | NA                   | NA                                                                                      |
| AAEL0104: EH domain-containing protein 3                              | 0.0621656048042293  | 0.605865005969274  | 0.893547770777888  | NA                  | aag04144      | NA                   | XP_001654538.1EH domain-containing protein 3 isoform X2                                 |
| AAEL0049: uncharacterized LOC565682                                   | 0.0622199249967144  | 0.56034994284097   | 0.87800595572912   | NA                  | NA            | KXJ81824.1 hypothe   | XP_019541538.1 histone-lysine N-methyltransferase SETD18-like                           |
| AAEL0140: transcription initiation factor TFIID subunit 2             | 0.0622280232823853  | 0.678476184116391  | 0.914481546552978  | NA                  | aag03022      | NA                   | XP_001664244.2transcription initiation factor TFIID subunit 2                           |
| AAEL0105: chromosome-associated kinesin KIF4A                         | 0.0622891977166659  | 0.831786624726     | 0.958914419043759  | NA                  | NA            | KXJ77915.1 hypothe   | XP_021703730.1chromosome-associated kinesin KIF4A                                       |
| AAEL0206: NA                                                          | 0.0623139554359217  | 0.578831890371337  | 0.882283691803025  | NA                  | aag03018      | NA                   | XP_021701849.1CCR4-NOT transcription complex subunit 1                                  |
| AAEL0079: cleavage and polyadenylation specificity factor 73          | 0.0623324336697773  | 0.756570680098122  | 0.934188766995886  | NA                  | aag03015      | XP_001866010.1 cle:  | XP_001652976.1cleavage and polyadenylation specificity factor 73                        |
| AAEL0017: maf-like protein CPR_2112                                   | 0.0623791858714071  | 0.587984383494887  | 0.886401261871374  | NA                  | NA            | KXJ74398.1 hypothe   | XP_019536345.1 N-acetylserotonin O-methyltransferase-like protein                       |
| AAEL0197: NA                                                          | 0.0623877013581455  | 0.720727661726446  | 0.921583569204186  | NA                  | NA            | NA                   | XP_021703168.1AF4/FMR2 family member 4 isoform X1                                       |
| AAEL0111: ribosomal protein 63, mitochondrial                         | 0.0624643993983228  | 0.600309501820982  | 0.892093596129407  | NA                  | NA            | ETN64402.1 hypothe   | XP_001661454.1ribosomal protein 63, mitochondrial                                       |
| AAEL0055: GTP-binding protein 128up                                   | 0.0625051313743456  | 0.623593046772072  | 0.898575511493361  | 970                 | NA            | ETN58057.1 develop   | XP_001651096.1GTP-binding protein 128up                                                 |
| AAEL0078: protein LSM12 homolog A                                     | 0.0625051997945999  | 0.605759058823632  | 0.893547770777888  | NA                  | aag04711      | XP_001868919.1 con   | XP_001652936.2protein LSM12 homolog A                                                   |
| AAEL0021: cell cycle control protein 50A                              | 0.0625098777983868  | 0.5725301868338    | 0.880923047085115  | NA                  | NA            | KXJ78912.1 hypothe   | XP_001654806.1cell cycle control protein 50A                                            |
| AAEL0145: protein sprouty                                             | 0.0625210530595265  | 0.737596926377805  | 0.927599209713406  | NA                  | aag04013      | NA                   | XP_021698821.1protein sprouty                                                           |
| AAEL0223: NA                                                          | 0.0626414498418693  | 0.607339231306834  | 0.893547770777888  | NA                  | NA            | NA                   | XP_019550035.1 voltage-dependent anion-selective channel-like                           |
| AAEL0249: NA                                                          | 0.0627030572895131  | 0.831495787834748  | 0.958742264774772  | NA                  | NA            | NA                   | XP_021693809.1uncharacterized protein LOC110674174                                      |
| AAEL0098: uncharacterized LOC5572538                                  | 0.0628159807041728  | 0.750999844533076  | 0.932554085844433  | NA                  | NA            | NA                   | XP_001654057.2uncharacterized protein LOC5572538                                        |
| AAEL0086: guanine nucleotide-binding protein subunit alpha homolog    | 0.0629121074671321  | 0.840838772247441  | 0.963198678766584  | NA                  | NA            | ETN59294.1 GTP-bin   | XP_001653369.1guanine nucleotide-binding protein subunit alpha homolog                  |
| AAEL0014: uncharacterized LOC5570921                                  | 0.0629615891410927  | 0.584899913549737  | 0.885175928718656  | NA                  | NA            | KXJ80192.1 hypothe   | XP_001653400.2uncharacterized protein LOC5570921                                        |
| AAEL0250: NA                                                          | 0.062975564136347   | 0.559126687222446  | 0.877581080322399  | NA                  | NA            | NA                   | XP_021700832.1nuclear receptor-binding protein isoform X1                               |
| AAEL0103: charged multivesicular body protein 6                       | 0.0629791624081166  | 0.679254092268581  | 0.914481546552978  | NA                  | aag04144      | NA                   | XP_001654507.1charged multivesicular body protein 6                                     |
| AAEL0197: NA                                                          | 0.0630432575324456  | 0.65816164548555   | 0.909516556517693  | NA                  | aag04144      | NA                   | XP_021703476.1centaurin-gamma-1A isoform X1                                             |
| AAEL0115: cysteine and histidine-rich protein 1 homolog               | 0.0630735303446001  | 0.600535790486423  | 0.892093596129407  | NA                  | NA            | XP_019544130.1 PRE   | XP_001661753.2cysteine and histidine-rich protein 1 homolog                             |
| AAEL0075: ATP-dependent RNA helicase SUV3 homolog, mitochondrial      | 0.0631908756157589  | 0.745924014602235  | 0.931365937538534  | NA                  | NA            | XP_001845729.1 ATF   | XP_001658414.2ATP-dependent RNA helicase SUV3 homolog, mitochondrial                    |
| AAEL0153: FIT family protein CG1061                                   | 0.0632676186376516  | 0.759064272636391  | 0.935439571457873  | NA                  | NA            | NA                   | XP_001657345.1FIT family protein CG1061                                                 |
| AAEL0277: NA                                                          | 0.063281522930879   | 0.794344624972245  | 0.945793949302124  | NA                  | aag03420; aag | NA                   | XP_021705412.1DNA polymerase delta catalytic subunit                                    |
| AAEL0049: uncharacterized LOC5565767                                  | 0.0634399958359078  | 0.6323651473052225 | 0.954684576776241  | NA                  | NA            | KXJ76543.1 hypothe   | XP_001650116.1uncharacterized protein LOC5565767                                        |
| AAEL0170: protein henna                                               | 0.06346040664807721 | 0.577570717138617  | 0.8819614915187822 | 00360; 00400; 00790 | aag01100; aag | NA                   | XP_011493674.1protein henna isoform X2                                                  |
| AAEL0060: fibronectin type-III domain-containing protein 3a           | 0.0634665400572636  | 0.720425578846296  | 0.921583569204186  | NA                  | NA            | XP_019540856.1 PRE   | XP_021704046.1fibronectin type-III domain-containing protein 3a isoform X2              |
| AAEL0195: NA                                                          | 0.063532717597176   | 0.58123147755401   | 0.883594430630159  | NA                  | aag03040      | NA                   | XP_021695618.1splicing factor 3B subunit 3 isoform X1                                   |
| AAEL0018: tubulin polyglutamylase TTL4                                | 0.063676974541844   | 0.593882808067263  | 0.888690215018581  | NA                  | NA            | XP_019559089.1 PRE   | XP_021702687.1tubulin polyglutamylase TTL4 isoform X1                                   |
| AAEL0275: NA                                                          | 0.0637003537537831  | 0.5761842371552    | 0.88176406566298   | NA                  | NA            | NA                   | XP_021707726.1clustered mitochondria protein homolog                                    |
| AAEL0089: probable rRNA-processing protein EBP2 homolog               | 0.0638302730453457  | 0.63769820842854   | 0.903618557739363  | NA                  | NA            | ETN63463.1 rRNA pn   | XP_021696269.1probable rRNA-processing protein EBP2 homolog                             |
| AAEL0006: uncharacterized LOC5565916                                  | 0.0639677666242514  | 0.608077374032131  | 0.893547770777888  | NA                  | NA            | KXJ73216.1 hypothe   | XP_001650272.2uncharacterized protein LOC5565916                                        |
| AAEL0096: uncharacterized LOC5572233                                  | 0.0640110543530794  | 0.66381792875429   | 0.911573284643631  | NA                  | NA            | NA                   | XP_001653919.1uncharacterized protein LOC5572233                                        |
| AAEL0138: WD repeat-containing protein 44                             | 0.0640231495500912  | 0.622969303120137  | 0.898271200863489  | NA                  | NA            | NA                   | XP_001664046.2WD repeat-containing protein 44 isoform X2                                |
| AAEL0027: nucleolar and coiled-body phosphoprotein 1                  | 0.0640479615247874  | 0.710850113169228  | 0.918935795219545  | NA                  | NA            | KXJ74750.1 hypothe   | XP_021709845.1nucleolar and coiled-body phosphoprotein 1                                |
| AAEL0199: NA                                                          | 0.0640610977383338  | 0.6384455622955    | 0.90377215326912   | NA                  | NA            | NA                   | XP_021703482.1disintegrin and metalloproteinase domain-containing protein 10 isoform X1 |
| AAEL0097: uncharacterized LOC5572384                                  | 0.0640757511926178  | 0.790378902323796  | 0.945793949302124  | NA                  | NA            | NA                   | XP_001654041.2uncharacterized protein LOC5572384                                        |
| AAEL0024: proteasome subunit beta type-2                              | 0.0640962431940854  | 0.576112200365939  | 0.881764069566298  | NA                  | aag03050      | KXJ82419.1 hypothe   | XP_001655145.1proteasome subunit beta type-2                                            |
| AAEL0093: protein O-GlcNacase                                         | 0.0641071753882891  | 0.696599570999293  | 0.916122517126697  | NA                  | NA            | NA                   | XP_021712744.1protein O-GlcNacase                                                       |
| AAEL0120: casein kinase II subunit alpha                              | 0.0642270128746716  | 0.632997056746313  | 0.902506916959539  | NA                  | aag03008; aag | ETN66867.1 casein k: | XP_001655863.1casein kinase II subunit alpha                                            |
| AAEL0104: beclin-1-like protein                                       | 0.0642396132532604  | 0.794784309184707  | 0.945793949302124  | NA                  | aag04140; aag | NA                   | XP_001654535.1beclin-1-like protein                                                     |
| AAEL0028: uncharacterized LOC5576364                                  | 0.064244975311579   | 0.68493543626164   | 0.914629465876247  | NA                  | NA            | KXJ72213.1 hypothe   | XP_001656102.1uncharacterized protein LOC5576364                                        |
| AAEL0182: NA                                                          | 0.0643245237649648  | 0.643189217476575  | 0.906097241154232  | NA                  | NA            | NA                   | XP_021693874.1probable E3 ubiquitin-protein ligase MGRN1                                |
| AAEL0106: NA                                                          | 0.0643709196798728  | 0.569078307801542  | 0.880635379772131  | NA                  | NA            | XP_019556605.1 PRE   | XP_021698195.1protein lethal(2)essential for life isoform X2                            |
| AAEL0132: protein quiver                                              | 0.0644026026046692  | 0.864310574172253  | 0.9670380506393142 | NA                  | NA            | NA</                 |                                                                                         |

|                                                                             |                    |                    |                    |                         |                    |                                                                                     |                                                                                 |
|-----------------------------------------------------------------------------|--------------------|--------------------|--------------------|-------------------------|--------------------|-------------------------------------------------------------------------------------|---------------------------------------------------------------------------------|
| AAEL0068c uncharacterized aarF domain-containing protein kinase 1           | 0.065119099870486  | 0.54903894493627   | 0.873169431463929  | NA                      | NA                 | KXJ79848.1 hypothe                                                                  | XP_001652210.1uncharacterized aarF domain-containing protein kinase 1           |
| AAEL0206c NA                                                                | 0.0652338128705794 | 0.618749898304556  | 0.897318336565571  | 04151 ; 05165 ; 04714 ; | aag04150 ; aag     | NA                                                                                  | XP_021703833.1target of rapamycin                                               |
| AAEL0198c NA                                                                | 0.0652775900374911 | 0.802031427008144  | 0.946312756934087  | NA                      | NA                 | NA                                                                                  | XP_021703237.1zinc finger protein 184-like                                      |
| AAEL0002c gamma-glutamyl hydrolase                                          | 0.0653865628515989 | 0.619381708743251  | 0.897318336565571  | 790                     | aag00790           | NA                                                                                  | XP_001654803.2gamma-glutamyl hydrolase isoform X2                               |
| AAEL0016c tetracycline resistance protein, class D                          | 0.0654118464260855 | 0.647811619638366  | 0.906554905014882  | NA                      | NA                 | KXJ83555.1 hypothe                                                                  | XP_001659954.2uncharacterized protein LOC5571822                                |
| AAEL0155c polymerase-2                                                      | 0.0654245947640328 | 0.559121266253898  | 0.877581080323399  | NA                      | NA                 | NA                                                                                  | XP_019562634.1 serine protease 53                                               |
| AAEL0041c uncharacterized LOC5564242                                        | 0.0655821546525189 | 0.635617231265642  | 0.902538767814767  | NA                      | NA                 | NA                                                                                  | XP_021698325.1uncharacterized protein LOC5564242                                |
| AAEL0104c DNA-directed RNA polymerase I subunit RPA12                       | 0.0656394942494602 | 0.672910371973037  | 0.912968243848131  | NA                      | aag03020           | NA                                                                                  | XP_001660857.1DNA-directed RNA polymerase I subunit RPA12                       |
| AAEL0122c presequence protease, mitochondrial                               | 0.0657405123213908 | 0.637088287495773  | 0.902893334596658  | NA                      | NA                 | KXJ84515.1 hypothe                                                                  | XP_001662373.2presequence protease, mitochondrial                               |
| AAEL0200c NA                                                                | 0.0657643525891548 | 0.601967625216178  | 0.892353896540881  | NA                      | NA                 | NA                                                                                  | XP_021713168.1anoctamin-5 isoform X4                                            |
| AAEL0134c ecotropic viral integration site 5 ortholog                       | 0.0658050518639848 | 0.683279481375336  | 0.914629465876247  | NA                      | NA                 | NA                                                                                  | XP_001656716.1ecotropic viral integration site 5 ortholog isoform X2            |
| AAEL0078c pre-mRNA-splicing factor cwf16                                    | 0.0658355641208487 | 0.771977953059329  | 0.941147080452193  | NA                      | ETN57752.1 hypothe | XP_001652958.1pre-mRNA-splicing factor cwf16                                        |                                                                                 |
| AAEL0125c serine/threonine-protein kinase 11-interacting protein            | 0.0658423555632882 | 0.687942888113328  | 0.916010156153545  | NA                      | NA                 | KXJ80196.1 hypothe                                                                  | XP_021700217.1serine/threonine-protein kinase 11-interacting protein isoform X2 |
| AAEL0156c multidrug resistance-associated protein 9                         | 0.0658689455840097 | 0.714767250528967  | 0.92089841424905   | NA                      | NA                 | NA                                                                                  | XP_021711796.1multidrug resistance-associated protein 9                         |
| AAEL0050c serine/threonine-protein phosphatase 5                            | 0.0661033569901157 | 0.749143481225393  | 0.932554085844433  | 04660 ; 04658           | NA                 | XP_001850926.1 seri                                                                 | XP_001650298.2serine/threonine-protein phosphatase 5                            |
| AAEL0141c ADP-ribosylation factor-like protein 1                            | 0.0661326294565413 | 0.645730633949178  | 0.906554905014882  | NA                      | NA                 | NA                                                                                  | XP_001648164.1ADP-ribosylation factor-like protein 1                            |
| AAEL0081c putative tRNA (cytidine(32)/guanosine(34)-2'-O)-methyltransferase | 0.0663693400960163 | 0.706520973778546  | 0.917888747806639  | NA                      | NA                 | KXJ83075.1 hypothe                                                                  | XP_001658956.1putative tRNA (cytidine(32)/guanosine(34)-2'-O)-methyltransferase |
| AAEL0232c NA                                                                | 0.0663966247581251 | 0.793303506073097  | 0.945793949302124  | NA                      | NA                 | NA                                                                                  | XP_001658699.2serine/arginine repetitive matrix protein 1                       |
| AAEL0281c NA                                                                | 0.0664384883753235 | 0.731591512091601  | 0.925260275963946  | NA                      | NA                 | NA                                                                                  | XP_021710261.1protein couch potato isoform X4                                   |
| AAEL0056c insulin receptor                                                  | 0.0664602520671683 | 0.78663023887878   | 0.944549897171207  | NA                      | NA                 | KFB49143.1 AGAP00                                                                   | XP_001651210.2insulin receptor                                                  |
| AAEL0195c NA                                                                | 0.06656339770905   | 0.710209068823478  | 0.918917864357936  | NA                      | NA                 | NA                                                                                  | XP_021706445.1 rho GTPase-activating protein 26                                 |
| AAEL0125c ubiquitin-protein ligase E3A                                      | 0.066586185828152  | 0.607632538760669  | 0.893547770777888  | NA                      | aag04120           | KXJ73884.1 hypothe                                                                  | XP_021710239.1ubiquitin-protein ligase E3A                                      |
| AAEL0075c protein D2                                                        | 0.0666992119922528 | 0.601287272866049  | 0.892138904371716  | NA                      | KFB38652.1 phospha | XP_001658443.1protein D2                                                            |                                                                                 |
| AAEL0125c uncharacterized LOC5576523                                        | 0.0667838136612414 | 0.628832152451402  | 0.901045385683245  | NA                      | NA                 | NA                                                                                  | XP_001662716.2uncharacterized protein LOC5576523                                |
| AAEL0036c sodium-dependent nutrient amino acid transporter 1                | 0.0668821663521644 | 0.624453210927141  | 0.898970345267764  | NA                      | XP_019558042.1 PRÉ | XP_021705241.1sodium-dependent nutrient amino acid transporter 1 isoform X2         |                                                                                 |
| AAEL0245c NA                                                                | 0.0668833759271329 | 0.641673166845175  | 0.905347513233564  | NA                      | aag03010           | NA                                                                                  | XP_019538784.1 60S ribosomal protein L19                                        |
| AAEL0042c metallophosphoesterase 1                                          | 0.0669139649026786 | 0.842704231952414  | 0.963198678766584  | NA                      | XP_019555827.1 PRÉ | XP_001648851.1metallophosphoesterase 1 isoform X1                                   |                                                                                 |
| AAEL0039c Y+L amino acid transporter 2                                      | 0.0669870460194941 | 0.663216846540864  | 0.911397525386277  | NA                      | NA                 | KFB46283.1 cationic                                                                 | XP_021693215.1Y+L amino acid transporter 2                                      |
| AAEL0200c NA                                                                | 0.0669978780856076 | 0.572924168634319  | 0.880923047085115  | NA                      | NA                 | NA                                                                                  | XP_021699194.1protein Smaug isoform X2                                          |
| AAEL0120c protein krasavietz                                                | 0.0670522489888532 | 0.569896075477401  | 0.880635379772131  | NA                      | NA                 | KXJ73292.1 hypothe                                                                  | XP_001655819.1protein krasavietz                                                |
| AAEL0019c protein msta                                                      | 0.0670647524524591 | 0.651740384330157  | 0.9071712339858737 | NA                      | NA                 | KXJ78702.1 hypothe                                                                  | XP_021706626.1protein msta                                                      |
| AAEL0045c 26S proteasome regulatory subunit 10B                             | 0.0670967019001943 | 0.566428517591964  | 0.880302387766415  | NA                      | aag03050           | ETN64193.1 26S prot                                                                 | XP_001649399.126S proteasome regulatory subunit 10B                             |
| AAEL0050c ras-related protein Rab-1A                                        | 0.0671912055583499 | 0.539851139457285  | 0.869709828277711  | NA                      | aag04140           | ETN59196.1 Rab-pro                                                                  | XP_001650303.1ras-related protein Rab-1A                                        |
| AAEL0255c NA                                                                | 0.0671972324859838 | 0.787602059919567  | 0.944774185961398  | NA                      | aag03008           | NA                                                                                  | XP_021709805.1elongation factor-like GTPase 1                                   |
| AAEL0155c NA                                                                | 0.0672129960117401 | 0.692890994876057  | 0.916122517126697  | NA                      | NA                 | NA                                                                                  | XP_019528575.1 polymerase-2-like                                                |
| AAEL0008c phosphatidylinositol phosphatase PTPRQ                            | 0.067269746737159  | 0.628823133664547  | 0.901045385683245  | NA                      | NA                 | KXJ69868.1 hypothe                                                                  | XP_021710456.1phosphatidylinositol phosphatase PTPRQ                            |
| AAEL0038c 28S ribosomal protein S5, mitochondrial                           | 0.0675226272165175 | 0.556957835662205  | 0.876835490527944  | NA                      | aag03010           | KXJ74583.1 hypothe                                                                  | XP_001664173.228S ribosomal protein S5, mitochondrial                           |
| AAEL0202c NA                                                                | 0.0675244515737633 | 0.563408663201861  | 0.879621058497374  | NA                      | aag04144           | NA                                                                                  | XP_021697863.1vacuolar protein sorting-associated protein 26B-like              |
| AAEL0262c NA                                                                | 0.0675251912725939 | 0.577918605712566  | 0.882161363828145  | NA                      | NA                 | NA                                                                                  | XP_021713390.1ectopic P granules protein 5 homolog isoform X1                   |
| AAEL0005c poly(A) RNA polymerase, mitochondrial                             | 0.0675732327734315 | 0.706891960550621  | 0.91797784850989   | NA                      | NA                 | XP_019548151.1 PRÉ                                                                  | XP_001657730.2poly(A) RNA polymerase, mitochondrial                             |
| AAEL0008c GDP-fucose protein O-fucosyltransferase 1                         | 0.0675860939107506 | 0.785664108859085  | 0.944372632355572  | 514                     | aag00514           | KXJ69367.1 hypothe                                                                  | XP_001651293.1GDP-fucose protein O-fucosyltransferase 1                         |
| AAEL0261c NA                                                                | 0.0675943885609028 | 0.708403948341041  | 0.918037119649945  | 230                     | NA                 | NA                                                                                  | XP_021698103.1adenosine deaminase 2                                             |
| AAEL0098c signal recognition particle receptor subunit beta                 | 0.0677082136115633 | 0.623931636772448  | 0.898781922601764  | NA                      | aag03060           | NA                                                                                  | XP_001660441.2signal recognition particle receptor subunit beta                 |
| AAEL0107c DNA-(apurinic or apyrimidinic site) lyase                         | 0.0677189447403037 | 0.73467290331735   | 0.926618579210021  | NA                      | aag03410           | KXJ77335.1 hypothe                                                                  | XP_001654881.1recombination repair protein 1 isoform X1                         |
| AAEL0280c NA                                                                | 0.0677302036107522 | 0.868526105460178  | 0.96863134437578   | NA                      | NA                 | NA                                                                                  |                                                                                 |
| AAEL0076c toll 5A                                                           | 0.0678477864360781 | 0.550798109702675  | 0.87417112892101   | NA                      | NA                 | XP_019530873.1 PRÉ                                                                  | XP_021703075.1protein toll                                                      |
| AAEL0112c NA                                                                | 0.067865971352745  | 0.678604746717724  | 0.914481546552978  | NA                      | NA                 | KXJ78440.1 hypothe                                                                  | XP_001661576.2uncharacterized protein LOC5574656                                |
| AAEL0028c dipeptidyl peptidase 3                                            | 0.0678785622200687 | 0.609239347909825  | 0.893547770777888  | NA                      | NA                 | XP_001846798.1 dip                                                                  | XP_001656105.2dipeptidyl peptidase 3                                            |
| AAEL0054c CTP synthase                                                      | 0.0679735824500451 | 0.534218595140247  | 0.866700945213732  | 240                     | aag01100 ; aag     | KXJ80340.1 hypothe                                                                  | XP_001650904.1CTP synthase                                                      |
| AAEL0084c 27 kDa hemolymph protein                                          | 0.068044327008883  | 0.558298296593741  | 0.877581080323399  | NA                      | NA                 | KXJ70685.1 hypothe                                                                  | XP_001659257.127 kDa hemolymph protein                                          |
| AAEL0088c uncharacterized LOC5571163                                        | 0.0680819443028906 | 0.843424103971169  | 0.963198678766584  | NA                      | NA                 | XP_001859663.1 dec                                                                  | XP_001859663.1deoxyribonuclease I                                               |
| AAEL0198c NA                                                                | 0.068095257253311  | 0.678954741642296  | 0.914481546552978  | NA                      | NA                 | NA                                                                                  | XP_021695174.1uncharacterized protein LOC5569552 isoform X3                     |
| AAEL0120c transmembrane 9 superfamily member 3                              | 0.0681147562213779 | 0.557266461273637  | 0.877025137102789  | NA                      | NA                 | XP_019541670.1 PRÉ                                                                  | XP_001662153.1transmembrane 9 superfamily member 3                              |
| AAEL0099c trans-1,2-dihydrobenzene-1,2-diol dehydrogenase                   | 0.0681512705698356 | 0.66638223259376   | 0.911964500946328  | NA                      | aag01100 ; aag     | NA                                                                                  | XP_001660494.2trans-1,2-dihydrobenzene-1,2-diol dehydrogenase                   |
| AAEL0035c DNA-directed RNA polymerases I, II, and III subunit RPABC2        | 0.068276135313185  | 0.6247464595744971 | 0.898996686480879  | NA                      | aag03020           | ETN61755.1 DNA-dir                                                                  | XP_001663881.1DNA-directed RNA polymerases I, II, and III subunit RPABC2        |
| AAEL0144c uncharacterized LOC5564473                                        | 0.068400718708531  | 0.711471701360577  | 0.918935795219545  | NA                      | NA                 | XP_001648812.2uncharacterized protein LOC5564473                                    |                                                                                 |
| AAEL0021c phosphatidylinositol transfer protein CSR1                        | 0.0684020402171363 | 0.613749243676842  | 0.896036893592622  | NA                      | NA                 | KXJ78906.1 hypothe                                                                  | XP_001654815.1phosphatidylinositol transfer protein CSR1                        |
| AAEL0011c S-adenosylmethionine decarboxylase proenzyme                      | 0.0684755362412708 | 0.541411207661149  | 0.869735874782513  | 00270 ; 00330           | aag01100 ; aag     | XP_019538204.1 PRÉ                                                                  | XP_001658186.1S-adenosylmethionine decarboxylase proenzyme isoform X2           |
| AAEL0139c uncharacterized LOC5578946                                        | 0.0684900426845873 | 0.826960322388992  | 0.956432333168643  | NA                      | NA                 | XP_021711082.1uncharacterized protein LOC5578946                                    |                                                                                 |
| AAEL0072c fasciculation and elongation protein zeta-2                       | 0.0685446506369953 | 0.615508511172118  | 0.897164966965308  | NA                      | ETN58498.1 hypothe | XP_021705484.1fasciculation and elongation protein zeta-2                           |                                                                                 |
| AAEL0140c ranBP-type and C3HC4-type zinc finger-containing protein 1        | 0.06872293122785   | 0.836688048537121  | 0.961679168453483  | NA                      | NA                 | XP_021702951.1ranBP-type and C3HC4-type zinc finger-containing protein 1 isoform X1 |                                                                                 |
| AAEL0200c NA                                                                | 0.0687377123586285 | 0.771989687016545  | 0.941147080452193  | NA                      | NA                 | NA                                                                                  | XP_021712458.1carboxypeptidase D-like                                           |
| AAEL0233c NA                                                                | 0.0688443843858055 | 0.648952917404417  | 0.906581557985861  |                         |                    |                                                                                     |                                                                                 |
